# Supplementary material for: Development and evaluation of a machine learning-based in-hospital COVID-19 disease outcome predictor (CODOP): A multicontinental retrospective study
Source: eLife. 2022 May 17;11:e75985. doi: 10.7554/eLife.75985 (PMC9129872; doi:10.7554/eLife.75985)
Supplement: Figure 2—figure supplement 1—source data 1. [file elife-75985-fig2-figsupp1-data1.xlsx]

## Sheet: Klen etal_Fig 2-figsup1_Sdata1
Log(lambda)	Error
-1.92091487079177	0.153637544090177
-2.01394861183619	0.150054131197344
-2.10698235288062	0.147005791468278
-2.20001609392505	0.142958349679091
-2.29304983496948	0.138454314354861
-2.38608357601391	0.134567619233603
-2.47911731705833	0.1313398039423
-2.57215105810276	0.128655654226066
-2.66518479914719	0.12621413624112
-2.75821854019162	0.123815979476598
-2.85125228123605	0.121548010082522
-2.94428602228047	0.119631110817126
-3.0373197633249	0.118038875438394
-3.13035350436933	0.116714400035242
-3.22338724541376	0.115420668242306
-3.31642098645819	0.114113012351497
-3.40945472750262	0.112986547817298
-3.50248846854704	0.112051626539565
-3.59552220959147	0.111275441017122
-3.6885559506359	0.110631183285863
-3.78158969168033	0.110096709949135
-3.87462343272476	0.10965300175637
-3.96765717376918	0.109282979869817
-4.06069091481361	0.108946168983074
-4.15372465585804	0.108646303915222
-4.24675839690247	0.108390065833016
-4.3397921379469	0.108147701391047
-4.43282587899132	0.107929449646105
-4.52585962003575	0.10774132594858
-4.61889336108018	0.107583905352738
-4.71192710212461	0.107453330674546
-4.80496084316904	0.107345033142664
-4.89799458421346	0.107255220913195
-4.99102832525789	0.107180746775316
-5.08406206630232	0.107118998634907
-5.17709580734675	0.107067808592299
-5.27012954839118	0.107025377463067
-5.36316328943561	0.106990212119458
-5.45619703048003	0.106961073475212
-5.54923077152446	0.106936933306289
-5.64226451256889	0.106916938406889
-5.73529825361332	0.106900380835001
-5.82833199465775	0.106886673213232
-5.92136573570217	0.106875328226317
-6.0143994767466	0.106865941602502
-6.10743321779103	0.106858177987032
-6.20046695883546	0.106851759216493
-6.29350069987989	0.106846454945515
-6.38653444092431	0.106842140634496
-6.47956818196874	0.106838516750336
-6.57260192301317	0.106835523741482
-6.6656356640576	0.106833056450996
-6.75866940510203	0.10683113073645
-6.85170314614646	0.106829457472498
-6.94473688719088	0.106828065751041
-7.03777062823531	0.106826919137392
-7.13080436927974	0.10682597705105
-7.22383811032417	0.10682520415851
-7.3168718513686	0.106824570951333
-7.40990559241302	0.10682405296728
-7.50293933345745	0.106823629958848
-7.59597307450188	0.106823291775116
