# Supplementary material for: Development and evaluation of a machine learning-based in-hospital COVID-19 disease outcome predictor (CODOP): A multicontinental retrospective study
Source: eLife. 2022 May 17;11:e75985. doi: 10.7554/eLife.75985 (PMC9129872; doi:10.7554/eLife.75985)
Supplement: Figure 2—figure supplement 2—source data 1. — al. in the Test 1, Test 2, External Test 3, and Test 4 datasets. [file elife-75985-fig2-figsupp2-data1.xlsx]

## Sheet: Klen etal_Fig 2-figsup2_Sdata1
Test 1						Test 2						External Test 3						Test 4
outcome	CODOP	COPE	Zhang	Age		outcome	CODOP	COPE	Zhang	Age		outcome	CODOP	COPE	Zhang	Age		outcome	CODOP	COPE	Zhang	Age
0	0.765586400318513	0.340580810631443	0.970801369675628	69		1	0.449159915068783	0.19361179334119	0.00559036351268281	83		1	0.449159915068783	0.19361179334119	0.00559036351268281	83		0	-0.0321191016025654	0.0189162139830326	0.0499200169126595	27
1	0.620887194430167	0.231820178224073	0.566059106509224	59		0	0.183853364015807	0.100480930454418	0.060919383739948	61		0	0.183853364015807	0.100480930454418	0.060919383739948	61		0	0.447010509725079	0.224414326741701	0.397423318421881	79
0	0.0490983898157281	0.0470017314066354	0.00522818126024064	50		0	0.09566842935193	0.0394671127874005	0.00244833456884469	69		0	0.09566842935193	0.0394671127874005	0.00244833456884469	69		0	-0.159284427996483	0.00480700741112146	0.0374460058544103	19
0	0.549297958389096	0.286576737093791	0.240233475441652	72		0	0.0976991933741894	0.0289034600596081	0.381153302675987	42		0	0.0976991933741894	0.0289034600596081	0.381153302675987	42		0	0.114233157375155	0.0514538029622961	0.0155079675252688	62
0	0.253984414442867	0.0720055435165042	0.432146228847885	49		0	0.309094800687225	0.128687712514842	0.00761257634835935	77		0	0.309094800687225	0.128687712514842	0.00761257634835935	77		0	0.280579543536732	0.104362681532407	0.0896962079594642	88
0	0.229681504814521	0.0935376370337813	0.0993556229596359	53		0	0.260234604757891	0.148166310548236	0.0543376144345443	64		0	0.260234604757891	0.148166310548236	0.0543376144345443	64		0	-0.0825227613457251	0.0197162807748351	0.0181363455071697	32
0	0.256781904477371	0.102135847725153	0.115868496219654	65		0	0.0985862123723614	0.0561747037373057	0.0111551527825603	36		0	0.0985862123723614	0.0561747037373057	0.0111551527825603	36		0	0.271427994114901	0.189228221345087	0.0287762560920665	86
0	0.113276770391163	0.0435096290511232	0.0822206951589137	41		0	-0.0061570576960318	0.0258772757581525	0.0124579646163964	44		0	-0.0061570576960318	0.0258772757581525	0.0124579646163964	44		0	0.234396736012144	0.159610253869462	0.0184680955288537	82
0	0.37559589347683	0.285660388553952	0.0120282041024795	84		0	-0.0330393125998625	0.0153683311579083	0.00759087935893825	41		0	-0.0330393125998625	0.0153683311579083	0.00759087935893825	41		0	0.328079827425905	0.2101831726609	0.0581459719872963	91
0	0.163151230075092	0.0662540263833771	0.0311393072808496	60		0	0.0665592230728792	0.0397267449475371	0.00632794985441586	60		0	0.0665592230728792	0.0397267449475371	0.00632794985441586	60		1	0.842161934510348	0.456737871024587	0.531764301279263	96
1	0.258752649228173	0.139954343194376	0.0455445536456615	76		0	0.27236345276064	0.226723492997631	0.011184665385582	77		0	0.27236345276064	0.226723492997631	0.011184665385582	77		0	0.260097523071169	0.192611841789932	0.0267634186263737	96
0	0.190993055125994	0.0936100274991237	0.0269277778841476	73		0	0.234251444258778	0.0930991558845232	0.00892437172101406	86		0	0.234251444258778	0.0930991558845232	0.00892437172101406	86		0	0.240414219897914	0.122321686822488	0.030694726733764	75
0	0.308915498989377	0.0863765711020408	0.325372538051572	38		1	0.18278224846645	0.068985564628828	0.00468091431886024	87		1	0.18278224846645	0.068985564628828	0.00468091431886024	87		0	-0.141494027288162	0.00794465991905525	0.0136946766455844	12
0	0.138136319703933	0.0799175116063857	0.025065499361034	68		0	0.220106183069629	0.0864714510840683	0.0493767133285379	68		0	0.220106183069629	0.0864714510840683	0.0493767133285379	68		0	-0.0913317105463478	0.00601519328920973	0.533133798932328	5
0	0.0232379043325456	0.0385339484388022	0.0157001560739665	50		0	0.129922133210099	0.0406272153272706	0.05340667050016	74		0	0.129922133210099	0.0406272153272706	0.05340667050016	74		0	0.0624107740335868	0.0286865694710582	0.0479547366218971	51
0	0.182956744799413	0.0685923122506766	0.0228474131767592	64		0	0.144851597493336	0.036575468383126	0.0090529904936112	76		0	0.144851597493336	0.036575468383126	0.0090529904936112	76		0	-0.151234594652619	0.00487583925385022	0.00260844233862414	1
0	0.00773595526579002	0.0343662983721528	0.038621840074532	45		0	0.132522099156827	0.0531349831949714	0.0196177280980344	67		0	0.132522099156827	0.0531349831949714	0.0196177280980344	67		0	-0.0100441441488574	0.0137310232685416	0.114921141364645	24
0	0.0933037686838108	0.0497637172408475	0.0349993286638959	43		0	0.0246248387682628	0.0242599017405576	0.0234691186644294	49		0	0.0246248387682628	0.0242599017405576	0.0234691186644294	49		0	0.021615523158135	0.0148538059670358	0.194400295899338	24
0	0.141022062090241	0.0606768606885936	0.0608873550172144	49		0	0.374227904798904	0.104994898694437	0.0472024829165432	86		0	0.374227904798904	0.104994898694437	0.0472024829165432	86		0	0.230002067578624	0.0813659376199057	0.0383093438556917	80
0	0.254537051430265	0.113358011904	0.162247479190407	63		0	0.175433894291051	0.0789907787932988	0.00755709282967467	79		0	0.175433894291051	0.0789907787932988	0.00755709282967467	79		1	0.438711261799886	0.293759702026679	0.0862359304557109	86
1	0.429955489949702	0.301003383945424	0.177427446456307	77		0	0.141202871537664	0.038658661468554	0.206687222838266	42		0	0.141202871537664	0.038658661468554	0.206687222838266	42		0	0.247025530016779	0.15289430770987	0.01415881137261	91
0	0.519017701779454	0.42983344664867	0.0237526975358872	80		0	0.249194720782734	0.172611890555438	0.00899211047256971	88		0	0.249194720782734	0.172611890555438	0.00899211047256971	88		0	0.181501807979937	0.129857883302104	0.0225004875264533	76
0	0.333346376918856	0.237457921615398	0.0395008875550614	73		1	0.321720129319327	0.25127349314062	0.0353277403044568	89		1	0.321720129319327	0.25127349314062	0.0353277403044568	89		0	0.346053838239756	0.121802801832829	0.0298653864630875	74
0	0.126205240765095	0.0717130151458687	0.180946215605721	52		0	0.364881184565828	0.153836767186281	0.0166596950732778	90		0	0.364881184565828	0.153836767186281	0.0166596950732778	90		0	0.140657183544095	0.0679594372480103	0.017113792286048	70
0	0.252413189039071	0.101483754145646	0.0969397241732158	54		0	0.15238056803504	0.0660281558851609	0.147509948698927	57		0	0.15238056803504	0.0660281558851609	0.147509948698927	57		0	0.19912446830309	0.149388142693422	0.0186092768890935	86
0	0.314343684633015	0.201951201866704	0.148522082307634	67		0	0.246777182857556	0.0930714232895291	0.103753190953759	57		0	0.246777182857556	0.0930714232895291	0.103753190953759	57		0	0.206812031260567	0.0999407491546409	0.0242050670930876	83
0	0.351694047599234	0.221114115083998	0.0882944425638522	75		0	0.251223345887174	0.137803816246449	0.0782465589611439	83		0	0.251223345887174	0.137803816246449	0.0782465589611439	83		0	0.208987360895107	0.106713051466776	0.0413377603324892	82
0	0.155246531012635	0.0796626032188641	0.155270209323918	49		0	-0.000533210918049039	0.0322269251239652	0.000631191466821124	46		0	-0.000533210918049039	0.0322269251239652	0.000631191466821124	46		0	-0.0705617805463749	0.0101098872219658	0.00993601990169934	43
0	0.194742174755722	0.0612440806909017	0.140479884960866	33		0	0.239087664916732	0.159570783290758	0.0118136819169334	86		0	0.239087664916732	0.159570783290758	0.0118136819169334	86		0	0.246939121917659	0.111169881019198	0.0424055035602835	79
1	0.455405702616538	0.145696839436721	0.0381730877927539	89		0	0.121512941973881	0.0802910516254804	0.0400896415983156	72		0	0.121512941973881	0.0802910516254804	0.0400896415983156	72		0	0.197053285862726	0.0413587550717909	0.0275289191405019	81
1	0.183992586262712	0.128671847601694	0.0153310106428131	76		0	0.139212892053007	0.0399050791439322	0.00357520256687949	79		0	0.139212892053007	0.0399050791439322	0.00357520256687949	79		1	0.659156659028727	0.276951835633968	0.933759919451687	83
0	0.227564876032452	0.118714946522049	0.0374645437747587	81		0	0.24270025223205	0.165687173480843	0.0173192802923697	82		0	0.24270025223205	0.165687173480843	0.0173192802923697	82		0	0.39441202248478	0.22112973356948	0.414465598441505	71
1	0.455562087792271	0.303038236263576	0.419895391710177	83		0	0.179255211917408	0.0895966273004678	0.0424023499272657	75		0	0.179255211917408	0.0895966273004678	0.0424023499272657	75		0	0.391304347225632	0.255014721098709	0.18261472947306	96
1	0.29142156121395	0.150634776504709	0.0330634346088963	86		0	0.240952373306452	0.13131846980652	0.0236635140522309	73		0	0.240952373306452	0.13131846980652	0.0236635140522309	73		0	0.175406617468524	0.108458360999751	0.0299169085799431	86
0	0.219742582674646	0.0595402942117529	0.0331891801407593	74		0	0.0450317324231057	0.0203558494447531	0.00629599967294229	56		0	0.0450317324231057	0.0203558494447531	0.00629599967294229	56		0	0.849458450187861	0.170010884900363	0.902555461253656	70
0	0.1670511049006	0.115512434397942	0.0207873761568153	82		0	0.032473725338437	0.0380105840789777	0.00910805850604951	49		0	0.032473725338437	0.0380105840789777	0.00910805850604951	49		1	0.482230811789656	0.479343006310525	0.0840437649647101	97
0	0.431502996765838	0.156076490861947	0.527760962652869	70		0	0.104069273317955	0.0431984183050203	0.0148601142886967	64		0	0.104069273317955	0.0431984183050203	0.0148601142886967	64		0	-0.0363845587502043	0.0157960109427263	0.00581885975439517	44
0	0.466939967817172	0.217191058991612	0.608089620484741	88		0	0.102243398688446	0.0704601193587416	0.0421073697154779	62		0	0.102243398688446	0.0704601193587416	0.0421073697154779	62		0	0.0490389662258087	0.0314154811102973	0.0321232651312939	42
1	0.30466596947467	0.233058697322418	0.0456451625224011	85		0	-0.0307078382264002	0.0272103092993508	0.00989202333763388	41		0	-0.0307078382264002	0.0272103092993508	0.00989202333763388	41		0	0.127276851200435	0.0325926033308287	0.011938847901966	60
1	0.260727330636811	0	0.0592665976316041	76		0	0.448160324689708	0.182316155518438	5.60686809704798e-13	82		0	0.448160324689708	0.182316155518438	5.60686809704798e-13	82		0	0.0224557819671119	0.0290139683572183	0.0120829953260179	44
0	0.236939878640725	0.0967283419092801	0.0700212534033754	73		0	0.327500764399109	0.134452104615678	0.636513804816602	63		0	0.327500764399109	0.134452104615678	0.636513804816602	63		0	-0.371869260455222	0.00228163862684256	0.000930836070584219	0
0	0.294747291040197	0.14255333104424	0.0833797403295956	90		0	-0.0404588401536655	0.0241327100101868	0.0135495078027955	37		0	-0.0404588401536655	0.0241327100101868	0.0135495078027955	37		0	0.504620671264915	0.276286135081764	0.506894466814657	91
0	0.370120173596442	0.141200294424981	0.490828799550978	85		0	0.160593222853785	0.0851464685592782	0.181205718626141	52		0	0.160593222853785	0.0851464685592782	0.181205718626141	52		0	0.405428009256762	0.205060223230748	0.461200256836604	84
0	0.31954324446531	0.180542028013363	0.460230705911983	69		0	0.149044884990781	0.0828845790824322	0.0628506775298064	57		0	0.149044884990781	0.0828845790824322	0.0628506775298064	57		1	0.498813420775883	0.108720513785379	0.172225804330708	87
0	0.253955594746688	0.131851145906656	0.0466349369754545	83		0	0.379733359558845	0.18296751213183	0.254332008352241	86		0	0.379733359558845	0.18296751213183	0.254332008352241	86		0	-0.266919218140053	0.00475513603444474	0.00670041259018452	0
0	0.262690625187124	0.141168443282206	0.0747184571370837	86		0	0.0682652482347006	0.0324853135759704	0.00196434740935351	55		0	0.0682652482347006	0.0324853135759704	0.00196434740935351	55		0	0.345830980104816	0.109226511348397	0.568914347390288	66
0	0.327068375125943	0.0974574913945714	0.635881551431628	69		0	0.153465365695733	0.0792008857653038	0.0805833072950519	55		0	0.153465365695733	0.0792008857653038	0.0805833072950519	55		0	0.161123616237958	0.0752415807780372	0.0276184773389086	62
0	0.429347604598223	0.168196087722173	0.556660348628751	89		0	0.370573370385519	0.110141503193828	0.329146704276494	60		0	0.370573370385519	0.110141503193828	0.329146704276494	60		0	0.228425684338059	0.0332666724023801	0.0251757163687352	85
0	0.263653377063636	0.120420178574641	0.029318834943017	86		0	0.228590748586998	0.143029271996357	0.0924622078413901	68		0	0.228590748586998	0.143029271996357	0.0924622078413901	68		0	0.314489446406596	0.175176349831801	0.0504755185551897	81
0	0.359966514327937	0.214368859190513	0.0259190821838092	88		0	0.660925487120442	0.263883433014725	0.60932199861372	91		0	0.660925487120442	0.263883433014725	0.60932199861372	91		0	0.239156327817273	0.138018730895988	0.0303532034380214	86
0	0.198361622987172	0.0598737351364791	0.00814048407359379	78		0	0.265426831878634	0.143561302233208	0.131411573816318	63		0	0.265426831878634	0.143561302233208	0.131411573816318	63		0	0.459342968637027	0.308675887234805	0.277874157425488	96
0	0.299747434382047	0.171536339725066	0.0596072768742185	83		0	0.282606503770504	0.171340761597146	0.0696819683427812	86		0	0.282606503770504	0.171340761597146	0.0696819683427812	86		0	0.218627678652281	0.148042083524935	0.0189539977771368	82
0	0.18058981788979	0.0575078259515032	0.0374665271775603	69		0	0.277327584243405	0.219888377609127	0.143400149893176	71		0	0.277327584243405	0.219888377609127	0.143400149893176	71		0	0.421135106685236	0.234125842613468	0.178338415588641	92
0	0.315884441423207	0.158806024119811	0.00275066008046122	83		1	0.51381837477133	0.273972918163371	0.0545092427501048	94		1	0.51381837477133	0.273972918163371	0.0545092427501048	94		0	0.222392759042525	0.144455791414732	0.0161477515823391	88
0	0.227870140560342	0.115633464228707	0.0463265169922825	84		1	0.647205527615857	0.373237021834468	0.641015440394174	89		1	0.647205527615857	0.373237021834468	0.641015440394174	89		1	0.411570839793038	0.181205815688242	0.430307311368317	63
1	0.319889787779155	0.151770558807449	0.427075063498023	67		0	0.157822928054943	0.0903744807625244	0.0113628185422253	80		0	0.157822928054943	0.0903744807625244	0.0113628185422253	80		0	0.199533692200012	0.0968147114176264	0.0279501912494518	81
0	0.299050253647635	0.186406025186172	0.0329249008961188	83		0	0.28645796386615	0.152795296841004	0.0586047177369703	76		0	0.28645796386615	0.152795296841004	0.0586047177369703	76		0	0.324606119279892	0.248116239040759	0.0214533209562822	90
0	0.525978546643845	0.15255232543531	0.460622010008321	72		1	0.344094052614768	0.133031411728314	0.00246030441578969	88		1	0.344094052614768	0.133031411728314	0.00246030441578969	88		0	-0.241175643958608	0.00558014625592252	0.00715476366443748	5
0	0.277790745818902	0.0967593367776773	0.0176604921501835	81		0	0.205845538829061	0.0598738251492504	0.234835618164575	62		0	0.205845538829061	0.0598738251492504	0.234835618164575	62		0	0.031473847691919	0.0272808827295098	0.0133862163187261	45
1	0.0966878629182469	0.0342639122634786	0.00987729768252354	67		0	0.278893981995901	0.157427977021504	0.110624009025912	80		0	0.278893981995901	0.157427977021504	0.110624009025912	80		0	0.377118076718423	0.0951056727312244	0.47472153602235	64
0	0.0574402787453619	0.0265441584603623	0.10413888851658	53		0	0.166875129722395	0.0765806446437835	0.0551364805720159	58		0	0.166875129722395	0.0765806446437835	0.0551364805720159	58		0	0.379527598604101	0.242006609567933	0.0995518747303598	89
0	-0.115357316667399	0.0163314236923299	0.0155374913327162	46		0	0.349516403934061	0.22108565145501	0.0299023426655037	78		0	0.349516403934061	0.22108565145501	0.0299023426655037	78		0	-0.101381123395318	0.0206353157026012	0.00663218625673941	37
0	0.0335296240340482	0.0519935143784657	0.000876392264684147	57		0	0.278028651755766	0.163024489244423	0.276108039917022	75		0	0.278028651755766	0.163024489244423	0.276108039917022	75		0	-0.296703128767626	0.00307210878654899	0.0138777922956891	1
0	0.26667623913454	0.173638930729141	0.0216273075961073	79		1	0.360218589321892	0.193518657271432	0.233158467356112	89		1	0.360218589321892	0.193518657271432	0.233158467356112	89		0	0.155405289874106	0.0890788871955913	0.0175722778993773	69
1	0.412067668752198	0.362426808976371	0.236621182377585	90		0	0.153489057929371	0.119071215099248	0.0353908760982236	82		0	0.153489057929371	0.119071215099248	0.0353908760982236	82		0	-0.204979786389573	0.00489972921467147	0.0118079549214908	1
0	0.108165225372928	0	0.00748267650911832	71		0	0.419782828860955	0.316824756480464	0.0155776789836378	95		0	0.419782828860955	0.316824756480464	0.0155776789836378	95		0	0.402719369733463	0.110245726102993	0.0540241269166757	87
0	0.162727024405223	0.090180367139012	0.0433714860468088	74		0	0.409480833037866	0.299445874107397	0.141914994959207	89		0	0.409480833037866	0.299445874107397	0.141914994959207	89		1	0.308822733164079	0.179226049355077	0.0706390212058318	90
0	-0.141884802628289	0.0146579988508039	0.00841822055666274	29		0	0.142082150387038	0.0875782503533039	0.0147359307351213	75		0	0.142082150387038	0.0875782503533039	0.0147359307351213	75		0	0.278624090814189	0.138169626180446	0.0261922415575816	69
0	0.253616247596302	0.0580665102286339	0.0743550657236939	92		0	0.427513469414011	0.289498662682518	0.154814718563312	88		0	0.427513469414011	0.289498662682518	0.154814718563312	88		0	-0.213569908629033	0.00658607007119262	0.00550679489614532	7
0	0.0773583861700482	0.0668739526048188	0.0269005928615422	60		0	0.029817063338076	0.0426243771926815	0.00217349289793456	56		0	0.029817063338076	0.0426243771926815	0.00217349289793456	56		0	0.0128407076770695	0.0255535754332644	0.0388293587430343	41
0	0.0298371824276669	0.0329202697662533	0.0235478801133064	59		0	0.249547235277362	0.101740229851976	0.0314309154889468	91		0	0.249547235277362	0.101740229851976	0.0314309154889468	91		0	0.0572334336909619	0.0557918411187214	0.0103458759624993	55
0	0.463497532283235	0.370338668203535	0.00272342212808185	88		0	0.211812964196949	0.101607728046042	0.0609122309476466	70		0	0.211812964196949	0.101607728046042	0.0609122309476466	70		0	0.149404742295718	0.089970347381917	0.00619468644662349	75
0	-0.0665023404063511	0.0183424182468353	0.00753050690721318	51		0	0.447954968054637	0.218980563713326	0.232666961785166	88		0	0.447954968054637	0.218980563713326	0.232666961785166	88		1	0.235419057206583	0.11947280437016	0.0113141939160193	77
0	0.136566464287785	0.0774061486371573	0.04202488601925	63		1	0.364736007593718	0.159564989633214	0.194934701758388	85		1	0.364736007593718	0.159564989633214	0.194934701758388	85		0	0.237004466602972	0.0890273818686526	0.0215107759060747	72
0	0.23350274657251	0	0.0431096096305945	87		0	0.0827625043740216	0.0777455385685146	0.0079325700776927	78		0	0.0827625043740216	0.0777455385685146	0.0079325700776927	78		0	-0.204042787873576	0.0049348549812941	0.0118338405628437	1
0	0.0339192713503759	0.0249758074360862	0.0168300681764202	59		0	0.0399811650606616	0.03072979073877	0.0396864922792612	41		0	0.0399811650606616	0.03072979073877	0.0396864922792612	41		0	0.00554594042292511	0.00736755272242264	0.0803296336989107	35
0	0.180929520430832	0.0452613822292791	0.00438994523861802	79		0	0.323976418812133	0.217165888431639	0.284482784997041	91		0	0.323976418812133	0.217165888431639	0.284482784997041	91		0	0.314132984782687	0.14751077001581	0.0875812852310094	78
0	0.249758302730773	0.0881677695420586	0.00928426222288456	92		0	0.39078875749082	0.154316167501693	0.394825986073764	85		0	0.39078875749082	0.154316167501693	0.394825986073764	85		0	-0.159878943730806	0.00567758725268587	0.0453954996538301	5
0	0.0854344767327437	0.071072999235328	0.0442677695838204	58		1	0.630006914577941	0.31647005873168	0.833743092286138	82		1	0.630006914577941	0.31647005873168	0.833743092286138	82		0	0.0225464672931376	0.0273711692239057	0.0200553450893372	39
0	-0.213259045861965	0.0059096643697939	0.00804448964662403	26		0	0.195638785299267	0.110541883597591	0.0287946054283802	71		0	0.195638785299267	0.110541883597591	0.0287946054283802	71		0	0.188462971402173	0.0405372649433346	0.0177875265071446	65
0	0.284369937739931	0.129564889583343	0.339036036358969	69		0	-0.0597530117452393	0.0801102467351879	6.98093412378337e-05	67		0	-0.0597530117452393	0.0801102467351879	6.98093412378337e-05	67		0	-0.24904471309974	0.00567356510360329	0.00623744409220896	14
1	0.383695425116387	0.143951481286869	0.133506676432293	91		0	-0.0201312576026106	0.0275314150723815	0.00550146110469746	30		0	-0.0201312576026106	0.0275314150723815	0.00550146110469746	30		0	0.0111543744221223	0.00987684151233073	0.504245068378471	12
0	0.129650490187864	0.076815869102289	0.0574811464461265	67		0	0.304890948775857	0.204652612060734	0.148973235459616	85		0	0.304890948775857	0.204652612060734	0.148973235459616	85		0	-0.26276355354527	0.00184772757408365	0.00455319901826188	16
0	-0.0290951100945726	0.0249200518783199	0.0550810761802452	46		1	0.454700892944102	0.171382365512544	0.684340860040569	89		1	0.454700892944102	0.171382365512544	0.684340860040569	89		1	0.155320800866959	0.0722060561659022	0.0272522960875809	61
0	-0.141316435050811	0.0189751016014872	0.00431581904475334	36		0	0.133977799429915	0.0623439574580802	0.0721232187887325	48		0	0.133977799429915	0.0623439574580802	0.0721232187887325	48		0	0.402275822751784	0.218816408667129	0.138358631053255	87
0	0.0940191584958154	0.0507778125123002	0.0260149415098518	61		0	0.162255406131743	0.110652634223459	0.0184465338594466	78		0	0.162255406131743	0.110652634223459	0.0184465338594466	78		0	0.158773365511175	0.0300262188832114	0.00776218879258145	49
0	0.117946105046176	0.0819748181357072	0.0332401731325611	89		1	0.410176920962533	0.116260074870713	0.129271026119832	80		1	0.410176920962533	0.116260074870713	0.129271026119832	80		1	0.185357388797889	0.0732245358608151	0.0174486506093345	67
0	0.16622858468969	0.0963495448427582	0.0402663402899201	79		1	0.574281352595158	0.269323749112331	0.784327594248508	81		1	0.574281352595158	0.269323749112331	0.784327594248508	81		0	0.11249050837023	0.0295583925732886	0.00437100618988886	49
0	0.0784010586741834	0.0458004573064995	0.0145738420087267	62		0	0.249734023917005	0.0843598181311852	0.113967741831383	61		0	0.249734023917005	0.0843598181311852	0.113967741831383	61		0	-0.0312569738096377	0.0182940197422921	0.0177014907275681	30
0	0.0275785840085214	0.0185108177548477	0.01687209894997	53		0	0.225041081164888	0.159573626816742	0.162623385648449	80		0	0.225041081164888	0.159573626816742	0.162623385648449	80		0	0.078475934433853	0.0411163007526704	0.0406198937319782	48
0	0.0583850714156715	0.026728842518266	0.00723472492824588	61		0	0.131556120246828	0.0464874045916134	0.111964494646282	56		0	0.131556120246828	0.0464874045916134	0.111964494646282	56		0	0.107870019880459	0.0666057799831494	0.00673656384760723	73
0	-0.104814608811454	0.00885427911722446	0.0045514847025378	35		1	0.562359772897731	0.451544054679684	0.444741925507241	80		1	0.562359772897731	0.451544054679684	0.444741925507241	80		0	-0.0140293519716578	0.0208214290672758	0.0184240451357518	33
1	0.310868121860891	0.282525421624835	0.0153213094699446	85		0	0.063799751828269	0.023319803450477	0.0587893134430746	49		0	0.063799751828269	0.023319803450477	0.0587893134430746	49		0	0.231528326475645	0.0898418829167432	0.046667601647667	76
0	0.107635937388421	0.0346585654471278	0.160455624006319	50		1	0.322614348814521	0.269033944064357	0.058114861163529	89		1	0.322614348814521	0.269033944064357	0.058114861163529	89		0	-0.289245959246906	0.00317938227786424	0.00284545786208347	7
0	-0.0467045926527188	0.033791199347381	0.00635550000194682	49		1	0.6438657439677	0.310804636514738	0.434727156210032	98		1	0.6438657439677	0.310804636514738	0.434727156210032	98		0	0.258402852991983	0.0975141989021143	0.0158338062193918	78
0	-0.0947140813985164	0.00895992939142696	0.000408676088081542	30		0	0.0762229362589806	0.0579530260065165	0.0136004459547757	48		0	0.0762229362589806	0.0579530260065165	0.0136004459547757	48		0	0.188337692299786	0.0512188711181005	0.167893497703388	63
1	0.295259993069801	0.144023288128325	0.074133679633995	87		1	0.325677136200862	0.0957370942046413	0.258088403821799	73		1	0.325677136200862	0.0957370942046413	0.258088403821799	73		1	0.438840912706217	0.204031484139662	0.129572545360105	79
0	0.722885477573379	0.0866621650968152	0.998261669182937	69		1	0.321862616109301	0.148318200006092	0.587097439218554	85		1	0.321862616109301	0.148318200006092	0.587097439218554	85		0	0.0953829775417209	0.0931475508212864	0.0313009125276378	66
0	-0.0473928992851174	0.0154382263519749	0.00167817313045091	50		1	0.253784790111032	0.169202972383007	0.0230181977355153	81		1	0.253784790111032	0.169202972383007	0.0230181977355153	81		0	-0.156118249085347	0.00696400083320689	0.00466196382041508	26
0	0.0625874485271519	0.0276562775194483	0.00893459317745316	58		0	0.0133414719497461	0.0317694027242176	0.0289358585556845	46		0	0.0133414719497461	0.0317694027242176	0.0289358585556845	46		1	0.210484886524858	0.130023309101564	0.0178861538277671	68
0	0.144725683819644	0.0459460600978749	0.117683095141307	50		0	0.19993317348576	0.0662145983152261	0.342327339951493	63		0	0.19993317348576	0.0662145983152261	0.342327339951493	63		0	0.417305393640968	0.129948473559196	0.223552137838474	75
0	0.123588415749609	0.0581121140059351	0.0703281246486987	62		0	0.0419930263191374	0.0275031671570421	0.0819271041386993	49		0	0.0419930263191374	0.0275031671570421	0.0819271041386993	49		0	0.0701974181295744	0.0387088241755492	0.0438329502704835	47
0	-0.149108083626921	0.00782693047913763	0.00708877356018821	23		0	0.0941635351030943	0.0520047177389977	0.0274264742594756	50		0	0.0941635351030943	0.0520047177389977	0.0274264742594756	50		0	0.12508931131938	0.049741170131833	0.0147313340136333	73
1	0.178724577283816	0.157770608078	0.0717433615133157	75		0	0.112961292304728	0.0809891571788237	0.0126906248937984	58		0	0.112961292304728	0.0809891571788237	0.0126906248937984	58		0	-0.168348550176267	0.00887307677222825	0.00844158676382433	14
0	0.0967756461001506	0.038452815742822	0.0152186210850192	67		0	0.159670406861674	0.059338415254773	0.0130388293813222	74		0	0.159670406861674	0.059338415254773	0.0130388293813222	74		0	0.224771595512679	0.13234491982475	0.0156067108322503	89
0	0.159807444062705	0.13543743584083	0.022457438933064	81		0	0.199584282033588	0.0373748081133187	0.109607271354358	69		0	0.199584282033588	0.0373748081133187	0.109607271354358	69		0	0.070294970506769	0.072448230968351	0.0149987380718737	66
0	0.267386077665687	0.132843293565012	0.0612497376296116	91		0	0.097300113145843	0.0325873230591117	0.0364743471398708	48		0	0.097300113145843	0.0325873230591117	0.0364743471398708	48		0	0.309411066951273	0.190334060012809	0.147640477944135	91
0	0.374479125402463	0.214597841211104	0.0682561858980644	88		0	0.143361083878418	0.0676861479177052	0.00905686680229986	63		0	0.143361083878418	0.0676861479177052	0.00905686680229986	63		0	0.081256307344702	0.0327862759212298	0.0154262794961057	51
0	0.265986119524115	0.165840767889092	0.0206751701039481	91		0	0.140105787250853	0.0635838405880663	0.11528788841888	65		0	0.140105787250853	0.0635838405880663	0.11528788841888	65		0	-0.274225730325187	0.00332144575444374	0.0039375830774732	4
0	0.00825718834761688	0.0202898745350572	0.00441821231551289	56		0	0.20855040154916	0.0725495776593899	0.0863028209961736	55		0	0.20855040154916	0.0725495776593899	0.0863028209961736	55		0	-0.0223803656518672	0.0339483972792588	0.00422320082971497	50
0	-0.097227925960801	0.0155246140543976	0.0247602228769373	37		0	0.145969095305798	0.04442173900201	0.0311947162461844	64		0	0.145969095305798	0.04442173900201	0.0311947162461844	64		0	0.1061530366328	0.0506914952205348	0.0243334360272314	53
0	0.430308978812037	0.114063561811019	0.0188676262124386	91		0	0.185604148561252	0.0902382451368344	0.0143551983535802	62		0	0.185604148561252	0.0902382451368344	0.0143551983535802	62		0	-0.0348101436822725	0.0157567744819258	0.087560802299966	27
0	0.225659527657388	0.166075995628083	0.0615390151639968	80		0	0.0258299477723001	0.0523079340267918	0.00474249130608284	47		0	0.0258299477723001	0.0523079340267918	0.00474249130608284	47		0	-0.00204563410916982	0.0227779656231493	0.0189436502819109	35
0	0.324652247739717	0.241025749306815	0.192516288638954	90		0	0.132463857534058	0.0525133878739759	0.101193893815904	53		0	0.132463857534058	0.0525133878739759	0.101193893815904	53		0	-0.177773952284748	0.00602837611701239	0.0125828058176592	5
1	0.470906052675824	0.210300369017151	0.596326049921308	83		0	0.0385310187019188	0.0224344542035323	0.00953332263152765	64		0	0.0385310187019188	0.0224344542035323	0.00953332263152765	64		1	0.562083321803075	0.128881826711805	0.894389178835118	69
1	0.648360693959748	0.332842268030296	0.988672951840179	81		0	0.0503701346983916	0.0344717361769606	0.123809448180859	54		0	0.0503701346983916	0.0344717361769606	0.123809448180859	54		0	0.247702773385932	0.170026625853884	0.015831390926943	89
0	0.22505391515887	0.0969688362475075	0.0684567846722477	87		0	0.0847302514254394	0.058027350009151	0.0176399111487732	52		0	0.0847302514254394	0.058027350009151	0.0176399111487732	52		0	0.34041272813495	0.118626314442015	0.589570862631606	77
0	0.119611141890104	0.0746150711109746	0.00646459124905267	76		0	0.431571915884332	0.113964362658906	0.736019459263947	82		0	0.431571915884332	0.113964362658906	0.736019459263947	82		0	0.346643846095051	0.189328098380296	0.0147469819272309	92
0	0.249242131014751	0.0844469490689806	0.00438666444772829	79		0	0.208689908794302	0.148831572282379	0.0412028572934466	64		0	0.208689908794302	0.148831572282379	0.0412028572934466	64		0	-0.00735202825469769	0.0265876772242619	0.0280576113277645	34
0	0.157830688563164	0.0566404738918041	0.0577128657253954	60		0	0.116940999048725	0.0454036512966559	0.00782087735049266	69		0	0.116940999048725	0.0454036512966559	0.00782087735049266	69		1	0.634405310808976	0.350337200348973	0.435887410461799	82
0	0.250641683987756	0.234064082861676	0.00847469406225927	93		1	0.393723785358738	0.154158996846513	0.0584340981595503	81		1	0.393723785358738	0.154158996846513	0.0584340981595503	81		0	0.440406648328888	0.256136489266053	0.180076681914791	89
0	-0.163638935930005	0.00912932535093207	0.0112929447019315	24		1	0.158430528149026	0.0387427521562492	0.0710776693237533	64		1	0.158430528149026	0.0387427521562492	0.0710776693237533	64		0	0.372737000476502	0.120536797916818	0.0383311354955677	72
0	0.167828791559303	0.0855827439360601	0.0128241267177934	70		0	0.118001244821884	0.0914635081260455	0.018560186469946	86		0	0.118001244821884	0.0914635081260455	0.018560186469946	86		0	0.387947897364156	0.15401168130846	0.0342075194426843	92
0	0.319315473813698	0.101139496929168	0.0354437944946476	82		1	0.335240304200356	0.113788669069222	0.624216988576851	80		1	0.335240304200356	0.113788669069222	0.624216988576851	80		0	-0.0539323265715235	0.0116766851331153	0.00935355263850807	40
0	0.147214255354912	0.0730856214480008	0.0413390490661869	72		0	0.143563992031581	0.0444171974648644	0.0130598737706639	55		0	0.143563992031581	0.0444171974648644	0.0130598737706639	55		0	0.232625070616933	0.119425370807664	0.0497287797598147	76
0	0.191163427619378	0.123259703604037	0.0250886762790827	76		0	-0.062392160455022	0.0153607683957467	0.0107495258095252	51		0	-0.062392160455022	0.0153607683957467	0.0107495258095252	51		0	0.134209132858462	0.158170846701936	0.00853800179860051	82
0	0.157299348884495	0.069827678798209	0.0827276974546422	58		0	-0.024608477321147	0.0310005680400935	0.0010725363353048	51		0	-0.024608477321147	0.0310005680400935	0.0010725363353048	51		0	0.163561306429214	0.0571375482338767	0.0176374704110216	82
0	0.279202912384177	0.155602026742658	0.0141328474585284	87		0	0.0195761077295511	0.0316129108721706	0.0157597482262009	40		0	0.0195761077295511	0.0316129108721706	0.0157597482262009	40		0	0.456706722731452	0.113246733835957	0.933835036325494	64
0	0.33092839670368	0.24287112112848	0.00756694667744789	98		1	0.348223649760784	0.172677671350098	0.205824449144952	71		1	0.348223649760784	0.172677671350098	0.205824449144952	71		0	0.279585166900484	0.136788702151707	0.0338735510676419	76
0	0.408378934103223	0.204511078494154	0.191294620510179	80		0	0.0886066096629625	0.0377366180402009	0.0134684829078256	57		0	0.0886066096629625	0.0377366180402009	0.0134684829078256	57		0	0.230891397637958	0.0881823405193354	0.022261761923183	78
0	0.00757104108767137	0.0350441784973981	0.0145435130483034	30		0	0.196375448277717	0.0594386415062903	0.0154583191921406	81		0	0.196375448277717	0.0594386415062903	0.0154583191921406	81		0	0.411748880782344	0.242793460313776	0.232656509075442	88
0	0.11858939126896	0.0758422558146004	0.0289298460668386	66		1	0.358468159792977	0.174835189827263	0.255987748329541	73		1	0.358468159792977	0.174835189827263	0.255987748329541	73		0	0.19995976562227	0.034221878928483	0.0564483689198402	67
0	0.209657978520245	0.0691832616961885	0.0396761653579365	63		1	0.35318066416837	0.271191506924794	0.012656414641158	90		1	0.35318066416837	0.271191506924794	0.012656414641158	90		1	0.450619154362496	0.266557935265687	0.0608348138175908	95
0	0.244489278110305	0.103281191269259	0.0197316983255184	83		1	0.241472598803479	0.107456408408468	0.0324874746814757	75		1	0.241472598803479	0.107456408408468	0.0324874746814757	75		0	-0.18558227325139	0.0056803096680145	0.0123554185910039	4
0	0.16693753518653	0.0509932536415479	0.00103489702532831	82		0	0.240724965291418	0.0967069305591527	0.00171309349872349	90		0	0.240724965291418	0.0967069305591527	0.00171309349872349	90		0	0.293871487997506	0.101790365134167	0.285097313969968	80
0	0.547099036378392	0.0413884410087757	0.991399097905939	68		0	0.225210737963399	0.0605901559164085	0.0887656857013026	90		0	0.225210737963399	0.0605901559164085	0.0887656857013026	90		0	-0.209188060426332	0.00474501443825382	0.0116923848136524	0
0	0.158085736702864	0.0699210258815663	0.0155283010661538	79		0	0.482043120530775	0.142904146858079	0.51754034094237	81		0	0.482043120530775	0.142904146858079	0.51754034094237	81		0	0.00808052529178025	0.0245702807385033	0.0193938941718147	36
0	-0.0146618908307468	0.0151354712092261	0.000767150649594439	37		0	0.181407617955346	0.0797129634711748	0.0408061683964746	78		0	0.181407617955346	0.0797129634711748	0.0408061683964746	78		0	0.00829422670770939	0.02460955021816	0.019403508226345	36
0	-0.125906833078153	0.0130114762969818	0.0155028073942044	25		0	0.227060608043449	0.0729932742028435	0.0603265612923472	74		0	0.227060608043449	0.0729932742028435	0.0603265612923472	74		1	0.513324044744574	0.066019079431264	0.948943008273359	58
0	0.230969692189627	0.121114308268509	0.0384080205457445	80		0	0.254830256595917	0.0793164441529716	0.326237964770274	62		0	0.254830256595917	0.0793164441529716	0.326237964770274	62		0	0.0904155444421709	0.0628244676968436	0.0218744842753465	58
0	0.445285903547591	0.23034399438054	0.320222403201679	60		0	0.318333494420735	0.147708168361568	0.0476831410219327	87		0	0.318333494420735	0.147708168361568	0.0476831410219327	87		0	-0.207560641951179	0.00480426044591052	0.0117369447964457	1
0	0.0449365607957612	0.0404453603404384	0.0535486026735247	45		0	-0.0764112870602033	0.00632084118098136	0.000560433197091508	47		0	-0.0764112870602033	0.00632084118098136	0.000560433197091508	47		0	0.246421982604208	0.107624471062076	0.0230359558217326	86
0	0.275454128208047	0.153010977551637	0.0196059802612427	89		0	0.0927653661337475	0.0518921989016043	0.064464167770309	57		0	0.0927653661337475	0.0518921989016043	0.064464167770309	57		0	-0.126043241431371	0.00525610415626987	0.0412574113746121	15
0	0.406049517848047	0.219739713638807	0.0489927278495175	92		0	0.254470882580435	0.111614539334847	0.0170047776550666	79		0	0.254470882580435	0.111614539334847	0.0170047776550666	79		0	0.323162778165902	0.183819667773132	0.0527626074524661	87
0	0.256463387321996	0.136129549600071	0.0139061558628888	90		0	0.256625585732298	0.127789651689741	0.0332578842176089	85		0	0.256625585732298	0.127789651689741	0.0332578842176089	85		0	0.301907405514704	0.150648222980715	0.0160116297304616	87
0	0.133838605371073	0.238477132221484	0.000745164648599089	89		0	0.077227805579148	0.0566670704416806	0.0282468485617031	52		0	0.077227805579148	0.0566670704416806	0.0282468485617031	52		0	0.226607626115227	0.0392361977548288	0.00929812015160572	64
0	0.248762225506101	0.0828898466453102	0.21340026931208	60		1	0.494216446003018	0.183301772438498	0.367206527297988	90		1	0.494216446003018	0.183301772438498	0.367206527297988	90		0	-0.291144506429153	0.00537844317588537	0.0021346529471808	3
1	0.440443320922586	0.184052205186504	0.425024671094967	95		0	0.255800393013625	0.0912055622567155	0.0204778724608395	90		0	0.255800393013625	0.0912055622567155	0.0204778724608395	90		0	0.333798419940559	0.183474523885832	0.0638643862914329	86
0	0.106795816999109	0.0589728276325808	0.0470066019710065	59		0	0.162974544883872	0.0675977255142894	0.12419506913755	60		0	0.162974544883872	0.0675977255142894	0.12419506913755	60		0	0.39988908222102	0.243439779858618	0.193377833931207	91
0	0.0897379774846895	0.037859985173526	0.0306239594339431	40		1	0.404640471448483	0.162580282956255	0.14772964468797	85		1	0.404640471448483	0.162580282956255	0.14772964468797	85		1	0.813800857372043	0.229520752492732	0.578289538664328	91
0	-0.0850060993476464	0.0177353189218033	0.0152060371178444	37		0	-0.00916271027655278	0.0367172517761836	0.0330115223635349	60		0	-0.00916271027655278	0.0367172517761836	0.0330115223635349	60		0	0.0187351262970669	0.037784804282147	0.0151970107700635	48
0	0.268437154954982	0.142854754507485	0.0363453427836274	82		1	0.284215547340044	0.150639351319402	0.0255558757956203	89		1	0.284215547340044	0.150639351319402	0.0255558757956203	89		1	0.384588725765736	0.169488355586364	0.363399246584997	87
0	0.201659850864135	0.0676587235521868	0.117475171610569	76		0	0.155480447564888	0.0742392600360521	0.109172664280343	61		0	0.155480447564888	0.0742392600360521	0.109172664280343	61		0	-0.143220077186052	0.00784111111348341	0.0136396480175571	11
0	0.331138513581023	0.113959690392206	0.0291894546756806	88		0	0.278708442115481	0.126625865096736	0.104914837593611	71		0	0.278708442115481	0.126625865096736	0.104914837593611	71		0	0.33500207970248	0.324911055708796	0.0148196701665159	93
0	0.0816083970151476	0	0.00484254770781924	63		0	0.345053243858137	0.119102933266155	0.0522549991052564	84		0	0.345053243858137	0.119102933266155	0.0522549991052564	84		0	0.454094265288815	0.238469212126603	0.0495362392563683	93
0	0.311139744640018	0.270467650288211	0.0238406457610215	97		0	-0.0585829358168523	0.01332206142557	0.00044298573000022	50		0	-0.0585829358168523	0.01332206142557	0.00044298573000022	50		0	0.0555525645257694	0.0264895161201056	0.0448590169508913	57
0	0.518241131379155	0.216679832576908	0.86315710060299	75		0	0.125494660414424	0.041145033006605	0.210604429998277	48		0	0.125494660414424	0.041145033006605	0.210604429998277	48		0	-0.215667285770623	0.00528555526649937	0.0539281293290081	0
0	0.206857337401346	0.109765840565704	0.0244459521757577	83		0	0.0805822096111071	0.0372700544634635	0.0168498033461708	52		0	0.0805822096111071	0.0372700544634635	0.0168498033461708	52		0	0.344387898840846	0.0904407335566502	0.487325528611772	68
0	0.437282071423176	0.294726174060592	0.204131769755866	92		0	0.108920879077895	0.0363605547762801	0.0578886619467961	51		0	0.108920879077895	0.0363605547762801	0.0578886619467961	51		0	0.255910204403579	0.154033582836789	0.0490520029767797	79
1	0.466188897695202	0.364695876920625	0.193217609287337	82		0	0.289601837607102	0.119924661399616	0.202277880624606	70		0	0.289601837607102	0.119924661399616	0.202277880624606	70		0	0.0815433957053814	0.0480267477120792	0.00519594058453845	64
0	-0.0490048217248242	0.0287063749156978	0.0354267360254995	41		0	0.0512247640635184	0.0506456889470817	0.00192449003927759	65		0	0.0512247640635184	0.0506456889470817	0.00192449003927759	65		0	-0.148913404101368	0.0086265402332953	0.0733206578002787	5
0	0.205671869339441	0.116786266758914	0.0214792231593037	75		0	0.212666075016811	0.0952471314155016	0.0115366012440412	74		0	0.212666075016811	0.0952471314155016	0.0115366012440412	74		0	0.139071030744937	0.111137066487301	0.0076527066146709	86
0	-0.130967675201796	0.00953974436395983	0.00199548849515873	34		1	0.306532998507619	0.215629815333262	0.137501341899593	83		1	0.306532998507619	0.215629815333262	0.137501341899593	83		0	0.10580315941175	0.0395788124402645	0.0144278208439643	60
0	0.182084773085026	0.0842388707770464	0.0396475606706003	63		1	0.529216870756774	0.173006285587619	0.969467585985007	76		1	0.529216870756774	0.173006285587619	0.969467585985007	76		0	0.558694291532486	0.142911127139087	0.717496679044622	45
0	0.109097362311813	0.0554950576781545	0.0236236470235059	61		0	-0.0161174525395688	0.0246642382789513	0.0376160771398053	43		0	-0.0161174525395688	0.0246642382789513	0.0376160771398053	43		0	-0.195617858810915	0.00526521775251094	0.00385207124723378	19
0	0.248388041279042	0.197164217086573	0.000604777485325035	98		0	0.41799070904135	0.144820367449891	0.821268744661233	55		0	0.41799070904135	0.144820367449891	0.821268744661233	55		0	0.0839896016554772	0.0304888120256597	0.0886144745145444	41
0	0.272143261293947	0.260177016813628	0.00908519931764453	78		0	0.132802987939976	0.0761510482171247	0.108290022906915	61		0	0.132802987939976	0.0761510482171247	0.108290022906915	61		0	0.085607790419622	0.0527185621348929	0.00569732973356505	63
0	0.0792832808286553	0.0508836275419959	0.000340901165721367	66		0	0.232454162222129	0.0987064902148901	0.0682827054420886	82		0	0.232454162222129	0.0987064902148901	0.0682827054420886	82		0	-0.354738919790382	0.00195446545689281	0.00121195377974358	0
0	0.354639905494852	0.255987958884811	0.0565143846802257	73		1	0.136808283642867	0.031243827392742	0.0789893972659791	52		1	0.136808283642867	0.031243827392742	0.0789893972659791	52		0	0.187272090508145	0.0475565664529816	0.0113927753455379	72
1	0.283752140506031	0.191109406783833	0.024226702850718	69		0	0.197141274281562	0.0178847608712721	0.0367534489050733	31		0	0.197141274281562	0.0178847608712721	0.0367534489050733	31		1	0.431220719439765	0.273000302692365	0.220323798951939	85
1	0.657986869038944	0.328575564399298	0.857437311717073	82		1	0.305671215134775	0.251225238322627	0.284266034593999	83		1	0.305671215134775	0.251225238322627	0.284266034593999	83		0	0.0207300791227004	0.0158451885088478	0.032131459639959	51
0	-0.0623595069732827	0.0171708314142175	0.0024254207037647	40		0	0.0197553631467585	0.0351820613560546	0.00961263355940715	51		0	0.0197553631467585	0.0351820613560546	0.00961263355940715	51		0	0.332882843034526	0.245685875500058	0.0690390568272373	92
1	0.436595063948384	0.365965880951325	0.0154781180960037	81		0	0.258818450692953	0.14236950844275	0.0247742783971097	80		0	0.258818450692953	0.14236950844275	0.0247742783971097	80		0	0.199385273458465	0.0693244374201108	0.161638548532777	60
0	-0.235357353673359	0.00500300768595422	0.0133666063798567	0		0	0.0909845577494324	0.0631489315335068	0.0259407784343672	45		0	0.0909845577494324	0.0631489315335068	0.0259407784343672	45		0	-0.0594911313434089	0.00714491927955057	0.00697757884012186	44
0	0.327533163096071	0.259813638223949	0.00878195996694587	89		0	0.38514138355036	0.1743952409823	0.266911768413253	75		0	0.38514138355036	0.1743952409823	0.266911768413253	75		0	0.109161295026264	0.0518121257487144	0.0245029183663801	53
0	0.246978996376618	0.196441798840119	0.00719544239242512	83		0	0.128571044930479	0.0811308513970736	0.0163919212541387	64		0	0.128571044930479	0.0811308513970736	0.0163919212541387	64		0	-0.204207173578137	0.00492867449333899	0.0118292951703588	1
1	0.139201450067822	0.0722687820956221	0.0218278731213717	63		0	0.448231152267244	0.156975672337777	0.260133013016321	80		0	0.448231152267244	0.156975672337777	0.260133013016321	80		0	0.0672074226220634	0.039364280174987	0.0542448851733934	47
0	0.170419312134051	0.1095376539175	0.0127683669371182	66		1	0.60289253441494	0.400920010557841	0.0534957204233201	87		1	0.60289253441494	0.400920010557841	0.0534957204233201	87		0	0.139278843794272	0.0649024043093303	0.0473343853930284	58
0	0.225666893556065	0.113994786894281	0.0586443425002633	64		0	0.242666159468327	0.121743248868359	0.0806158386353572	80		0	0.242666159468327	0.121743248868359	0.0806158386353572	80		0	0.39624195482229	0.178575899844211	0.0375052628095829	88
0	0.322081891029718	0.231298995995162	0.0769985001238452	83		0	0.309487895274757	0.167737313927201	0.289879590122275	79		0	0.309487895274757	0.167737313927201	0.289879590122275	79		0	0.22106516974599	0.0653170900691622	0.0148005870264644	82
0	0.356232000327452	0.243774945473438	0.1209589977203	65		0	0.0829512395183205	0.0484832925772068	0.041716940239113	57		0	0.0829512395183205	0.0484832925772068	0.041716940239113	57		0	0.237750691475713	0.0506033731473816	0.0290336140540156	52
0	-0.174233196831255	0.00832899234277759	0.00405338260003654	0		0	0.254659436047515	0.179860582353134	0.00790745886074561	95		0	0.254659436047515	0.179860582353134	0.00790745886074561	95		1	0.409702785059378	0.230379798133065	0.077228644612389	96
1	0.321936468331165	0.120222256443467	0.13322293098177	85		1	0.251496121873498	0.113195095765453	0.0523335014369518	85		1	0.251496121873498	0.113195095765453	0.0523335014369518	85		0	0.133693812946421	0.0616366806714432	0.012361215883129	77
0	0.315295734043619	0.222916400983479	0.120713701350032	79		0	0.306456407024298	0.211953820792005	0.0560248808108653	84		0	0.306456407024298	0.211953820792005	0.0560248808108653	84		0	0.155531388747182	0.0638311010535578	0.0199771026293677	60
0	0.308621945610642	0.261938314695859	0.177990040197637	85		0	0.195007449938534	0.113475229474744	0.00185707649810765	80		0	0.195007449938534	0.113475229474744	0.00185707649810765	80		0	0.506163225582483	0.156392483664859	0.796123132233131	87
0	0.249115287494878	0.190148331006156	0.0802208657886547	79		0	0.209097874219089	0.0440471785967108	0.00766907287131723	76		0	0.209097874219089	0.0440471785967108	0.00766907287131723	76		0	-0.0930548249960572	0.0204574053205434	0.00380746175764119	40
0	0.202094036924714	0.108355190220736	0.0621049758093818	59		0	-0.0908801195197536	0.0188074470231908	0.0220473267939537	28		0	-0.0908801195197536	0.0188074470231908	0.0220473267939537	28		1	0.314585148297776	0.185894527235499	0.0146878518889551	105
1	0.263863469215633	0.0958444804967923	0.166259010037241	71		0	0.078564500492085	0.0434420470890037	0.0108753681038134	63		0	0.078564500492085	0.0434420470890037	0.0108753681038134	63		0	0.187998237919403	0.09024538527877	0.00805978760334666	68
0	0.278487546828719	0.162410785755506	0.0490274936253592	83		1	0.27683080472439	0.188378306571856	0.022659256403556	87		1	0.27683080472439	0.188378306571856	0.022659256403556	87		0	0.377332750735229	0.194906198713395	0.22438584312329	83
0	0.231498029212941	0.159727472491276	0.154349464154922	70		0	0.407486591818567	0.138808372443068	0.14886146047849	74		0	0.407486591818567	0.138808372443068	0.14886146047849	74		0	0.137675011047401	0.122093152942555	0.0212060538380975	70
1	0.453727857833243	0.245692591868404	0.414355212608935	91		1	0.327424044635326	0.20031566652853	0.449887087808884	86		1	0.327424044635326	0.20031566652853	0.449887087808884	86		0	0.192375849074639	0.0942913088981187	0.0531396911621956	74
0	0.172145872749973	0.140046387235971	0.0719226451856858	75		0	0.529510290444041	0.218386131602687	0.687345464861034	84		0	0.529510290444041	0.218386131602687	0.687345464861034	84		0	0.16675857171879	0.176945339020036	0.0106757707024808	83
0	0.123440313315001	0.0655956446383033	0.00304823420170388	64		1	0.570555358700109	0.413794796571456	0.475532080166683	99		1	0.570555358700109	0.413794796571456	0.475532080166683	99		0	0.232977076680954	0.111068613985057	0.0269223846640866	78
0	0.249342223417843	0.171356399279464	0.0284815730748062	80		0	0.221209024842182	0.0898021784412643	0.0809497778666366	72		0	0.221209024842182	0.0898021784412643	0.0809497778666366	72		0	0.156536438657908	0.0564068761656329	0.0147984164675124	70
1	0.415711803101146	0.205266934055035	0.188373751983445	91		0	0.118772276442233	0.0425354469027463	0.160937390556807	39		0	0.118772276442233	0.0425354469027463	0.160937390556807	39		0	0.367455543339297	0.19522155724662	0.0637623995256133	88
0	0.690098300896376	0.353181240894258	0.979381733521202	98		0	0.432998123311945	0.0398915825185716	0.204114183686951	48		0	0.432998123311945	0.0398915825185716	0.204114183686951	48		0	0.280541788941657	0.0785318311051306	0.0857756546790075	39
0	0.0605087607225764	0.0303434953453597	0.00909093580476912	42		0	0.0843381848416753	0.091398763261968	0.00294548487680518	68		0	0.0843381848416753	0.091398763261968	0.00294548487680518	68		0	-0.0494238290918551	0.0121765128872804	0.013349468088464	47
0	0.222745799778817	0.151474499961099	0.000202688438731918	82		0	-0.0114783125231196	0.023695507815394	0.0372103532535918	43		0	-0.0114783125231196	0.023695507815394	0.0372103532535918	43		0	0.334612480556812	0.194044358121934	0.0564867501401211	78
0	0.121264019541625	0.0652457415285239	0.0112422437541345	59		1	0.386951970377941	0.170887608336541	0.0622424760916729	92		1	0.386951970377941	0.170887608336541	0.0622424760916729	92		0	0.111948522369062	0.0238537127928324	0.037509475094751	52
0	-0.1738230108056	0.00807941335655424	0.00423222624964677	24		0	0.316524233161134	0.0970912190846615	0.0331170907108942	70		0	0.316524233161134	0.0970912190846615	0.0331170907108942	70		0	-0.252171340382302	0.0035103732831483	0.0060686773203331	9
0	0.353830223320769	0.262854957925694	0.0504948349697859	80		0	0.147871782555529	0.0575666884143583	0.0313431731363943	71		0	0.147871782555529	0.0575666884143583	0.0313431731363943	71		0	0.142989039089279	0.0719113142283172	0.0257291310451738	61
0	0.320216362407919	0.0772074535558911	0.070152123853769	58		1	0.4048107178995	0.130520489051471	0.232215028995109	75		1	0.4048107178995	0.130520489051471	0.232215028995109	75		0	-0.0957447652544845	0.0142309865666919	0.0217254407555093	24
0	0.40240183410166	0.259135534595208	0.0760172697314731	82		0	-0.00200199306496426	0.0267585776978416	0.0249817430272064	53		0	-0.00200199306496426	0.0267585776978416	0.0249817430272064	53		0	0.0570517175294109	0.0398940797165199	0.00270230434829006	57
0	-0.0375160643154756	0.0289034600596081	0.00140318015056682	42		0	0.248834935721484	0.0706124150145021	0.170591238663243	74		0	0.248834935721484	0.0706124150145021	0.170591238663243	74		0	0.328635245440663	0.145801653399534	0.27217934956151	74
0	-0.0187252743106403	0.0190932438233844	0.0065999595920682	49		0	0.263616256321495	0.0912048049164152	0.0116747908136318	80		0	0.263616256321495	0.0912048049164152	0.0116747908136318	80		0	0.00663215247397593	0.010125629543024	0.01062799565835	40
0	0.720364601255492	0.257354714229288	0.414821205835927	94		0	0.198346116477846	0.103945061548447	0.116300479160325	67		0	0.198346116477846	0.103945061548447	0.116300479160325	67		0	0.282945241234981	0.190668438212766	0.035612816778435	87
0	-0.114403267632674	0.00804057533716483	0.00696803274846879	28		0	0.232735871497648	0.141401502385511	0.0422098160400921	90		0	0.232735871497648	0.141401502385511	0.0422098160400921	90		0	-0.0372975765559686	0.0241423284216078	0.0331560347646898	36
0	0.157124062132937	0.0126230321214315	0.129224846051523	43		1	0.282108497954174	0.146624730531544	0.0340320832419447	79		1	0.282108497954174	0.146624730531544	0.0340320832419447	79		0	-0.34380862229887	0.00472128341842988	0.00115817973959691	0
0	0.0571071806178117	0.0404928557964147	0.00951222305555078	45		0	0.294640730844115	0.253922087006756	0.0217072231946452	95		0	0.294640730844115	0.253922087006756	0.0217072231946452	95		0	0.262975203038442	0.0439704677513233	0.664131886170973	44
0	0.258828707510345	0.179551061571275	0.055773099454229	86		0	0.169940389236473	0.0433896591402094	0.485611744365674	55		0	0.169940389236473	0.0433896591402094	0.485611744365674	55		1	0.357403288826592	0.169278530813571	0.0620766362037546	81
0	0.212590846238032	0.0664814942551908	0.260143101567669	51		1	0.416687655112229	0.152308626230552	0.453318371192648	72		1	0.416687655112229	0.152308626230552	0.453318371192648	72		0	-0.170359284068193	0.0120279168043253	0.00249835294117681	27
0	0.306174054404458	0.105967179258146	0.269450967303537	67		0	0.365622879302936	0.178811426461249	0.194730597086478	88		0	0.365622879302936	0.178811426461249	0.194730597086478	88		0	0.0208204173952483	0.027021316523883	0.0199752753402406	39
0	0.161854593903939	0.0693530898345759	0.0205673840786913	63		0	0.13425538003512	0.0285730192010435	0.498231028193343	45		0	0.13425538003512	0.0285730192010435	0.498231028193343	45		0	0.358915898981954	0.0828286028022614	0.53947081020381	61
0	0.129026979796715	0.0780664832944108	0.0145269688673376	74		0	0.121907517639039	0.0670440749526752	0.00636442315209404	77		0	0.121907517639039	0.0670440749526752	0.00636442315209404	77		0	0.0916793981128658	0.0334732757318201	0.0120435825327875	69
0	0.428089346548574	0.275266354714014	0.249632375138359	95		1	0.220709090809408	0.121402587166221	0.0732702102289857	78		1	0.220709090809408	0.121402587166221	0.0732702102289857	78		0	-0.159921664769437	0.00690583411406634	0.0131183199605921	8
0	0.337782416504434	0.111889065291623	0.568658040039896	68		0	0.183581880258705	0.0577393100136398	0.0391836425828163	67		0	0.183581880258705	0.0577393100136398	0.0391836425828163	67		0	0.218045074678552	0.0607587932660316	0.030390402298471	70
1	0.202394809275215	0.117338909934669	0.0232157262844021	81		0	0.297349108658104	0.141206841442373	0.504602390822115	67		0	0.297349108658104	0.141206841442373	0.504602390822115	67		0	0.283247167171061	0.12852949206911	0.0244080330631846	93
0	-0.0181425804679337	0.0147340750169948	0.00793949114366493	43		0	0.224027509856612	0.129724730865834	0.234521130835873	71		0	0.224027509856612	0.129724730865834	0.234521130835873	71		0	0.10259745130637	0.0452880019012822	0.00995404929096539	44
0	0.127638653124408	0.0902615142676194	0.096396486701652	67		0	0.221355580004333	0.136507835898671	0.0546628706677023	75		0	0.221355580004333	0.136507835898671	0.0546628706677023	75		1	0.522856781084099	0.139722759473791	0.0118938478316491	89
0	0.0348013706452501	0.0162482825736426	0.00323498126664981	56		1	0.383554971702079	0.206741969178674	0.440486999011954	67		1	0.383554971702079	0.206741969178674	0.440486999011954	67		0	-0.0754602897660579	0.0131075411207139	0.0159724594221029	23
0	-0.166395118032125	0.00367410565126029	0.0128311663459121	30		1	0.339613300875416	0.199177347304695	0.169204319531891	87		1	0.339613300875416	0.199177347304695	0.169204319531891	87		0	0.113972979952282	0.0547636351602203	0.0192832165427855	66
0	0.562348954345373	0.124048923728859	1.07450599141007e-10	90		0	0.189291231244372	0.0872595006177277	0.125601951166133	68		0	0.189291231244372	0.0872595006177277	0.125601951166133	68		0	0.221438033236928	0.0834757590543905	0.00818154252679833	65
0	0.526600681712497	0.211645544844542	0.00644746495040279	94		0	0.305131375536857	0.186387094506001	0.1285365173428	89		0	0.305131375536857	0.186387094506001	0.1285365173428	89		0	0.358224666531903	0.268519850786381	0.0650514106576424	89
0	0.22825548089558	0.0154302448658439	9.81377887293332e-05	59		0	0.201990092768566	0.099006047505902	0.101283336349482	60		0	0.201990092768566	0.099006047505902	0.101283336349482	60		1	0.413094730631619	0.266345482187361	0.0409244153510356	80
0	0.307897021871728	0.0681121145679496	1.67397126821317e-05	93		0	0.203053019439769	0.0670801536439154	0.428465204668781	48		0	0.203053019439769	0.0670801536439154	0.428465204668781	48		1	0.620022888892269	0.474653449378173	0.446560475702892	73
0	0.240247438105913	0.0601022565349442	0.000152170034378099	48		0	0.15757829382849	0.0447896401285234	0.110291510156569	60		0	0.15757829382849	0.0447896401285234	0.110291510156569	60		0	0.401620843235706	0.113934001152773	0.0609966353760537	70
0	0.138174779398194	0.0174159432250807	7.68308185885303e-08	51		0	0.48442573617404	0.387504993040293	0.153188631504502	86		0	0.48442573617404	0.387504993040293	0.153188631504502	86		0	0.18012886073164	0.172915915176163	0.00984445123789771	86
0	0.166670812703325	0.0746281069287823	0.0606624548737862	47		0	0.0474063719595877	0.0404335303397157	0.00910426874471176	38		0	0.0474063719595877	0.0404335303397157	0.00910426874471176	38		0	-0.073211214362927	0.00781282635439163	0.0254322056412678	22
0	0.123173143623577	0.0975102335335293	0.022179451414923	73		0	0.357134526033755	0.200656251330416	0.134065958633936	78		0	0.357134526033755	0.200656251330416	0.134065958633936	78		0	0.174830012825601	0.0939321129498197	0.0157690934359868	79
0	0.34369253640917	0.267598826995259	0.020920364574298	95		0	0.338139625327077	0.159678320557573	0.175923819987836	77		0	0.338139625327077	0.159678320557573	0.175923819987836	77		0	0.283105260594179	0.204258476389804	0.0488320280344913	71
0	-0.0865328687371907	0.013515212712144	0.000997500492887562	30		1	0.393944259238334	0.266148265532506	0.335590502133542	86		1	0.393944259238334	0.266148265532506	0.335590502133542	86		0	0.19207902384054	0.0705601755180306	0.0157344324699214	74
0	0.0915501522158926	0	0.0036751115314082	54		0	0.0758880324096759	0.0515826003963818	0.0350239247345617	48		0	0.0758880324096759	0.0515826003963818	0.0350239247345617	48		0	-0.108012228780215	0.0207615874053998	0.0127011622281245	35
1	0.197075208038654	0.0978278606753723	0.00432421995028812	75		0	0.00292104030937202	0.0230190000497684	0.00832559839422807	56		0	0.00292104030937202	0.0230190000497684	0.00832559839422807	56		0	0.0377028292536504	0.0306380737412605	0.0207720656698113	41
0	-0.0251863450212917	0.0275695302411355	0.0123178693298211	34		1	0.682361238517174	0.344642472820277	0.71589977214692	64		1	0.682361238517174	0.344642472820277	0.71589977214692	64		0	0.508622803262636	0.0559640845895703	0.995495074609428	58
0	0.0843100022575723	0.0636723595870238	0.0128617803870944	41		0	0.505097982855825	0.118899656525911	0.980167358040422	63		0	0.505097982855825	0.118899656525911	0.980167358040422	63		0	0.0157244605538612	0.0260135997868151	0.0197407017450212	38
1	0.467681622479534	0.269671821934234	0.667764201568769	92		0	0.0106311993734872	0.0333046270409634	0.00392762142563791	54		0	0.0106311993734872	0.0333046270409634	0.00392762142563791	54		0	-0.145357091345343	0.00771476126112204	0.0135718193805158	11
0	0.00305419834092913	0.0263899254862637	0.00303241200211968	40		0	0.232768218589266	0.0647983516861014	0.625001279565711	51		0	0.232768218589266	0.0647983516861014	0.625001279565711	51		0	-0.0280843297116128	0.0187357008960727	0.0178324334031547	30
0	0.330824335140687	0.190065181535271	0.0311073433398039	93		0	0.14909368913637	0.0809049496104386	0.0870954316520946	60		0	0.14909368913637	0.0809049496104386	0.0870954316520946	60		0	0.257945606445883	0.0955541643424618	0.068553022002667	84
0	0.226729073472875	0	0.00159314642648089	91		0	0.194918623531026	0.0733353854790338	0.0482065603821197	61		0	0.194918623531026	0.0733353854790338	0.0482065603821197	61		0	0.0553666636810458	0.0251128208249415	0.00593300333257008	60
1	0.340894467564397	0.291505246174534	0.0306503911318623	87		0	0.262529577742535	0.0622218228982996	0.0992343633296686	70		0	0.262529577742535	0.0622218228982996	0.0992343633296686	70		0	0.0139323327533518	0.0230275939051995	0.0126014115136768	41
1	0.288293052832272	0.149590705490778	0.0203315582581863	89		0	0.249669693119553	0.084666386474634	0.0705986978950819	71		0	0.249669693119553	0.084666386474634	0.0705986978950819	71		0	0.337556653218343	0.210913137192128	0.0684911129713089	87
0	0.0443562142752012	0.0215716965002181	0.0191843455250649	43		0	0.117479040260372	0.0542987696126279	0.0795320631925791	60		0	0.117479040260372	0.0542987696126279	0.0795320631925791	60		0	0.228987568944201	0.164094426329794	0.0447171855650667	86
0	0.173243722483083	0.0880815829610508	0.00639260743581328	70		0	0.153042812384909	0.0738853617737307	0.0213900388849893	66		0	0.153042812384909	0.0738853617737307	0.0213900388849893	66		1	0.293943204766372	0.180417627751332	0.022155643702172	92
0	0.261140192996359	0.151852557106193	0.101002052155849	69		0	0.212716443056324	0.0708459019916343	0.0920780427314077	68		0	0.212716443056324	0.0708459019916343	0.0920780427314077	68		0	0.310727838843829	0.155891551137414	0.0313948057760055	89
0	0.149843053684016	0.0559649136323319	0.00805895390336521	66		0	0.192269141016888	0.0878515263589433	0.0106267640670833	80		0	0.192269141016888	0.0878515263589433	0.0106267640670833	80		0	0.133051306395603	0.0314849857582821	0.163798896686596	36
0	0.174159591758697	0.0903198141009157	0.00765904145646077	65		0	0.197987549411879	0.139824506374334	0.0134142070369172	84		0	0.197987549411879	0.139824506374334	0.0134142070369172	84		0	0.168455205121323	0.088850889675009	0.072729841591292	61
0	-0.0175013576033923	0.036481035056216	0.00407622293677287	45		1	0.441846198150621	0.402833371312432	0.0711021687323734	83		1	0.441846198150621	0.402833371312432	0.0711021687323734	83		0	0.366497333785705	0.206320641206115	0.0494924743809346	90
0	0.105447034681423	0.0543151750565709	0.0274691052216412	52		0	0.16053747046964	0.0833097572450593	0.0926204461092507	65		0	0.16053747046964	0.0833097572450593	0.0926204461092507	65		1	0.3529247147254	0.327870379544212	0.016166666018546	97
1	0.39404904010714	0.149860658293777	0.102548362481265	76		1	0.295208887653959	0.167829421617448	0.0126699437353222	86		1	0.295208887653959	0.167829421617448	0.0126699437353222	86		0	0.327061079274087	0.0959879093301562	0.0602759025542411	90
0	0.280248051734952	0.202429034861023	0.027470975302241	88		0	0.158126511900234	0.0782700635154545	0.0587286976503796	71		0	0.158126511900234	0.0782700635154545	0.0587286976503796	71		1	0.383402002962993	0.20040672240564	0.0323610403272083	89
0	0.205720021118903	0.12226798914491	0.169886775656787	57		1	0.684077626165791	0.197885407107962	0.573933536967079	76		1	0.684077626165791	0.197885407107962	0.573933536967079	76		0	-0.173445508684158	0.00431877994216858	0.00829394483276518	26
0	0.247883410055368	0.153035241648498	0.191300808626137	72		1	0.523825667796856	0.0886938442510879	0.277494383463364	72		1	0.523825667796856	0.0886938442510879	0.277494383463364	72		0	0.141205027767033	0.0729693091374557	0.020228917810487	51
0	0.117009454443412	0.0934010891490045	0.0082661253706386	57		0	0.14617276694964	0.0976444749815946	0.0568911497690316	58		0	0.14617276694964	0.0976444749815946	0.0568911497690316	58		0	0.397171344440929	0.22566440846852	0.227364739431586	88
0	0.120485842489479	0.0761439630347045	0.11110396315723	65		0	0.209925467009197	0.0884301218991306	0.162014505848798	77		0	0.209925467009197	0.0884301218991306	0.162014505848798	77		0	0.28909976937912	0.227838275121797	0.034664115184648	88
0	0.155810295859605	0.0679589335358407	0.0257298478272563	60		0	0.000177383488094522	0.0293753964259087	0.00515812327358668	45		0	0.000177383488094522	0.0293753964259087	0.00515812327358668	45		0	0.191391562378532	0.111377783995288	0.0342940384540537	86
0	0.278048087790463	0.186994858806742	3.87401407887747e-12	86		0	0.192911026289545	0.0565209148929627	0.0404553513764355	61		0	0.192911026289545	0.0565209148929627	0.0404553513764355	61		1	0.584652299753111	0.197910922353809	0.746199243305308	81
0	0.269805188593555	0.200321747016898	0.0379219340771823	76		0	0.323012492811952	0.172526165200053	0.0393805265623656	76		0	0.323012492811952	0.172526165200053	0.0393805265623656	76		0	-0.148234211246763	0.0193603495743902	0.00157867108794654	37
0	0.26595027687196	0.149765024175185	0.0654542035289299	81		0	0.28929703493984	0.0588113682192856	0.813771343419652	60		0	0.28929703493984	0.0588113682192856	0.813771343419652	60		0	0.277933340599841	0.115936423273745	0.0860511463299384	63
1	0.117910476522533	0.051667068995285	0.0493220125911664	60		0	0.122425151651389	0.042126654182521	0.165644036300051	48		0	0.122425151651389	0.042126654182521	0.165644036300051	48		0	0.299987111542553	0.140803740715481	0.14962132289424	74
0	0.458080489465711	0.428670208096994	0.149241839233214	98		0	0.690351360191918	0.242892656422618	0.770390251293073	69		0	0.690351360191918	0.242892656422618	0.770390251293073	69		0	0.375943502681777	0.219819586783059	0.114918555413465	92
0	0.396672810715605	0.349640687290456	0.106674972422559	84		0	0.273254684087756	0.158409304016967	0.0959020007037832	72		0	0.273254684087756	0.158409304016967	0.0959020007037832	72		1	0.546089401303849	0.250567500178953	0.380097310296966	91
0	0.312350505707264	0.235037000565115	7.16662028789534e-44	77		0	0.104723694965938	0.0559871926992909	0.0494606612667604	66		0	0.104723694965938	0.0559871926992909	0.0494606612667604	66		0	0.0782074357886421	0.0192262649696171	0.0236188623989882	56
1	0.497872718957753	0.342058379404518	0.422067721788842	91		0	0.0645373621467862	0.0451791172390613	0.00609526018395077	51		0	0.0645373621467862	0.0451791172390613	0.00609526018395077	51		0	0.194521871977967	0.114313120447457	0.0141151595822603	76
0	0.23358787622958	0.149249572129903	0.0962732317361716	69		0	0.207118460942458	0.10099721012454	0.0625384652041854	68		0	0.207118460942458	0.10099721012454	0.0625384652041854	68		0	0.147261129537023	0.0532507401084841	0.0396541887123186	77
0	0.283331721986716	0.223629614461102	0.037998368692501	86		1	0.494460940875314	0.159203052306525	0.977672138486207	66		1	0.494460940875314	0.159203052306525	0.977672138486207	66		0	0.19716131415026	0.0616651544790452	0.0672278504623343	58
1	0.0231815512934969	0.0253744248037218	0.0382429766909667	47		0	0.161376569261223	0.0719197958726342	0.0113104207636397	65		0	0.161376569261223	0.0719197958726342	0.0113104207636397	65		0	-0.0201445001813224	0.0198873935231928	0.0181643115134561	32
0	0.158561604042994	0.106786350523211	0.0409150409762241	79		0	0.255146090837489	0.149943336648266	0.10102865985309	88		0	0.255146090837489	0.149943336648266	0.10102865985309	88		0	0.0775127520250988	0.0326129369171343	0.0157471218768644	10
0	0.192352694654564	0.139205309349616	0.0716777253301669	86		0	0.231678298662992	0.0905587057951959	0.0326555150646684	84		0	0.231678298662992	0.0905587057951959	0.0326555150646684	84		0	0.399559668583286	0.0483219238282448	0.98142387703208	59
0	0.824269529886743	0.608127067922031	0.173370929911866	87		0	0.164211330552486	0.0486559904671348	0.0665151495244804	62		0	0.164211330552486	0.0486559904671348	0.0665151495244804	62		0	0.294317374203681	0.139436890663611	0.00915646931543163	82
0	0.107008001075581	0.0552136698073161	0.00686825050594547	62		0	0.185631749963346	0.08595895999594	0.0685610590979836	66		0	0.185631749963346	0.08595895999594	0.0685610590979836	66		0	0.381793438686805	0.237242906794132	0.198339654764773	88
0	0.145304033419865	0.0809757645661349	0.0146464154897039	75		0	0.202286419448309	0.117634746589665	0.0519885086721175	81		0	0.202286419448309	0.117634746589665	0.0519885086721175	81		0	0.182695401258623	0.0815014157253773	0.0125756447158107	89
0	0.102138850410235	0.0418311123003977	0.0207615572646499	32		1	0.416885877203833	0.0484511308734346	0.0244111438503831	80		1	0.416885877203833	0.0484511308734346	0.0244111438503831	80		1	0.731433314766138	0.249154901297295	0.880010801761858	88
0	0.311215715885945	0.234656472059563	0.154011574844023	80		0	0.186548070058833	0.122179825916045	0.0395143586585783	88		0	0.186548070058833	0.122179825916045	0.0395143586585783	88		0	0.375202944806611	0.246708476690532	0.0849645934933462	88
0	0.463435494983491	0.32248190076527	0.0767725895296159	86		0	0.164309353506215	0.084309815505077	0.0555804011045233	74		0	0.164309353506215	0.084309815505077	0.0555804011045233	74		0	0.230576325609157	0.0991833966003062	0.0229982352163817	78
0	0.136003692473333	0.0421702592994859	0.18322093493027	49		0	0.109952893862105	0.029691126505798	0.148699597788118	51		0	0.109952893862105	0.029691126505798	0.148699597788118	51		0	-0.206853783421568	0.0048302223337304	0.0117563513641451	1
0	0.311730977535744	0.309817894657944	0.00867230172637069	85		0	0.343656890968981	0.1066555972896	0.217916110901939	72		0	0.343656890968981	0.1066555972896	0.217916110901939	72		0	0.439138290156136	0.237252129285263	0.12651415582282	91
0	0.423121396724548	0.250224673157674	0.119615971629683	80		0	0.122164052050798	0.0731478791903758	0.0190574477038135	65		0	0.122164052050798	0.0731478791903758	0.0190574477038135	65		0	0.270595633727282	0.192476477943613	0.0125341264210206	95
0	0.0148549006804581	0.0282952380297025	0.0339169499155919	53		0	0.336481800259788	0.110394251465849	0.599453870023686	60		0	0.336481800259788	0.110394251465849	0.599453870023686	60		0	-0.187957432661567	0.00381931563579665	0.0114786566696352	4
0	0.382133686344071	0.20269663505661	0.0630400184783966	86		0	0.157508127827049	0.0911771605660917	0.0190423486089633	82		0	0.157508127827049	0.0911771605660917	0.0190423486089633	82		0	0.169312559652399	0.045098171676214	0.0459866181351925	60
0	0.218517218895128	0.0612613384947331	0.00358954823986988	91		0	0.353490433749135	0.141207596431826	0.386226535355537	79		0	0.353490433749135	0.141207596431826	0.386226535355537	79		0	0.224160082047702	0.12517799646987	0.035126720665322	75
0	-0.00504720979959283	0.0229132372765652	0.0164744176502219	47		0	0.146186488150773	0.0660251109268145	0.0411329898771215	60		0	0.146186488150773	0.0660251109268145	0.0411329898771215	60		0	-0.111583050738172	0.0115924269313172	0.0123636934992929	37
0	0.253458965596139	0.106591709866579	0.0267531159688143	88		0	0.232747040053607	0.0924692066330092	0.0882704569436587	70		0	0.232747040053607	0.0924692066330092	0.0882704569436587	70		0	0.149943953187903	0.0783182760822166	0.00736535449155807	74
1	0.241185046843715	0.194580675592479	0.0435682850703168	92		1	0.548192113031367	0.317462798647622	0.666186917115193	93		1	0.548192113031367	0.317462798647622	0.666186917115193	93		0	0.677947692225437	0.282139629978359	0.251085184459795	88
0	0.0772468624193235	0.0318732708346324	0.00783427422310413	61		0	0.203421406469877	0.0811344531736546	0.0097482934903744	71		0	0.203421406469877	0.0811344531736546	0.0097482934903744	71		0	0.400285480808855	0.210272081541043	0.172206279767625	91
0	0.062260286765728	0.0322567166086642	0.154887341731738	45		1	0.543188804188461	0.295730643082775	0.704007122810545	76		1	0.543188804188461	0.295730643082775	0.704007122810545	76		0	0.158042802423176	0.0313664988630579	0.478581802607285	38
0	0.162034304781901	0.0834393372122881	0.0231645998842786	52		0	0.202986136082398	0.0947730476000317	0.0693968196556377	76		0	0.202986136082398	0.0947730476000317	0.0693968196556377	76		0	0.153140758573472	0.0863946752012695	0.0339542019879159	64
0	0.0660815257283797	0.026545454051246	0.0131685100673726	54		1	0.190710782900091	0.0927322354596966	0.018214482815475	76		1	0.190710782900091	0.0927322354596966	0.018214482815475	76		0	-0.0280440998077999	0.0324719652601269	0.0126350903717323	48
0	0.150120649616882	0.0961375182961282	0.015476882553712	59		0	0.139785579359919	0.085948087940699	0.00745336110760516	68		0	0.139785579359919	0.085948087940699	0.00745336110760516	68		0	-0.130167852243918	0.00865860407070693	0.0140612396920266	13
0	-0.0339258743399853	0.0298068259468095	0.00054682436728201	37		0	0.15205616572807	0.0973935826129393	0.0266989313600559	64		0	0.15205616572807	0.0973935826129393	0.0266989313600559	64		0	0.0875639015988998	0.0400112242849026	0.0890696200628552	36
0	0.321567721601753	0.162877256437892	0.564450707497882	57		0	0.217047423955391	0.137207066038485	0.0865567551594258	81		0	0.217047423955391	0.137207066038485	0.0865567551594258	81		0	0.0173847561699259	0.0263378369428259	0.0198168293658075	38
0	-0.00351363017016665	0.0161542255773993	0.0568746264237987	48		0	0.298178766745752	0.275415069855904	0.0791353843437319	90		0	0.298178766745752	0.275415069855904	0.0791353843437319	90		1	0.433217239881237	0.409229578823892	0.0779189564762562	89
0	-0.0626858547806773	0.0197409634872134	0.0305679912901323	35		0	0.217324667859734	0.125886671728002	0.0859678845733186	63		0	0.217324667859734	0.125886671728002	0.0859678845733186	63		0	0.0875639015988998	0.0400112242849026	0.0890696200628552	36
0	0.313438008874396	0.199873047182773	0.0191691290529089	76		0	0.036862516455138	0.0534274102051607	0.00868611023037569	65		0	0.036862516455138	0.0534274102051607	0.00868611023037569	65		0	0.0844466675303725	0.0538068869190649	0.0148540769252185	56
0	0.39798561657097	0.353784619139822	0.0284416718822049	83		0	0.326074314786308	0.0851678096112246	0.124519895896662	79		0	0.326074314786308	0.0851678096112246	0.124519895896662	79		0	0.328273457545824	0.187874808626996	0.0255105658139413	95
0	0.310883744824387	0.143868439734201	0.0297666828306863	77		1	0.352144006155386	0.0837666321604979	0.622616790326444	74		1	0.352144006155386	0.0837666321604979	0.622616790326444	74		0	0.19563784777235	0.105001774611334	0.0147329749218666	84
0	0.135529579940968	0.0450451984997691	0.00521545504956691	60		0	0.484525165889774	0.123050165995469	0.783374418355969	79		0	0.484525165889774	0.123050165995469	0.783374418355969	79		0	-0.00821382586756146	0.0153284651490601	0.188955519786404	25
0	0.0769558661636719	0.0528343900264546	0.00769911552598838	52		0	-0.0398885783001958	0.0190915488938265	0.012541839437792	48		0	-0.0398885783001958	0.0190915488938265	0.012541839437792	48		0	0.307028213367908	0.118264536718284	0.0212327189808876	92
0	0.42970568167996	0.25264104671619	0.467163600234259	92		0	0.368302291006323	0.179851936370037	0.116293798972883	81		0	0.368302291006323	0.179851936370037	0.116293798972883	81		1	0.358857376849232	0.220071008237559	0.0790088007183495	87
0	0.151711583582856	0.0739676865369224	0.00379347949032312	80		0	0.188433869244801	0.100856153734931	0.0274347711745306	72		0	0.188433869244801	0.100856153734931	0.0274347711745306	72		0	0.294655357722372	0.155308463809237	0.0270011794871155	72
0	0.171303980029282	0.105041647608674	0.0482102311298248	73		0	0.271485701078769	0.121338832187127	0.00621961696011297	87		0	0.271485701078769	0.121338832187127	0.00621961696011297	87		0	0.228368433901335	0.118525228142976	0.0389586732740693	66
0	0.14783743695894	0.0980372740587939	0.0185936965806854	75		0	0.316740013789874	0.142091988897434	0.0176149404719517	78		0	0.316740013789874	0.142091988897434	0.0176149404719517	78		0	0.263668545514368	0.176928593895625	0.0215854069303745	84
0	0.403988001883989	0.25264104671619	0.157117594729338	92		0	0.277665189770968	0.0457380803343878	0.832044810466909	45		0	0.277665189770968	0.0457380803343878	0.832044810466909	45		0	0.103552308613074	0.0371842172806858	0.446452635900032	40
0	0.100041900121678	0.0471429232713205	0.0140941101033266	54		0	0.331409048046061	0.165101601399498	0.15752658973254	72		0	0.331409048046061	0.165101601399498	0.15752658973254	72		0	0.0909392318765163	0.00948528081637015	0.834452906799314	30
0	0.0181329530895004	0.0293061887157967	0.0167700589938301	48		0	0.174217590708737	0.0782802330739991	0.0217728117740361	69		0	0.174217590708737	0.0782802330739991	0.0217728117740361	69		0	0.182432171726465	0.0683833770805755	0.0853933002470575	65
0	0.401077193985916	0.157427977021504	0.100561078924814	80		0	0.386298665396917	0.177938362477346	0.621780910335362	77		0	0.386298665396917	0.177938362477346	0.621780910335362	77		0	-0.132778202359968	0.00821999575460164	0.00278605144962103	44
0	0.373235063884069	0.176405299392038	0.515567487579683	63		0	0.221468956988862	0.050389039966542	0.5163671710405	61		0	0.221468956988862	0.050389039966542	0.5163671710405	61		0	0.306675110665595	0.200416582445511	0.0506119049675957	85
0	-0.145337599332157	0.00500675768573013	0.00807353204701953	30		0	0.0762285435281504	0.0577210241336462	0.00734551363792949	64		0	0.0762285435281504	0.0577210241336462	0.00734551363792949	64		0	-0.00145001800930213	0.0115140126763041	0.411996987961312	20
0	0.198019429621006	0.105505933095012	0.0281619626321223	70		0	0.281874791378852	0.191996214391153	0.0193123557743493	90		0	0.281874791378852	0.191996214391153	0.0193123557743493	90		0	0.117250911422995	0.0676781663092809	0.0381136166917145	71
0	0.459236873067444	0.371201913471581	0.186649769603275	89		0	0.289683042566616	0.240312224312652	0.0148236042253929	89		0	0.289683042566616	0.240312224312652	0.0148236042253929	89		0	0.542315474599163	0.123722739289668	0.730602167168767	75
0	0.167801172697873	0.0621511601309355	0.304250794186431	47		0	0.612098833769218	0.226754271927692	0.977677289626927	76		0	0.612098833769218	0.226754271927692	0.977677289626927	76		0	0.244424543582227	0.155093375728463	0.0304936622733639	79
0	0.317148668116723	0.233047232446242	0.0544153095318765	77		1	0.32409658283267	0.166474569555879	0.358133178055843	72		1	0.32409658283267	0.166474569555879	0.358133178055843	72		0	0.497789668486596	0.395375934264703	0.503071092852102	94
0	0.0475763389158206	0.0352066568380661	0.0157884699985898	54		0	0.12591868018596	0.0672738262173573	0.00354297615212118	61		0	0.12591868018596	0.0672738262173573	0.00354297615212118	61		0	-0.039739132022199	0.016341418747826	0.0351842655632545	27
1	0.650108432472288	0.297883269531667	0.176551605284942	85		0	0.246299141222356	0.134731664560479	0.073741821182771	72		0	0.246299141222356	0.134731664560479	0.073741821182771	72		0	-0.12085763386156	0.00615355706046251	0.385957036260215	2
0	0.408309851727878	0.188923825150048	0.00761937852480246	83		0	0.299296158303633	0.125773063454967	0.236585599799034	78		0	0.299296158303633	0.125773063454967	0.236585599799034	78		0	0.612651593433745	0.237316988219484	0.726851615857105	88
0	0.410086027204055	0.323500595973201	0.193612927878243	85		0	0.227116990175205	0.139547964698155	0.143082910031157	86		0	0.227116990175205	0.139547964698155	0.143082910031157	86		0	0.276886990568237	0.0422680500194012	0.140598233104687	26
0	0.111607790749083	0.0420890130295749	0.166361889287209	49		0	0.218097133159614	0.0870304396616391	0.326234887483188	65		0	0.218097133159614	0.0870304396616391	0.326234887483188	65		0	0.306406651175893	0.0879474760257768	0.282560326527649	62
0	0.447069230691222	0.271883833016173	0.159078057183874	80		1	0.253148247352695	0.197504904588823	6.02679893110411e-10	81		1	0.253148247352695	0.197504904588823	6.02679893110411e-10	81		0	0.0630343503117518	0.0542171389600844	0.00220815159610811	70
0	0.285282490588909	0.0995382768607551	0.0384354741392271	85		0	0.109267234745666	0.0530405521723129	0.106778793597421	60		0	0.109267234745666	0.0530405521723129	0.106778793597421	60		1	0.451677716515453	0.0891568766788503	0.858445764324642	78
0	0.495382899493995	0.113877072529415	0.0164145252052742	83		1	0.312371109491955	0.124173190039566	0.0392027056735507	74		1	0.312371109491955	0.124173190039566	0.0392027056735507	74		0	0.0634588069813868	0.0393002359033627	0.22701158771011	36
0	0.169976161227233	0.0971965910192319	0.00801476373383775	70		0	0.138529397804529	0.0515415948268537	0.133181827398143	66		0	0.138529397804529	0.0515415948268537	0.133181827398143	66		0	0.349082880779176	0.172058193981174	0.048878645324573	71
1	0.55773118448297	0.210818804979784	0.533026384474484	88		1	0.54260821328146	0.202225122908396	0.393204400143324	74		1	0.54260821328146	0.202225122908396	0.393204400143324	74		0	0.194832435248466	0.0600354625379349	0.294232334751847	54
0	0.309225703391583	0.154864455918058	0.287416663485829	71		0	0.0100624114652627	0.0342793559908083	0.0289085030972775	41		0	0.0100624114652627	0.0342793559908083	0.0289085030972775	41		0	-0.0343474250553823	0.0178736119634739	0.0175748483287102	29
0	0.136495696814611	0.0903660120379491	0.0023463811943617	56		1	0.292171915067117	0.208236066293146	0.0127480630872941	94		1	0.292171915067117	0.208236066293146	0.0127480630872941	94		0	0.331584234701552	0.199548275935624	0.0569667271930289	85
0	0.255617968347327	0.108111152330941	0.0364719574252933	74		1	0.339538308843403	0.204716873456036	0.0342389739716773	87		1	0.339538308843403	0.204716873456036	0.0342389739716773	87		0	-0.0776024080232925	0.00682452292138803	0.143513649249968	4
0	0.218932598954136	0.114125690546734	0.00560677568211078	84		0	0.331238838344859	0.115711940354949	0.480430272942003	65		0	0.331238838344859	0.115711940354949	0.480430272942003	65		0	0.357271003905223	0.142535883644507	0.20996279703892	76
0	0.229761650247413	0.095695862794186	0.0686247553502604	41		0	0.175635022460927	0.122236331483228	0.0434383347220314	77		0	0.175635022460927	0.122236331483228	0.0434383347220314	77		1	0.550883665909133	0.35237796229055	0.227674079741208	79
0	-0.0912176922457492	0.0251641733066723	0.0047776855137534	28		0	0.203805696629375	0.081795540348502	0.0849242693735025	74		0	0.203805696629375	0.081795540348502	0.0849242693735025	74		0	0.200247249033268	0.0631050720355896	0.0126482533691027	70
0	0.0751841517327683	0.074336828109397	0.0209494065684598	53		0	0.105228990302167	0.0471924811932954	0.19611280633554	50		0	0.105228990302167	0.0471924811932954	0.19611280633554	50		0	0.308525723511172	0.139809071254881	0.0798526341127429	79
0	0.0670391629532391	0.0255779493301795	0.082761706083931	43		0	0.130459962803578	0.0575536473287875	0.0549996271071432	61		0	0.130459962803578	0.0575536473287875	0.0549996271071432	61		0	0.0776598276919823	0.045686371388888	0.00823826862491584	48
0	0.260293087899428	0.19909743631413	0.00823276987141132	88		1	0.431525305318682	0.173331974004808	0.812166141040097	79		1	0.431525305318682	0.173331974004808	0.812166141040097	79		1	0.30353687657067	0.153110586358404	0.024583366703684	91
1	0.494615572857846	0.17933637796399	0.163197790006701	87		0	0.379668283517443	0.123574035891109	0.858702882303779	62		0	0.379668283517443	0.123574035891109	0.858702882303779	62		1	0.874748449449844	0.290698019717997	0.919180201888682	86
0	0.122456442515113	0.112214597349149	0.0320007207489579	63		0	0.208092630583978	0.145544527962344	0.0159731040862634	77		0	0.208092630583978	0.145544527962344	0.0159731040862634	77		0	-0.273091871586747	0.00298110676073614	0.00907210927676128	3
0	0.388630516088306	0.297514053931889	0.0117243609799225	87		1	0.514893485086729	0.236582489337698	0.240335154544432	90		1	0.514893485086729	0.236582489337698	0.240335154544432	90		0	0.273724511047862	0.15007370556596	0.0384984883733326	89
0	0.208354924665235	0.0929919511542023	0.0816713611876473	76		0	0.621064311353815	0.116180775766226	0.448995238541623	67		0	0.621064311353815	0.116180775766226	0.448995238541623	67		0	0.0430229114282402	0.05569621194925	0.0157626024457071	63
0	0.183869069963407	0.0774301256356015	0.124344488319271	60		1	0.415398123473771	0.115469722601852	0.612916512741989	73		1	0.415398123473771	0.115469722601852	0.612916512741989	73		0	0.384302427057723	0.12332559837752	0.521493061921555	69
1	0.395072625832954	0.376787542517724	0.185262259052243	89		0	0.342519016484416	0.0726454985986369	0.864262548648261	54		0	0.342519016484416	0.0726454985986369	0.864262548648261	54		0	0.263617734678886	0.151188303665389	0.0359191643415524	91
1	0.504998270559824	0.311132194775391	0.66819935650862	87		0	0.0740792794955413	0.0491115296578133	0.0396350356848994	55		0	0.0740792794955413	0.0491115296578133	0.0396350356848994	55		0	0.384548489178567	0.0818690227462918	0.0415955729784646	69
0	0.442884628625877	0.46257959992395	0.120082101627423	89		0	-0.0275172746844815	0.0235785708380352	0.0089830166435468	48		0	-0.0275172746844815	0.0235785708380352	0.0089830166435468	48		1	0.580099370479535	0.456845514724909	0.0877177369576037	90
0	0.160643879882654	0.0780772025166542	0.0314732258285899	52		0	-0.0015222113157633	0.0324961684618531	0.0297525610476163	39		0	-0.0015222113157633	0.0324961684618531	0.0297525610476163	39		0	0.0548664371468713	0.0546384141383783	0.0107777243379946	67
0	0.14692710918164	0.065567724098296	0.0112523080545641	67		0	0.06881537623807	0.0277398915097005	0.0997905472165953	58		0	0.06881537623807	0.0277398915097005	0.0997905472165953	58		0	-0.0829251870191894	0.0116554005134171	0.0384482161726592	20
0	0.126156811402932	0.0767320005161969	0.0406210042530649	54		0	0.324258752483088	0.202522830273018	0.169020949362476	84		0	0.324258752483088	0.202522830273018	0.169020949362476	84		1	0.984190880845725	0.780426476566346	0.0913710770627092	101
1	0.450374577684166	0.328422944008908	0.029047000625296	88		0	0.020109804795332	0.0310454997626722	0.00463579999851556	47		0	0.020109804795332	0.0310454997626722	0.00463579999851556	47		1	0.626062885406658	0.377372240339091	0.862993434321027	89
0	0.369114745748352	0.200347038167029	0.0992242556260877	79		0	0.145115213693476	0.0951825079590021	0.0844952744450133	61		0	0.145115213693476	0.0951825079590021	0.0844952744450133	61		0	0.169421499897147	0.0410928467593543	0.0159493942246353	57
1	0.290919168841806	0.151716363602906	0.0852308783886556	81		0	0.190121483711119	0.0984447430910441	0.105706426126478	71		0	0.190121483711119	0.0984447430910441	0.105706426126478	71		0	0.436198731816152	0.173835968020041	0.471672619331537	85
0	0.294334224478623	0.246045737599783	0.0462489061444419	92		0	0.039976533175295	0.0442439136761057	0.00919523659437819	51		0	0.039976533175295	0.0442439136761057	0.00919523659437819	51		1	0.475749733554555	0.131839842019937	0.52824782084116	68
1	0.461772005829454	0.346425014220914	0.189993422209716	90		0	-0.0370178360441299	0.0147394998825286	0.0134877494701634	45		0	-0.0370178360441299	0.0147394998825286	0.0134877494701634	45		0	0.138466012460229	0.0325978287187161	0.00636164531089155	69
0	-0.150353807850887	0.0124587574094992	0.00470169264849307	26		1	0.19750712356068	0.0467705096642133	0.0523649534062586	73		1	0.19750712356068	0.0467705096642133	0.0523649534062586	73		0	0.491393867363409	0.258876308657999	0.0993299763520194	91
0	0.21165416006894	0.122286466872188	0.0131866245237466	70		0	0.288272189112981	0.191996214391153	0.0193123557743493	90		0	0.288272189112981	0.191996214391153	0.0193123557743493	90		1	0.283483226870411	0.153282708786244	0.06680938295454	88
0	-0.0865364193048943	0.0116217603243693	0.00881045308940611	30		0	0.232992768895444	0.0128781386885829	0.0541622305663555	43		0	0.232992768895444	0.0128781386885829	0.0541622305663555	43		1	0.199212566381788	0.102323382136314	0.0209425998507765	78
0	0.303406063695858	0.117634540454583	0.0249432381597634	73		0	0.36019829013651	0.165442404808919	0.0724139291315196	74		0	0.36019829013651	0.165442404808919	0.0724139291315196	74		1	0.326622334292099	0.155199338551402	0.033385341566471	77
0	0.0766519479023015	0.0422039485643868	0.0079519219576637	64		0	0.20502428842009	0.0358500313964087	0.481631540874922	54		0	0.20502428842009	0.0358500313964087	0.481631540874922	54		0	-0.275154199946336	0.00535491417116036	0.00453920050027682	3
0	0.14906287017592	0.0845624866853765	0.0210439649179553	74		0	0.18673426757271	0.0949110001004001	0.0881671768001515	70		0	0.18673426757271	0.0949110001004001	0.0881671768001515	70		0	0.36128224966346	0.136506428851433	0.112222128675291	86
0	0.0049996639041696	0.0164738332951926	0.00295415553355109	48		0	0.251510990506856	0.0735736099332708	0.0422780718717671	80		0	0.251510990506856	0.0735736099332708	0.0422780718717671	80		0	0.0114339936648223	0.025193609476979	0.0195453005516409	37
0	0.169857948693298	0.100586839613193	0.0525299463707324	69		0	0.29813908042751	0.0607694983773013	0.143283515140106	75		0	0.29813908042751	0.0607694983773013	0.143283515140106	75		0	0.0648830863075838	0.00943429734963362	0.928847043515685	9
0	0.240098788242668	0.114304663837471	0.0286202539130865	75		0	0.293358606738858	0.183263956654667	0.0226804596323719	97		0	0.293358606738858	0.183263956654667	0.0226804596323719	97		0	-0.0857508348715688	0.0121258891598565	0.0155944137628567	21
0	0.162349470059794	0.0676714910021114	0.0183382831189153	71		0	0.0140653959642	0.0442059637883494	0.0154139718348134	50		0	0.0140653959642	0.0442059637883494	0.0154139718348134	50		0	0.14677279391448	0.0367295012813916	0.304681928966422	49
0	0.040281966648914	0.0492609745428921	0.000511007620488052	55		1	0.60130946045945	0.254231277493105	0.958656323858225	79		1	0.60130946045945	0.254231277493105	0.958656323858225	79		0	0.259250062783204	0.149130790173648	0.0362906819011386	95
0	0.127002336554159	0.057090137127394	0.0167505309218494	39		0	0.369301246409084	0.188849375831456	0.16520337612401	83		0	0.369301246409084	0.188849375831456	0.16520337612401	83		0	0.467919560982244	0.218676552510935	0.611367880331122	85
0	0.136024241861562	0.085774156443986	0.02675431154697	61		0	0.336077013968624	0.198500877056887	0.188127876787735	74		0	0.336077013968624	0.198500877056887	0.188127876787735	74		0	0.15421579203501	0.0159347277901055	0.0385321427992411	50
0	0.0118913669598603	0.0333056561974531	0.014629683909946	29		0	0.286315164275081	0.0934413929664964	0.0699370480514709	81		0	0.286315164275081	0.0934413929664964	0.0699370480514709	81		0	0.118467296827451	0.0709753596371141	0.00601841939293947	71
0	0.460649233502222	0.0665852697883109	0.145538577354143	53		1	0.415036127440232	0.217196735524908	0.767857200792436	88		1	0.415036127440232	0.217196735524908	0.767857200792436	88		0	0.21871048562063	0.117625522253563	0.1817797761944	72
1	0.396391752124058	0.236650229014835	0.305953694248441	90		0	0.232034167323835	0.158811821653128	0.0837253070549487	74		0	0.232034167323835	0.158811821653128	0.0837253070549487	74		1	0.314758310530644	0.0675875925191045	0.298528258196709	61
0	0.402878609682874	0.137718115040442	0.583815944595398	69		0	0.153343182054829	0.0701983314992197	0.0202805507897833	69		0	0.153343182054829	0.0701983314992197	0.0202805507897833	69		1	0.491095209038725	0.229365829580998	0.510290535240454	89
1	0.36351745893589	0.227491407087706	0.206003332752209	87		0	0.541730005906526	0.360266088214002	0.370203961674991	92		0	0.541730005906526	0.360266088214002	0.370203961674991	92		0	0.291446067974098	0.135049198625045	0.194197562372305	72
0	0.205117666679657	0.107387819562118	0.107026844473339	78		1	0.424043635851475	0.28759030622751	0.115714817931855	94		1	0.424043635851475	0.28759030622751	0.115714817931855	94		0	0.151821400500908	0.0462325949412294	0.0240016639873081	59
0	0.308527331026994	0.209198180766564	0.0939913653239704	91		0	0.0704914450468948	0.0290140049385925	0.0172496728900792	55		0	0.0704914450468948	0.0290140049385925	0.0172496728900792	55		0	0.188072665198571	0.11518752965872	0.0163326707048719	71
1	0.565014238716295	0.316766120034403	0.179366584022996	92		1	0.385465034915271	0.244723910204705	0.130017061458727	88		1	0.385465034915271	0.244723910204705	0.130017061458727	88		0	0.558853881414237	0.132493681031609	0.0590189609426541	78
0	0.370656124296709	0.282654720703619	0.0501141737721919	93		0	0.2936564249896	0.105135784818286	0.11493728076543	68		0	0.2936564249896	0.105135784818286	0.11493728076543	68		0	0.226266994597209	0.0863163091197585	0.0270291652455728	84
0	0.253349769072174	0.126214126184361	0.100114327500257	92		0	0.199044703073868	0.112325498862663	0.0637161326802415	87		0	0.199044703073868	0.112325498862663	0.0637161326802415	87		0	0.564987658204498	0.423462626295633	0.180289661196268	93
0	0.110875041232202	0.0455203509213926	0.0309343268017043	65		0	-0.0770835063804439	0.0224864344263069	0.00124930734515156	45		0	-0.0770835063804439	0.0224864344263069	0.00124930734515156	45		0	0.231455453195441	0.0875275961863133	0.267663753756862	62
1	0.608351890693717	0.350440375460686	0.838415297858264	88		0	0.131027726712832	0.0580608747712117	0.174164705605842	54		0	0.131027726712832	0.0580608747712117	0.174164705605842	54		0	0.200361594686655	0.0818072075785728	0.0659961085080876	62
0	0.292105619114239	0.0608802417532815	0.107832873390345	71		0	0.148777942949501	0.0497848526745866	0.0568880915371046	60		0	0.148777942949501	0.0497848526745866	0.0568880915371046	60		0	0.319008799971691	0.194737551509236	0.0233521712204408	91
0	0.351980513925084	0.120205365314256	0.00517671250952086	89		0	0.407575017705814	0.187936021711022	0.632278495300731	78		0	0.407575017705814	0.187936021711022	0.632278495300731	78		0	0.334506550968397	0.2541595469414	0.00806865402332991	91
0	0.158100385508261	0.0724732365376151	0.0390373779684369	76		0	0.214940520583053	0.117202378934861	0.0180966700241379	77		0	0.214940520583053	0.117202378934861	0.0180966700241379	77		0	0.0839857926723067	0.0328444102650643	0.0135727655334709	58
0	0.195491907303511	0.127766224858603	0.00625785730184125	69		0	0.196833314646983	0.0869467374859565	0.0548571826434175	60		0	0.196833314646983	0.0869467374859565	0.0548571826434175	60		0	0.00862299811683119	0.0246700842909333	0.0194183082022587	37
1	0.478318469125902	0.222065910495064	0.479276899019828	71		0	0.372670100393098	0.13323744815667	0.304798481418992	76		0	0.372670100393098	0.13323744815667	0.304798481418992	76		0	0.00494075833466754	0.0240003162255662	0.0192531786624295	36
0	0.112981881886016	0	0.0132882217748244	63		0	0.200187207067811	0.0577891075925466	0.496639071433245	53		0	0.200187207067811	0.0577891075925466	0.496639071433245	53		0	-0.0556448589296631	0.0304948487878287	0.00922669568619031	37
0	0.0413331835090468	0.0511984171070649	0.00203232599459756	53		0	0.206612109858825	0.0759651777682858	0.0437593243204562	75		0	0.206612109858825	0.0759651777682858	0.0437593243204562	75		0	-0.339357726499033	0.0075363173694329	0.00143445991991405	9
0	0.0854917461472009	0.0518974382701679	0.0252693268668225	51		1	0.530643275321469	0.175469451773397	0.283416208574162	68		1	0.530643275321469	0.175469451773397	0.283416208574162	68		0	-0.0948167941691779	0.0105062046126202	0.11659925468371	22
0	0.252817703374253	0.143391839946972	0.0165148604872102	78		0	0.409992236698415	0.431261781846714	0.10679558112577	103		0	0.409992236698415	0.431261781846714	0.10679558112577	103		0	-0.45169653317901	0.00187504140579593	0.000229555367872028	0
0	0.0775128898691204	0.0692252439432135	0.00666713943843401	51		0	0.13433604429805	0.0750066044823217	0.101373577795966	63		0	0.13433604429805	0.0750066044823217	0.101373577795966	63		0	0.0740521286654751	0.0593016573522682	0.0104202997556872	56
0	0.226506550364888	0.151520974246857	0.0172143463515059	67		0	0.137789217667803	0.0511002314841994	0.0033541403259656	78		0	0.137789217667803	0.0511002314841994	0.0033541403259656	78		0	0.0849468679480776	0.0794330591304904	0.0170128560387128	65
0	0.140293990451579	0.0901036129018835	0.010275797818243	55		1	0.180900512362566	0.0648958483108882	0.0263202225572276	77		1	0.180900512362566	0.0648958483108882	0.0263202225572276	77		0	0.297872962079161	0.10032741307546	0.517810857414958	64
0	0.238785039009711	0.121210239919028	0.0420516226360477	78		0	0.0867254238073791	0.0950049788252494	0.0166431735430906	77		0	0.0867254238073791	0.0950049788252494	0.0166431735430906	77		0	-0.166094399644717	0.0108656045392208	0.0104717038357822	29
0	0.142495653500094	0.0591648187764658	0.0208219471406369	60		0	0.276341405163141	0.15077639828035	0.0195173350755884	96		0	0.276341405163141	0.15077639828035	0.0195173350755884	96		0	0.281508550053461	0.154750828953939	0.0663765356093727	78
0	0.245396281330543	0.115948272770446	0.0979380628753037	73		0	0.214534538183947	0.0770806492290558	0.174457884577326	70		0	0.214534538183947	0.0770806492290558	0.174457884577326	70		0	0.33110713009213	0.186440678312465	0.0271928827205084	92
0	0.0755954152898834	0.0350306791187076	0.0226722374815721	57		1	0.530431682266496	0.384762757179428	0.0983623303611314	98		1	0.530431682266496	0.384762757179428	0.0983623303611314	98		1	0.345339530850188	0.192184417288066	0.132591698254347	88
0	0.0666402568690806	0.0485419813360488	0.00407382846911909	56		0	0.334709476911756	0.201004116096116	0.0887846958279597	82		0	0.334709476911756	0.201004116096116	0.0887846958279597	82		0	0.322992837495804	0.188927666627565	0.148920041563552	78
0	0.0858455061887804	0.046562204558775	0.0105051711068591	59		0	-0.0955537436151368	0.017617117048907	0.00371397404417722	32		0	-0.0955537436151368	0.017617117048907	0.00371397404417722	32		1	0.418557497296459	0.293460702737517	0.0762854740975192	96
0	0.313748006992758	0.153653735448203	0.09039751332017	61		0	0.40769492694507	0.176517032078092	0.276959123039256	84		0	0.40769492694507	0.176517032078092	0.276959123039256	84		1	0.12232267249545	0.041032680300685	0.0158182220000604	61
0	0.294200157904916	0.178537787415388	0.04421664722326	81		0	0.22484510503679	0.155300808966764	0.0858563702356897	73		0	0.22484510503679	0.155300808966764	0.0858563702356897	73		0	0.524385191628148	0.128541975724316	0.881918513941485	69
0	0.400864078041759	0.276436908985064	0.0810274077677692	82		0	-0.111587194772347	0.038420869976962	0.00247333135128633	53		0	-0.111587194772347	0.038420869976962	0.00247333135128633	53		0	-0.12556379296778	0.0122334705110113	0.0111836828678727	21
0	0.279069153347403	0.16843394897166	0.125558466477805	67		0	0.20505741280803	0.0872606154847015	0.151449557432199	64		0	0.20505741280803	0.0872606154847015	0.151449557432199	64		0	0.383119719952513	0.0472259348631269	0.951722277415157	57
0	0.374298457490982	0.253885396657283	0.203141892538485	69		0	0.316978223440258	0.179121594526973	0.66333572111644	90		0	0.316978223440258	0.179121594526973	0.66333572111644	90		0	0.176971150668831	0.101551234832875	0.00921477928717671	74
0	0.341022898758699	0.19979564959558	0.0700176068676419	76		1	0.357887879896902	0.223026663348577	0.111660604672362	88		1	0.357887879896902	0.223026663348577	0.111660604672362	88		0	0.0183988847686646	0.0293269872912324	0.0124896214082267	40
0	-0.11197037973189	0.012603020754185	0.0041236889847646	31		0	0.19060331529738	0.11067170474855	0.0971123197189006	78		0	0.19060331529738	0.11067170474855	0.0971123197189006	78		0	-0.295467157326563	0.00497681558632834	0.0142767315533959	1
0	0.372510808477439	0.272387523193554	0.276727473725714	83		0	0.341914713258582	0.117462734757989	0.25160699584616	79		0	0.341914713258582	0.117462734757989	0.25160699584616	79		0	0.0397595070036155	0.186690190155518	0.03260022555153	59
1	0.201686937317357	0.102696949640771	0.0892737459094131	62		0	0.465837169174994	0.345390551122335	0.198642582958503	85		0	0.465837169174994	0.345390551122335	0.198642582958503	85		0	0.0364109526684232	0.0191854673134322	0.0790420739753364	31
0	0.341062544773221	0.0843579628010371	0.0647362349699102	49		0	0.312996110012573	0.13679196312301	0.107347137298073	88		0	0.312996110012573	0.13679196312301	0.107347137298073	88		0	-0.23852187691084	0.00366217507756719	0.0459519996665882	0
0	0.244858234170272	0.174320480078	0.0231576088620367	68		0	0.0206464576024686	0.0365133390798828	0.0699387934796159	44		0	0.0206464576024686	0.0365133390798828	0.0699387934796159	44		0	0.391973730613371	0.0304884816562035	0.548426040104795	50
1	0.477167960142755	0.25497538439578	0.544811212043273	72		0	0.219529304276637	0.0772087634493674	0.0226282287414012	78		0	0.219529304276637	0.0772087634493674	0.0226282287414012	78		1	0.313308336608726	0.222801734719497	0.0661769753797564	88
0	0.110810460334505	0.0420890130295749	0.163573678286506	49		0	0.295793474564019	0.220706553936344	0.128278655862154	84		0	0.295793474564019	0.220706553936344	0.128278655862154	84		0	-0.229301763143065	0.00754214163029221	0.000852404493965804	33
0	0.172230012899255	0.104014211092139	0.0206437083752135	62		1	0.175491603208988	0.0732822434801833	0.127003609186585	61		1	0.175491603208988	0.0732822434801833	0.127003609186585	61		0	0.15375103406152	0.0288652418124571	0.0196894201850335	50
0	0.413151312818232	0.153276098820532	0.0470547522748505	88		0	0.0917954075631643	0.0537900736853037	0.00451037269295409	60		0	0.0917954075631643	0.0537900736853037	0.00451037269295409	60		0	0.0237171396921095	0.00994153814261735	0.194340371331132	25
0	0.416075498582033	0.29169401198985	0.212078342875318	78		1	0.454990172245165	0.147112491329586	0.650413681047822	78		1	0.454990172245165	0.147112491329586	0.650413681047822	78		0	0.214374907249448	0.0817241351572998	0.0149756124950441	78
0	0.216030351356688	0.122578867672149	0.0393742473121947	75		0	0.285765627789415	0.112944159105594	0.102392270768397	74		0	0.285765627789415	0.112944159105594	0.102392270768397	74		0	0.452079177298656	0.227628245722845	0.271771046191237	88
0	0.139823508610296	0.113891289912667	0.0148903307239007	69		1	1.32075941306589	0.418917169856579	0.999961247456652	81		1	1.32075941306589	0.418917169856579	0.999961247456652	81		0	0.616969933861086	0.07319847703422	0.492226553919623	57
0	0.144522098971759	0.0707404660648285	0.0509473796508922	73		0	0.307601266412266	0.0621886343021776	0.148578493769637	62		0	0.307601266412266	0.0621886343021776	0.148578493769637	62		0	0.234287848286379	0.076410811393787	0.0610743365539231	76
0	0.472354360655067	0.435009723841028	0.167833668674487	82		1	0.313591383589846	0.192369567404279	0.0610611853630317	66		1	0.313591383589846	0.192369567404279	0.0610611853630317	66		0	0.416442512550764	0.139723359665479	0.111777031180616	70
1	0.31510430002137	0.174859401314588	0.075002206656147	85		0	0.172936275725054	0.0749769234207531	0.113720879299016	62		0	0.172936275725054	0.0749769234207531	0.113720879299016	62		0	0.371630264340799	0.218276437439738	0.07775331083368	89
0	0.245763210027625	0.162982316111921	0.0713871576643082	80		0	0.175377958864354	0.0340708545937892	0.100398563569404	56		0	0.175377958864354	0.0340708545937892	0.100398563569404	56		0	0.106879778325029	0.0300405257653791	0.0675222223415756	57
0	0.32645485826599	0.198694125619343	0.0953010061351385	79		0	0.35784968440239	0.228488119360364	0.34913560531937	86		0	0.35784968440239	0.228488119360364	0.34913560531937	86		1	0.442794000695513	0.249753443364979	0.417324823406505	89
0	0.381585181781165	0.144670949029359	0.0583101983011281	69		0	0.10927719495258	0.0565950683724087	0.00924219300020834	59		0	0.10927719495258	0.0565950683724087	0.00924219300020834	59		0	-0.0628277614909715	0.031590166990253	0.0040093820261509	39
0	0.678800880567309	0.339377638448923	0.948258852748614	78		1	0.280367607843826	0.167949131647625	0.0515905973931731	83		1	0.280367607843826	0.167949131647625	0.0515905973931731	83		1	0.670863049673647	0.505875101449287	0.360955402055969	104
0	0.379805178189692	0.204652809653996	0.0368395564874742	74		1	0.358558706507148	0.193387937544335	0.16142668768657	82		1	0.358558706507148	0.193387937544335	0.16142668768657	82		1	0.395372175769107	0.24503995824664	0.122025519084289	95
0	0.10526504757975	0.0497556469891619	0.0429679284221962	40		0	0.133447441413398	0.0434436812859531	0.0467839264076635	51		0	0.133447441413398	0.0434436812859531	0.0467839264076635	51		0	0.406586962078089	0.269590891422316	0.257273466883124	86
0	0.334796249596878	0.16823623216691	0.475070729499669	81		1	0.58239133262624	0.291098811121674	0.872083921767382	92		1	0.58239133262624	0.291098811121674	0.872083921767382	92		0	-0.136669650011013	0.0169366215591153	0.00341620133324021	26
0	0.132362485302996	0.058481596630592	0.0824062162937917	68		1	0.55570789907603	0.229525325618439	0.885914791987397	82		1	0.55570789907603	0.229525325618439	0.885914791987397	82		0	-0.330314795929861	0.00418752526123099	0.000997340771327254	6
0	0.171040122164682	0.0978178971515203	0.0231576088620367	68		0	0.324780690186822	0.0703505010613482	0.0904578029322705	67		0	0.324780690186822	0.0703505010613482	0.0904578029322705	67		0	0.0709402890365941	0.0377013500011554	0.0285913409130604	51
0	0.27226588943118	0.152339645781749	0.0522769427729257	53		0	0.310710884811967	0.157801831606416	0.345789509036871	70		0	0.310710884811967	0.157801831606416	0.345789509036871	70		0	0.256685615996496	0.131707381093004	0.0209257974107671	90
0	-0.0670804578333058	0.0192299655522547	0.00455342881549197	29		0	0.1734421453397	0.0289147607646983	0.0642440305262147	59		0	0.1734421453397	0.0289147607646983	0.0642440305262147	59		1	0.204641129943308	0.127210781103982	0.0187369249305849	77
1	0.56362283522695	0.469198305236594	0.0655810618420857	80		0	0.196279609042729	0.0951742240391901	0.10603286526311	68		0	0.196279609042729	0.0951742240391901	0.10603286526311	68		0	0.231288186855977	0.120302021422119	0.0479467846046012	73
0	0.217411676231921	0.112666158878901	0.0827011419942787	54		0	0.249364940409173	0.113523930757855	0.00566820805960366	85		0	0.249364940409173	0.113523930757855	0.00566820805960366	85		0	-0.165017621610824	0.0066431701476237	0.0129632038374321	8
0	0.391948590455154	0.232386529309093	0.162401403126275	70		1	0.581654579534531	0.15508533872494	0.987996302757894	80		1	0.581654579534531	0.15508533872494	0.987996302757894	80		0	0.842386952887961	0.0701334574258847	0.993897277060273	62
0	0.202975244706633	0.112750208042602	0.0316198415010624	76		0	0.363975068536363	0.13593788287458	0.366821310867916	73		0	0.363975068536363	0.13593788287458	0.366821310867916	73		0	0.282571280212303	0.234811807755196	0.0217092730202614	93
0	0.283291779471758	0.167232298207723	0.0310139258227126	57		0	0.300329007131071	0.129353809408689	0.222523636287802	73		0	0.300329007131071	0.129353809408689	0.222523636287802	73		0	-0.0125005649192417	0.0210615678435888	0.0184895458962264	33
0	0.250694663046788	0.0797616821790304	0.652417145271694	60		0	0.353404792925311	0.161833191257271	0.451876202125459	83		0	0.353404792925311	0.161833191257271	0.451876202125459	83		0	0.0630880260603434	0.0327587331111311	0.0264873705763022	42
0	0.305182917328735	0.124153810599221	0.174500663345452	64		0	0.278945425158681	0.0611157722897367	0.838867273354808	53		0	0.278945425158681	0.0611157722897367	0.838867273354808	53		0	0.286032663702009	0.159280777294297	0.0717650567368279	83
0	0.194826344083165	0.139366488314182	0.0663815357340907	65		0	0.252480979057495	0.0843319902900971	0.29169730148773	62		0	0.252480979057495	0.0843319902900971	0.29169730148773	62		0	0.200545360797118	0.113742066405286	0.0122309984876576	83
1	0.34703910052839	0.305640428775965	0.0923398764013751	78		1	0.34900773765966	0.190387991450471	0.32537401102472	85		1	0.34900773765966	0.190387991450471	0.32537401102472	85		0	-0.0283465523551572	0.0321231031556747	0.0114948896779548	42
0	0.434451443739061	0.197703063410935	0.690796380335288	68		0	0.178377975071471	0.0769816511289789	0.0714542788176855	61		0	0.178377975071471	0.0769816511289789	0.0714542788176855	61		0	0.291809571766955	0.14440734548565	0.0524284453232098	69
0	0.297321335138314	0.160262669031099	0.0633401472278219	82		0	0.305707670807966	0.153680448815833	0.216036867776483	60		0	0.305707670807966	0.153680448815833	0.216036867776483	60		1	0.331875866999308	0.231015372103861	0.0438344003765963	89
0	0.285418119592653	0.206839564251845	0.0288265591934943	83		0	0.117559042454551	0.0461532621638273	0.130204264257197	56		0	0.117559042454551	0.0461532621638273	0.130204264257197	56		0	-0.13873234745154	0.00811316649420836	0.0137831781474838	12
0	0.207923490375215	0.124956874042284	0.0248051037377328	73		0	0.0591697588932326	0.0595041126426151	0.0223244818524871	75		0	0.0591697588932326	0.0595041126426151	0.0223244818524871	75		0	0.119980674753468	0.0791066061597461	0.0257031525696057	63
0	0.111331645919317	0.0643481773257339	0.06679747803639	48		0	0.280932548537093	0.0827236376744069	0.031438100834563	73		0	0.280932548537093	0.0827236376744069	0.031438100834563	73		0	-0.00424840255028549	0.0224053279863098	0.0188470735435807	34
1	0.0966723969436214	0.0342639122634786	0.00987729768252354	67		0	0.058949154460684	0.0305289203570891	0.0354531972671001	51		0	0.058949154460684	0.0305289203570891	0.0354531972671001	51		0	0.382696842996772	0.324026785703727	0.0582819610058768	90
0	0.103507038567039	0.0311630652929768	0.00475813540974869	69		0	0.266695087114416	0.0932636861717239	0.258465812704019	68		0	0.266695087114416	0.0932636861717239	0.258465812704019	68		1	0.404182400814393	0.360699222735381	0.0469174316558766	98
0	0.258549797839676	0.0298462218351248	0.869287122455269	34		0	0.207931915896147	0.137467298502124	0.00436011187896753	91		0	0.207931915896147	0.137467298502124	0.00436011187896753	91		0	0.053346861905712	0.0602611375755897	0.0331485045915457	60
0	0.32409207754246	0.198306730947854	0.02435551579706	98		1	0.307474181067772	0.10993721170229	6.10782569715082e-19	70		1	0.307474181067772	0.10993721170229	6.10782569715082e-19	70		1	0.637092230473826	0.354423433941532	0.857544806195338	89
0	0.0970050406382922	0.0262901495948022	0.0187360884852908	45		0	0.188925215435899	0.10412825647026	0.0478177786534671	69		0	0.188925215435899	0.10412825647026	0.0478177786534671	69		0	-0.140744284212946	0.0122442861319731	0.00152780454944157	38
0	0.0463493297302492	0.0633305346633923	0.020236884541893	50		0	0.285642623651135	0.172483982371311	8.73570683904055e-07	86		0	0.285642623651135	0.172483982371311	8.73570683904055e-07	86		0	0.275441419648388	0.254552182471351	0.020116504630466	84
0	0.214544841838225	0.151749616772439	0.0207909793436539	69		0	0.00086472856234902	0.0411866768709756	0.00167889033614523	72		0	0.00086472856234902	0.0411866768709756	0.00167889033614523	72		0	-0.210700408908292	0.00469060960186041	0.0116511254168726	0
0	0.434710891124891	0.266168421176317	0.0620803242781155	71		1	0.251900632912483	0.124908928595278	0.091289164244924	76		1	0.251900632912483	0.124908928595278	0.091289164244924	76		0	0.329259689118562	0.199202516108416	0.100643872317062	75
0	0.144474559778157	0.0673023746216912	0.00723474647542879	72		0	0.235873491583619	0.0555144970718532	0.088235535392376	56		0	0.235873491583619	0.0555144970718532	0.088235535392376	56		0	0.322503146391013	0.155961418925992	0.0395337146074376	91
0	0.214448553179251	0.108774344246027	0.14943327166097	53		0	0.428430318546848	0.172541786618015	0.897175983363246	68		0	0.428430318546848	0.172541786618015	0.897175983363246	68		0	0.314097592910961	0.166758816253831	0.0298308106443302	87
0	0.147264212755046	0.114293756984191	0.0866796214775709	71		0	0.294228420319308	0.079780973268775	0.263237040416225	76		0	0.294228420319308	0.079780973268775	0.263237040416225	76		0	-0.0983777812660633	0.0143382065554744	0.00785317844622407	30
0	0.277052068590378	0.136126601584791	0.0254937671829548	77		0	0.391917415020134	0.248158504995166	0.280100913271705	90		0	0.391917415020134	0.248158504995166	0.280100913271705	90		0	0.00969150519647686	0.0248678240049346	0.0194664845822338	37
1	0.33432657688466	0.230929640318621	0.0442587040214821	84		1	0.188309504691209	0.136230064309211	0.043210044027848	77		1	0.188309504691209	0.136230064309211	0.043210044027848	77		0	-0.315255031725864	0.00415553324036488	0.0041546205217754	0
0	0.272357672316227	0.153210495489839	0.0164845151676213	56		1	0.824144591671637	0.3298201042419	0.985667413244148	85		1	0.824144591671637	0.3298201042419	0.985667413244148	85		0	-0.016906101801473	0.020376799661548	0.0183014077768416	32
0	0.261990392996755	0.154517004293848	0.173340471416482	57		0	0.0873170952749449	0.0451886080980971	0.0592032927121953	46		0	0.0873170952749449	0.0451886080980971	0.0592032927121953	46		0	0.298163500626967	0.143435459591636	0.0550791446193582	80
0	0.0798080099932052	0.052573376954785	0.00782143377543259	50		0	-0.0164977992732688	0.00997178123966719	0.01431926152571	46		0	-0.0164977992732688	0.00997178123966719	0.01431926152571	46		0	-0.0799503697442175	0.0125715852047352	0.00759115164076242	37
1	0.143919658177322	0.0621319653617984	0.000926836685501529	46		0	0.365280421701358	0.208992180966908	0.230131308587973	83		0	0.365280421701358	0.208992180966908	0.230131308587973	83		0	0.191495440479183	0.0521455627694962	0.0123475753937613	79
0	0.291590064992764	0.185794882473068	0.0839741776186942	68		0	0.364707729173014	0.166162352042604	0.0468021283241868	80		0	0.364707729173014	0.166162352042604	0.0468021283241868	80		0	0.521745539547146	0.0331980187185208	0.127782927886539	54
0	0.170785750430813	0.109735339419383	1.48721600426794e-09	66		1	0.339612134115139	0.117930866804258	0.0293737256692014	79		1	0.339612134115139	0.117930866804258	0.0293737256692014	79		0	0.177769233937877	0.0465674786509775	0.0279616605800827	75
0	0.224862841250551	0.150749521127453	0.0633262433808695	61		0	0.29650526996075	0.114177828424773	0.104713669932498	77		0	0.29650526996075	0.114177828424773	0.104713669932498	77		0	-0.152258066631894	0.0214407618208772	0.00569083517636451	31
0	0.277518455784628	0.199211394286497	0.0350642333922437	69		0	0.417843316331148	0.268269755356549	0.257655707154064	87		0	0.417843316331148	0.268269755356549	0.257655707154064	87		1	0.688096705539351	0.134260641173126	0.934980590657246	68
0	0.207190994983669	0.114920933284709	0.0348274710760617	64		0	0.268083695515013	0.116157152301821	1.83172757398117e-07	58		0	0.268083695515013	0.116157152301821	1.83172757398117e-07	58		0	0.603035950705302	0.102477101728108	0.0517245754975135	72
0	0.48875903076645	0.154046445140323	0.0573775798535584	72		0	0.449912649237913	0.159526886656044	0.243490207733536	77		0	0.449912649237913	0.159526886656044	0.243490207733536	77		0	0.288923584696321	0.129242491679753	0.0102674637455693	84
0	0.404824173020178	0.322443925889502	0.00361590794436015	81		0	0.114411037767398	0.0577460217691659	0.0085676441923987	81		0	0.114411037767398	0.0577460217691659	0.0085676441923987	81		0	0.404457188260395	0.0268637951924767	0.0345996368148746	55
0	0.393436977235504	0.302449780597617	0.233805780187905	86		0	0.378222127904256	0.238559437397314	0.0302128900563174	85		0	0.378222127904256	0.238559437397314	0.0302128900563174	85		0	0.261482591446249	0.119400015987586	0.0772639330605364	70
0	0.24865297049001	0.118759494243068	0.192175593544587	52		0	0.360191647923665	0.1977730227083	0.314317748779028	73		0	0.360191647923665	0.1977730227083	0.314317748779028	73		0	0.638002662625459	0.304395051406781	0.128775364847145	94
1	0.373257996076928	0.302208775516749	0.107475320898628	80		0	0.0418025065807378	0.0203657389127191	0.0412876793510527	43		0	0.0418025065807378	0.0203657389127191	0.0412876793510527	43		0	-0.0991329841721615	0.0133051489101709	0.00934324910930243	44
0	0.181088839975789	0.0705124473312341	0.0524690955902774	54		0	0.176444730971022	0.0671437062089716	0.0604235126579983	56		0	0.176444730971022	0.0671437062089716	0.0604235126579983	56		0	0.0905829114053184	0.0422353708562216	0.0353834659778697	69
0	0.574136535060421	0.181686778813417	0.388327290808092	92		0	0.187129350446215	0.106875801477085	0.0157933966793354	79		0	0.187129350446215	0.106875801477085	0.0157933966793354	79		0	0.470179284031101	0.251649284230876	0.500399393084029	93
1	0.180490703433042	0.100981193620374	0.00869450174708257	76		0	0.238220866790579	0.146022145018787	0.0448702622893361	55		0	0.238220866790579	0.146022145018787	0.0448702622893361	55		0	0.356900235486641	0.128536727486691	0.174556265822807	79
0	0.2914062135408	0.119355493793512	0.179147313701448	59		0	0.174638680670139	0.0764490169806552	0.0216568448986339	76		0	0.174638680670139	0.0764490169806552	0.0216568448986339	76		0	0.386998662204465	0.173637837151742	0.0719601003480744	85
0	0.0787120478095483	0.0425477537382778	0.012835772740334	52		0	0.239180290693011	0.045184341998582	0.763919559397337	50		0	0.239180290693011	0.045184341998582	0.763919559397337	50		0	0.140908963490104	0.101960769577152	0.00992520907807996	70
1	0.743317632725946	0.556283242994147	0.794491544858833	92		1	0.295323948068342	0.10900191222766	0.00685794472266447	95		1	0.295323948068342	0.10900191222766	0.00685794472266447	95		0	0.0171797633491952	0.0380890653025084	0.0208959247004566	48
0	-0.159988668290471	0.00978025643745177	0.0118030865144155	32		1	0.433355809262099	0.192357611328279	0.345237874105069	93		1	0.433355809262099	0.192357611328279	0.345237874105069	93		0	0.297602736148374	0.15034245455524	0.023210530935777	73
0	0.247549617435089	0.165483755401165	0.0177457015048202	88		0	0.0820438534962329	0.0423206104796292	0.00726530686172485	62		0	0.0820438534962329	0.0423206104796292	0.00726530686172485	62		0	0.294460723782084	0.142951559885703	0.0532193778894541	78
1	0.730959227607706	0.438682319933647	0.345171588280709	96		1	0.461106314974037	0.235167622316582	0.690004231597306	83		1	0.461106314974037	0.235167622316582	0.690004231597306	83		0	-0.0914345583531109	0.00728287205600976	0.0200550961147899	22
0	0.25019906081041	0.153827445133449	0.311988136810381	60		0	0.102581696763747	0.0431830720600887	0.0892900893513912	60		0	0.102581696763747	0.0431830720600887	0.0892900893513912	60		0	0.262746071881728	0.0951511491568602	0.0602106584541381	67
0	0.118151703082456	0.140262085345235	0.0102705309878322	70		0	0.317372096050461	0.0803592495658895	0.665671070460837	60		0	0.317372096050461	0.0803592495658895	0.665671070460837	60		0	0.0728168525917667	0.0555099289267754	0.00513066332180127	63
0	0.410104814440057	0.156227846595494	0.180321929324867	88		0	0.107673690584237	0.0476207299431469	0.0677177098333042	63		0	0.107673690584237	0.0476207299431469	0.0677177098333042	63		0	0.171782618608625	0.0527453054961761	0.296121095961324	49
0	0.324510321270925	0.124530977724482	0.662428454263456	66		0	0.175138613906675	0.0783014321589175	0.341610856618783	61		0	0.175138613906675	0.0783014321589175	0.341610856618783	61		0	0.361169756066962	0.251775800838832	0.0565606359223832	92
0	0.155181731480028	0.113000129849834	0.00435874898527787	65		0	0.386500111609261	0.170699729441209	0.0752623603804275	70		0	0.386500111609261	0.170699729441209	0.0752623603804275	70		1	0.358281528321976	0.133195077516297	0.104838440805944	84
0	0.358846012530491	0.21570041166333	0.234021893149136	78		0	0.327087860863456	0.101754955866695	0.0812707842356285	67		0	0.327087860863456	0.101754955866695	0.0812707842356285	67		0	0.224237519022309	0.0452125562429853	0.264749029972595	60
0	0.483233986632484	0.243080334850173	0.733262977260162	74		0	0.0831491281149112	0.0402709698581556	3.39944782102017e-10	44		0	0.0831491281149112	0.0402709698581556	3.39944782102017e-10	44		0	0.388967094715108	0.256045228282519	0.147432706152177	86
0	0.2971475320533	0.164088066484072	0.0872724239451028	85		0	0.0552942016826322	0.0138619569741081	0.0775003948469945	36		0	0.0552942016826322	0.0138619569741081	0.0775003948469945	36		0	0.381649674804924	0.203937215587101	0.204998025034144	85
0	-0.00826428161586691	0.016503959688634	0.0164514089841804	43		0	0.00247658698885502	0.0242714016740491	0.0203234929597788	55		0	0.00247658698885502	0.0242714016740491	0.0203234929597788	55		0	0.27209010060594	0.143588371752104	0.0554451051749811	78
0	0.569161942705654	0.26717780193071	0.891038796670532	86		0	-0.00961769355901401	0.0157650010489882	0.168988085936747	24		0	-0.00961769355901401	0.0157650010489882	0.168988085936747	24		0	-0.402488252129259	0.00267080378599659	0.00119510782389672	0
0	0.36629129798365	0.130362345789032	0.690796380335288	68		0	0.314752621299894	0.13722031719443	0.0755251709250541	82		0	0.314752621299894	0.13722031719443	0.0755251709250541	82		0	0.227622602645496	0.0921638844075738	0.00499353567673449	91
0	0.17025302065712	0.0616023761053308	0.298366222527441	56		0	0.143559511912419	0.0784804358173525	0.0339428778461595	82		0	0.143559511912419	0.0784804358173525	0.0339428778461595	82		0	0.129570650155111	0.0888453840740049	0.0183839068617916	68
1	0.362012302101676	0.21046506384546	0.233214241339205	86		1	0.351366941713191	0.10879621813415	0.11421771005619	89		1	0.351366941713191	0.10879621813415	0.11421771005619	89		0	-0.0880083536254727	0.0109706697011895	0.0224829172447743	24
0	0.189702599813646	0.0790799846195378	0.0641394466595482	50		0	-0.000621557338259851	0.0158490719224531	0.153159057255727	40		0	-0.000621557338259851	0.0158490719224531	0.153159057255727	40		0	0.166927285150678	0.100143083754292	0.0161640536701931	78
0	-0.065027025761138	0.0100960199603401	0.0127125954576792	42		0	0.353877024197969	0.228982400208055	0.322679955846653	87		0	0.353877024197969	0.228982400208055	0.322679955846653	87		1	0.13746188430427	0.0652899617206727	0.0104766821962269	62
0	0.112089362213948	0.057354753411509	0.0150895106952303	63		0	0.260966327097414	0.0723836397081115	0.683619112875351	64		0	0.260966327097414	0.0723836397081115	0.683619112875351	64		0	0.716723237400506	0.273396338878309	0.0199316182087582	41
1	0.376812207325797	0.163533007171508	0.133027323219547	83		0	-0.0489714151158162	0.0182772745865613	0.0329191116542945	44		0	-0.0489714151158162	0.0182772745865613	0.0329191116542945	44		0	0.345262246065721	0.105718551756039	0.175792989823762	80
0	0.189716246682383	0.12163910843799	0.0239440531570532	72		0	0.158163893457015	0.0583763250294436	0.016155061164945	69		0	0.158163893457015	0.0583763250294436	0.016155061164945	69		0	-0.00653336384368166	0.0220250811270622	0.0187474034799531	34
0	0.181844285035422	0.0666902398663125	0.182361561108405	69		0	-0.127368821764025	0.00798264871344763	0.0110516549287348	32		0	-0.127368821764025	0.00798264871344763	0.0110516549287348	32		0	0.343264387958374	0.228207896508676	0.0604871587363298	78
0	0.353398890006167	0.145241324043039	0.154229940458704	86		0	0.253255833650255	0.125836437888436	0.108937257071018	73		0	0.253255833650255	0.125836437888436	0.108937257071018	73		0	-0.351100258052418	0.00249830444983699	0.00177353165169067	0
0	-0.0755476991803504	0	0.00635846247323628	34		0	0.386164531101415	0.163485544382011	0.00164797968835117	96		0	0.386164531101415	0.163485544382011	0.00164797968835117	96		0	0.0315969571108617	0.0361694280941406	0.0219305451821797	56
0	0.166147706531883	0.0585263672177522	0.00708231511906205	85		0	0.579163914847172	0.177717229651028	0.823051796863931	74		0	0.579163914847172	0.177717229651028	0.823051796863931	74		1	0.56854987768271	0.223916226256364	0.433940740581435	69
0	0.134883745942461	0.0808276926997224	0.00942156428008989	68		0	0.27932651796215	0.117195685520983	0.173843332958443	59		0	0.27932651796215	0.117195685520983	0.173843332958443	59		0	-0.104392667724811	0.0184644304003931	0.0266364791341207	30
0	0.183549759444476	0.110020972021907	0.0719524880465355	83		0	0.0447279419940835	0.0115181498527217	0.0188225107997465	60		0	0.0447279419940835	0.0115181498527217	0.0188225107997465	60		0	-0.00541554105266763	0.0222103064954965	0.0187960981712788	34
1	0.3812257080773	0.147639331857259	0.147927814448363	86		0	0.188727652552666	0.0679038715767768	0.0029831439460816	79		0	0.188727652552666	0.0679038715767768	0.0029831439460816	79		0	0.503853296986778	0.318851064173109	0.0248021292240627	96
0	0.268965813309972	0.0706368573472891	0.090756823677529	73		0	0.648408080210509	0.370141542731002	0.980930475165082	103		0	0.648408080210509	0.370141542731002	0.980930475165082	103		0	0.202002453388612	0.0993997636471712	0.014503536276246	87
0	0.334588376530465	0.0985876139195788	0.359390179775947	65		1	0.546490737856582	0.220595564419529	0.35173992415838	94		1	0.546490737856582	0.220595564419529	0.35173992415838	94		0	0.076638593831406	0.0250436680911925	0.0131159152247542	59
1	0.361349854931793	0.262506123554561	0.392715030623905	83		0	0.177286803082448	0.0571954432566626	0.0446778895600952	78		0	0.177286803082448	0.0571954432566626	0.0446778895600952	78		1	0.596435339669887	0.292851951696286	0.903440103435408	76
0	-0.0273216591622644	0.0243328450259058	0.0190538400462459	39		0	0.166528605983808	0.0537018092940342	0.255098183238956	45		0	0.166528605983808	0.0537018092940342	0.255098183238956	45		0	0.522630075933576	0.287309936699467	0.255947010198553	101
1	0.358825657632009	0.217367420314673	0.105538331256311	91		0	0.319321098823298	0.199639154935263	0.114479999095666	88		0	0.319321098823298	0.199639154935263	0.114479999095666	88		0	0.359365700410632	0.233527916462193	0.146939732447255	88
0	0.100644297218015	0.0477772661363464	0.00606562909493662	63		1	0.741616269463307	0.23337273238733	0.64366937198415	96		1	0.741616269463307	0.23337273238733	0.64366937198415	96		0	0.181359475989364	0.0919519057780862	0.0163827233365083	73
0	0.359795364248744	0.219676850655059	0.0658277760347276	93		0	0.0749160771896039	0.0434505542443416	0.00501752711152092	60		0	0.0749160771896039	0.0434505542443416	0.00501752711152092	60		1	0.377218426299995	0.164663562301817	0.168404662421664	86
0	0.0705172549757022	0.0419479266998434	0.0302737176491169	65		1	0.529196063585565	0.331903433622794	0.422951716343481	81		1	0.529196063585565	0.331903433622794	0.422951716343481	81		0	0.14308723707585	0.0622707477275158	0.0132131716432184	74
0	0.246755669921583	0.130737769996604	0.230224868146765	73		0	-0.00737704270897147	0.0332971330571696	0.00907641693160359	45		0	-0.00737704270897147	0.0332971330571696	0.00907641693160359	45		0	-0.346606711651727	0.00364292610695729	0.00187026814503819	2
0	0.142403747417224	0.0382073337875559	0.23448322076535	53		1	0.185287558436222	0	0.0309336073523422	71		1	0.185287558436222	0	0.0309336073523422	71		0	-0.075673991181987	0.0130863791622014	0.0159645177074108	22
0	0.258053619972293	0.110063706068606	0.0119832132133544	94		0	-0.00655802169936583	0.0220210123407132	0.0261794713674315	34		0	-0.00655802169936583	0.0220210123407132	0.0261794713674315	34		0	0.24892083186313	0.127271919276485	0.0163542043358398	87
1	0.358478442188196	0.248013879252531	0.158471393043516	94		1	0.23238711706234	0.037152973209292	0.0810154325959895	59		1	0.23238711706234	0.037152973209292	0.0810154325959895	59		0	-0.172628847835935	0.00689379896608039	0.0018668080150227	39
1	0.486205475283106	0.33171852255153	0.143898972711335	89		0	0.563853944130091	0.235837182647577	0.895252224044609	90		0	0.563853944130091	0.235837182647577	0.895252224044609	90		0	0.361621190556499	0.102478734762756	0.431873001486215	58
0	0.250606723690143	0.118317241620364	0.0470842951708341	80		0	0.217267843821404	0.100285773001822	0.0672268119257355	83		0	0.217267843821404	0.100285773001822	0.0672268119257355	83		1	0.553047640479781	0.168998740399375	0.843705307547143	67
0	-0.0161484395748799	0.0278360303091021	0.0136044443455009	52		0	0.0381101615013425	0.0382373340257991	0.00419031639016889	58		0	0.0381101615013425	0.0382373340257991	0.00419031639016889	58		0	0.110393298016986	0.0522662411772028	0.0125104318703835	56
0	0.0868128497745507	0.146971143234906	0.0683201236040191	88		0	0.0257444612287457	0.0101132285263997	0.0559991793137498	35		0	0.0257444612287457	0.0101132285263997	0.0559991793137498	35		1	0.150010633026658	0.0579956217132631	0.0281429909921826	57
1	0.687706010061774	0.253506713484446	0.409099598696126	89		0	0.0062498598953722	0.0367464519634087	0.0539718395014991	47		0	0.0062498598953722	0.0367464519634087	0.0539718395014991	47		0	0.205280603015595	0.091906755306104	0.0294866211453799	67
1	0.335967069648557	0.189687211775653	0.0615717108892503	86		0	-0.0479858094918053	0.0252075052815493	0.00769148707905153	40		0	-0.0479858094918053	0.0252075052815493	0.00769148707905153	40		0	-0.177495699119761	0.00377370726657019	0.0141786788432066	14
0	0.0603715539261707	0.0223609993250896	0.231636784035467	65		0	0.199034993799163	0.136101078979612	0.00520027505140846	75		0	0.199034993799163	0.136101078979612	0.00520027505140846	75		1	0.220019480456325	0.137705324423138	0.0411151255298496	77
1	0.438946866760461	0.363323291130977	0.207515170235213	84		0	0.147169681327681	0.0862964732885339	0.0709438857555887	69		0	0.147169681327681	0.0862964732885339	0.0709438857555887	69		0	0.107180804563649	0.055514001038186	0.0497516182395603	53
0	0.172755244646622	0.0506568037333157	0.121474356249887	56		1	0.456220127644509	0.217583307655661	0.104445290337257	84		1	0.456220127644509	0.217583307655661	0.104445290337257	84		0	0.323654828273641	0.146481550250941	0.206408834899631	67
0	0.128973527828497	0.0572021462608804	0.0167287681573997	62		0	0.243216505800645	0.0626441550272302	0.0696011124723903	77		0	0.243216505800645	0.0626441550272302	0.0696011124723903	77		0	0.336212192689638	0.195324539048544	0.0125673441734276	94
0	0.274700769104845	0.126329308386214	0.00472592935439052	84		0	0.138464524371762	0.0831596267471257	0.0944433274979452	61		0	0.138464524371762	0.0831596267471257	0.0944433274979452	61		0	0.423190785545773	0.157622532550644	0.637227255649408	86
1	0.495249582172423	0.273045921784808	0.435575659617851	92		0	0.455148209829916	0.283553526732106	0.223731825914729	95		0	0.455148209829916	0.283553526732106	0.223731825914729	95		0	0.243139131647787	0.133306900526449	0.0404763345070923	59
1	0.286364914420588	0.114961539882242	0.0268766513170378	86		0	0.255967324073598	0.108543555878477	0.143470426730815	92		0	0.255967324073598	0.108543555878477	0.143470426730815	92		0	0.068451788820736	0.0488561067695031	0.0175727864797695	70
0	0.32161887857736	0.279025090168831	0.130759064343906	90		1	0.497811575653324	0.359858638145243	0.131446424964802	97		1	0.497811575653324	0.359858638145243	0.131446424964802	97		0	0.586294667360789	0.333389659584776	0.610237744172798	101
0	0.307858313362748	0.167112804728577	0.0607110791838281	75		0	0.103160778263531	0.0689888435919006	0.00564895398468073	62		0	0.103160778263531	0.0689888435919006	0.00564895398468073	62		0	0.135851754351521	0.0683736252530481	0.0143632674530806	63
1	0.295622948472198	0.161267676964916	0.148491480798519	89		0	0.123048962284622	0.0903593660142976	0.00491014328952309	67		0	0.123048962284622	0.0903593660142976	0.00491014328952309	67		0	0.0770927595319087	0.107316363970174	0.00393614266918543	72
0	0.190434708171855	0.116679549992608	0.0505186690119029	83		0	0.422094219087118	0.124506192686863	0.3641492819922	85		0	0.422094219087118	0.124506192686863	0.3641492819922	85		0	0.366983287897318	0.184160325193548	0.0325118524917251	92
0	0.408839879637145	0.200273569252073	0.598694887915093	68		0	-0.0464213190717424	0.00916708942064005	0.0101615584658215	48		0	-0.0464213190717424	0.00916708942064005	0.0101615584658215	48		0	0.0697812146260056	0.0692358512005738	0.00942907812455043	59
1	0.411312681029661	0.292970459695865	0.183658620044572	86		0	0.237767693537848	0.0896472152950327	0.0389207285877733	74		0	0.237767693537848	0.0896472152950327	0.0389207285877733	74		0	0.482384614001638	0.257072232175185	0.132194884734892	90
0	0.0711869964430677	0.0361341567822071	0.0793396692747106	46		0	0.118709210368097	0.0949734085873412	0.00852855741797297	62		0	0.118709210368097	0.0949734085873412	0.00852855741797297	62		0	0.299361922236691	0.108051730680598	0.017598712780363	90
1	0.463856259245706	0.311231844108856	0.735453462401807	90		0	0.256113051885878	0.080405668601043	0.0774145740102347	87		0	0.256113051885878	0.080405668601043	0.0774145740102347	87		0	0.221014134369904	0.0975241556335178	0.0271331937508896	81
1	0.521870618331094	0.226267704304916	0.33247594471463	93		0	0.504280146518885	0.259807342023152	0.00991947858416	87		0	0.504280146518885	0.259807342023152	0.00991947858416	87		0	-0.0223715044863005	0.0203265806612968	0.0280842719547648	32
1	0.589714675747308	0.241535434155436	0.681477076173206	95		1	0.220661502788998	0.095032730532952	0.00245260260154381	85		1	0.220661502788998	0.095032730532952	0.00245260260154381	85		0	-0.203518036527502	0.00264924038900857	0.00472777957019714	0
0	-0.016370444933756	0.0212456126925275	0.00315432979478766	44		0	0.373084951709337	0.2428689246682	0.326653535891546	88		0	0.373084951709337	0.2428689246682	0.326653535891546	88		0	0.197994647608213	0.050232800045767	0.0149721586669119	77
0	0.408141694567643	0.137610594879902	0.534115929210035	75		0	0.118668119644623	0.0663139886387317	0.0102932849402251	72		0	0.118668119644623	0.0663139886387317	0.0102932849402251	72		1	0.133397388197578	0.0760014576095841	0.0133096562036921	58
0	0.422177844084717	0.12854096809136	0.704546561852645	77		0	0.364473288529862	0.226953489375054	0.0512640480230642	88		0	0.364473288529862	0.226953489375054	0.0512640480230642	88		0	0.378935592042406	0.201983969936533	0.199982507979636	73
0	0.282353187644092	0.164002457893731	0.144120490532859	82		1	0.314197297714457	0.095326514608079	0.0365511822498911	85		1	0.314197297714457	0.095326514608079	0.0365511822498911	85		0	-0.0381596276849581	0.0186265470615935	0.0284088850882928	34
0	0.473577794041044	0.278635384500346	0.844282026337694	78		0	0.15892662877818	0.0889247296542325	0.0894608402603727	77		0	0.15892662877818	0.0889247296542325	0.0894608402603727	77		0	0.266379791915905	0.175982169275556	0.0213900781457908	85
0	0.0240116763204706	0.026504577735929	0.012822025382766	65		0	0.438602952750961	0.0660844384717618	0.985458495681189	61		0	0.438602952750961	0.0660844384717618	0.985458495681189	61		0	0.266216835873588	0.200843193093076	0.0200146601589178	94
0	0.191647704436935	0.0595302479106353	0.199851632395595	65		0	0.327739611429789	0.0728243550990353	0.0225346015913263	60		0	0.327739611429789	0.0728243550990353	0.0225346015913263	60		0	-0.196826255443354	0.00521391473587582	0.012035093043293	2
0	0.243590470934735	0.106025921531126	0.210599941277841	67		0	0.176125324817717	0.0675479435305247	0.0472387455220616	79		0	0.176125324817717	0.0675479435305247	0.0472387455220616	79		0	0.233013347279298	0.109591220654623	0.022983234859836	86
1	0.263441427675352	0.116939436574303	0.066363998953449	75		0	-0.0600403124911972	0.0136237152037071	0.0232067933206048	30		0	-0.0600403124911972	0.0136237152037071	0.0232067933206048	30		0	-0.12003509678671	0.019263783982799	0.00321194049133988	41
0	0.207689770271489	0.0999605483587914	0.186082646761186	77		1	0.314853740480297	0.113191985538516	0.0638942048051036	68		1	0.314853740480297	0.113191985538516	0.0638942048051036	68		0	0.232165051611498	0.107412254363484	0.0719073659285487	76
0	0.279085787898603	0.122198618482453	0.273442767734576	71		1	0.321944338238022	0.101405150300938	0.290629282846451	74		1	0.321944338238022	0.101405150300938	0.290629282846451	74		0	-0.114705361281411	0.0110180814619177	0.00797022409796827	38
0	0.26094632985491	0.110111655168708	0.174543594463589	77		1	0.316818427549864	0.168150418845223	0.103869577203165	80		1	0.316818427549864	0.168150418845223	0.103869577203165	80		0	0.405316025606761	0.0812302963638116	0.707836862236424	59
0	0.197385505516644	0.0595640662742335	0.0634629437890788	68		1	0.576617445215647	0.288393605055638	0.239770723984023	83		1	0.576617445215647	0.288393605055638	0.239770723984023	83		0	0.385179036759698	0.293213391486658	0.0641301897963271	98
0	0.182911507745953	0.0894539160467032	0.051825762119567	72		0	0.112237632482755	0.0541644771451277	0.02149322552011	61		0	0.112237632482755	0.0541644771451277	0.02149322552011	61		0	0.23963467986492	0.141173616617361	0.0168992478062773	90
1	0.212416497333021	0.107475519093236	0.131371548690323	75		0	0.0845505889493227	0	0.000904110982651778	69		0	0.0845505889493227	0	0.000904110982651778	69		1	0.207773276347426	0.0950844760170211	0.0196269404785341	79
0	0.128876252787185	0.0526678544896691	0.0019339306906505	72		0	0.328528919791214	0.130107658776653	0.0292002791612281	77		0	0.328528919791214	0.130107658776653	0.0292002791612281	77		0	-0.205750617318317	0.00549434757155467	0.0259808940713589	20
1	0.266943346852197	0.0892686116394841	0.317704765807765	77		0	0.115388851532381	0.0595631909761535	0.00232228444808038	64		0	0.115388851532381	0.0595631909761535	0.00232228444808038	64		0	0.416412039675735	0.153448033190836	0.330225909641797	90
1	0.344202610610842	0.135553452999313	0.309828132652361	75		0	-0.0110700168106224	0.0282231335258004	0.00037188389232783	36		0	-0.0110700168106224	0.0282231335258004	0.00037188389232783	36		0	0.369203502905701	0.0267694357323531	0.512959808147157	51
1	0.448152119661415	0.269372150050614	0.0897915445101322	94		0	-0.189621066723736	0.00679862534199376	0.000333500712447613	41		0	-0.189621066723736	0.00679862534199376	0.000333500712447613	41		0	0.246486331244425	0.0467465340048205	0.045810457431013	72
1	0.214722583781241	0.0606124425085854	0.0435967997828906	69		0	0.0688657985747331	0.0385027814566838	0.0107043723191541	60		0	0.0688657985747331	0.0385027814566838	0.0107043723191541	60		0	-0.112485048805968	0.0297421027188633	0.00281330532687893	41
1	0.585305175398024	0.385313391789861	0.788991825079243	79		0	0.138830839510928	0	0.00455760533315653	77		0	0.138830839510928	0	0.00455760533315653	77		1	0.465778941168671	0.251296621759818	0.124656744775404	90
0	0.35867089554632	0.157896073407094	0.0751229147573872	91		0	0.218916758403667	0.0726727454577386	0.00945976526372289	86		0	0.218916758403667	0.0726727454577386	0.00945976526372289	86		0	0.149335921398385	0.1225727661638	0.0132758171698363	74
1	0.327904189102818	0.160325257824808	0.0703541511667883	87		1	0.428455684629823	0.152818803826276	0.022742476108433	87		1	0.428455684629823	0.152818803826276	0.022742476108433	87		0	0.334774202410942	0.106941684862822	0.013298629598793	88
1	0.356396364793794	0.089206286598331	0.15008803517154	88		0	0.0658139761138643	0.0282080388156114	0.00542499834925457	68		0	0.0658139761138643	0.0282080388156114	0.00542499834925457	68		1	0.490952402741294	0.365411636505232	0.241391740283703	93
0	-0.156515379457774	0.00458066556294485	0.00455774144018652	30		0	0.16000768338609	0.0393423638160061	0.0851867596652361	74		0	0.16000768338609	0.0393423638160061	0.0851867596652361	74		0	0.465680085351764	0.129909758659604	0.0281023067848108	82
0	0.420730298119184	0.145393951506904	0.143711852852275	87		0	0.12255264701071	0.0355530732270832	0.00312576078903261	76		0	0.12255264701071	0.0355530732270832	0.00312576078903261	76		0	0.378393894314785	0.12864914853994	0.543849365523334	68
0	0.0121035479044079	0.0177744249310342	0.0274103942616987	44		0	0.161895501555701	0.0479270195863041	0.0374129026681729	67		0	0.161895501555701	0.0479270195863041	0.0374129026681729	67		0	0.441282758080551	0.0721595554773821	0.068215866875907	73
1	0.461996085642367	0.0799525427443822	0.0249367594263923	85		0	-0.0273733085539837	0.0133776448266626	0.000883312405776993	49		0	-0.0273733085539837	0.0133776448266626	0.000883312405776993	49		0	0.0213806163818989	0.0211213737582528	0.0351526972773912	33
0	-0.0557912900826962	0.0126767997471251	0.000984183116233232	43		0	0.237803884950287	0.0632738403805967	0.00860547515120242	86		0	0.237803884950287	0.0632738403805967	0.00860547515120242	86		0	0.18519476311614	0.0854640121650161	0.0268230758774446	62
0	0.267489806359713	0.0965057433925715	0.0441330870429964	91		0	0.115789302608992	0.0759999053033959	0.00152888743596546	79		0	0.115789302608992	0.0759999053033959	0.00152888743596546	79		0	0.0846628482246156	0.0543063317834992	0.0282322526290252	54
0	-0.174076024944433	0.00599832492338873	0.000551277995637869	28		0	0.0372589307262083	0.0168517674139975	0.0197571302301824	42		0	0.0372589307262083	0.0168517674139975	0.0197571302301824	42		0	0.239108429153573	0.199567557128195	0.027356184295089	85
0	0.0529272757368966	0.0429142269947724	0.00244262614147486	72		0	0.117813270229545	0.0889096112428691	0.00221101528672313	88		0	0.117813270229545	0.0889096112428691	0.00221101528672313	88		0	0.119123142749417	0.0421258089972559	0.027075216460349	64
0	0.113848740823066	0.0549126814436559	0.00958647870522747	77		1	0.314302576219016	0.189152976515027	0.0469266182597175	89		1	0.314302576219016	0.189152976515027	0.0469266182597175	89		0	0.289932814953904	0.10622650701375	0.0209349495676418	77
0	0.328553950519891	0.108741259705569	0.114710853407442	80		0	0.255567094196803	0.0969741796803916	0.000885676334077143	90		0	0.255567094196803	0.0969741796803916	0.000885676334077143	90		0	0.0483702676654057	0.0361146968965257	0.0609833298162547	15
0	-0.0317173691433415	0.0264030199779567	0.00827884164491817	48		0	0.149832282717517	0.0725701652666024	0.0148152823240042	57		0	0.149832282717517	0.0725701652666024	0.0148152823240042	57		0	0.228048307404565	0.0964371504536198	0.0191128364764147	87
0	0.15694566313546	0.0788678536312444	0.0416776209623923	69		0	-0.0413602943398629	0.0336496393855965	0.00186696972308667	57		0	-0.0413602943398629	0.0336496393855965	0.00186696972308667	57		0	0.0955020514016173	0.0580931055362306	0.0182808357687817	65
0	0.0631070333890545	0.0424922020121123	0.0279429404322867	50		0	0.264031198663537	0.117434665333199	0.0830963272333044	83		0	0.264031198663537	0.117434665333199	0.0830963272333044	83		0	0.247499963806957	0.148510685472079	0.0176688799415056	82
0	0.156952089640235	0.0305246360626845	0.00692546917511189	56		0	-0.101636159632331	0.0107832033386826	9.14132306820614e-05	46		0	-0.101636159632331	0.0107832033386826	9.14132306820614e-05	46		0	-0.0292021525026268	0.0185789018077835	0.0177861900049903	30
0	0.183481874976398	0.0471809900173378	0.00923954706755967	86		0	0.218479954923921	0.104260334836352	0.00251186708483087	86		0	0.218479954923921	0.104260334836352	0.00251186708483087	86		0	0.356639582921344	0.19822051549898	0.0412327960396182	92
0	0.0303462854169324	0.0327936481360376	0.00713664749136696	50		0	0.11767280147481	0.0543054979693215	0.0160881091099023	72		0	0.11767280147481	0.0543054979693215	0.0160881091099023	72		0	0.344838139665044	0.23374849814007	0.0381423343679194	79
0	-0.140305053378063	0.00526486356481455	0.00631093867504311	33		0	0.114690927676392	0.0296225280744479	0.00137840909199626	79		0	0.114690927676392	0.0296225280744479	0.00137840909199626	79		0	0.371061942855516	0.199421559697928	0.245398132207468	84
0	0.301094370922925	0.0990965429072223	0.115775322727691	68		0	0.197419623145199	0.10453444513612	0.0130881831572942	82		0	0.197419623145199	0.10453444513612	0.0130881831572942	82		0	0.234419167228549	0.0977777835825511	0.352375330757674	64
0	-0.121755423611315	0.0070300331468996	0.0067441694612496	33		0	0.109297930583279	0.0382987427537523	0.00828462369917074	75		0	0.109297930583279	0.0382987427537523	0.00828462369917074	75		0	0.196805415047446	0.0930361425088965	0.0213553496387173	83
0	0.0945816799401543	0.0445195051574908	0.0371025964022405	72		0	0.175331060960687	0.0557757013456883	0.0111321881753392	73		0	0.175331060960687	0.0557757013456883	0.0111321881753392	73		0	-0.146507791277269	0.00764756561410928	0.0135354341688882	11
0	0.425167391770808	0.115722612265082	0.0682178096157283	86		0	0.0103395280760303	0.0283907006743898	0.00816685569614096	56		0	0.0103395280760303	0.0283907006743898	0.00816685569614096	56		0	-0.210223690365065	0.00470769160777069	0.0116641155440763	0
0	0.373425830683444	0.128154636487731	0.27950406911639	77		0	-0.0402999076045389	0.017915671444085	0.0046588360394296	49		0	-0.0402999076045389	0.017915671444085	0.0046588360394296	49		0	0.415433189307438	0.0919915459837036	0.740992869954943	75
0	-0.0753838447784046	0.00598361729784904	0.0154212126422543	45		0	0.168572733957955	0.0464577528924689	0.0407129582757854	64		0	0.168572733957955	0.0464577528924689	0.0407129582757854	64		0	0.312020487604479	0.110583692911618	0.485046766732855	69
0	0.345819553620473	0.0941972891569852	0.16369633776072	67		0	0.0916849753579152	0.0666365238958802	0.0085754454232712	62		0	0.0916849753579152	0.0666365238958802	0.0085754454232712	62		0	0.264608096281561	0.139939446157873	0.0276518948069906	78
0	0.564008528560872	0.103040897964679	0.354099351923468	66		0	-0.180834868635076	0	0.000879492804298431	41		0	-0.180834868635076	0	0.000879492804298431	41		0	0.293285592633181	0.118690956133954	0.0119934093497826	88
0	0.205331866900696	0.0404367145914869	0.0361495057698141	45		0	0.344630659583355	0.185233142169306	0.149684092031053	82		0	0.344630659583355	0.185233142169306	0.149684092031053	82		0	0.289097143854749	0.0267254040739012	0.976651475190252	46
0	0.33711700542116	0.0876128554393393	0.0175627754570345	76		0	0.118803587515641	0.0839090305403468	0.0130692825019056	63		0	0.118803587515641	0.0839090305403468	0.0130692825019056	63		0	0.235267502211863	0.0697706363871358	0.10615293654103	66
0	0.0803391564700062	0.033459451720575	0.00512646180725281	60		0	-0.171074124467776	0.0143201071727162	0.000877783858612229	37		0	-0.171074124467776	0.0143201071727162	0.000877783858612229	37		0	0.25866134344749	0.0826036333645079	0.127340951056769	86
1	0.0609275586748509	0.0560680225489873	0.0870697534059465	60		0	0.0426229784199405	0	0.00270405809171242	52		0	0.0426229784199405	0	0.00270405809171242	52		0	-0.116863343056963	0.00933997308650703	0.0270475134957376	16
0	-0.114131451873683	0.0106192558221328	0.0120462566643772	29		0	0.017322382099992	0.0467033057662448	0.004926729872092	57		0	0.017322382099992	0.0467033057662448	0.004926729872092	57		0	0.40541280932533	0.0728434035955014	0.0609617946730587	63
0	0.2321866197898	0.0951814623404148	0.119705187466999	75		0	0.533674537821859	0.43255193794782	0.152547609985783	86		0	0.533674537821859	0.43255193794782	0.152547609985783	86		0	0.362526894373833	0.257644242518298	0.0672716507181823	94
0	0.0827426964113153	0.0187346634002811	0.0258128772657653	60		0	0.0105674167904027	0.0331244459694541	0.0017106189746171	55		0	0.0105674167904027	0.0331244459694541	0.0017106189746171	55		0	0.19969940559507	0.0891512424060563	0.0485979218778294	67
0	0.140728413941806	0.0490258534163224	0.00882528505983856	76		0	-0.0244741597253229	0.0382105071300053	0.00170947349581323	55		0	-0.0244741597253229	0.0382105071300053	0.00170947349581323	55		0	0.045692506647118	0.0241275172745515	0.00641509904181139	68
0	0.419586199231683	0.0831836113617195	0.107248478766212	80		0	0.240887435893261	0.0861404610344643	0.0119540990744855	60		0	0.240887435893261	0.0861404610344643	0.0119540990744855	60		0	-0.0164828383672366	0.013025242183407	0.0240697609822312	47
0	4.11931206131497e-05	0.0497636886741541	0.0237937719422118	58		0	0.0523626734842957	0.0584016807669207	0.0058031450344376	68		0	0.0523626734842957	0.0584016807669207	0.0058031450344376	68		0	-0.239518151655151	0.00501276485133156	0.00504980320413907	1
0	0.217648338740893	0	0.0185016590536762	91		0	0.567847830637799	0.202881712513117	0.626641416660062	91		0	0.567847830637799	0.202881712513117	0.626641416660062	91		0	0.314339577690051	0.058394435804668	0.609523486218623	62
0	0.176181170487141	0	0.00881269770979949	74		0	0.120086320356088	0	0.011870760621819	63		0	0.120086320356088	0	0.011870760621819	63		0	0.117463487256677	0.036597324730943	0.0953532168356763	37
1	0.280992144361293	0.165600532730865	0.0522772895824608	90		0	0.240337554494887	0.117860264723785	0.00864727705909556	86		0	0.240337554494887	0.117860264723785	0.00864727705909556	86		0	0.00588701253629432	0.0246882727971983	0.0625046003028205	37
0	-0.213380499707717	0.00304632105555323	1.15519090807217e-07	20		0	0.150318384940976	0.0731493645187808	0.00510856073602992	71		0	0.150318384940976	0.0731493645187808	0.00510856073602992	71		0	0.214954146424514	0.117560662727881	0.0317898589919889	74
0	0.262723091199631	0.129872700557914	0.011108611181254	73		1	0.466851893125982	0.410209403633544	0.111699494057461	94		1	0.466851893125982	0.410209403633544	0.111699494057461	94		0	-0.177264356600609	0.00605181524460275	0.0125977886229667	6
0	0.408023001034267	0.224928316536945	0.179402489964878	72		1	0.535778451842579	0.354496163661556	0.804367785045699	89		1	0.535778451842579	0.354496163661556	0.804367785045699	89		0	-0.209845603244575	0.00472128341842988	0.0116744282345955	0
0	0.40165517933149	0.252178315608321	0.351434211573148	76		0	0.118923929689204	0.0598853742658163	0.00588737711062057	76		0	0.118923929689204	0.0598853742658163	0.00588737711062057	76		0	-0.222308364584665	0.00568600307146181	0.00544583934225914	4
0	0.105112614816481	0.0996023032793922	0.0107086090637989	67		1	0.258502502784037	0.14429679055967	0.00462341783791918	88		1	0.258502502784037	0.14429679055967	0.00462341783791918	88		0	0.413788229162145	0.25906656023702	0.0768357691270545	91
0	0.162017777178941	0.064995427658498	0.0234653374390896	68		0	0.0976855410300689	0.0353456815075502	0.0206036752476223	62		0	0.0976855410300689	0.0353456815075502	0.0206036752476223	62		0	0.527439168106527	0.15519283000719	0.881101360571398	91
0	0.295474515265521	0.250247996554866	0.0272700646654358	81		0	0.265415099621817	0.183527421536912	0.0747927427044409	80		0	0.265415099621817	0.183527421536912	0.0747927427044409	80		0	0.223724714024503	0.0879734518196158	0.0783502036038149	70
0	0.298212219505557	0.169650851603128	0.091708947897958	64		0	-0.00224313250842574	0.025972296283411	0.00358846109826894	58		0	-0.00224313250842574	0.025972296283411	0.00358846109826894	58		0	0.347201702736808	0.173039751101509	0.104538659839755	71
0	0.137207699976598	0.0449311322656998	0.00477679168343709	68		0	0.163981051303874	0	0.0120170021037396	78		0	0.163981051303874	0	0.0120170021037396	78		0	0.336113812281614	0.225906691230648	0.0343467390374205	85
0	0.450474465324169	0.323398900058521	0.0591933680613638	90		0	0.233950163892636	0.090026309634517	0.111780386166922	75		0	0.233950163892636	0.090026309634517	0.111780386166922	75		0	0.300566443692601	0.110780878975308	0.023755586979963	70
1	0.589268207975619	0.510040029817843	0.124008656704893	90		1	0.453577657520287	0.220373507537022	0.48868671762307	89		1	0.453577657520287	0.220373507537022	0.48868671762307	89		0	-0.0815188332023064	0.0105344282963943	0.0529702820363182	30
0	-0.0165928136609232	0.0145834723567665	0.130918385981114	20		0	0.14899413823379	0.0653323027371538	0.00118373763923345	82		0	0.14899413823379	0.0653323027371538	0.00118373763923345	82		0	0.171027874319514	0.0991793112223382	0.0125863102902282	79
0	0.293437542681531	0.158897189173211	0.0473604137475234	67		0	0.37977386188746	0.257639244118507	0.253029253080154	95		0	0.37977386188746	0.257639244118507	0.253029253080154	95		0	0.282719965599931	0.0749343454312325	0.131917620958386	60
0	0.235669245635025	0.155699148426048	0.0167297256154657	75		0	0.312967272532613	0.19764433673882	0.065645374058909	89		0	0.312967272532613	0.19764433673882	0.065645374058909	89		0	0.165205126602302	0.0484981998674338	0.0159789861533022	43
0	0.22669416735025	0.136016637079932	0.0637810696470932	64		0	0.433660590326119	0.179311496292264	0.0603702299907988	88		0	0.433660590326119	0.179311496292264	0.0603702299907988	88		0	0.313092552277979	0.0809230193591654	0.0531484216613585	87
0	0.346745810422661	0.233458405361854	0.0219076150425528	71		0	0.040725630288276	0.0245731662779304	0.00628374282130474	56		0	0.040725630288276	0.0245731662779304	0.00628374282130474	56		0	0.111619713259455	0.0370392262314664	0.0847249069174774	62
0	0.121161473178699	0.0944238141735618	0.00984519367362856	49		0	0.261159167344373	0.0794968338055713	0.0333746023102028	91		0	0.261159167344373	0.0794968338055713	0.0333746023102028	91		0	0.236835880849362	0.117326454003455	0.0112989217689832	81
0	0.381051745481791	0.134292825402006	1.46405501123464e-05	80		0	0.192562487630881	0.0471691846225562	0.0291911242712932	70		0	0.192562487630881	0.0471691846225562	0.0291911242712932	70		0	0.04449672135999	0.0369933988417477	0.0116107349582297	58
0	0.293308289082484	0.213033739218719	0.117664923264546	69		0	0.276258152592507	0.161263659454352	0.0449037025580201	88		0	0.276258152592507	0.161263659454352	0.0449037025580201	88		0	0.290207007859543	0.17279257123712	0.0328178604600574	91
0	0.0430735993818326	0.0430614857875659	0.0320730062014246	52		1	0.466860991741016	0.071388238297415	0.331313835006765	85		1	0.466860991741016	0.071388238297415	0.331313835006765	85		0	0.28452073450406	0.137310014678023	0.0570835469082506	77
0	0.28262372441435	0.171505060491965	0.0199989275428382	69		0	0.0496144645763557	0.0261843743380078	0.00208996251299486	78		0	0.0496144645763557	0.0261843743380078	0.00208996251299486	78		0	0.101246884243324	0.0429621606574588	0.0169009029281012	53
0	0.00107752400677658	0.0306072813468252	0.0214966538839877	32		0	0.00365258291144629	0.0253138820567339	0.0256028844750216	41		0	0.00365258291144629	0.0253138820567339	0.0256028844750216	41		0	0.0269880327816603	0.0350914441375232	0.00474866170472612	48
0	0.267999912173302	0.22042586584712	0.0207323864903994	85		0	0.250210760540554	0.093413373824054	0.0785819424709686	91		0	0.250210760540554	0.093413373824054	0.0785819424709686	91		0	-0.0914338027864678	0.0214529692492568	0.00346915625065602	39
0	0.397906869574762	0.285178484914798	0.276652023761627	78		1	0.499432996284066	0.321782549508987	0.104226150680268	82		1	0.499432996284066	0.321782549508987	0.104226150680268	82		0	0.0948263092706882	0.0461120959877577	0.0506173384935861	61
0	0.270878588385366	0.209452215664745	0.121929602880754	73		0	0.0940533597218402	0.0512188791823426	0.00657945664742888	71		0	0.0940533597218402	0.0512188791823426	0.00657945664742888	71		0	0.334812532468397	0.116148133601383	0.0696086682692779	76
0	0.146841276893715	0.0678737469692054	0.0448418440609937	73		0	0.154820424099107	0.0410737089993573	0.0308110583344034	67		0	0.154820424099107	0.0410737089993573	0.0308110583344034	67		1	0.485192939782852	0.235271089194889	0.122859131566311	89
0	0.14497473039709	0.0575553464849766	0.0412799217791928	59		0	-0.0528803490333019	0.0181762867301417	0.00422884350195352	30		0	-0.0528803490333019	0.0181762867301417	0.00422884350195352	30		0	0.163714975172195	0.045562964797631	0.417077168612421	29
0	0.410822762674281	0.287952812942248	0.100890512881603	86		0	0.371760615074154	0.156102289823329	0.297081191918915	85		0	0.371760615074154	0.156102289823329	0.297081191918915	85		0	0.269330341452595	0.139523368721949	0.0242204550291605	80
0	0.366634673095278	0.263924151997129	0.374090295931013	78		1	0.426688083934651	0.27786019542791	0.411219838169737	89		1	0.426688083934651	0.27786019542791	0.411219838169737	89		0	0.0804082421481841	0.0575284462775348	0.0124980974543341	56
0	0.103478175575617	0.0395929172321688	0.058251915668177	37		0	-0.196070350474825	0.0136640712780435	3.04714496844311e-05	48		0	-0.196070350474825	0.0136640712780435	3.04714496844311e-05	48		0	0.0521852098254639	0.0341106236512482	0.0214803082554085	44
0	0.330841496500706	0.292006456973592	0.0117272918630262	96		0	0.1607133183046	0.117585771551712	0.0154727829729279	78		0	0.1607133183046	0.117585771551712	0.0154727829729279	78		0	0.106761494496698	0.0649489228057346	0.0120125344286126	63
0	0.380072865225808	0.208942216048754	0.168499548515987	82		1	0.471045693579788	0.13107714207835	0.0936680200261092	80		1	0.471045693579788	0.13107714207835	0.0936680200261092	80		0	0.00347772556407576	0.0237391549560988	0.019187951989646	36
0	0.165276779250203	0.0918514922997306	0.0366721242899519	64		1	0.458524307847968	0.162193523700202	0.249871482375233	81		1	0.458524307847968	0.162193523700202	0.249871482375233	81		0	0.504857313895986	0.194006957560852	0.609194212222997	94
0	0.177130614468932	0.115811373294045	0.0177554828249256	61		0	0.156682847955765	0.0317058659173409	0.0163186254564646	61		0	0.156682847955765	0.0317058659173409	0.0163186254564646	61		0	-0.113334445977186	0.00747765044924928	0.00912213315721213	36
0	0.0932681916437805	0.0580276883125331	0.0212564159172561	52		0	0.213434059336231	0.100134899002704	0.0196752591979206	80		0	0.213434059336231	0.100134899002704	0.0196752591979206	80		1	0.192999749152327	0.0239678867016922	0.0848856788194923	36
0	0.389089736104394	0.210193668361873	0.380856851545538	73		0	0.0239014514302189	0.0288644385691346	0.0038092747387266	56		0	0.0239014514302189	0.0288644385691346	0.0038092747387266	56		1	0.47482783981651	0.272963375294014	0.0497633858882053	89
0	-0.0435621577991147	0.0248049567986342	0.00715082580138858	42		1	0.29839730637091	0.13875744321874	0.216776892247682	80		1	0.29839730637091	0.13875744321874	0.216776892247682	80		0	0.234200674942571	0.13400191826494	0.0347062430751574	85
0	0.247159300068502	0.136734988126678	0.0866013580402107	53		0	-0.047281611073158	0.00816342533018739	0.00925889157060551	49		0	-0.047281611073158	0.00816342533018739	0.00925889157060551	49		0	0.398993523400885	0.265637211381926	0.198555704747666	81
0	0.217355450019561	0.146088310399516	0.0228951488841282	77		1	0.545680641581992	0.385199086907819	0.271715177849115	89		1	0.545680641581992	0.385199086907819	0.271715177849115	89		0	0.149187240358404	0.0560864418791794	0.0156830724243097	52
0	0.246005168102244	0.134224182639537	0.0247955989173429	70		1	0.552215109910562	0.280718056488544	0.267730857069293	98		1	0.552215109910562	0.280718056488544	0.267730857069293	98		0	-0.262562754125651	0.00392247935876224	0.0128849506083217	19
0	0.411660098792256	0.233741199037221	0.23918008656687	80		0	-0.0306728238557737	0.022005952315948	0.00185613710037947	48		0	-0.0306728238557737	0.022005952315948	0.00185613710037947	48		0	0.374705733944744	0.0776600761351691	0.0299902613816822	63
0	0.490491265761208	0.122007197515235	0.344601241146502	61		1	0.546394470679437	0.135620550964147	0.203004387159901	73		1	0.546394470679437	0.135620550964147	0.203004387159901	73		0	-0.169666201531326	0.00808865248992839	0.0816929812450507	15
0	0.550706211308681	0.52661478647201	0.180351344576343	90		1	0.775441541023867	0.205114270208292	0.946847412505843	85		1	0.775441541023867	0.205114270208292	0.946847412505843	85		0	0.051767233066793	0.0506699808556342	0.0169749544680157	56
0	0.0512735506931585	0.052573376954785	0.00644149100157573	50		1	0.322375424482501	0.216151815092443	0.0639122653477136	81		1	0.322375424482501	0.216151815092443	0.0639122653477136	81		0	0.38590560811104	0.229343670126515	0.233167376997734	91
0	0.299090571250479	0.158244443122894	0.0524675193947131	80		0	-0.0302138035799683	0.0110429058883482	0.006161393129672	46		0	-0.0302138035799683	0.0110429058883482	0.006161393129672	46		0	0.478587806190672	0.121611329189858	0.0122376955361423	76
0	0.328019306384809	0.203029765095115	0.19613795313983	88		0	0.156341194874172	0.052951301384587	0.133095844800359	63		0	0.156341194874172	0.052951301384587	0.133095844800359	63		1	0.291041241371474	0.121878070645618	0.0242381091571989	66
0	0.279676885804841	0.154797904217135	0.0135369495826128	86		0	0.0906589798249409	0.0292349345177623	0.215615447267811	49		0	0.0906589798249409	0.0292349345177623	0.215615447267811	49		0	-0.120015267917189	0.0100901640403414	0.0230818757387038	26
0	0.334615049331046	0.2126408947277	0.25244133159433	88		0	-0.0554805507087961	0.0260879144685481	0.0015293622666031	50		0	-0.0554805507087961	0.0260879144685481	0.0015293622666031	50		0	0.291638051850463	0.233629788560175	0.0200061876165075	91
0	0.249658529134257	0.144482791491082	0.0780202453288001	80		0	-0.00982356848239428	0.0399139040263384	0.00263961021942103	58		0	-0.00982356848239428	0.0399139040263384	0.00263961021942103	58		0	0.0383506594796548	0.0295142306480684	0.0604800626061864	52
0	0.157323357507075	0.102095378778861	0.0022454171953726	60		0	0.244600656286977	0.0438334834234679	0.0230521796283285	74		0	0.244600656286977	0.0438334834234679	0.0230521796283285	74		0	-0.211467388821114	0.00440478106225561	0.0276815280732683	3
0	0.40798586611334	0.162298480124671	0.843473357833446	68		0	0.214481850622762	0.0344290116137559	0.0723129701675883	69		0	0.214481850622762	0.0344290116137559	0.0723129701675883	69		0	-0.0130430377442924	0.0209760486893486	0.0184662775793746	33
0	0.235301248857316	0.0935109667500417	0.402488280842653	64		0	0.0832531498581357	0.0107056492265907	0.00785183715649411	48		0	0.0832531498581357	0.0107056492265907	0.00785183715649411	48		0	0.205444243781027	0.102498701117342	0.0625197109899036	72
0	0.431885660221856	0.30113168268508	0.340280193279317	88		0	0.103082526330083	0.0552235750701853	0.00043902024341442	63		0	0.103082526330083	0.0552235750701853	0.00043902024341442	63		0	0.108579916476767	0.024004459282454	0.110334350329072	33
0	-0.00346239874261379	0.0250382903045209	0.00455893935652948	43		0	0.18515624983125	0.128924867059594	0.019570912416812	65		0	0.18515624983125	0.128924867059594	0.019570912416812	65		0	-0.0418434131833582	0.0168929153014355	0.0172713584344884	28
0	0.0721115825637591	0.0415541343907887	0.00307701080446323	70		0	0.177748011835242	0.0359954902207642	0.0309708001123778	55		0	0.177748011835242	0.0359954902207642	0.0309708001123778	55		0	-0.210700408908292	0.00469060960186041	0.0116511254168726	0
0	0.395675175524214	0.107263311039202	0.236150433816365	71		0	0.181475720231	0.0444725664565246	0.0270371010077923	64		0	0.181475720231	0.0444725664565246	0.0270371010077923	64		0	0.310345644125066	0.157193908007755	0.0626546363673795	77
0	-0.142122485286915	0.00838890725061543	0.00391816526990029	31		0	0.14124199795304	0.0577730045723034	0.0104015963668821	62		0	0.14124199795304	0.0577730045723034	0.0104015963668821	62		0	0.0467643878399603	0.040040271465328	0.074550909037891	44
0	0.327841854790714	0.194529772970536	0.00874309204815396	87		0	-0.0537544544623891	0.027237152810584	0.00536218610854105	47		0	-0.0537544544623891	0.027237152810584	0.00536218610854105	47		0	0.700524000724129	0.474059242896806	0.266276654677959	67
0	0.192821055513256	0.0682176532796212	0.289101892270816	67		1	0.516041946713272	0.0872791394321186	0.630175666929057	70		1	0.516041946713272	0.0872791394321186	0.630175666929057	70		0	0.234726141356668	0.0827714226248622	0.211569528568962	57
0	-0.0395999443792216	0.015814802500152	0.00250562097227036	48		0	-0.0373792232929149	0.0403019578470347	0.000115339183850252	53		0	-0.0373792232929149	0.0403019578470347	0.000115339183850252	53		0	0.280073018356551	0.141881367379105	0.0730281090546021	78
0	0.316466142438592	0.155302929931555	0.0741549601851774	64		0	0.0344575704998281	0.0331604508731232	0.00984354635316405	64		0	0.0344575704998281	0.0331604508731232	0.00984354635316405	64		0	-0.209368884701349	0.00473847659875847	0.011687444035456	0
0	0.219374761344401	0.102776112046939	0.0478008893974387	80		0	0.105541271099599	0.0369487886033157	0.320247001543138	54		0	0.105541271099599	0.0369487886033157	0.320247001543138	54		0	0.337776360068772	0.238838775632084	0.0623611473526811	94
0	0.166053372389678	0.0864171506964289	0.0689488098521437	79		0	0.00409924829045329	0.0579121628962524	0.00214758609905303	52		0	0.00409924829045329	0.0579121628962524	0.00214758609905303	52		0	0.0853349981415573	0.0479901631868187	0.00596342205025099	76
0	0.284399746119644	0.127512440271179	0.0300523885731813	77		0	0.431571915884332	0.113964362658906	0.736019459263947	82		0	0.431571915884332	0.113964362658906	0.736019459263947	82		0	0.230672410737436	0.128271135816979	0.0286833048513909	89
1	0.264365006896686	0.0641341908182501	0.046986898955291	92		0	0.154202651841413	0.0635155148386494	0.055176295789404	64		0	0.154202651841413	0.0635155148386494	0.055176295789404	64		1	0.0562478776580761	0.0352274260410354	0.0112048365722218	61
0	0.191908012223469	0.0788169607993505	0.0183675772916672	70		0	0.10789471941216	0.0317441117482105	0.00320418904023135	69		0	0.10789471941216	0.0317441117482105	0.00320418904023135	69		0	0.125014366401733	0.0766462556853198	0.0118999868043532	73
0	0.197757257685632	0.0570568813023475	0.0183144636771217	78		1	0.582788520862807	0.128533043124551	0.521312141507075	81		1	0.582788520862807	0.128533043124551	0.521312141507075	81		0	0.528553427391569	0.480856848588276	0.153218502460059	95
0	0.153525221414231	0.0622955453441196	0.0334958857463766	65		1	0.271994090727854	0.0445842028868164	0.151926193581321	64		1	0.271994090727854	0.0445842028868164	0.151926193581321	64		0	0.296153508949887	0.223748394870815	0.334592887106637	85
1	0.298361114557554	0.116364543803717	0.161163972791914	90		0	0.211552372639524	0.0837294788910116	0.00228169379888236	86		0	0.211552372639524	0.0837294788910116	0.00228169379888236	86		0	-0.0925851091608703	0.0128215399633503	0.0240493891940665	27
1	0.111395043362943	0.0303256695713097	0.025785984080684	68		1	0.323427950277108	0.112778257032502	0.495571657418176	80		1	0.323427950277108	0.112778257032502	0.495571657418176	80		0	-0.24796462582122	0.00361016922070844	0.000479330033729026	0
0	0.142634392565433	0.0724719462488452	0.0226964246789868	67		0	0.00191536809331934	0.0181853292385888	0.00127570866406976	55		0	0.00191536809331934	0.0181853292385888	0.00127570866406976	55		0	0.152026397814523	0.0549407122139534	0.0780607626150004	55
0	0.22965538820596	0.0753286967676175	0.0529672480287327	75		0	-0.0714118107102377	0.00715164921822709	0.00509870514490087	51		0	-0.0714118107102377	0.00715164921822709	0.00509870514490087	51		0	0.338058215080935	0.0998504468372007	0.0287334743642871	69
1	0.340470529992116	0.296315854080523	0.0676639411573925	90		0	-0.0871732709810534	0.0160675521437994	0.000999482513844834	51		0	-0.0871732709810534	0.0160675521437994	0.000999482513844834	51		0	0.37134170049782	0.0501274609188307	0.0219708114060252	71
0	0.460830737285661	0.188410914539906	0.0388646678484161	89		0	-0.0911420483325186	0.0105731471884369	0.00790066020663997	40		0	-0.0911420483325186	0.0105731471884369	0.00790066020663997	40		0	0.148703241099953	0.0840431182024439	0.0791509468926394	67
0	0.447367829457551	0.252198660564498	0.284222920225706	79		1	0.688608528071914	0.244031368884642	0.715754751627101	71		1	0.688608528071914	0.244031368884642	0.715754751627101	71		0	-0.0888468603695713	0.0152455504804886	0.0687599752160295	37
1	0.209093582953264	0.144972115033216	0.00132540633026086	92		0	-0.0175577350013276	0.0113248807973744	0.000495034513376464	57		0	-0.0175577350013276	0.0113248807973744	0.000495034513376464	57		0	0.333034986282484	0.172525788430187	0.0220663089055761	90
1	0.241146046427161	0.118048164060917	0.0366441200479953	80		1	0.672269550275002	0.234507459331283	0.593705767918632	73		1	0.672269550275002	0.234507459331283	0.593705767918632	73		0	-0.110162111998859	0.01007836145335	0.0147324846915012	17
0	0.0416070093550913	0.0381164440861046	0.0342827122753497	48		1	0.287191209329294	0.195274636002295	0.00277965782053662	90		1	0.287191209329294	0.195274636002295	0.00277965782053662	90		0	0.194393427391512	0.0900371248280986	0.00993263608103222	90
0	0.0476553955582486	0.0378003665848939	0.0564182714032876	50		1	0.612892450810695	0.226675255136224	0.89375085118378	75		1	0.612892450810695	0.226675255136224	0.89375085118378	75		0	-0.179536894942457	0.00917645822618368	0.0109787827849869	33
0	0.363622324515588	0.0957709892905582	0.0871771228688276	86		0	0.213396629779582	0	0.00643223681494917	90		0	0.213396629779582	0	0.00643223681494917	90		0	0.273634575561972	0.180539078254763	0.0185652872434392	91
0	-0.0402911545278413	0.0471981814001108	0.0108685932221896	51		0	0.152163172992054	0.0464377027090722	0.0397528212122206	90		0	0.152163172992054	0.0464377027090722	0.0397528212122206	90		0	0.143380579140941	0.0685613823294396	0.0655509282109328	63
0	-0.0670286147722315	0.0168866861151123	0.00094098689358854	47		0	0.193055377485931	0.0774255310447669	0.0275137537489163	81		0	0.193055377485931	0.0774255310447669	0.0275137537489163	81		0	0.263975120526742	0.0601342940287945	0.414399955181357	62
0	0.344015441815415	0.164355819831468	0.13108152668065	80		0	0.113298199333784	0.0488785088277988	0.00434467614376178	78		0	0.113298199333784	0.0488785088277988	0.00434467614376178	78		0	-0.316163888458208	0.00500786711108706	0.00598234870558668	5
0	0.320827229013102	0.191387947124401	0.0406093535428854	88		0	0.1098787024151	0.0395770476658924	0.0106307179968951	74		0	0.1098787024151	0.0395770476658924	0.0106307179968951	74		0	0.0291054569051167	0.0287411872382613	0.0203624871749237	40
0	0.0391144627436001	0.0173379860474589	0.00180582563754844	62		0	0.0545024388822386	0.0303626127669858	0.0105605844154205	62		0	0.0545024388822386	0.0303626127669858	0.0105605844154205	62		0	0.118342448247387	0.0500693366438091	0.051164508383098	50
1	0.303022038077951	0.139016774793977	0.295285549487678	81		0	0.188470111612332	0.0676284591862047	0.012589907865265	87		0	0.188470111612332	0.0676284591862047	0.012589907865265	87		1	0.759349999822509	0.312754314581085	0.8851063888224	74
0	0.214082908843936	0.0779563721426402	0.107522620768403	66		0	-0.0754119705511816	0.00459549324679607	1.66919062987101e-05	47		0	-0.0754119705511816	0.00459549324679607	1.66919062987101e-05	47		0	0.293896919581762	0.191076218140928	0.174646924791572	80
1	0.544569289000053	0.203462102699544	0.422148463562251	79		0	0.00252546944072613	0.0180777041266536	0.00671475912189835	57		0	0.00252546944072613	0.0180777041266536	0.00671475912189835	57		0	-0.244991100542015	0.00587864776873948	0.00610930988113941	1
1	0.534150249125239	0.303731335431527	0.190343486981329	98		0	0.166440250407468	0.0496157496706289	0.00255830206382582	79		0	0.166440250407468	0.0496157496706289	0.00255830206382582	79		0	0.227313631277375	0.125263850759995	0.0202029682513298	94
0	0.211097186825595	0.0917801501296476	0.020252831884244	94		0	0.191557833816783	0.0735131567388095	0.0111612875275461	85		0	0.191557833816783	0.0735131567388095	0.0111612875275461	85		0	-0.27590987260014	0.00624330431657301	0.0158974531539965	1
0	0.0659331280524497	0.0408144449545416	0.031511931334091	49		0	0.0287993757613205	0.0291631319581588	0.0170630458757176	52		0	0.0287993757613205	0.0291631319581588	0.0170630458757176	52		0	0.318052645287314	0.054080010273224	0.561485105285865	68
0	0.25367670870568	0.13204837819332	0.0952968677167608	73		1	0.55872161554816	0.333184292526467	0.432534036674367	90		1	0.55872161554816	0.333184292526467	0.432534036674367	90		0	0.146078442302381	0.161960806009989	0.0215858219847319	82
1	0.307708270893094	0.16775641279063	0.164049674507823	89		0	0.308087834242102	0.165181860323215	0.00597873307396291	90		0	0.308087834242102	0.165181860323215	0.00597873307396291	90		0	0.387078675182775	0.155660227597621	0.0311665642794462	82
1	0.472293125097059	0.145101623994463	0.0976872623806389	85		0	-0.0325069369322931	0.0102783018844314	0.00187587969651389	60		0	-0.0325069369322931	0.0102783018844314	0.00187587969651389	60		0	0.244962440105568	0.0967821317017111	0.0246327563434958	61
0	0.205240749195648	0.100524528643428	0.0588373056222695	68		1	0.299655559114023	0.190387991450471	0.0242319839944137	85		1	0.299655559114023	0.190387991450471	0.0242319839944137	85		0	-0.101407262732716	0.0114610643045565	0.0438593922812219	20
0	0.324419919168748	0.204150595311124	0.0624473030326972	90		0	0.0214104524579158	0.0378542427979069	0.00730394499770703	60		0	0.0214104524579158	0.0378542427979069	0.00730394499770703	60		0	-0.206623643435182	0.00483870513252452	0.0117626766209178	1
1	0.839696534050472	0.199436604633301	0.681531810459526	67		1	0.456757204316316	0.412756896035129	0.0821241574172452	89		1	0.456757204316316	0.412756896035129	0.0821241574172452	89		0	-0.0704765702024235	0.0255510427755193	0.00443345194648501	57
0	0.017029938968503	0.0306178838340423	0.00166986719490091	51		0	0.0518513241337783	0.0230505672122979	0.0156306120774144	61		0	0.0518513241337783	0.0230505672122979	0.0156306120774144	61		0	-0.160432802857613	0.00722124194352561	0.0180962427194843	19
0	0.164229490687373	0.0721986639708395	0.12516965525132	66		0	0.162292307660316	0.0647412694412867	0.0237763593737505	71		0	0.162292307660316	0.0647412694412867	0.0237763593737505	71		0	0.453684170287226	0.207934646132125	0.0484060507270909	88
0	0.0614792714568288	0.0234955281159174	0.03963693893369	47		0	0.200715627225735	0.0724617540444406	0.00304425577761837	84		0	0.200715627225735	0.0724617540444406	0.00304425577761837	84		0	-0.0451475658450319	0.0164776102495648	0.0171392237252295	28
0	0.139155833702613	0.0388936632519238	0.0689205694652946	65		0	-0.030742266688534	0.00891381396278011	0.00496201049374057	50		0	-0.030742266688534	0.00891381396278011	0.00496201049374057	50		0	0.356276810463705	0.116463824376274	0.233572967666566	89
0	0.152325479472723	0.0523499815481051	0.00463538472918759	68		0	-0.0794061953366629	0.0147514701107297	0.00323734892471561	48		0	-0.0794061953366629	0.0147514701107297	0.00323734892471561	48		0	-0.0559810663969246	0.0287652518371673	0.00554850908496572	47
1	0.230348867527189	0.105328297860449	0.0103062003031395	80		0	-0.110449789412811	0.0156806712272074	0.000141978786038869	52		0	-0.110449789412811	0.0156806712272074	0.000141978786038869	52		0	0.0347162786513893	0.023106607447268	0.0295057600196198	52
1	0.389729067693697	0.201494054491764	0.0452477076998389	90		0	0.0761557759558232	0.0256166038240583	0.0155535603869175	51		0	0.0761557759558232	0.0256166038240583	0.0155535603869175	51		0	-0.156294833695536	0.0132689034673696	0.00761361052940237	29
0	0.287680092589431	0.171839693552521	0.104577250338774	78		0	0.0342345131934231	0.054809808837593	0.00107674116639165	70		0	0.0342345131934231	0.054809808837593	0.00107674116639165	70		0	-0.260591441759846	0.00425283384308113	0.0140381036295319	2
0	0.0361373932988968	0.0230406768950331	0.00531887752271994	48		0	0.179571801932302	0.0856854927051545	0.0183509691108467	65		0	0.179571801932302	0.0856854927051545	0.0183509691108467	65		0	0.24290781578686	0.0235432630741649	0.255701350854609	61
0	-0.0543546959764278	0.0202490950959065	0.0192631559650818	67		0	0.147582824241798	0.0675974915485199	0.00317447681496052	74		0	0.147582824241798	0.0675974915485199	0.00317447681496052	74		0	0.00533528402561366	0.0240712201788174	0.019270805058853	36
0	0.218436733320645	0.0660111222509658	0.0237958663860976	71		1	0.455326900825742	0.113382087970221	0.309305799358217	83		1	0.455326900825742	0.113382087970221	0.309305799358217	83		0	-0.0919576862448274	0.0142894075373092	0.0318132097193946	24
0	0.0130640985601919	0.0212003804763396	0.0233950006934214	43		1	0.540923374413758	0.217527552881948	0.948392731562114	76		1	0.540923374413758	0.217527552881948	0.948392731562114	76		0	0.118307029462839	0.0411717057501938	0.0180278639642303	63
0	-0.172696437709665	0.0066893208512551	0.000335477572891517	18		0	-0.124996723385655	0.0104360693790158	2.93771236306088e-05	43		0	-0.124996723385655	0.0104360693790158	2.93771236306088e-05	43		0	-0.0165280146809831	0.0204347017143218	0.0183174799904246	32
0	0.416105815262806	0.0719716920912109	0.478119005068437	63		0	0.196022788473273	0.0937960666637842	0.0430504117983192	88		0	0.196022788473273	0.0937960666637842	0.0430504117983192	88		0	0.318130810469032	0.160912910711652	0.0256695789635347	89
0	0.153250716415462	0.0373303400034434	0.0548848241168692	57		0	0.135112542797802	0.132479682290381	0.00141529934563171	91		0	0.135112542797802	0.132479682290381	0.00141529934563171	91		0	0.226376896730861	0.0463308950770459	0.0158523028765411	69
1	0.556815134528469	0.277802224767937	0.776249098074964	85		0	-0.0114177325524854	0.0306805375776223	0.0236822120302865	55		0	-0.0114177325524854	0.0306805375776223	0.0236822120302865	55		0	0.30679480924514	0.121882822097868	0.058637016747301	83
0	0.428175033160212	0.125816959616136	0.534422979996087	76		0	0.0273975392480174	0.0502637582159994	0.00162694673670479	61		0	0.0273975392480174	0.0502637582159994	0.00162694673670479	61		1	0.511760598540398	0.340560185049966	0.279143888282324	73
0	0.315767984181441	0.10734562750393	0.236239178952013	69		0	0.197794111433852	0.0938054491486952	0.0329118804752547	82		0	0.197794111433852	0.0938054491486952	0.0329118804752547	82		0	0.14011329280182	0.0991141185084634	0.0130842183660315	74
0	0.173438716441615	0.0660757758318261	0.0173756019041561	72		0	0.170694788056839	0.0926866108212416	0.0503499980751527	78		0	0.170694788056839	0.0926866108212416	0.0503499980751527	78		0	-0.34062139520621	0.00414149990074724	0.00168278512531886	4
1	0.308682410477604	0.207119222032929	0.0213927180591337	85		1	0.269501399463731	0.100975425462979	0.0534488991673744	52		1	0.269501399463731	0.100975425462979	0.0534488991673744	52		0	-0.0220897004202441	0.0318943441335142	0.022649305484124	44
0	0.214600082761539	0.149329022301646	0.002150611960403	78		0	0.173039546943785	0.0121383646273284	0.329081439976015	31		0	0.173039546943785	0.0121383646273284	0.329081439976015	31		0	0.0248149900160778	0.0278376763555421	0.0201610578895802	39
0	0.19013790577263	0.0687239560026314	0.199858348740474	60		1	0.287647183395851	0.176609268824099	0.023569468136732	83		1	0.287647183395851	0.176609268824099	0.023569468136732	83		0	0.579508041933447	0.291276925745635	0.227909846954135	88
0	0.0698358417270722	0.0402244576793138	0.0100975866439605	56		0	-0.00838366150840172	0.0259688071891183	0.000323593790134202	51		0	-0.00838366150840172	0.0259688071891183	0.000323593790134202	51		0	-0.191460769844527	0.0111134968292351	0.00941434846297381	22
1	0.540826591654484	0.0698813840300578	0.77077874875092	66		0	0.182027393403132	0.0737774811550458	0.0121635434651621	80		0	0.182027393403132	0.0737774811550458	0.0121635434651621	80		1	0.728562239746575	0.301626792400688	0.11038899962063	64
0	0.461830357038737	0.189205383505708	0.141038655300374	91		0	-0.0897613808669585	0.0172738988821751	0.00104512729188419	45		0	-0.0897613808669585	0.0172738988821751	0.00104512729188419	45		0	0.0273136527254031	0.0283604489993993	0.0202781268240093	40
1	0.469754595282197	0.143735119983779	0.813335428234446	83		0	0.122496813321939	0.0643287109808256	0.000915436303125753	75		0	0.122496813321939	0.0643287109808256	0.000915436303125753	75		1	0.443400124179423	0.157236532937852	0.0832124953250549	72
0	0.305037267622125	0.218809626776276	0.186942626621649	85		0	0.00955907716267256	0.0143856159455433	0.00150101900715747	64		0	0.00955907716267256	0.0143856159455433	0.00150101900715747	64		0	0.111320755679759	0.0400278491617484	0.0277630310808643	64
0	0.150394251651448	0.0525786260014276	0.162988260852992	63		0	0.399015331939565	0.206620677699628	0.150054627709347	80		0	0.399015331939565	0.206620677699628	0.150054627709347	80		0	-0.0257552837419937	0.0403387153038659	0.00178542271251465	56
0	0.801605304827345	0.252399075327882	0.548928107925618	93		1	0.680428230227285	0.315205195999562	0.365909458274447	87		1	0.680428230227285	0.315205195999562	0.365909458274447	87		0	0.0170395461903482	0.0262700991040297	0.0198009772010759	38
0	0.244162713449456	0.125781600403211	0.0283681506575171	89		0	0.208286030919055	0.111802885191822	0.0257107530479746	80		0	0.208286030919055	0.111802885191822	0.0257107530479746	80		0	0.186955032143394	0.0576631419515203	0.0071124851145889	62
0	0.144815771638548	0.0416374903640871	0.000201852809919003	87		0	0.203338629175146	0.080857118509185	0.0903691494266317	79		0	0.203338629175146	0.080857118509185	0.0903691494266317	79		0	0.288073329746203	0.16107280579571	0.0458157314407813	83
1	0.257001187768122	0.133766831377683	0.0192146632411834	91		0	0.0392240404524761	0.0292193482195624	0.00387600825110459	57		0	0.0392240404524761	0.0292193482195624	0.00387600825110459	57		0	-0.0441784906594705	0.0221154964033522	0.0590054411500939	32
0	0.370619880452923	0.132931039183072	0.280153582854333	94		0	0.257331019990667	0.132050181450336	0.00364172507081561	95		0	0.257331019990667	0.132050181450336	0.00364172507081561	95		0	0.173284981134712	0.13147580774534	0.0383225786981475	49
0	0.228834441575602	0.0508811980686101	0.121072814743544	69		1	0.292490754528081	0.190387991450471	0.0700189729305224	85		1	0.292490754528081	0.190387991450471	0.0700189729305224	85		0	0.330249430513045	0.203558287101748	0.0565140788088771	92
0	0.304107090302161	0.131586524355674	0.450101669818038	83		0	0.224072556592508	0.159916423205644	0.00702574193775024	84		0	0.224072556592508	0.159916423205644	0.00702574193775024	84		0	0.262428625366298	0.138811247702378	0.0505692453850849	82
0	0.34485676982362	0.255656697016217	0.080232672258164	97		0	0.266531868521465	0.131370314144	0.254881427473912	80		0	0.266531868521465	0.131370314144	0.254881427473912	80		0	0.414693584177671	0.288942264130013	0.0552880965206497	90
0	0.364158680749246	0.151401893743364	0.0305264451994759	82		0	0.187725017222773	0.0676656589736462	0.00644360334500747	76		0	0.187725017222773	0.0676656589736462	0.00644360334500747	76		0	0.265828401829031	0.0648364553985344	0.0546753618508535	70
0	0.204957299557949	0.0938668679328716	0.109733132716366	63		0	-0.168783208325058	0.0101921346322691	0.00184616679933196	28		0	-0.168783208325058	0.0101921346322691	0.00184616679933196	28		1	0.391089652093098	0.215990594759062	0.0713497831862872	80
0	0.383649464160991	0.151919813710367	0.176173605633369	63		0	0.0572522540815398	0.0285728279807837	0.00606311558755324	63		0	0.0572522540815398	0.0285728279807837	0.00606311558755324	63		0	0.322547068180548	0.221069240129671	0.0963898288107773	89
0	0.391149644200633	0.137273987003649	0.432681291202606	83		0	0.327855320300081	0.0593142443779305	0.0907727856543	58		0	0.327855320300081	0.0593142443779305	0.0907727856543	58		1	0.418370726836622	0.175326093072003	0.113802614310066	91
1	0.309440100715952	0.15612162537727	0.0911619005897902	93		1	0.301212051966083	0.153619156408651	0.00784199648457949	87		1	0.301212051966083	0.153619156408651	0.00784199648457949	87		0	0.289295330665292	0.188383589169585	0.0643589048306991	77
0	0.181898371348883	0.0751867914412051	0.0320063899659313	87		0	0.0816060903649818	0.0515987243208834	3.99337849666637e-05	74		0	0.0816060903649818	0.0515987243208834	3.99337849666637e-05	74		1	0.270359707066617	0.176505240068904	0.0142728836367615	91
1	0.438010562553271	0.149604266539406	0.0922656447016123	86		1	0.281274421485555	0.186987700347068	0.0359124902042073	86		1	0.281274421485555	0.186987700347068	0.0359124902042073	86		0	0.155643527398461	0.0293585466667764	0.00606423968844684	47
0	0.122227430033157	0.0905140264297421	0.031986567435952	68		0	0.334094393496456	0.159778509735837	0.236727590893149	84		0	0.334094393496456	0.159778509735837	0.236727590893149	84		0	0.0747735544440244	0.0471694304584364	0.00770581439757226	62
0	0.177013853828682	0.0488016083609837	0.0939459013501362	72		1	0.467545663031361	0.351573394803665	0.089721438885403	99		1	0.467545663031361	0.351573394803665	0.089721438885403	99		0	-0.131741858599313	0.0103757447439677	0.00260493240155195	31
1	0.327796332706933	0	0.0734019352231028	71		0	0.0500248339801852	0.0403240847652871	0.00258103137680132	72		0	0.0500248339801852	0.0403240847652871	0.00258103137680132	72		0	-0.00722551733088643	0.0328514492818959	0.0111715521133969	43
0	0.220597442816958	0.168805560771963	5.21617937071462e-07	82		0	0.234597622672618	0.0947712518690696	0.0210550528909598	74		0	0.234597622672618	0.0947712518690696	0.0210550528909598	74		0	-0.00357718901193567	0.0270143199108097	0.0167623504061317	55
0	0.203935468204407	0.0382257168156473	0.0635190193995737	63		1	0.129333076253962	0.053376862944506	0.0496439621254265	68		1	0.129333076253962	0.053376862944506	0.0496439621254265	68		0	0.497723308644007	0.107274932656382	0.780571143376479	79
0	0.336832082943499	0.0476407795901497	0.0299197549074107	74		0	-0.141409443629342	0.0104977408287908	0.00112348026897747	39		0	-0.141409443629342	0.0104977408287908	0.00112348026897747	39		0	-0.051665947484021	0.0167234350093945	0.00448645933543128	41
0	0.299675242627684	0.0982239210759057	0.196653960378227	67		0	0.102802997409185	0.03682775337301	0.081589359947764	48		0	0.102802997409185	0.03682775337301	0.081589359947764	48		0	0.326112525241996	0.22753858443617	0.107775831025107	82
0	-0.0790923921354415	0.0164953911920749	0.00652816436760835	34		0	-0.0430924268376345	0.034830786452986	0.000163920839232865	68		0	-0.0430924268376345	0.034830786452986	0.000163920839232865	68		0	0.0933164580958613	0.0401733576746446	0.0103803092210488	61
0	0.0434384713545667	0.0275007586012543	0.00393179403187165	56		1	0.552965079540232	0.118893669280412	0.722109873494568	92		1	0.552965079540232	0.118893669280412	0.722109873494568	92		0	-0.00246795380734234	0.0252694950344821	0.0310074169516381	44
0	0.257743167605012	0.112483933563967	0.114583948850267	80		0	0.24656410103315	0.0488569681349882	0.00480010933305682	70		0	0.24656410103315	0.0488569681349882	0.00480010933305682	70		0	-0.0780411453276637	0.0128542130828194	0.0158768073701494	22
0	0.162501391908644	0.0817949794360008	0.0134059513618139	83		0	0.249629568805515	0.128375973989859	0.117844132904229	71		0	0.249629568805515	0.128375973989859	0.117844132904229	71		0	0.0140650240333577	0.0250885045965782	0.00686012150795795	51
0	0.241508015153177	0.161235777338785	0.0246656218787615	80		1	0.519957924511064	0.286656617658335	0.697408599611913	75		1	0.519957924511064	0.286656617658335	0.697408599611913	75		0	0.165091086657583	0.0770611360736004	0.01402910776168	83
0	0.434237561938981	0.0900655424363624	0.0963426044113711	73		0	0.00960123438395204	0.0176009046715402	0.0138817693713178	53		0	0.00960123438395204	0.0176009046715402	0.0138817693713178	53		0	0.0265454293820791	0.0405628340432152	0.00571084284177035	60
0	0.213990817125129	0.124479600813344	0.115415445482208	63		0	0.143520630829487	0.0712950854333747	0.00613240543281324	74		0	0.143520630829487	0.0712950854333747	0.00613240543281324	74		0	-0.193407032788488	0.00535156125264291	0.0121316241171834	3
1	0.34575288461293	0.299399693787125	0.00602622576698778	82		0	0.198382183564213	0.0307390751906434	0.00839615415090961	80		0	0.198382183564213	0.0307390751906434	0.00839615415090961	80		0	-0.2092373761377	0.00474323050130964	0.0116910371240354	0
1	0.116691257192478	0.0583177699113583	0.0271458520279638	52		0	0.0682372397463694	0.0605546339997709	0.00394614601275449	67		0	0.0682372397463694	0.0605546339997709	0.00394614601275449	67		0	0.0716115692631094	0.0637983610197101	0.0363932863913245	57
1	0.947221030815782	0.52536246916257	0.854511168658975	81		0	0.21950499678316	0.151403998397989	0.00925547977629427	90		0	0.21950499678316	0.151403998397989	0.00925547977629427	90		0	0.111006148930572	0.0392266211966858	0.0180903343281184	59
1	0.308268427792559	0.137073277473612	0.0564305167600641	55		0	0.238381049935726	0.163545001044191	0.0181200335182842	95		0	0.238381049935726	0.163545001044191	0.0181200335182842	95		1	0.273835616433624	0.0821774516940128	0.024081376839993	86
0	0.228540826915132	0.128529107840542	0.0615621200018274	79		0	0.277546744172146	0.119267287346251	0.379992769125438	55		0	0.277546744172146	0.119267287346251	0.379992769125438	55		0	0.15951869096449	0.130040909512706	0.0109442540530894	86
0	0.128108271753692	0.0612842059046637	0.0250894100665753	61		1	0.540205753266368	0.212077150334088	0.88381367193808	72		1	0.540205753266368	0.212077150334088	0.88381367193808	72		0	0.207817412334537	0.0876671500445037	0.0316072734590365	86
0	0.250125845155123	0.136064099569656	0.00968101912626082	90		0	0.504551328464424	0.342875879638266	0.368257644048273	88		0	0.504551328464424	0.342875879638266	0.368257644048273	88		0	0.223391838145571	0.0689768692071575	0.0476191996509993	75
0	0.238926587644973	0.0571247014761948	0.0422169328164929	61		0	0.000774585035482557	0.0146492514529612	0.015945275729541	45		0	0.000774585035482557	0.0146492514529612	0.015945275729541	45		0	0.168400194729855	0.0997571584271136	0.0178909163066962	71
0	0.368567696688448	0.354010190792712	0.031183989361425	105		0	0.120574494494727	0.0424427944572788	0.00119023220832656	77		0	0.120574494494727	0.0424427944572788	0.00119023220832656	77		1	0.336694793357978	0.206457590401944	0.241962223593113	85
0	0.51566552215976	0.171024171172046	0.499442521043528	97		1	0.215241943369335	0.171875756539701	0.0672715360774095	78		1	0.215241943369335	0.171875756539701	0.0672715360774095	78		0	0.5688741337211	0.215904164496349	0.608552650505258	86
0	0.0592107846299712	0.0387345231509083	0.0197909730073082	57		0	0.0717113386413566	0.0350133632204876	0.00255698059415883	67		0	0.0717113386413566	0.0350133632204876	0.00255698059415883	67		0	-0.011267672135035	0.0212572002716721	0.0185425354698207	33
0	-0.143797186339881	0.00238962649338785	0.00348050981407107	35		0	0.0579007235556703	0.0488550426179001	0.00532532534191791	67		0	0.0579007235556703	0.0488550426179001	0.00532532534191791	67		1	0.486311241504497	0.115325117276468	0.741205336631201	88
0	0.135738832332002	0.0671660973880926	0.0144368545717941	54		0	0.330675340570122	0.184867986190197	0.582860962769112	71		0	0.330675340570122	0.184867986190197	0.582860962769112	71		0	0.0873911539248951	0.0582276625378893	0.0099752241589417	65
0	0.34096728808119	0.141833342889039	0.163067811140723	77		0	0.132185350657242	0.0582476791900487	0.0155397859111119	75		0	0.132185350657242	0.0582476791900487	0.0155397859111119	75		0	0.0552827919278636	0.0169173367473214	0.0322608666494511	56
1	0.543129091673461	0.599645425066131	7.66468756741442e-08	99		1	0.423731415525689	0.231339635435871	0.36117962132313	67		1	0.423731415525689	0.231339635435871	0.36117962132313	67		0	-0.010530692196807	0.0238313412320535	0.00689296589815037	57
0	0.215138224674661	0.0610533561265067	0.123849049062082	79		1	0.484764401965485	0.195366581002359	0.308842366239632	87		1	0.484764401965485	0.195366581002359	0.308842366239632	87		1	0.387225840025132	0.238088342835067	0.0758960626708866	90
0	0.598513552670466	0.110512469340639	0.436039982168536	69		0	0.076611931667231	0.0319165668919042	0.00146407729624595	68		0	0.076611931667231	0.0319165668919042	0.00146407729624595	68		1	0.338700162597175	0.0797699048970575	0.0870422558298545	63
0	0.0186853129978723	0.0347906832037187	0.000871506875635512	53		0	0.238178256996387	0.142932640750588	0.0162464351082218	89		0	0.238178256996387	0.142932640750588	0.0162464351082218	89		0	0.133586479331811	0.0870691208056349	0.0184826404292448	69
0	0.656845306206989	0.147682953129386	0.213619871154199	78		0	0.141102979734237	0.0666406126904819	0.211691928506396	60		0	0.141102979734237	0.0666406126904819	0.211691928506396	60		0	0.282302164565407	0.175411281821358	0.0387187882962883	90
1	0.610599264379462	0.419497347366582	0.377073164611741	85		0	0.0494344506085661	0.0366815205274736	0.0189703599130295	48		0	0.0494344506085661	0.0366815205274736	0.0189703599130295	48		0	0.307883719200496	0.089094593779188	0.00881129743947909	76
1	0.636946132412323	0.315507181249772	0.135594901199319	98		0	0.678999469469302	0.231943565942389	0.990366784122042	60		0	0.678999469469302	0.231943565942389	0.990366784122042	60		0	-0.345753685440498	0.00304434757148427	0.00139644499950483	0
0	-0.0453171483621938	0.0177034461500733	0.00565716078972841	51		0	0.394079328354138	0.321976438964621	0.0357979956355126	86		0	0.394079328354138	0.321976438964621	0.0357979956355126	86		1	0.179468304999228	0.0635842020483686	0.0121065795188675	65
0	-0.0677744569199541	0.0130603588827711	0.00381390715467839	39		0	0.222668735249185	0.0749693754093827	0.0383696288210859	78		0	0.222668735249185	0.0749693754093827	0.0383696288210859	78		0	0.437126108150043	0.209636288445996	0.218916901311356	88
0	-0.0363430384453876	0.0268625888788202	0.00945539034614356	34		0	0.271666230619891	0.141459317421924	0.104835512062212	77		0	0.271666230619891	0.141459317421924	0.104835512062212	77		0	0.324453810578765	0.17791230448465	0.0350176208972698	85
0	0.184398929812988	0.103438178052721	0.022926556360795	77		1	0.400471604932728	0.213963392437396	0.324906664762819	86		1	0.400471604932728	0.213963392437396	0.324906664762819	86		0	0.329720723347721	0.16617124214615	0.0532972424335601	81
0	0.310463459236364	0.108763637836431	0.310005934191908	66.679109811566		0	-0.0679139918882696	0.0255944484740872	0.00115422078908659	48		0	-0.0679139918882696	0.0255944484740872	0.00115422078908659	48		0	0.196516451638859	0.0972574070898173	0.0245983707178404	45
0	0.0692811399797548	0.0442826595528059	0.00946935587017142	74		0	0.00822525438789841	0.0192501318849501	0.00218185215042788	56		0	0.00822525438789841	0.0192501318849501	0.00218185215042788	56		1	0.447372135538032	0.1333008453298	0.332128531290038	62
0	0.305820207587126	0.148550053372115	0.0512004127346381	76		1	0.395441232911618	0.223445426115312	0.00960641883898854	64		1	0.395441232911618	0.223445426115312	0.00960641883898854	64		0	0.242657130936883	0.0881960275804269	0.226003216174414	58
0	0.285732024599466	0.104546974563093	0.688961369411943	62		0	0.58630763802747	0.100347001425384	0.99012953763915	63		0	0.58630763802747	0.100347001425384	0.99012953763915	63		0	0.365695181409699	0.176703667276921	0.244291185341323	66
0	0.333468929546404	0.166611038206842	0.158679409208528	70		0	0.361500568890441	0.0198360251270682	0.967644166168437	54		0	0.361500568890441	0.0198360251270682	0.967644166168437	54		0	0.175591173393813	0.0370826621684722	0.0160630984554126	76
0	-0.0964526483723405	0.0107675470436136	0.0125288794381927	44		0	0.0599821022711818	0.0280534386887555	0.0147229417616283	51		0	0.0599821022711818	0.0280534386887555	0.0147229417616283	51		1	0.488704376894288	0.226869727728084	0.538033854674483	81
0	0.13372976668551	0.0856854927051545	0.0187048024837036	65		0	0.228566823699219	0.109203691850544	0.139229422207609	60		0	0.228566823699219	0.109203691850544	0.139229422207609	60		0	0.220338492246658	0.100394409847875	0.0118544591061135	94
0	0.641888382735482	0.141291112292154	0.996652812657153	61		0	0.0396321128230941	0.0405878984588808	0.00150578212151322	61		0	0.0396321128230941	0.0405878984588808	0.00150578212151322	61		0	-0.344524892658447	0.00448588590924595	0.00272894874509635	2
0	0.0742090079137697	0.0180037183105612	0.557091447286284	32		0	0.274679174065991	0.0734660226456866	0.164006903544589	70		0	0.274679174065991	0.0734660226456866	0.164006903544589	70		0	-0.0428569496573116	0.0136222944547217	0.0362011607160146	23
0	-0.0328383932477133	0.0197622001346519	0.0123409942378105	38		0	0.254000533395822	0.0611641117516799	0.00107940005181791	71		0	0.254000533395822	0.0611641117516799	0.00107940005181791	71		0	-0.372790191314474	0.00336657703909105	0.00189675010415229	0
0	0.0251356523652312	0.0221395340782681	0.00732217379009235	53		0	0.0821648774507619	0.0233654920033018	0.0375523788721189	60		0	0.0821648774507619	0.0233654920033018	0.0375523788721189	60		1	0.81230285976631	0.266006566008363	0.951446118148119	77
0	0.365100455703506	0.123040282695319	0.677592998492553	62		0	0.145993205603213	0.0703695018792887	0.0128463634425475	66		0	0.145993205603213	0.0703695018792887	0.0128463634425475	66		0	0.488820135928169	0.286391523624165	0.0311489110958765	91
0	0.10071534456382	0.048002902680964	0.140870708398172	40		0	0.109542756615293	0.06723178214082	0.0100558107379946	68		0	0.109542756615293	0.06723178214082	0.0100558107379946	68		0	0.178278110106565	0.0504550331184853	0.171428425562583	30
0	0.21348652146028	0.0850666634135407	0.112732284224128	64		0	0.113989834986524	0.0359378571490758	0.00133734074888534	72		0	0.113989834986524	0.0359378571490758	0.00133734074888534	72		0	0.505655387583231	0.223265404718642	0.00622208870135661	46
0	0.090830202525623	0.0254949584758131	0.169844472268843	47		0	0.250972651013413	0.0838942160576315	0.0100561392481225	80		0	0.250972651013413	0.0838942160576315	0.0100561392481225	80		0	0.00183181256303131	0.0373758505618243	0.00693358103447479	55
0	-0.0533177686091582	0.0163163929638798	0.00263165844495119	36		0	0.174743377832515	0.0923070193062034	0.00593246748068297	84		0	0.174743377832515	0.0923070193062034	0.00593246748068297	84		0	0.094634700190362	0.0365452650737688	0.0146750320827136	55
0	0.188666363896627	0.0842388707770464	0.11866191371825	63		0	0.186801970929001	0.0699493340755015	0.0116052920259742	70		0	0.186801970929001	0.0699493340755015	0.0116052920259742	70		0	0.324852702390519	0.234629751675152	0.0791263779175755	82
0	0.190542069417946	0.0747744429891111	0.226463527366518	52		0	0.145430618520582	0.0576283881349279	0.0514581079253922	65		0	0.145430618520582	0.0576283881349279	0.0514581079253922	65		0	0.265402518432654	0.137358037981435	0.0169809701159451	83
0	0.12246295855239	0.0310601590175366	0.342380024498822	49		1	0.331671107135274	0.165764402902914	0.0191980674215567	86		1	0.331671107135274	0.165764402902914	0.0191980674215567	86		0	0.125274659311326	0.0847753620332234	0.0179983646351158	68
0	0.150048111215293	0.0431625199268813	0.0216850214275258	65		0	0.174904742023837	0.0853308420902517	0.0588287783781475	71		0	0.174904742023837	0.0853308420902517	0.0588287783781475	71		0	0.306810992013375	0.229903093582847	0.0130529460615989	91
0	0.0236868827619742	0.0254915122269706	0.0204085449929095	54		1	0.245617868382249	0.134529348986454	0.0213870323533137	76		1	0.245617868382249	0.134529348986454	0.0213870323533137	76		0	0.10502168641263	0.0684886635532289	0.00735449541608724	69
0	0.326945619361913	0.153251070358563	0.0368312485982977	92		1	0.221601116945905	0.114508775916956	0.044080699742727	72		1	0.221601116945905	0.114508775916956	0.044080699742727	72		0	0.297458571539917	0.149637676551371	0.0203179749624019	92
0	0.235497543547412	0.144798755107625	0.0583239273468203	84		0	0.0471191861561268	0.0301341755012035	0.00530500247320367	58		0	0.0471191861561268	0.0301341755012035	0.00530500247320367	58		0	0.176975345871124	0.0216021967242989	0.181156268637515	40
0	0.187148319049682	0.0551782826820325	0.00145910930923148	63		0	0.190666002951157	0.0473178988727331	0.051168995333521	77		0	0.190666002951157	0.0473178988727331	0.051168995333521	77		0	-0.207757904796652	0.00479704008471799	0.0117315346619259	0
0	0.264548905429472	0.111118247738463	0.0136471974531969	74		0	0.11024554988852	0.0291788060976379	0.00281269950367912	64		0	0.11024554988852	0.0291788060976379	0.00281269950367912	64		0	0.0862325890501241	0.0136114487096945	0.00776554258175021	27
0	-0.0724636588438105	0.0169524061338349	0.000688473570622833	52		0	0.294625231611975	0.248330088928776	0.052349473234479	88		0	0.294625231611975	0.248330088928776	0.052349473234479	88		0	-0.0555860580846477	0.0152304563201808	0.0167282757790552	26
0	0.213521799050065	0.0725817782511889	0.0162274268916023	77		0	0.279432039915085	0.0875369061957872	0.139174073208681	79		0	0.279432039915085	0.0875369061957872	0.139174073208681	79		0	0.0141586734385641	0.030976504248788	0.0234709912763078	42
0	0.00619895987387057	0.0351547320599912	0.0129125374317043	56		0	-0.1323594857387	0.0161529625011973	0.000298367583817759	45		0	-0.1323594857387	0.0161529625011973	0.000298367583817759	45		0	-0.209960673237768	0.00471714265115334	0.0116712886362037	0
0	0.0577447626910194	0.0128683321899439	0.00673332625741207	47		0	0.355009896371659	0.0304071620490543	0.0683830443904364	61		0	0.355009896371659	0.0304071620490543	0.0683830443904364	61		0	0.402423703580124	0.0573087890193136	0.351582600600193	64
0	0.233144906511058	0.0991737590929539	0.0867632575496485	65		0	0.281060173308859	0.124079830643235	0.0314448893021515	76		0	0.281060173308859	0.124079830643235	0.0314448893021515	76		1	0.266051920192333	0.185166074966958	0.26080189073398	80
0	0.240349720713383	0.101021035624086	0.0775948912582726	58		0	0.179643100883362	0.0492559740049078	0.0483477537984477	60		0	0.179643100883362	0.0492559740049078	0.0483477537984477	60		0	-0.275539791654707	0.00471950836109865	0.00158406840397134	0
0	0.266415162655956	0.113413626329449	0.253670139185326	47		0	-0.164530543208498	0.0115770996623443	0.000113595961508086	48		0	-0.164530543208498	0.0115770996623443	0.000113595961508086	48		0	-0.0536463067708293	0.0154549629396264	0.0168039012350609	26
0	-0.0237697740894928	0.0134794495072729	0.0970807238882252	30		0	0.229959192298057	0.0742073341769641	0.0157110236973451	69		0	0.229959192298057	0.0742073341769641	0.0157110236973451	69		0	-0.00558088510411536	0.034311488424538	0.00320142499200564	56
0	-0.0139035338409725	0.0151250593436828	0.00462684762471725	48		0	0.136875740152052	0.0672591952317575	0.0171683728610261	72		0	0.136875740152052	0.0672591952317575	0.0171683728610261	72		0	0.157109006965773	0.145233115366936	0.0114365697806945	81
0	0.0501260641586807	0.0232966287820563	0.12291262100999	46		0	0.117735869279915	0.0536058558402302	0.0262559740325692	66		0	0.117735869279915	0.0536058558402302	0.0262559740325692	66		0	0.225735278718096	0.0745387624107824	0.108389921151475	81
0	0.169393668638623	0.0954202573175001	0.0213885506345197	73		0	-0.0431210207091724	0.0213243703026298	0.000801786636323793	51		0	-0.0431210207091724	0.0213243703026298	0.000801786636323793	51		0	0.0914268984911049	0.0459180997499288	0.0445479267838377	45
0	-0.0648457654634368	0.00909411150190552	0.0194466751645881	48		0	0.0796557850181804	0.0490579739306104	0.00150983351196772	68		0	0.0796557850181804	0.0490579739306104	0.00150983351196772	68		0	0.230780099108568	0.102436138409996	0.0144852185391115	83
0	0.189254811226441	0.0780239066187403	0.0593010072475843	61		1	0.745909627422743	0.193709139740321	0.999436621362665	66		1	0.745909627422743	0.193709139740321	0.999436621362665	66		0	0.0183684835715672	0.0201471127286558	0.07535647815721	31
0	-0.0799316001897543	0.017944060038945	0.0159739987263379	34		0	0.162412990778099	0.0534209588619199	0.00305064807436336	65		0	0.162412990778099	0.0534209588619199	0.00305064807436336	65		0	-0.127460005496895	0.0141974570999186	0.0125573150121117	24
0	0.30679214618164	0.139688558186	0.0140248289609081	76		0	0.180796428229761	0.08845232077341	0.0251970133308233	88		0	0.180796428229761	0.08845232077341	0.0251970133308233	88		0	0.0626776578243363	0.0241304628373741	0.0809608463133806	36
0	0.106021633195375	0.0567511200473401	0.0298730003364138	67		0	0.284444581925047	0.114404409241993	0.077993130868996	84		0	0.284444581925047	0.114404409241993	0.077993130868996	84		0	0.323794819905941	0.211508773980269	0.09372464865219	64
0	0.393820900114386	0.0805497570854148	0.895994368701751	58		0	0.0683715892747597	0.0246440982450182	0.00228859740263856	62		0	0.0683715892747597	0.0246440982450182	0.00228859740263856	62		0	0.0685613901102778	0.0206577310073202	0.170115848418026	33
0	0.162155683359386	0.0585247887861829	0.0639448840619408	66		0	-0.00914836510030366	0.0582713195986609	0.0017029089205179	66		0	-0.00914836510030366	0.0582713195986609	0.0017029089205179	66		0	0.469968610185483	0.15775453497952	0.863639935489318	70
0	0.333318257161752	0.100801117476293	0.442010892350128	65		0	0.379929674639426	0.197689686447591	0.0866744823988543	81		0	0.379929674639426	0.197689686447591	0.0866744823988543	81		0	-0.378352428212668	0.00237616158169809	0.00144738473707758	0
0	0.306856452918205	0.115823217009606	0.142571173836527	79		0	0.144227453600681	0.0543032822353006	0.000193231005245109	74		0	0.144227453600681	0.0543032822353006	0.000193231005245109	74		0	0.314148739213144	0.219735878302329	0.069842217272495	90
0	0.18751913869746	0.0722445466432522	0.02239611805119	72		1	0.549045235462959	0.277015799327994	0.836953409806106	80		1	0.549045235462959	0.277015799327994	0.836953409806106	80		0	0.279317614233185	0.137634054643164	0.0240098983023207	86
0	0.183851280970921	0.103316573814009	0.127774063472269	63		0	0.217598817763721	0.130893617405852	0.0535356297819322	88		0	0.217598817763721	0.130893617405852	0.0535356297819322	88		0	0.131529083974745	0.0537184490116219	0.0276772702178864	64
0	0.110201701518508	0.0393277423795858	0.0740695287674206	43		0	0.153761168879569	0.0576184018895931	0.0353837760050996	74		0	0.153761168879569	0.0576184018895931	0.0353837760050996	74		0	0.404500560868005	0.270706921868486	0.0593365571583698	95
0	0.0968304303748573	0.0191531195042485	0.0168282646683537	72		0	0.157861487765519	0.0460035681143823	0.132101418493834	51		0	0.157861487765519	0.0460035681143823	0.132101418493834	51		0	0.252690455276634	0.133028990581399	0.0528845304236915	78
0	0.100193934796036	0.0579488308210784	0.0113746199862384	68		0	0.314823755909456	0.135324008417944	0.172113928617069	72		0	0.314823755909456	0.135324008417944	0.172113928617069	72		0	0.353988560847755	0.208185597132506	0.17656488968473	85
0	0.305578568001503	0.149606030076024	0.135213351288923	83		0	0.0368019787298569	0.0397841137172606	0.000538920775119275	65		0	0.0368019787298569	0.0397841137172606	0.000538920775119275	65		0	0.246980769423792	0.171290281136572	0.0447079971443731	90
0	0.0452207462840119	0.0394030773932379	0.0283243852250361	58		0	-0.0628764629675543	0.0373485760847662	0.000503172142135926	60		0	-0.0628764629675543	0.0373485760847662	0.000503172142135926	60		0	0.211599448821803	0.122335801072451	0.00950859978487531	84
0	0.60565470112562	0.287595965140547	0.859852830549487	76		0	0.251482669611074	0.0974324465666883	0.035314996714821	82		0	0.251482669611074	0.0974324465666883	0.035314996714821	82		0	-0.226108677058463	0.00469060960186041	0.00801805944093726	0
0	0.104084621643488	0.0404901526918035	0.130787709614282	57		0	0.208575485732399	0.0950258790935981	0.049199354226081	79		0	0.208575485732399	0.0950258790935981	0.049199354226081	79		0	0.0269026884640008	0.0282738164473306	0.0202588264250402	40
0	0.288349184855557	0.179927932528175	0.230209981888341	63		0	0.167195388244827	0.0693000647641207	0.02980523075003	60		0	0.167195388244827	0.0693000647641207	0.02980523075003	60		0	0.289034982193898	0.0912011030981618	0.0367357006434963	90
0	0.199557775056149	0.0856854927051545	0.00592093165907604	65		0	0.253187752261113	0.110075871591991	0.0536302072458409	70		0	0.253187752261113	0.110075871591991	0.0536302072458409	70		0	0.326576708082381	0.175527995184118	0.01848375066011	61
0	0.223816886854726	0.0807112964349822	0.0449879656955629	65		0	0.108739502839884	0.0430073807339947	0.00146525316225084	71		0	0.108739502839884	0.0430073807339947	0.00146525316225084	71		0	-0.331020215587299	0.00361743913931354	0.00170685011491043	2
1	0.401738971206946	0.240981982985192	0.105241991876176	80		1	0.464739306919711	0.254142795626378	0.368482620022676	76		1	0.464739306919711	0.254142795626378	0.368482620022676	76		0	0.156759269456758	0.158016610479353	0.0109257549405989	81
0	0.212634642405025	0.0980772175565643	0.00629819603590913	79		0	0.417880720159045	0.114013139672124	0.586285095747879	76		0	0.417880720159045	0.114013139672124	0.586285095747879	76		0	0.0198585755189094	0.0501667405443234	0.018285057405828	44
0	0.023697861784427	0.0457158383693138	0.0427066627858465	49		1	0.825691179425031	0.446406127219895	0.892013896746081	76		1	0.825691179425031	0.446406127219895	0.892013896746081	76		0	-0.278268682711744	0.00517479634968003	0.0130387281284865	3
0	0.284245894002658	0.139552371785421	0.132916759657039	83		0	0.109261847908248	0.0486706344158442	0.00522071295370899	68		0	0.109261847908248	0.0486706344158442	0.00522071295370899	68		1	0.26113138775688	0.0646861645174339	0.0483454418025354	69
0	0.293833623412747	0.0842426552526078	0.69349417564689	57		0	0.153418744587639	0.0741606152773053	0.0153768640915812	85		0	0.153418744587639	0.0741606152773053	0.0153768640915812	85		0	0.415827588199121	0.0983787123426658	0.699083558066858	43
0	0.206961840033361	0.0890320665395677	0.00844150847945319	84		0	0.126345051952475	0.0704459160567413	0.00837867999666069	64		0	0.126345051952475	0.0704459160567413	0.00837867999666069	64		0	0.246549232381916	0.112201171629803	0.00905080179590491	93
0	0.349124709372096	0.101322751981803	0.796682767157184	54		0	0.238758721800284	0.127853332334067	0.0587309088749182	81		0	0.238758721800284	0.127853332334067	0.0587309088749182	81		0	0.38534316554004	0.183868323607523	0.36464685622723	80
0	0.231209052009111	0.0499551352782385	0.743815109566817	56		0	0.227774680596844	0.0893872966438494	0.00617578813941108	90		0	0.227774680596844	0.0893872966438494	0.00617578813941108	90		0	-0.0324582187159218	0.0113336981928602	0.0758240466630985	38
1	0.381270558493769	0.192270629330183	0.295614840267374	90		0	0.190983282829307	0.0863394653011927	0.0201323622456375	63		0	0.190983282829307	0.0863394653011927	0.0201323622456375	63		0	-0.0353147266782135	0.0244354077862871	0.00298179621223837	51
0	0.185019887085687	0.0873068925922646	0.0136738083847151	79		0	0.0390052409330192	0.049975837353911	0.0124537075542755	65		0	0.0390052409330192	0.049975837353911	0.0124537075542755	65		0	0.429981224912582	0.157409099280147	0.290500992031062	85
0	-0.0529214793290461	0.0185808915488443	0.00789041438536127	33		0	0.216807507297783	0.065367501982389	0.0670056677639658	79		0	0.216807507297783	0.065367501982389	0.0670056677639658	79		0	0.294658101843259	0.165007303899506	0.0649957411508617	80
0	0.129809315992791	0.0828320081628482	0.00811405875012789	62		1	0.323274272542744	0.1336020393106	0.476761026142331	74		1	0.323274272542744	0.1336020393106	0.476761026142331	74		0	0.267873100244166	0.0923206483928083	0.0244054402415245	70
0	0.056823505937143	0.0264278348746458	0.0925267819463939	45		0	0.41072540356076	0.117901970801425	0.372094069206888	79		0	0.41072540356076	0.117901970801425	0.372094069206888	79		0	0.202781120238696	0.074795884239996	0.0339897239212907	62
0	0.0755565527994775	0.0498776252894901	0.0249115431192778	55		0	-0.00994930325772241	0.0278388003188272	0.00348552871702569	48		0	-0.00994930325772241	0.0278388003188272	0.00348552871702569	48		0	-0.0490177897075724	0.0148480338688994	0.0215986226503359	25
0	0.0946783045567089	0.0317378583063903	0.0467483968763421	58		0	0.273118429159037	0.0589833755215876	0.00405628283708021	83		0	0.273118429159037	0.0589833755215876	0.00405628283708021	83		0	-0.119170448608795	0.00941258180715121	0.0144264112437948	15
0	0.368781185014446	0.132550909103176	0.562782410427216	74		0	0.226521683429498	0.128892823323037	0.0127491077301888	81		0	0.226521683429498	0.128892823323037	0.0127491077301888	81		0	0.00796545529858781	0.0245491609418628	0.0193887193074345	36
0	0.0332442996020366	0.0367295720583036	0.0584610544103381	46		0	0.106892258344571	0.0719176868930523	0.00260552823942003	72		0	0.106892258344571	0.0719176868930523	0.00260552823942003	72		0	0.378638024060684	0.262225067099786	0.0974159061919884	94
0	0.211657131855256	0.08556264207111	0.108157512791579	74		0	0.0986222195702934	0.0787489627316976	0.0119316078584597	64		0	0.0986222195702934	0.0787489627316976	0.0119316078584597	64		0	-0.390097722668686	0.00289037357453434	0.000920963755858715	1
0	0.0269035616600784	0.031145416460583	0.00409146666110163	71		0	0.263798922460373	0.0832551272321306	0.0180256062359507	87		0	0.263798922460373	0.0832551272321306	0.0180256062359507	87		0	0.289985611841626	0.0512013963432726	0.662392010396627	49
0	0.343648149137268	0.169222324926552	0.164622476322234	79		0	0.148288127580668	0.0607254315188632	0.00244741621744795	78		0	0.148288127580668	0.0607254315188632	0.00244741621744795	78		0	0.246444561829457	0.102489953028052	0.017621159454823	90
0	-0.0491760200002785	0.0114354279755667	0.0874430383015479	30		0	0.0594880447505809	0.0360028206840998	0.0304705130988801	45		0	0.0594880447505809	0.0360028206840998	0.0304705130988801	45		0	0.376998204793167	0.223548359457172	0.239404470271678	78
0	0.208515692868621	0.0480618182930617	0.651131164912817	48		0	0.406662036544165	0.221130184741951	0.356741573113045	72		0	0.406662036544165	0.221130184741951	0.356741573113045	72		0	0.207518343418753	0.0344089990330418	0.0704422802142059	62
0	0.195834919772849	0.0893824260061937	0.211755683097307	53		0	0.122408571298396	0.0339215578569222	0.0129231972638058	69		0	0.122408571298396	0.0339215578569222	0.0129231972638058	69		0	0.328702385698573	0.116022341920492	0.183918934716892	79
0	0.194445696553896	0.0908571837837418	0.0673229433301661	62		0	0.415495314801521	0.175975762197576	0.8650040117264	77		0	0.415495314801521	0.175975762197576	0.8650040117264	77		1	0.300963011902182	0.175611514471869	0.0319679723401058	86
0	0.382230615166999	0.228624472021467	0.131643833394632	95		0	0.0142151656632526	0.0234272216695963	0.00295111446761273	61		0	0.0142151656632526	0.0234272216695963	0.00295111446761273	61		0	0.31112632719324	0.0959769387756449	0.0253316734337118	82
0	0.113320299759286	0.0670865854161319	0.00347234090450704	62		0	0.0420405820712026	0.0300676061721031	0.0013203503782228	64		0	0.0420405820712026	0.0300676061721031	0.0013203503782228	64		0	-0.0394120550325427	0.0165332388948778	0.044409184393656	23
0	0.40994918833728	0.215746899421524	0.30687394202953	91		0	0.180469284715971	0.0751666958722178	0.0640436525111411	78		0	0.180469284715971	0.0751666958722178	0.0640436525111411	78		0	0.282405387330434	0.150706043259696	0.0254057425886622	84
0	0.458895855015544	0.138978399667505	0.901417528437074	74		0	0.376071356811677	0.136064099569656	0.0713066007974792	90		0	0.376071356811677	0.136064099569656	0.0713066007974792	90		0	0.254233050614886	0.23110925700598	0.0215988364724495	89
0	-0.00559462105438986	0.0269248525930396	0.00560902299175406	46		0	0.327159754430514	0.14007602539718	0.0199942850746682	89		0	0.327159754430514	0.14007602539718	0.0199942850746682	89		0	0.289257655605673	0.0997260434474528	0.362377708455395	64
0	-0.247550381582781	0.00310761093849357	0.000514766676158707	18		0	0.334975920670951	0.173119653064336	0.190761316079293	76		0	0.334975920670951	0.173119653064336	0.190761316079293	76		1	0.220864049815929	0.128565974603861	0.0671164419665563	75
0	0.120521908199871	0.0506901965015489	0.0314420265540665	59		1	0.386894550338548	0.232105739209828	0.309789002271325	72		1	0.386894550338548	0.232105739209828	0.309789002271325	72		0	-0.0848359812382764	0.0149637644703037	0.0079833925625207	29
0	0.156647956169995	0.0840383454138298	0.0153430921031804	73		0	0.0813012987729523	0.0327339391080963	0.00350520148248307	61		0	0.0813012987729523	0.0327339391080963	0.00350520148248307	61		0	0.39964624399838	0.0626692442801219	0.895929773899689	68
0	0.019673415013642	0.0288676734345754	0.00603268633001489	53		0	-0.0127605414165532	0.0855870474660464	0.000222724791754237	72		0	-0.0127605414165532	0.0855870474660464	0.000222724791754237	72		0	0.241279537236087	0.0673469376455484	0.064564667619174	79
0	0.33751002611787	0.125806070614718	0.419962358300399	89		0	0.235773229755639	0.106668666283098	0.0913364529606704	78		0	0.235773229755639	0.106668666283098	0.0913364529606704	78		0	0.208034390759283	0.133666550801516	0.0267145373824216	76
0	0.215542531071497	0.122638337188228	0.0547016914551894	69		0	0.339703867687089	0.196297198347202	0.0722761553873735	86		0	0.339703867687089	0.196297198347202	0.0722761553873735	86		0	0.0864946729776388	0.0378142284366659	0.0216076425916104	62
0	0.194533146947336	0.0685817153299483	0.0156020193349922	73		0	0.204112877997756	0.0551527596285009	0.00809324039215884	79		0	0.204112877997756	0.0551527596285009	0.00809324039215884	79		0	0.086687657478203	0.050950105006549	0.0375514866880814	57
0	0.377681145737512	0.113554224054501	0.633321112990194	81		0	0.00988864090331672	0.045947516354891	0.0027326285730123	65		0	0.00988864090331672	0.045947516354891	0.0027326285730123	65		0	0.0379494078104919	0.0306942291254384	0.0207839308472067	41
0	0.137697692076153	0.0474974150021172	0.0720144133426633	72		1	0.323181912243564	0.203176596628826	8.88806764910407e-05	81		1	0.323181912243564	0.203176596628826	8.88806764910407e-05	81		0	0.171546590981315	0.0476092471547876	0.0250539569771179	72
0	0.291658177815276	0.0902484558505067	0.477589296319704	62		0	0.0420532243461517	0.0463893626621027	0.00917186073357297	60		0	0.0420532243461517	0.0463893626621027	0.00917186073357297	60		0	-0.0439968659131057	0.0166210919492316	0.0171851276808526	28
0	0.112096587673552	0.0502794445530819	0.0132364387931793	57		1	0.442560095597397	0.124173190039566	0.117492527383558	74		1	0.442560095597397	0.124173190039566	0.117492527383558	74		0	0.237230780464461	0.126027144837197	0.0426782868865059	74
0	0.142166332448834	0.0764178532067698	0.0372958920234765	69		0	0.103443791000563	0.0588736304869079	0.00836894806923273	66		0	0.103443791000563	0.0588736304869079	0.00836894806923273	66		0	0.250707037019308	0.212777895756494	0.0203535339515935	89
0	0.236917309748157	0.040436657042881	0.101506018388243	48		1	0.496767580248411	0.236654997110592	0.740595761303727	74		1	0.496767580248411	0.236654997110592	0.740595761303727	74		0	0.312997171629132	0.0879212506878223	0.277477347916305	45
1	0.291254168871659	0.0644197105479679	0.386312570354448	70		0	-0.0343342908596131	0.0299509812984896	0.000176378318732536	41		0	-0.0343342908596131	0.0299509812984896	0.000176378318732536	41		0	-0.316115419302798	0.00485621875914189	0.00125958181080623	2
1	0.369656171241378	0.13549497619501	0.168583469150735	83		1	0.383808168926062	0.211627982750945	0.0536996811412239	94		1	0.383808168926062	0.211627982750945	0.0536996811412239	94		0	0.290261467217324	0.177862332953886	0.233732223548518	70
0	0.116440102147945	0.0979499822224564	0.0142072183774699	73		1	0.436544317528942	0.267427348461598	0.16883341066112	87		1	0.436544317528942	0.267427348461598	0.16883341066112	87		0	0.288740476719027	0.11842470936289	0.0300160791386191	85
0	0.196780886761158	0.0716241262134827	0.39068008537752	58		0	-0.0207082771389153	0.0380328320447657	0.00138242883425338	65		0	-0.0207082771389153	0.0380328320447657	0.00138242883425338	65		0	0.0953980306558363	0.0294563286838056	0.117855205956748	40
0	0.0908174526019331	0.0331823235398586	0.0135821861789161	59		0	0.17291300184217	0.0733906870196239	0.0176427532877282	77		0	0.17291300184217	0.0733906870196239	0.0176427532877282	77		0	-0.149234172500712	0.00671822708641948	0.0165410762579348	25
0	0.297360608857049	0.0903984881099558	0.408908861677223	54		0	0.206396475414847	0.099790985677149	0.0527644105082968	74		0	0.206396475414847	0.099790985677149	0.0527644105082968	74		1	0.414887841297438	0.264236555927984	0.0437606338222064	97
0	0.337787038583218	0.19990165914832	0.152389700757196	94		0	0.0535132559571016	0.0374621728819006	0.0174788220914535	50		0	0.0535132559571016	0.0374621728819006	0.0174788220914535	50		0	0.252317975985421	0.150462561189574	0.0153091216802773	81
0	0.560865767988427	0.103089951532937	0.150225662235962	70		0	0.0539761919485108	0.0380684067031232	0.000218041971803913	61		0	0.0539761919485108	0.0380684067031232	0.000218041971803913	61		1	0.260134666791586	0.241848245708462	0.0570111177256719	93
0	0.216942052935163	0.107973263332902	0.0192780863831729	74		1	0.59808140273301	0.259564309280898	0.992077481660074	79		1	0.59808140273301	0.259564309280898	0.992077481660074	79		0	0.189386454067695	0.145089734979625	0.01779756428553	85
0	0.170126288679459	0.0424265470103193	0.315832898493132	45		0	0.0838979373203643	0.0676971457575412	0.0109643213731283	62		0	0.0838979373203643	0.0676971457575412	0.0109643213731283	62		0	0.179789607097093	0.0898403392872887	0.0150365585339473	75
0	0.0219982101582621	0.0260762190007179	0.0355098013739394	46		0	0.164605974700314	0.0728311044795651	0.0129170374741478	77		0	0.164605974700314	0.0728311044795651	0.0129170374741478	77		0	-0.393044579274007	0.00232096363561684	0.000949107653996346	0
0	0.0748760305499694	0.025503456443519	0.0154115893242145	50		0	0.402525173522546	0.0671518870867978	0.578385793675773	67		0	0.402525173522546	0.0671518870867978	0.578385793675773	67		0	0.119156097940779	0.0518099907427566	0.00826070113222109	67
0	-0.0080785982355231	0.020095879645966	0.0228858667732732	41		1	0.337813480183115	0.0524747211196088	0.342923813844956	73		1	0.337813480183115	0.0524747211196088	0.342923813844956	73		0	0.579296622894651	0.328598826200643	0.837145963283329	96
0	0.000410467742570418	0.0277020282868474	0.047153305279182	42		0	0.0771667554533229	0.0650572637426049	0.00775566439644012	54		0	0.0771667554533229	0.0650572637426049	0.00775566439644012	54		0	-0.0260552302903798	0.0231063561805441	0.0132843444745532	40
1	0.531014553261604	0.26090315413614	0.109891501616786	100		0	0.0189241889183789	0.0293371641325996	0.00354331861968969	55		0	0.0189241889183789	0.0293371641325996	0.00354331861968969	55		1	0.0519516015296158	0.0345956027242168	0.0786792542841529	32
0	0.0438292149785651	0.0403383872176121	0.0184168464606899	55		0	-0.103867101227389	0.0193266755650592	0.000102343345472986	48		0	-0.103867101227389	0.0193266755650592	0.000102343345472986	48		0	0.0309101060054507	0.0172885222548407	0.1394688064661	29
0	0.20332160014391	0.0672040110649608	0.351868765654311	49		0	-0.0247129647503704	0.0228440786981543	0.0033773631870951	39		0	-0.0247129647503704	0.0228440786981543	0.0033773631870951	39		0	0.325040689572767	0.188333941393857	0.0898803672366968	85
0	0.282061756603308	0.0821334690594565	0.154326493027973	69		0	0.00287815427186327	0.0165031165135171	0.00714933502047412	58		0	0.00287815427186327	0.0165031165135171	0.00714933502047412	58		0	-0.155089749956765	0.00992295974944829	0.0130653972877084	25
0	0.214413714050095	0.120353110089788	0.0415607520386369	72		0	0.183090878103335	0.0945299434634678	0.0142371801204782	84		0	0.183090878103335	0.0945299434634678	0.0142371801204782	84		0	0.341650387314132	0.170858697778063	0.0592643936934122	87
0	0.238380401344834	0.0722359177152304	0.585407987215488	58		0	-0.0175005366521547	0.0145834579033925	0.00073678386488277	47		0	-0.0175005366521547	0.0145834579033925	0.00073678386488277	47		0	0.162325804580917	0.0235920221042646	0.0147785246172597	49
0	0.146082568017698	0.0461689093801569	0.0873566570211943	57		0	0.186783098769308	0.104013838427841	0.0274648579267563	61		0	0.186783098769308	0.104013838427841	0.0274648579267563	61		0	0.129757704685124	0.02374226052695	0.0213057606011714	67
0	0.12791750224113	0.0747018424766072	0.00478215716269766	71		0	0.172316757024078	0.04127395426912	0.00646613932805132	71		0	0.172316757024078	0.04127395426912	0.00646613932805132	71		0	0.125772789487355	0.0478349915080275	0.0137634805891678	62
0	0.255406465542648	0.148168064502413	0.0213319009177168	87		0	-0.0524488459619068	0.0303419559135642	0.00117998848153172	51		0	-0.0524488459619068	0.0303419559135642	0.00117998848153172	51		0	0.355879851432659	0.247473640499722	0.0204259227949393	99
1	0.429685407518816	0.20391675173576	0.0460579773453251	93		0	0.0365302016880464	0.0217985494289074	0.0557487700077043	45		0	0.0365302016880464	0.0217985494289074	0.0557487700077043	45		0	-0.419989139181405	0.00425861236595657	0.000430468202947788	1
0	0.128123449961646	0.0621364854781016	0.00523166698336265	69		1	0.390560968333249	0.157436428416943	0.402910415495923	73		1	0.390560968333249	0.157436428416943	0.402910415495923	73		0	0.299961465220491	0.151848710869983	0.0512726985038929	88
0	0.126435737232656	0.0507708555886787	0.103833746603208	65		0	0.377990576131916	0.136064099569656	0.0713066007974792	90		0	0.377990576131916	0.136064099569656	0.0713066007974792	90		0	-0.119301485446207	0.017838012925033	0.00535012938390971	35
0	0.228613878977929	0.0250254651836304	0.702808571996305	30		0	0.266065327627543	0.0184856029884455	0.0189225853922264	43		0	0.266065327627543	0.0184856029884455	0.0189225853922264	43		0	-0.175036387714447	0.00620700948356097	0.00730942462377744	24
0	0.125126614932001	0.0265912080993783	0.426388137687584	37		0	0.226758000230788	0.115542923113318	0.0628751256597546	85		0	0.226758000230788	0.115542923113318	0.0628751256597546	85		0	-0.0497192716495885	0.012979351134468	0.00710996047649708	43
0	0.147224503107693	0.0723650545124725	0.132524938994	66		0	0.342438654566648	0.0913473724324636	0.0205627312452797	89		0	0.342438654566648	0.0913473724324636	0.0205627312452797	89		0	-0.225932228390203	0.00731762248739379	0.0064142418898732	11
0	0.325509724159945	0.157400144037258	0.042630603789987	90		0	0.00865112662296484	0.0223023527878552	0.00377832534478997	54		0	0.00865112662296484	0.0223023527878552	0.00377832534478997	54		1	0.496141239942475	0.153814679178847	0.904335977338431	80
0	0.385726627648532	0.200176641769299	0.301581769988409	89		0	0.231038100178504	0.0855153924669354	0.0648860392140086	70		0	0.231038100178504	0.0855153924669354	0.0648860392140086	70		0	0.132550973011152	0.0447776626212676	0.0165952436825457	51
0	-0.0428843126457633	0.0129155046348385	0.00402727093814564	34		0	0.151169251466716	0.0806478262402705	0.0137051466890129	80		0	0.151169251466716	0.0806478262402705	0.0137051466890129	80		0	0.307438277226773	0.234098228164232	0.0291085535183729	91
1	0.2197515157808	0.118225975719441	0.209530970794608	68		0	0.299798133137399	0.171422088066027	0.0019449524236687	97		0	0.299798133137399	0.171422088066027	0.0019449524236687	97		0	0.219604308158051	0.115838866007666	0.0285729538773865	79
0	0.212804793711214	0.0734065107230862	0.125828587471371	69		0	-0.0523442367952475	0.0218636820830015	0.00105068688133578	50		0	-0.0523442367952475	0.0218636820830015	0.00105068688133578	50		0	0.504562193724919	0.197564030628827	0.979626467385405	86
0	0.126632269542733	0.054346232329086	0.050891031027466	47		1	0.430688556780897	0.190799760650229	0.875102778170485	79		1	0.430688556780897	0.190799760650229	0.875102778170485	79		0	0.539546558043428	0.328318542513806	0.376278380755741	85
0	0.221950164609173	0.113770007120553	0.0615281586895572	74		0	0.134019578153622	0.0888306270998515	0.00700851732343898	83		0	0.134019578153622	0.0888306270998515	0.00700851732343898	83		0	0.41642157731356	0.116539066169419	0.0534398846356981	77
0	-0.00770509924913518	0.0270534086395231	0.039400959682664	45		0	0.173892536561035	0.0728055306086611	0.00165515529068818	74		0	0.173892536561035	0.0728055306086611	0.00165515529068818	74		0	0.0366735216742542	0.0352696870127269	0.0779236921602355	42
0	-0.135030238183181	0.00919971379595936	0.0123901379131435	26		0	0.286789961057241	0.0870565009122437	0.138370340264484	81		0	0.286789961057241	0.0870565009122437	0.138370340264484	81		0	0.179985089597017	0.12698804450224	0.00405895634795644	91
0	0.136266744250802	0.0694392785063551	0.0473747142601426	77		1	0.308784783848418	0.204203784164981	0.0990990095028187	88		1	0.308784783848418	0.204203784164981	0.0990990095028187	88		0	0.378521794278591	0.238804807704426	0.0864839250182298	91
0	0.0220607129703649	0.0328459593900962	0.0114096233155105	51		0	0.234456972486861	0.0791346125830752	0.0755623183344665	74		0	0.234456972486861	0.0791346125830752	0.0755623183344665	74		0	-0.0106218793791585	0.0226370316108538	0.0061779330956445	58
0	0.0599956991679174	0.0495166500046161	0.0062656043401867	60		0	0.207566445237138	0.0615186270663639	0.0273263570453356	69		0	0.207566445237138	0.0615186270663639	0.0273263570453356	69		0	0.181924554900314	0.101428346272112	0.0261122804847117	69
0	0.00549343037090528	0.0225018125874243	0.00815167448497859	54		0	0.368220260504802	0.188344045723773	0.039425038396796	92		0	0.368220260504802	0.188344045723773	0.039425038396796	92		0	0.0906263853525949	0.0658354466647853	0.0184226178011015	52
0	0.0317949804538649	0.0245364155340199	0.127425637918593	34		0	0.0927116691047434	0.0380150156825497	0.069380353334017	55		0	0.0927116691047434	0.0380150156825497	0.069380353334017	55		0	0.435574351060259	0.146134011931979	0.155347660115119	51
0	0.235143329427248	0.110823654333634	0.336852359987416	65		1	0.612904372466689	0.391531030502137	0.15824228484246	88		1	0.612904372466689	0.391531030502137	0.15824228484246	88		0	0.379012921632608	0.261128624820148	0.170764974249722	86
0	0.147262114114171	0.0562131092766577	0.0224219681643035	58		0	0.232569971737755	0.0678352732105745	0.0590018754003372	68		0	0.232569971737755	0.0678352732105745	0.0590018754003372	68		0	0.304250463977149	0.170362768796969	0.0590529310049421	95
0	0.197244004525688	0.0775700960251356	0.0128484940810951	62		0	0.259775833824835	0.142245066046699	0.0444512407823327	87		0	0.259775833824835	0.142245066046699	0.0444512407823327	87		0	-0.202810758295098	0.00682280922806277	0.00553488023534891	28
0	0.126602085170401	0.0444290257885748	0.0271881912368848	60		0	-0.102052028014876	0.0176710690360192	0.000331676769698068	45		0	-0.102052028014876	0.0176710690360192	0.000331676769698068	45		0	0.274537456168193	0.178357105659117	0.0401298671927867	84
0	0.115706834472861	0.0526184110200616	0.0342108426385679	52		0	-0.0531234724920563	0.0251735468510116	0.00525235300242171	54		0	-0.0531234724920563	0.0251735468510116	0.00525235300242171	54		1	0.31065156887522	0.157985560219839	0.023854127520629	91
0	-0.103052204540476	0.0122308075613659	0.00686608160017289	21		0	0.0565391918356561	0.0435326664142432	0.00273055550984186	60		0	0.0565391918356561	0.0435326664142432	0.00273055550984186	60		0	0.181905768221205	0.0958195673909007	0.0366725022545231	74
0	0.0632328958052808	0.0308449419845353	0.0168224087137752	54		0	0.0723741440498957	0.0594138634279321	0.00197625601039751	78		0	0.0723741440498957	0.0594138634279321	0.00197625601039751	78		1	0.431606234883564	0.329377807261028	0.0629181861132992	100
0	0.0951718819463776	0.0308796119890963	0.172671781825035	53		0	0.156394840086683	0.0974349871369225	0.0139510954980349	77		0	0.156394840086683	0.0974349871369225	0.0139510954980349	77		1	0.378259553691725	0.0863435551080968	0.016844010377802	87
0	0.26181395203807	0.107184894672761	0.0694683434427788	81		0	0.0988993376681811	0.061400121897419	0.00644232945554933	60		0	0.0988993376681811	0.061400121897419	0.00644232945554933	60		0	0.147783343366771	0.049545170308918	0.128124114953061	56
0	0.00320807882096159	0.0367872972306834	0.0233661386238638	46		0	0.337376254264621	0.142959418473754	0.0672100709930854	76		0	0.337376254264621	0.142959418473754	0.0672100709930854	76		0	0.163010922622673	0.0870913465369168	0.0398583748302831	67
1	0.121277603451756	0.0580375885650263	0.103781369842074	56		0	0.138332958463638	0.0590552923826409	0.254038925094671	53		0	0.138332958463638	0.0590552923826409	0.254038925094671	53		0	-0.163575733822609	0.00735675913912727	0.0108103433130974	20
0	0.0605603150061029	0.0366171537390808	0.032852031511797	61		0	0.122393233507193	0.0403067466259362	0.0118354388970795	75		0	0.122393233507193	0.0403067466259362	0.0118354388970795	75		0	0.299536901444562	0.0652601321105325	0.478236435541406	54
0	0.330538103616266	0.14081640565797	0.10036171955053	88		1	0.311567418045241	0.144240163353403	0.120630201434433	68		1	0.311567418045241	0.144240163353403	0.120630201434433	68		1	0.483996478518167	0.275024569161806	0.0944219073502118	78
0	0.157637841065421	0.0512696670565965	0.00522190801724129	72		0	0.336604393213207	0.283561518527447	0.065645374058909	103		0	0.336604393213207	0.283561518527447	0.065645374058909	103		0	0.196287144663698	0.0406160830048268	0.280329955873309	44
0	0.164091244570218	0.068955444314063	0.0178620238584451	64		0	0.0222178992197269	0.0320843005866839	0.0102486078393973	63		0	0.0222178992197269	0.0320843005866839	0.0102486078393973	63		0	0.339878775133428	0.235919121647141	0.169012106585171	87
0	0.118562154441445	0.0545973320596009	0.0243182367935584	52		0	0.089355693066495	0.0478174010049538	0.000415759393580643	78		0	0.089355693066495	0.0478174010049538	0.000415759393580643	78		0	0.175260555186265	0.066825345984778	0.0719042847458684	65
0	0.0674222671773482	0.0362806597964817	0.0531665928191017	36		1	0.290672964359395	0.0812086424148799	0.0186717391521192	77		1	0.290672964359395	0.0812086424148799	0.0186717391521192	77		0	0.335689154146393	0.214595738583651	0.0303993670852622	87
0	-0.0615589602360429	0.0262375336824267	0.011605257614197	38		0	0.18466952257833	0.0646708638971988	0.0126987090090153	77		0	0.18466952257833	0.0646708638971988	0.0126987090090153	77		0	0.311398226350549	0.135401764057085	0.0693481269101991	84
0	0.0639299687916829	0.0335536873479521	0.0116148050120856	59		0	0.314643758889962	0.174674912886813	0.00800541932125456	96		0	0.314643758889962	0.174674912886813	0.00800541932125456	96		0	0.290480844803607	0.0437812322871784	0.859841452670418	44
0	0.0187030769966628	0.0314510665950337	0.0177196264391844	53		0	0.255497680294335	0.147767351711449	0.0766945177778696	70		0	0.255497680294335	0.147767351711449	0.0766945177778696	70		0	-0.166341252065344	0.00901375941209381	0.0126361559736576	31
0	0.159978075433928	0.0875651067119448	0.00980350025975381	76		1	0.377710001282142	0.299539625825126	0.0290022297655269	98		1	0.377710001282142	0.299539625825126	0.0290022297655269	98		0	-0.162847226082133	0.00651249712957087	0.0211521286604834	11
0	0.509374890208006	0.18274209264252	0.931287575451697	91		0	0.153488776946997	0.076204732804857	0.00373489414178898	82		0	0.153488776946997	0.076204732804857	0.00373489414178898	82		0	0.0516185087714451	0.0320568452285152	0.00802142939806993	58
0	0.145899324399501	0.0953585364971466	0.141732187071636	62		0	-0.018566397417538	0.0201244302648484	0.011564864336273	32		0	-0.018566397417538	0.0201244302648484	0.011564864336273	32		0	0.220223901812973	0.0726781842731971	0.0121492333433554	81
0	0.196501451031513	0.127476253917448	0.0713797997098943	64		0	0.220048905832013	0.0970095052231554	0.0086734108216503	84		0	0.220048905832013	0.0970095052231554	0.0086734108216503	84		0	0.161491784322371	0.0884788847645941	0.0108364644697626	78
0	0.223281622980326	0.127372797246387	0.0247580425883002	50		0	0.0834708136504145	0.0411031924511518	0.00487331369175932	73		0	0.0834708136504145	0.0411031924511518	0.00487331369175932	73		0	0.289675852000135	0.0281108014077187	0.901255499790413	52
0	0.00599676348231701	0.0221356643971408	0.000323887651522831	56		0	-0.112005306858043	0.0378393962551216	0.00122671871152385	53		0	-0.112005306858043	0.0378393962551216	0.00122671871152385	53		0	0.211091130832636	0.0722905407079732	0.0619589247619163	67
1	0.28746933298112	0.0736230338716582	0.0247637989176749	71		0	-0.0420217257657522	0.0229014638808128	0.000821597574089624	64		0	-0.0420217257657522	0.0229014638808128	0.000821597574089624	64		0	-0.156562305327394	0.0153971280120188	0.00910189966041559	33
0	0.21056346733594	0.0445717838106277	0.458494999192401	53		0	0.167869776913987	0.116159940105009	0.0078644361141159	90		0	0.167869776913987	0.116159940105009	0.0078644361141159	90		0	-0.212410607958624	0.00380635696861616	0.00887628928885956	19
0	0.0118944005008175	0.0348492347912988	0.000391833001103723	56		1	0.190616852570072	0.0913718490260705	0.00527850480582872	88		1	0.190616852570072	0.0913718490260705	0.00527850480582872	88		0	0.0200555650300201	0.0255427404570508	0.0747432505671098	35
1	0.48582207616169	0.255324400053315	0.0622664016890416	87		0	0.0942628716779075	0.0678526487843516	0.0107212337956131	78		0	0.0942628716779075	0.0678526487843516	0.0107212337956131	78		0	-0.323696122375983	0.00425391347014576	0.00375807349368472	1
0	0.0180870185383475	0.0314510665950337	0.0177196264391844	53		0	0.217388390350398	0.074758905289702	0.0393346647654788	79		0	0.217388390350398	0.074758905289702	0.0393346647654788	79		0	0.374090370879066	0.166441494898514	0.330049676132886	88
0	0.00756412110860606	0.0507442001491501	0.00580160024656072	51		0	0.209197141101156	0.152268732129033	0.00445199995193314	85		0	0.209197141101156	0.152268732129033	0.00445199995193314	85		0	0.343598230014501	0.178140334322988	0.046643045471457	89
0	0.205374800898119	0.103224592727297	0.0926835808880696	81		0	0.215962539556447	0.0504615356210707	0.00994776386531616	88		0	0.215962539556447	0.0504615356210707	0.00994776386531616	88		1	0.293036940595747	0.116049966603549	0.0467437861027633	82
1	0.505007740439085	0.367428857182493	0.127525740988338	82		0	-0.0346908924362453	0.0238732049886753	0.00315772754806733	44		0	-0.0346908924362453	0.0238732049886753	0.00315772754806733	44		0	0.40544336414068	0.0555703386200471	0.958126792995485	48
0	0.499472098852609	0.163265377098866	0.931983714172214	76		0	0.211231491325098	0.0475024806730413	0.00731353653344435	78		0	0.211231491325098	0.0475024806730413	0.00731353653344435	78		0	-0.212927417618306	0.0053676743277317	0.0121428114124061	3
1	0.23213037915509	0.0876374746685263	0.149596672562178	65		0	0.0579776255618456	0.0601743943175025	0.00218403014482985	73		0	0.0579776255618456	0.0601743943175025	0.00218403014482985	73		0	0.191346188264534	0.0784667586737375	0.0558715841094828	63
0	0.14146918298715	0.0608394326711517	0.0132300414008797	64		0	0.334345889023841	0.0881838385238492	0.0705701609089816	84		0	0.334345889023841	0.0881838385238492	0.0705701609089816	84		0	0.281256160398647	0.111526215506726	0.2328801742431	67
0	0.503764096643189	0.315726585571013	0.825399079008724	90		1	0.268122825853762	0.0933481727399751	0.196768047772355	61		1	0.268122825853762	0.0933481727399751	0.196768047772355	61		0	0.133749831414556	0.0656043705141649	0.0523724662022907	60
0	0.235725243803161	0.0385689849730289	0.454806700101818	51		0	0.0207556224780041	0.0319924506400618	0.00348437921723623	60		0	0.0207556224780041	0.0319924506400618	0.00348437921723623	60		0	-0.116815397138566	0.0117593913569022	0.0236357385046755	21
0	0.394381563913311	0.202390663454591	0.646143484368152	82		1	0.357686077549083	0.103444152952393	0.209520039573131	78		1	0.357686077549083	0.103444152952393	0.209520039573131	78		0	0.343191841375096	0.0908476805745975	0.0262529966572965	88
0	0.0882415513278813	0.0893586502775604	0.12918467730091	66		0	0.23665058713094	0.0519971680802691	0.0336821785497666	74		0	0.23665058713094	0.0519971680802691	0.0336821785497666	74		0	-0.043629968566768	0.0223903824483536	0.0482929655518574	24
0	0.119225402136039	0.0556960750688175	0.0295711197700652	66		1	0.72641261950052	0.211026571813234	0.94706771212675	81		1	0.72641261950052	0.211026571813234	0.94706771212675	81		1	0.382983797190016	0.113712040610134	0.248598771326773	75
0	0.108002534103148	0.0345306746533344	0.419606509176106	46		0	0.245932707610168	0.0549199531892375	0.0502911227707341	62		0	0.245932707610168	0.0549199531892375	0.0502911227707341	62		0	-0.198584449975513	0.00617068222992932	0.0521322750459538	1
0	0.130936321648235	0.0577195783056149	0.108531280642743	62		1	0.195885026838466	0.0776158401537697	0.0313307579578554	66		1	0.195885026838466	0.0776158401537697	0.0313307579578554	66		0	0.256200963503672	0.175233369125889	0.0391814582101098	88
0	0.21219673436653	0.0632895812962544	0.11792898818561	54		0	0.0888793823126776	0.042912184558155	0.0283197343584444	62		0	0.0888793823126776	0.042912184558155	0.0283197343584444	62		1	0.533402915956195	0.201918462247249	0.715982745699418	61
0	0.247208128553947	0.0426633998086167	0.0514531945737774	67		0	0.178307571283288	0.0139350170346169	0.0399882479369435	56		0	0.178307571283288	0.0139350170346169	0.0399882479369435	56		1	0.209109408175972	0.0934957218633567	0.0448952025323043	77
0	-0.0024536643612373	0.0227044376184986	0.0152343204564001	52		0	0.302078765150513	0.0898897310963978	0.1320849096772	86		0	0.302078765150513	0.0898897310963978	0.1320849096772	86		0	0.266145430395729	0.0771566095311144	0.01489286595582	90
0	-0.0252193136605247	0.0112355385375902	0.277071862828025	23		0	0.0846607358762476	0.0443963799092121	0.0021665768530936	59		0	0.0846607358762476	0.0443963799092121	0.0021665768530936	59		0	-0.0304368607783656	0.00815583269515827	0.0640227720762095	41
0	0.244488037276679	0.0807954539286348	0.427813430843621	60		1	0.376634116026485	0.15371912289621	0.0493097329341349	83		1	0.376634116026485	0.15371912289621	0.0493097329341349	83		0	0.262220196344533	0.0698480176908382	0.113277531477856	68
0	-0.115727318867982	0.0158869889263142	0.000477867537655433	31		1	0.385966597628644	0.228937621933515	0.225406503501712	82		1	0.385966597628644	0.228937621933515	0.225406503501712	82		0	-0.321397249548627	0.00487722801198521	0.00469498235052423	0
0	0.0692104971117322	0.0319496997825433	0.0148627630141695	52		0	0.0376527305241511	0.0311533285292542	0.00820498202723652	51		0	0.0376527305241511	0.0311533285292542	0.00820498202723652	51		1	0.467821349235679	0.205584116866676	0.189491246183497	91
0	0.327875745953785	0.105660772307163	0.537685685235468	47		1	0.5857573370844	0.306160505885439	0.844086309869503	92		1	0.5857573370844	0.306160505885439	0.844086309869503	92		0	-0.112248891005962	0.00925579908308508	0.00912373457705252	37
0	-0.0419096529816948	0.0199939077131885	0.0195922607553736	42		1	0.374847567812955	0.0807742119898916	0.271505469412025	82		1	0.374847567812955	0.0807742119898916	0.271505469412025	82		0	0.213097787790629	0.112548652292007	0.0770558992409002	62
0	0.112705497971377	0.0769364512096536	0.0301837208361937	57		0	0.237616352856095	0.0644566965753015	0.00782836126235872	67		0	0.237616352856095	0.0644566965753015	0.00782836126235872	67		0	0.437819814584788	0.21646607916557	0.387694674713635	90
0	0.197930080233672	0.080010227083652	0.0437557258393074	76		0	0.252686706823059	0.0286343349121837	0.0955311997920041	70		0	0.252686706823059	0.0286343349121837	0.0955311997920041	70		0	-0.13774204231556	0.0107186461978354	0.0127742796275232	28
0	0.124476172413888	0.0287400194350644	0.156123484112598	43		0	0.231690632689233	0.0323450807681634	0.360767180527678	59		0	0.231690632689233	0.0323450807681634	0.360767180527678	59		0	0.146044546496598	0.0497041141894042	0.0960567907548534	50
0	0.0645754717875548	0.0509265792074246	0.00297995428276361	64		0	0.141911331303819	0.0496674168044276	0.0744192373714207	68		0	0.141911331303819	0.0496674168044276	0.0744192373714207	68		0	0.129121128876857	0.0729454190857361	0.0478170130282808	64
0	0.136247087218034	0.0654938888791741	0.00835784314234541	73		0	0.255556261610913	0.0975227306406185	0.0143655733562072	85		0	0.255556261610913	0.0975227306406185	0.0143655733562072	85		0	-0.133982857730576	0.0107732065157085	0.00908720859138983	27
1	0.620074137056938	0.268114159559754	0.662135043517721	84		1	0.480384190666295	0.149421858780066	0.815120571270588	80		1	0.480384190666295	0.149421858780066	0.815120571270588	80		1	0.0982070709247103	0.0612850717117001	0.0266886512644751	63
0	0.150727941028083	0.083025466076135	0.0612545676570302	63		0	0.130703073248814	0.0357119100939366	0.0422012065331276	73		0	0.130703073248814	0.0357119100939366	0.0422012065331276	73		0	-0.0467841110192964	0.0136427240470789	0.0955683328475247	23
1	0.230226036385839	0.0543836307932268	0.117211162225204	82		0	0.141410977772917	0.0879556634231687	0.00262049764281088	73		0	0.141410977772917	0.0879556634231687	0.00262049764281088	73		0	0.263904528463562	0.114189493887646	0.030512629666351	68
0	0.358899631488282	0.165139442869463	0.226052474089908	82		0	0.308815254046577	0.165342009921258	0.236595353031869	83		0	0.308815254046577	0.165342009921258	0.236595353031869	83		1	0.454373218882098	0.17496370679241	0.116914452713312	90
0	0.196699197421553	0.0976747649111518	0.0206675988187371	75		0	0.0631869770912504	0	0.228312051434975	53		0	0.0631869770912504	0	0.228312051434975	53		0	0.581766551456928	0.253410912353615	0.983256745057747	87
1	0.296497175025088	0.200120307040519	0.0608100981773254	74		0	0.132657934151824	0.0487447892938776	0.0303126401843762	62		0	0.132657934151824	0.0487447892938776	0.0303126401843762	62		0	0.455768772194361	0.212871281554249	0.321290872595263	85
0	0.305902075084983	0.120179307531116	0.554864468794083	69		1	0.235642537095287	0.118201643141969	0.18348702698283	85		1	0.235642537095287	0.118201643141969	0.18348702698283	85		0	0.378026595461965	0.235736241524528	0.198371136840041	87
0	0.0465058105527764	0.0482854135436178	0.00428942900060256	59		1	0.640313918178464	0.199233712301728	0.816134126163873	85		1	0.640313918178464	0.199233712301728	0.816134126163873	85		0	0.645212419397791	0.363595253306009	0.492956743906256	95
0	0.154987923791476	0.0794085320787579	0.00859768945741573	75		0	0.360631856341208	0.0639218518116947	0.0735559827588198	61		0	0.360631856341208	0.0639218518116947	0.0735559827588198	61		0	0.32603299803812	0.123077518539375	0.347617908102279	75
0	0.330662414201525	0.248319495280813	0.0750349579484323	84		0	0.077410813623064	0.0511373784565056	0.00222206695344001	60		0	0.077410813623064	0.0511373784565056	0.00222206695344001	60		0	-0.266188016322383	0.00498582673410014	0.00421150363091955	1
0	0.204495651916992	0.0408948846281189	0.167136778768417	47		0	0.0867213311802992	0.032172122871695	0.040388907237135	56		0	0.0867213311802992	0.032172122871695	0.040388907237135	56		0	-0.0426653417061626	0.0167886541716945	0.017238395887389	28
0	0.21383822104736	0.174195937855974	0.0444615634296799	86		0	0.0670829512464088	0.0445518706898717	0.00577986157028339	75		0	0.0670829512464088	0.0445518706898717	0.00577986157028339	75		0	0.262607769752269	0.162187533593173	0.108831200119082	86
1	0.344402084721581	0.153405425037693	0.599294907453478	69		0	0.136130932065626	0.0410199114788394	0.0121551114078045	73		0	0.136130932065626	0.0410199114788394	0.0121551114078045	73		0	0.237818314593016	0.0957174683489905	0.0069318242540541	87
0	0.361373785315518	0.175270038103448	0.410884545906278	60		0	-0.0503043703396077	0.0137743302229339	0.000448734234103767	51		0	-0.0503043703396077	0.0137743302229339	0.000448734234103767	51		0	0.395104619844747	0.0368727707416083	0.0842765446635539	46
0	0.0993148684586272	0.0915990673492529	0.00448215577953561	58		0	0.0536786079566732	0.0478856212420241	0.0378386928265367	68		0	0.0536786079566732	0.0478856212420241	0.0378386928265367	68		0	-0.152310606648268	0.00731745619932502	0.0133534096176401	10
1	0.379664036186278	0.123524538807287	0.101516872005965	88		0	0.25279615303158	0.11562484168048	0.0253638097843191	91		0	0.25279615303158	0.11562484168048	0.0253638097843191	91		0	0.438463527599526	0.24833621383229	0.206841638900946	89
0	0.246683661203232	0.125057076480099	0.164420968302699	82		1	0.276624309530203	0.132579670869813	7.08110728860081e-13	70		1	0.276624309530203	0.132579670869813	7.08110728860081e-13	70		0	0.334591759103968	0.0518366085753048	0.0230619151997535	81
0	0.0924879666643413	0.0449488494571739	0.0862957243424387	57		0	0.051903538275481	0.0332298951695096	0.0298092221456036	69		0	0.051903538275481	0.0332298951695096	0.0298092221456036	69		0	0.0376676811378827	0.0183979570146898	0.0263898902421615	54
0	0.302101549378042	0.20266073839596	0.0844291587083883	85		0	0.166194351101609	0.0846341179981166	6.80918920287103e-07	86		0	0.166194351101609	0.0846341179981166	6.80918920287103e-07	86		0	1.69163493379849	0.0610316893121472	0.951302427321219	27
0	0.193476898720479	0.0546759932546998	0.314588292026028	55		0	0.110846859383154	0.082969956059908	0.00171979841481242	72		0	0.110846859383154	0.082969956059908	0.00171979841481242	72		0	0.160424272561687	0.0602283614185902	0.0332521437715527	67
0	0.173023345818856	0.0923971465477994	0.0262346854588664	70		1	0.566053244235721	0.161468327102321	0.207850222583727	76		1	0.566053244235721	0.161468327102321	0.207850222583727	76		0	0.224377017419704	0.116021978946483	0.149002581797253	68
0	0.0843687332912263	0.0438171185003361	0.0449348061551679	47		0	0.10440373340449	0.0299868851776458	0.00933278762704642	56		0	0.10440373340449	0.0299868851776458	0.00933278762704642	56		0	0.307001350730527	0.075413449808957	0.825176977312348	43
1	0.212831938722147	0.0649684352864868	0.0721844759030551	68		0	0.0330722736476818	0.0450922380926775	0.00872520418909034	68		0	0.0330722736476818	0.0450922380926775	0.00872520418909034	68		0	0.362724937754936	0.160216040210788	0.148641641987018	47
0	0.216997583251072	0.108653241154543	0.0280578205277158	73		0	0.415985960850936	0.156209051724006	0.0723633662892885	76		0	0.415985960850936	0.156209051724006	0.0723633662892885	76		0	0.132122890656495	0.0419655915484353	0.0154103650944246	63
0	0.0262715743761326	0.0418281323656307	0.0334703204590992	50		0	0.240712982192341	0.0939667342981173	0.0604498604769828	90		0	0.240712982192341	0.0939667342981173	0.0604498604769828	90		0	0.412375552813646	0.109908887087264	0.156444732826372	61
1	0.353267516010105	0.173638771736126	0.0232593509734186	94		1	0.115307500103814	0.129675405138381	0.00390995809682654	77		1	0.115307500103814	0.129675405138381	0.00390995809682654	77		0	0.121767949675292	0.0658747651395742	0.0162272955162176	62
0	0.142859060641201	0.0354428541996071	0.489343134968611	48		1	0.840281021873896	0.376055883867305	0.966532666390163	85		1	0.840281021873896	0.376055883867305	0.966532666390163	85		0	0.346192711962437	0.197283146229954	0.0287563473566949	91
0	0.261971563611658	0.0971993235604115	0.0145438140233565	88		0	-0.173060723987242	0.0169892718184792	8.81488170056843e-05	46		0	-0.173060723987242	0.0169892718184792	8.81488170056843e-05	46		1	0.22597738191141	0.0735852952356642	0.202831710092615	54
0	0.263117994690571	0.114165605265103	0.0118216229535959	91		0	-0.123400941023219	0.00574952886490658	0.000830261768321702	46		0	-0.123400941023219	0.00574952886490658	0.000830261768321702	46		0	0.123955981247274	0.0843479957102445	0.00812330477190607	70
0	0.0402588019776325	0.0221926580683151	0.0672370339477275	41		0	0.290110588539371	0.13288837954786	0.15300581309043	83		0	0.290110588539371	0.13288837954786	0.15300581309043	83		0	0.148169810864394	0.0990552108431517	0.02457738402745	61
0	0.0179915077609473	0.0317523526602084	0.00445878189192195	52		0	0.207397499585306	0.0623533485376108	0.0158602189944002	80		0	0.207397499585306	0.0623533485376108	0.0158602189944002	80		0	0.391631492139006	0.119452263243034	0.700406066149403	53
1	0.212927677116113	0.100737923357836	0.20102635895505	60		1	0.694361418186461	0.29880070623081	0.817272571488863	79		1	0.694361418186461	0.29880070623081	0.817272571488863	79		0	0.0415386630747398	0.0525882901644201	0.0199527481363097	49
0	0.36999167652912	0.198133824620087	0.382901746956934	70		0	0.284058935543005	0.10867886585104	0.198048065657382	77		0	0.284058935543005	0.10867886585104	0.198048065657382	77		0	0.182961048745293	0.084639676538921	0.0108819998815657	88
0	0.16228948584758	0.0850125645803636	0.0723412175349858	74		0	0.129107320902266	0.0451651286651866	0.124229333664992	58		0	0.129107320902266	0.0451651286651866	0.124229333664992	58		0	-0.157896058067312	0.010101003374782	0.00778916972115437	17
0	0.777564834825614	0.5338533068926	0.403139703346532	73		0	0.277724220359747	0.0961125220826876	0.0277319911572679	77		0	0.277724220359747	0.0961125220826876	0.0277319911572679	77		0	-0.174711131886635	0.00837573199794245	0.00687189946672663	13
0	0.234248641652327	0.152975858528146	0.00577726475286789	63		0	0.199160974004632	0.0546198781123309	0.02283643165382	81		0	0.199160974004632	0.0546198781123309	0.02283643165382	81		0	0.34438486393767	0.0780498290807826	0.027489225068269	79
1	0.288819553327516	0.243173471838862	0.0355445790625549	91		0	0.306034452002992	0.135456122602202	0.032838530762807	85		0	0.306034452002992	0.135456122602202	0.032838530762807	85		0	0.263248361188827	0.116442005600561	0.0210820829321355	86
0	-0.0366026754665828	0.0164786940724732	0.00927962830998797	30		0	0.231207151879561	0.131472622428305	0.0849358491981891	73		0	0.231207151879561	0.131472622428305	0.0849358491981891	73		1	0.455433492012765	0.19665837083211	0.0731380703919698	87
0	0.297629425295242	0.132399525917818	0.0616714578979669	57		0	0.00498655667053657	0.0118841553768267	0.00878659215071765	43		0	0.00498655667053657	0.0118841553768267	0.00878659215071765	43		0	0.0718304069196385	0.0392668515632948	0.0217820717266837	63
0	0.39501717149213	0.283802228522667	0.200357750762603	84		0	0.00272083531001011	0.0435198284539163	0.00479388843053797	56		0	0.00272083531001011	0.0435198284539163	0.00479388843053797	56		0	0.130143252769884	0.0928129377993597	0.00908044810021463	73
1	0.30576356740722	0.21258248855446	0.0119636285565218	89		0	0.129736032344016	0.132053879043026	0.00288439105043891	79		0	0.129736032344016	0.132053879043026	0.00288439105043891	79		0	-0.0297894558739764	0.0314464034447158	0.0114457338758654	42
0	0.150373498785689	0.0755040602229568	0.0249523115276645	70		0	0.10898385496143	0.0358407465653179	0.0731286255538024	55		0	0.10898385496143	0.0358407465653179	0.0731286255538024	55		0	0.294853168436715	0.103310181201514	0.0374612622745551	89
0	0.210139787596706	0.0812877697905364	0.180250993364089	63		0	0.127502288074262	0.0242253725420748	0.00649688144574949	76		0	0.127502288074262	0.0242253725420748	0.00649688144574949	76		0	-0.0112911973606158	0.0359331119116276	0.00656608775094106	49
0	0.220748837414373	0.10212284887414	0.0766277682696855	57		0	0.0875714825416149	0.0311705787186664	0.0499818610825758	50		0	0.0875714825416149	0.0311705787186664	0.0499818610825758	50		0	0.0558882521436539	0.0340829819546139	0.0108369287510345	52
0	0.35444097121425	0.278424329705715	0.0193441632948345	73		1	0.420333560210069	0	0.0846174994538246	95		1	0.420333560210069	0	0.0846174994538246	95		0	0.357361596314091	0.131153387253931	0.0471647691679566	66
0	0.134435675313097	0.073187934470925	0.00171149524497678	66		1	0.633278475425512	0.38537451807936	0.566949323564092	93		1	0.633278475425512	0.38537451807936	0.566949323564092	93		0	0.0666705628677713	0.0367959605146706	0.0180161230729026	57
0	0.288806873835694	0.0851656070891923	0.578065253147302	62		0	0.0432549025696129	0.0183284244060171	0.0030311122967954	62		0	0.0432549025696129	0.0183284244060171	0.0030311122967954	62		0	0.367880451523286	0.18852281801477	0.0760985942493949	54
0	0.425706848224017	0.267077814701718	0.108305087701285	77		1	0.558094114794474	0.306482223935478	0.509404411571769	83		1	0.558094114794474	0.306482223935478	0.509404411571769	83		0	0.277567568319945	0.0460725655060814	0.0467259390565041	19
0	0.161416454491794	0.0494019537888818	0.0959333057055117	58		0	0.0484029453730233	0.0204319835837259	0.0127950041886172	60		0	0.0484029453730233	0.0204319835837259	0.0127950041886172	60		0	0.254529904922285	0.167831239249913	0.0171419516145713	90
1	0.224716993581938	0.134654648650993	0.0625856768890264	77		0	0.0435039468290218	0.026944033625418	0.0212627414303429	60		0	0.0435039468290218	0.026944033625418	0.0212627414303429	60		0	0.356584583121249	0.125082555966351	0.158827656601879	92
1	0.377252327528278	0.194475654164193	0.298588610695874	68		0	0.0564622347609412	0.0258115242105553	0.0185722673386951	63		0	0.0564622347609412	0.0258115242105553	0.0185722673386951	63		0	0.479902560263689	0.130610369371891	0.038119376200548	41
0	0.0963520338244382	0.0466042262147224	0.0255031101317275	66		0	0.183465758538496	0.0727332538024009	0.464303604310869	61		0	0.183465758538496	0.0727332538024009	0.464303604310869	61		0	0.385344025522072	0.0534354834377671	0.771285593523668	62
0	0.260985162927868	0.0953040055176675	0.296733617541676	64		0	0.193412958074876	0.066769651996187	0.0083413992562361	70		0	0.193412958074876	0.066769651996187	0.0083413992562361	70		0	0.107018435009096	0.0816923166065369	0.0200976152522426	63
0	0.194537330140994	0.0360049881733501	0.0516019052389527	58		0	0.161553097891647	0.0328229523501086	0.0227964329220165	67		0	0.161553097891647	0.0328229523501086	0.0227964329220165	67		0	0.0526420545588612	0.0277235110063437	0.0938910630602367	39
0	-0.0594569747918881	0.0115788666321193	0.0125237585023976	41		0	-0.0713156415649442	0.010372179961107	0.00158318702625929	44		0	-0.0713156415649442	0.010372179961107	0.00158318702625929	44		0	-0.113738004644715	0.0131177978001315	0.0058287525019185	32
0	0.204108038775791	0.0736182056874989	9.12582970239633e-07	48		0	0.0582238141015667	0.00560030944528064	0.030402390291395	36		0	0.0582238141015667	0.00560030944528064	0.030402390291395	36		0	0.330736024635042	0.161692332254132	0.0177212412001613	92
0	0.282398997453362	0.12251492483279	0.485161858196996	67		0	-0.0231709588873846	0.0167136568019595	0.0155385467973588	55		0	-0.0231709588873846	0.0167136568019595	0.0155385467973588	55		0	0.257905865415845	0.0879913903003453	0.0179649165720939	82
0	0.0480315538583912	0.0389425312782384	0.0328846142053326	56		0	-0.268461661415316	0.00389304341556804	0.00634051289166002	24		0	-0.268461661415316	0.00389304341556804	0.00634051289166002	24		0	0.248574071946433	0.0944160332026801	0.0327243612182609	69
0	0.136440002841748	0.0568570727444443	0.0411007383638557	59		0	0.158609562642266	0.0775657190043411	0.0368686246457139	82		0	0.158609562642266	0.0775657190043411	0.0368686246457139	82		0	0.0302439373255469	0.0292223912022933	0.0160924320968847	58
0	0.0691536439361045	0.0425069061546761	0.041737413080646	60		0	0.206110273507428	0.0706917473047457	0.0392222503071389	82		0	0.206110273507428	0.0706917473047457	0.0392222503071389	82		0	0.263240294295806	0.0989667440280813	0.0527749807615638	88
0	-0.00294575733024181	0.0238132211431623	0.00510624873585467	42		1	0.357215697267651	0.212201143217954	0.156573946287104	89		1	0.357215697267651	0.212201143217954	0.156573946287104	89		0	0.387756625196928	0.107379090691644	0.365966474961302	66
0	0.231907346694428	0.195102439483127	0.0196284208655514	89		0	-0.0672222604701089	0.0108091145650279	0.0184963754238639	40		0	-0.0672222604701089	0.0108091145650279	0.0184963754238639	40		0	0.233455690735582	0.097749095034165	0.127466434060722	68
0	0.453489364027179	0.0731848568647461	0.1192852089903	70		0	0.476239328362185	0.223235906719201	0.266574373619061	87		0	0.476239328362185	0.223235906719201	0.266574373619061	87		0	0.365687236409206	0.157490386096157	0.131712227893753	92
0	0.257160765829893	0.0435025877692317	0.0760497204925621	53		0	0.209341313871219	0.0577400152413722	0.400277998092402	64		0	0.209341313871219	0.0577400152413722	0.400277998092402	64		0	0.259719096730821	0.0755827192096234	0.125675040646791	64
0	0.0322230024713375	0.0298735302034938	0.0217941633575336	45		0	0.000189743136535744	0.0203059348367442	0.00576079790436586	44		0	0.000189743136535744	0.0203059348367442	0.00576079790436586	44		0	0.224412228058996	0.136820283608885	0.0248470394736929	67
0	0.315682996523814	0.180249011481588	0.0148073443097482	87		0	0.12788061683704	0.0298553345831233	0.0122489083378458	69		0	0.12788061683704	0.0298553345831233	0.0122489083378458	69		0	0.302841246914097	0.148589758654549	0.0186988773513809	90
0	0.382108003220742	0.0543531093297228	0.320497195815759	60		0	-0.24721397745741	0.00427799684505979	0.000897123946426962	32		0	-0.24721397745741	0.00427799684505979	0.000897123946426962	32		0	0.367543391640295	0.175725934847619	0.0631543698589511	84
0	0.154220631216322	0.0438933983456941	0.0780436267883681	54		0	0.121478433392019	0.0514494626412762	0.00447115277648144	73		0	0.121478433392019	0.0514494626412762	0.00447115277648144	73		0	0.24029809247529	0.0587468400486786	0.195187500487707	49
1	0.502287307801393	0.262695819700392	0.0994350384626013	89		0	0.414003833929464	0.0915613985854193	8.2593673411751e-07	96		0	0.414003833929464	0.0915613985854193	8.2593673411751e-07	96		0	0.978468479982426	0.680190183195184	0.378453475541525	79
0	0.0450188250988659	0.0299857192253601	0.0251905031426297	55		0	0.295811362935099	0.118145853986075	0.0373123758770313	74		0	0.295811362935099	0.118145853986075	0.0373123758770313	74		0	-0.0674357271564488	0.0137604562054429	0.0167832079303931	34
0	0.211567550630828	0.0996934014896006	0.014150665034401	67		0	0.287700525292352	0.133706817097331	0.176378050960508	59		0	0.287700525292352	0.133706817097331	0.176378050960508	59		0	0.302317622937561	0.131424636348903	0.231251108404355	72
0	0.0993176611972148	0.0558565624680392	0.00432315652638102	55		0	0.0140523885553412	0.0125436626355201	0.0193305270232816	60		0	0.0140523885553412	0.0125436626355201	0.0193305270232816	60		1	0.354098489712164	0.133466362855249	0.212395991030182	73
0	0.385667266561789	0.145347608070706	0.538266295553086	75		0	0.0805876843551268	0.031880370502077	0.000873463895543327	79		0	0.0805876843551268	0.031880370502077	0.000873463895543327	79		0	0.0912567899556422	0.0428204622556357	0.0121527135432128	63
1	0.187386045396664	0.109292147953131	0.0162177395294057	77		0	0.351797721495538	0.292478782033862	0.050919197962747	103		0	0.351797721495538	0.292478782033862	0.050919197962747	103		1	0.272737645701456	0.208065169496029	0.0178347679671432	92
1	0.187677656040293	0.0482199970362369	0.0543304723566919	75		1	0.50949356213774	0.406681892554102	0.187356405325999	94		1	0.50949356213774	0.406681892554102	0.187356405325999	94		0	0.151608738177663	0.0461025226546476	0.0352709652475345	59
0	0.193960074695428	0.122140380918871	0.00686426132644607	80		0	0.199294328110601	0.10657923183362	0.0732469912410374	78		0	0.199294328110601	0.10657923183362	0.0732469912410374	78		0	0.428503609688109	0.233811026545846	0.479757502899277	83
0	0.266578471030471	0.0828145778103876	0.0898180214274969	78		0	-0.0898323887483166	0.0145138108032894	0.000476093105426888	45		0	-0.0898323887483166	0.0145138108032894	0.000476093105426888	45		0	0.00701591649424333	0.0426669235019626	0.00827648905112183	57
1	0.445130997018066	0.291982176308957	0.189170383340791	83		1	0.679575332166208	0.280599249619076	0.0650317969074308	96		1	0.679575332166208	0.280599249619076	0.0650317969074308	96		1	0.327238613395146	0.0962737182886632	0.0800693614918859	61
0	0.402024377425728	0.130641346849787	1.34567144778635e-11	76		0	0.0677571247879103	0.0444031687948624	0.00472479592330152	60		0	0.0677571247879103	0.0444031687948624	0.00472479592330152	60		0	0.328043523292615	0.191424835534268	0.0244902462964534	70
0	0.202282860122038	0.0535708542175765	0.0166440573397877	79		1	0.294158078707301	0.18096122981344	0.221755209819136	81		1	0.294158078707301	0.18096122981344	0.221755209819136	81		0	0.260137724929565	0.220857677588612	0.0146058640528364	87
0	0.212107821200669	0.114250672498659	0.0253148391654872	72		0	0.0314979814266848	0.0323277592543925	0.00827890732759595	45		0	0.0314979814266848	0.0323277592543925	0.00827890732759595	45		0	0.20667385825767	0.0755302769182703	0.0445637604564477	77
1	0.276439595001084	0.119814164160112	0.0133506331165482	88		1	0.298838543409118	0.116132819809878	0.590243016398327	71		1	0.298838543409118	0.116132819809878	0.590243016398327	71		0	0.24342811065336	0.10306303131853	0.103451408983974	64
0	0.229776875054102	0.112540806893828	0.205468822993093	74		1	0.467457464322425	0.051732492273384	0.883778676718459	59		1	0.467457464322425	0.051732492273384	0.883778676718459	59		0	0.261719413226102	0.111097253069575	0.179012157355787	64
0	0.316768294279521	0.214768889542111	0.0436348390014119	81		0	0.423522139410886	0.171552849221742	0.0375058915379495	90		0	0.423522139410886	0.171552849221742	0.0375058915379495	90		0	-0.221257337106843	0.00432421124863307	0.0167989835899535	3
1	0.671902300287388	0.335494751055247	0.983845977209848	89		0	0.138102439187527	0.083397752551341	0.000587580282789316	83		0	0.138102439187527	0.083397752551341	0.000587580282789316	83		0	0.218946923857615	0.140924228447758	0.0194490216178055	81
0	0.0428114337965234	0.0273653852602429	0.00864219504651797	60		0	0.0161738445693648	0.0208868726323377	0.000582895296550377	58		0	0.0161738445693648	0.0208868726323377	0.000582895296550377	58		0	0.131572720217545	0.0466934559567788	0.0338098303348993	60
0	0.17132720946648	0.114269243749356	0.0023241426024092	97		0	-0.0492184875828695	0.0221636493879922	0.0202328005108097	35		0	-0.0492184875828695	0.0221636493879922	0.0202328005108097	35		0	-0.0621777896040906	0.0222673641533339	0.00988034468863902	35
0	0.146517956340571	0.0504245398037213	0.0786788049517369	59		0	0.0516366341470217	0.0272245665336878	0.0393940339865448	47		0	0.0516366341470217	0.0272245665336878	0.0393940339865448	47		0	0.0340253430304955	0.0208577315566476	0.188255165196574	25
0	0.24139692784486	0.10707318892749	0.00694267036549196	92		0	0.214764206845694	0.0799850780278875	0.00118110867858862	75		0	0.214764206845694	0.0799850780278875	0.00118110867858862	75		0	0.10214306385359	0.039173078096006	0.0644108194408399	45
0	0.360122137452162	0.178937507683178	0.112672983780422	78		0	0.109522031453902	0.0584742145647992	0.000691877228578193	69		0	0.109522031453902	0.0584742145647992	0.000691877228578193	69		0	0.339950841799534	0.0968792480370501	0.125864053518705	74
1	0.391912968317984	0.240222748525412	0.171876811065724	90		1	0.823982542892849	0.228163337706265	0.492440742517719	84		1	0.823982542892849	0.228163337706265	0.492440742517719	84		0	-0.0205224317772042	0.0154759234211301	0.00666568630855299	47
0	0.0780628675496584	0.0286642394866486	0.00434203424018745	62		0	0.13117938306134	0.052374276639064	0.0100932894303525	77		0	0.13117938306134	0.052374276639064	0.0100932894303525	77		0	0.268181543986345	0.0519393475747468	0.359842843381634	45
0	0.0814036410171815	0.0241910893295838	0.0188071867580076	41		0	-0.0468441661017475	0.0196532843553105	0.00122965650459971	61		0	-0.0468441661017475	0.0196532843553105	0.00122965650459971	61		0	0.260162597936986	0.183536520552282	0.0323868736360001	87
0	-0.139696375160485	0.00469859804528691	0.0076363648961008	32		0	0.263553450560431	0.122368256602493	0.0157163906722409	95		0	0.263553450560431	0.122368256602493	0.0157163906722409	95		0	-0.051774530712896	0.0103544509752627	0.00670724985256684	43
1	0.295185000684501	0.192227202855466	0.0225746810808308	89		0	0.321403926171516	0.112947850921977	0.0639905643524115	92		0	0.321403926171516	0.112947850921977	0.0639905643524115	92		1	0.362806941432736	0.245005433392686	0.0289289387495401	95
0	0.127275279382187	0.0468802568771641	0.00574183576424952	61		1	0.684204153864898	0.3581105093344	0.116188510154207	97		1	0.684204153864898	0.3581105093344	0.116188510154207	97		0	0.0309794539371105	0.0291446960710333	0.0204510849227146	40
0	-0.0133210659138338	0.0182493512722038	0.0180895104349125	45		0	0.0644495604931188	0.0269577213057011	0.00400467587105975	62		0	0.0644495604931188	0.0269577213057011	0.00400467587105975	62		1	0.212969689175228	0.0986620809102384	0.0387986426734154	69
0	0.0352200035918686	0.0488505772857302	0.0229430716518243	52		0	0.00869999849223372	0.028158891996331	0.000938874038734408	67		0	0.00869999849223372	0.028158891996331	0.000938874038734408	67		0	-0.0428132888402674	0.0167699544546826	0.0172324691961565	28
1	0.266017574154948	0.123872455385559	0.187902542545781	68		0	0.324782781099611	0.153538725302473	0.468300096503255	85		0	0.324782781099611	0.153538725302473	0.468300096503255	85		0	0.166107244803681	0.103663314967436	0.0128717034822961	76
0	0.612194859673231	0.340661370463693	0.892966489166163	92		0	-0.028008336347513	0.0107281248456934	0.0124143712125659	48		0	-0.028008336347513	0.0107281248456934	0.0124143712125659	48		0	0.324455325273479	0.0986640936059822	0.127053559094519	71
0	0.541732870676303	0.0605422191927824	0.996038933672644	54		0	0.108624405167181	0.0533504664993594	0.00713572640733615	62		0	0.108624405167181	0.0533504664993594	0.00713572640733615	62		1	0.489172583188834	0.223867548584931	0.883010874327243	75
0	-0.0199380089317493	0.0239577566402878	0.0330129588730012	47		0	0.265491361179094	0	0.0897828748070225	87		0	0.265491361179094	0	0.0897828748070225	87		0	0.228838450194674	0.159759254751322	0.0229082789253648	83
0	0.00552463935117354	0.0260805389681123	0.0353324776874928	35		0	0.275250015871193	0.120946655470166	0.0218944159179066	87		0	0.275250015871193	0.120946655470166	0.0218944159179066	87		0	0.182915438976818	0.0804307724889068	0.0148763263679151	78
0	0.071642374605205	0.0379494056539946	0.0536663555865883	46		0	0.31275842952517	0.159085299123828	0.0952601462985876	87		0	0.31275842952517	0.159085299123828	0.0952601462985876	87		0	0.0679445422145897	0.0568993732638128	0.00546931635488439	70
1	0.0463868621846484	0.0146087776101821	0.267770265169064	27		1	0.349552423455242	0.263418441411053	0.0635603090931027	85		1	0.349552423455242	0.263418441411053	0.0635603090931027	85		0	0.440845872416925	0.142705304442953	0.178776210805834	73
0	-0.0434208548533907	0.0150302904286365	0.00492115401779403	44		0	0.246125692074643	0.154464139788057	0.0773614530751367	88		0	0.246125692074643	0.154464139788057	0.0773614530751367	88		1	0.608980800464304	0.25647053524684	0.870302819599058	88
0	-0.0162891713289295	0.0237207986738646	0.00510624873585467	42		0	0.148029277076804	0.0342599055819858	0.0123887430157308	72		0	0.148029277076804	0.0342599055819858	0.0123887430157308	72		0	0.318719776997375	0.145613092287443	0.0157225970829202	96
0	0.0412141742177888	0.0118822175555125	0.00109586269089227	46		0	0.159664580544253	0.0866223291045094	0.00271119474294366	88		0	0.159664580544253	0.0866223291045094	0.00271119474294366	88		0	-0.0324908616994495	0.0303616720156267	0.0113057570411341	42
1	0.502455210256508	0.152919985580491	0.949879506574322	79		1	0.364964963423884	0.149656660246581	0.0166188218344458	85		1	0.364964963423884	0.149656660246581	0.0166188218344458	85		0	-0.248530427915171	0.00411301251678972	0.0130627377754883	3
1	0.356892671871789	0.126788626308357	0.266695022189753	76		0	0.286375915922037	0.139975787600477	0.249440983189371	77		0	0.286375915922037	0.139975787600477	0.249440983189371	77		0	0.192891467815879	0.0657490534541032	0.0344282860296696	68
0	-0.00251611862451325	0.0349286654837466	0.00581387048455738	33		0	0.089025799624855	0.0564695347169313	0.00171701766268073	61		0	0.089025799624855	0.0564695347169313	0.00171701766268073	61		0	0.211557337119382	0.0999916437620717	0.039035766961062	83
1	0.430270160818863	0.204912298332489	0.104245206056082	87		0	-0.0440986345625772	0	0.000905565549768902	60		0	-0.0440986345625772	0	0.000905565549768902	60		1	0.274276409064809	0.117495973026415	0.0605208966274316	72
1	0.434296068985663	0.149019849821344	0.607022659087455	75		0	0.173314986990881	0.0961981429390083	0.0355959006251211	79		0	0.173314986990881	0.0961981429390083	0.0355959006251211	79		0	0.18575370700379	0.0981616498668197	0.0758706941534116	64
0	0.262311139778168	0.10987662506381	0.153619804190557	73		0	-0.134595574242844	0.0076447170397369	0.00981626399188762	30		0	-0.134595574242844	0.0076447170397369	0.00981626399188762	30		0	-0.228532849167663	0.00297645135504862	0.00423442844694133	23
0	0.183199804962957	0.0505591050915801	0.0212049457628818	72		1	0.458211532945327	0.135727448746387	0.550440379783549	68		1	0.458211532945327	0.135727448746387	0.550440379783549	68		1	0.485242303175607	0.33723956810124	0.377633320435846	85
0	0.17975064583034	0.0872173769111744	0.0384220205428503	63		1	0.360453674803678	0.121558998713876	0.666751769220162	74		1	0.360453674803678	0.121558998713876	0.666751769220162	74		0	-0.0454328172251863	0.0238074747407666	0.0069510772661942	45
0	0.636625222801454	0.218702944304156	0.733074779018312	83		1	0.480627161763133	0.235126200911772	0.672358153186208	80		1	0.480627161763133	0.235126200911772	0.672358153186208	80		0	-0.210813688560109	0.00404621810361497	0.00810783632184766	20
0	0.130305706527719	0.0308228167170489	0.0035884688447807	45														0	-0.0221634600511262	0.0202722417259443	0.0359326245489449	41
0	0.428539673110496	0.148086321549256	0.548455219047687	73														0	-0.00664069917231637	0.0146176932129322	0.0644117739649102	25
0	0.244788393985571	0.0573773356891837	0.0793790493962823	51														0	0.40122234307054	0.197939484707343	0.0213112149205579	89
0	0.153346134639585	0.038381452431122	0.0466535248277093	64														0	0.307428472068389	0.154556775530221	0.0779106286698438	61
0	0.296084524977464	0.170653591598441	0.236954790412871	67														0	0.169195990981565	0.08444445128649	0.0103940644329629	87
0	0.168998629334083	0.0780616530844566	0.0460317613896398	61														0	-0.409664190019338	0.00224089850523247	0.00053101116876368	0
1	0.787279568383018	0.55040833522638	0.791100061110996	79														0	-0.0805445794680716	0.0170919009534862	0.00607992108058862	36
0	0.0938222001662214	0.0275488977112363	0.0420128871849059	51														0	0.250109665284802	0.140235786631644	0.0295588973250158	91
0	0.213238157187384	0.10184144407367	0.0780316774677528	80														0	0.160930894629546	0.0953257893338951	0.0255788180347915	72
1	0.431748032457711	0.130083242897286	0.869143070711015	65														0	0.191431305459941	0.187469909551062	0.0188086968899246	84
0	0.0116534719138614	0.0148076392017793	0.00617369504312963	41														0	0.226887526020472	0.0720212095053196	0.0322122457137591	70
1	0.213787198979452	0.114146862317053	0.0266180520762943	81														0	-0.185227726768878	0.00853836376402576	0.00825362980740241	13
0	0.298650711886796	0.0852161077872468	0.611639276371397	69														0	0.413320138211768	0.27422335474276	0.0530757721869321	93
0	0.300584947056498	0.151596356538815	0.0954818667462386	62														0	0.0639782435778925	0.0558736100907743	0.0123284981379847	62
0	0.145027119066632	0.0426143743224062	0.0359764239639059	63														1	0.318017831629463	0.289324555224592	0.0249153461815295	92
0	0.208555580132639	0.0908529540158355	0.0503857756339196	78														0	0.337737164644385	0.188772924174743	0.0703597706215963	88
0	0.128745390265971	0.0771648358018612	0.00408171927262815	77														0	0.270253675790177	0.130433540435133	0.176759794919393	73
0	0.196235858707837	0.0600658663214486	0.0844300927588933	66														0	0.231252322716338	0.160287274872837	0.0178459031686812	89
0	0.19956074082255	0.0862971504879662	0.0146230253699912	65														0	0.220059984588141	0.0727717041864218	0.240532021548069	61
0	0.175059483548015	0.0410758954258779	0.00963040503806876	70														0	0.0822949382569907	0.0231710457941687	0.283773618870687	45
0	0.166206970007211	0.0868096400904471	0.0224492738295732	71														0	-0.0412879464916896	0.0244867325637741	0.00982189896969354	40
0	0.282550496677296	0.115098147088554	0.0334101362702281	82														0	0.0716765473975329	0.0228233919155122	0.219078799402159	46
0	0.261958055609752	0.13783378564012	0.0688320027105614	77														0	-0.110962319108235	0.0118504342637145	0.00759194346882052	39
0	0.0079283506782978	0.0229833156880235	0.016491082627847	41														0	0.425002759707705	0.214130621176759	0.756985631324837	88
0	0.0404060987940834	0.0796984478924307	0.00363908269117959	61														0	0.866149128759446	0.385188021795341	0.956157783801544	79
0	0.265637011053019	0.106336242412995	0.0359387839239268	69														0	0.0150434160579378	0.0273501808406355	0.00704041267748821	49
0	0.182276840175715	0.0236202534965521	0.0283563329391241	45														1	0.379099163712022	0.235906199063258	0.176777995806335	79
0	0.0800393066066961	0.0297184452635067	0.0182764408279428	52														0	0.485510408902141	0.18410058968236	0.352008571939098	89
0	0.046947342117974	0.0284913733314245	0.0122737600889183	62														0	0.698354868511292	0.339556124688263	0.365707131708922	75
0	0.219976498204095	0.122495117896048	0.0329126443723444	67														0	-0.168793233751737	0.00324918106605786	0.0357524359125166	4
1	0.700595955833932	0.248226506655702	0.973400786293901	87														0	0.269104213629184	0.042142025856928	0.0170419915545673	54
0	0.13164516069196	0.0378630361037141	0.0943000870295691	62														0	-0.0302638935486795	0.00788895375317184	0.602005841680076	12
0	0.342930363299142	0.0637582918965648	0.909231471539477	48														0	0.165174583488401	0.0772862464420645	0.0115586592311128	88
0	0.121541706997574	0.0546592373014089	0.0578671233703613	63														0	0.123799385664744	0.0798805217295183	0.013049945402273	60
1	0.263586330817095	0.123872455385559	0.187902542545781	68														0	0.314911829297828	0.112240693887564	0.036680822828729	80
0	0.174905870931844	0.0756406052073532	0.0501241712927867	68														0	0.251083371066917	0.0709613239243437	0.133720264100667	49
1	0.912203981166741	0.567976941992602	0.996623482123001	83														0	0.321514744617356	0.11098067285397	0.0320973228556752	86
0	0.418249461903669	0.165769942873093	0.543201550487569	81														0	0.285153891999624	0.0593931696974502	0.0114993786610452	58
0	0.2667128356338	0.0961893564765989	0.503792448082676	56														1	0.466227999324228	0.264458334498093	0.0689113133278693	55
0	0.200829387081384	0.0596896972884522	0.0261270205875319	70														0	0.173329535389347	0.0999522058250551	0.0155338936489227	48
0	0.293047080692755	0.139894333209196	0.066683929986773	81														0	0.0445840662905586	0.041841548121684	0.0102412182672107	47
0	0.170237759921541	0.033189555162402	0.495215416860286	40														0	0.531497464548721	0.198403976676957	0.799087261338249	73
0	0.318757369985193	0.0685514853256755	0.801012353668572	41														0	-0.0315261783993984	0.0362327721960902	0.00333850936341879	51
1	0.474791596970623	0.165327879107584	0.283241548652274	88														0	0.436222295014934	0.111481375507464	0.548283172570738	48
0	0.29362385409419	0.120499463402143	0.00859588260658632	84														0	0.246303758392463	0.118221591408889	0.0264512860291079	88
1	0.661986481856824	0.284366148479753	1.04194505536569e-05	92														0	0.544299560736783	0.142474751875506	0.818807820715629	67
0	0.588376502417683	0.132442893315401	0.994744960686462	69														0	-0.0236721604675608	0.0369788016021244	0.0150746038403489	38
1	0.192212588442352	0.0499826295247707	0.0614966388617341	64														0	0.198357471335508	0.0463837726834923	0.016899246441819	74
0	-0.0321469039836083	0.0116844559990985	0.0400038368585041	33														0	0.336638348424433	0.0970118378284396	0.807908016540084	68
0	0.320963799204176	0.106676712361255	0.163921080178762	92														0	-0.114850734983522	0.0188262391030645	0.0113668312396894	30
0	0.145822738154089	0.102536826125586	0.0243811685083604	55														1	0.446569377077123	0.286576419415037	0.119650557649575	95
0	0.248093831560261	0.0830691115858779	0.152170504487167	57														0	0.414187494737806	0.191847395578797	0.217027563155914	92
0	0.163804738590217	0.0407475793841528	0.163765312776528	56														0	0.125699414211302	0.061542317642376	0.0281676412797985	66
0	0.497511909395459	0.179402387640306	0.974012312669145	71														0	0.392819402717773	0.195877562670937	0.222829890823884	81
0	-0.0187031574168795	0.0175333100361322	0.0207352696493699	42														0	0.33113447707721	0.125771100340361	0.109210043377405	50
0	0.29493885987256	0.15974427555118	0.0429650499962962	84														0	0.3144695532887	0.186369562633253	0.0618397627266427	95
1	0.308697319319223	0.102086013738607	0.184631243296363	71														0	0.0294747031716732	0.0252557678189742	0.0064498314270611	56
1	0.247480827970861	0.0639300169536348	0.303405785539879	75														0	0.15052019099726	0.0424304352704356	0.481076217797651	35
0	0.296318708570837	0.139348863740927	0.421721384458838	65														0	0.304184939592116	0.0416659793440849	0.0459388232896941	59
1	0.243729926682063	0.10524840182586	0.0214550029254745	91														0	0.183438309071808	0.131192339317955	0.0203768637720879	69
0	0.164276017281825	0.0531263942380564	0.122432081081154	62														1	0.0532081213722196	0.0479601388969086	0.00933642222871817	50
0	0.240429140977219	0.115961972772829	0.0158920139570338	85														0	0.253911842750924	0.141958126015118	0.0131170823994824	89
0	0.437205972485805	0.0910980587078735	0.233298016510918	77														0	-0.0948198185117085	0.0238201680118225	0.0013820060258249	59
0	0.23697966822655	0.103555777293456	0.0668494846924276	67														0	0.455224827600293	0.233604606702479	0.203789796743039	82
1	0.241996233374389	0.0716853678775178	0.00991831976343697	87														0	0.094571181494751	0.037361493253402	0.10026070379916	40
1	0.338450405916429	0.172588261826197	0.156506861259083	85														0	0.108913473941965	0.0349389577099414	0.00881469646527072	61
0	0.399127335875318	0.0989073539746713	0.839161859044588	59														0	-0.236217327047575	0.00501306308106021	0.00370514074257861	22
0	0.671876924484272	0.11997266457979	0.799080214451606	60														0	0.238249486921402	0.0529483967188303	0.371168728383963	61
0	-0.0650992922586231	0.0140958988269707	0.014044949280116	38														0	0.229739793980253	0.0832537829963156	0.0372874914420053	71
0	0.322240104912416	0.166632336806336	0.0319887039814053	87														0	0.336095031161852	0.122406287542664	0.0183224651139795	95
0	0.0356985368204282	0.0279382087177916	0.0659275300633579	45														0	0.139556043330576	0.0358228038197013	0.100476581949296	56
1	0.632225354935395	0.171669364594217	0.975154786203538	60														0	0.292471701099109	0.199805084606959	0.0185509486637926	94
1	0.190896323788298	0.0699229071893024	0.0576199426514191	81														0	0.151616376209696	0.0761235618014132	0.0840664420634593	65
0	0.120023274702231	0.0204018996639211	0.074840711597771	46														0	-0.117717061091028	0.00585403492009048	0.0425317644899666	19
0	0.241312914438922	0.0530890036940342	0.107746239364906	51														0	0.382297141123627	0.0770889753889675	0.696996879288103	67
0	0.245897451352583	0.170145593505132	0.0187708110607565	89														1	0.413599717510563	0.214047285682534	0.0650621941864961	88
0	0.382589874855184	0.117965701520081	0.0308954373331023	82														0	0.348368448723385	0.183830885771803	0.140260373782116	73
0	0.411919207349024	0.151376402775366	0.299472733345814	57														1	0.509712937897889	0.170211870863878	0.767224999648796	67
0	0.0847738920413102	0.0680709843831194	1.16250261294673e-11	73														0	0.173518298361848	0.0821212185943399	0.0284167112144702	64
0	0.152479083518975	0.0619860514721414	0.0169144324226222	72														0	-0.0190785564729175	0.0116573317430083	0.0140313070970061	49
0	0.285167930246179	0.0922343118205278	0.102247606144437	80														0	0.0275437927117882	0.0284090757354293	0.0202889429115898	40
0	0.0746766818396149	0.0627434121922143	0.0360315745067249	51														0	0.0702818696080732	0.0457895721519527	0.0132774935667283	52
0	0.0387951006458445	0.0592213855027422	0.0696248131617743	62														0	-0.0528894686760166	0.0214904671114117	0.0126476460871196	35
1	0.23204646591853	0.107755766024925	6.31321726354559e-05	87														0	0.21907582166837	0.0929047739003125	0.0325762398817569	56
0	0.184945444992296	0.12178797296304	0.00893584178594236	78														0	0.269111755643678	0.101593039447539	0.0174801782811296	88
0	0.265914861009467	0.196906791641348	0.0220303860226292	86														0	0.184915442714866	0.0958439465208978	0.0236424295820388	77
1	0.465679043882383	0.22332260031988	0.444127854155712	86														0	0.296314732143362	0.124230185245487	0.162912404026146	59
1	0.358983223262835	0.230098705615407	0.0872197061133401	88														0	0.144431564112134	0.0557484489603805	0.0123224784648665	69
0	0.350315647425425	0.155776065819681	0.218213811728707	91														0	0.20367446430522	0.148855653367751	0.0282078132881178	79
0	0.220141813677938	0.0830691115858779	0.152170504487167	57														0	0.0804544608416753	0.0180984717227264	0.214101865765013	21
0	0.772793544344808	0.121467677827023	0.999995932077582	89														0	0.171346713442227	0.117673605384827	0.00939363882501387	89
0	0.306416307554491	0.173599916760876	0.278252392183993	80														0	0.203357214134465	0.0367387585516419	0.130898787567545	63
1	0.313559445861093	0.0883092962337728	0.318134122167568	62														0	-0.177169833546704	0.00946272861985071	0.00640236495808601	5
1	0.266282137527943	0.126844054980899	0.093131843446631	85														0	0.264626924695449	0.0735327738696068	0.0240947029819693	82
1	0.334161512309763	0.171247552620945	0.115498678763089	83														0	0.380515745842544	0.283787160754217	0.0792133824220658	94
0	0.0405555970820704	0.0144714610676245	0.0308304146242929	43														0	0.228557439153459	0.151121487332583	0.0216579368671771	86
0	0.371546957631131	0.110552125164887	0.640509012103926	59														0	0.252205560952552	0.197547761039037	0.0784178261174194	88
0	0.15385484841861	0.0719572024115821	0.099525055227311	55														0	0.291495902264339	0.133007989610248	0.0260663235160336	64
0	0.245304516115393	0.0922973869591851	0.289825454718488	65														1	0.20659660362241	0.0728090537552222	0.0536224681014123	45
0	0.268008471158693	0.0734776756502983	0.107827101229478	80														0	0.283066079357645	0.201698484215098	0.0237876737802809	88
0	0.228264846512822	0.0665976056599597	0.0343977503711629	78														0	0.289831094759336	0.108666157349325	0.0230562305179006	73
0	0.164779186953617	0.0542864897305127	0.000286808513164371	69														0	0.406469614963484	0.101761811382563	0.0632167607151844	69
1	0.575862507906177	0.312309241497389	0.376463607196925	84														0	-0.126871580657453	0.010377521219938	0.0035128511045878	33
1	0.486258803907274	0.16961126434638	0.0918836143621562	84														0	0.232470626949798	0.123119721326565	0.0191209264236412	88
0	0.376903798174489	0.140909328643868	0.23802557713109	88														0	-0.0880007138751511	0.0166322524733845	0.0210451566319862	29
0	0.129998763154582	0.0580267153421674	0.0497242758568408	69														0	0.428998539827097	0.220171048088324	0.0466557980574803	90
0	0.209939121268669	0.0328806589919782	0.0615158029658818	52														1	0.447239945217195	0.343549703077253	0.241939532356629	91
0	0.335284584536339	0.093913418378252	0.429450384910741	55														0	0.316022142901197	0.171850910978307	0.0323239219133013	82
0	0.27593851179265	0.141193314105075	0.418359629403241	65														0	0.0468596594931335	0.0340726184846829	0.0324397172118848	42
0	0.227605599533494	0.124276215359576	0.0318926959248438	69														0	0.151554600439023	0.0730076059106808	0.014599423833787	65
0	0.239521114840886	0.066799906787446	0.111788130672882	65														0	0.114878109313649	0.0803017635689367	0.00488236492322883	83
0	0.104500366169884	0.0833545184074242	0.0110035595480256	55														0	0.529036167955348	0.388014190937495	0.157747937227015	87
0	0.17697671082399	0.0982108477966257	0.0168195641707544	66														0	0.374789890617884	0.144289496237739	0.222294417883631	80
0	0.368650052648058	0.0771948235631117	0.318563353694688	88														1	0.334562972552851	0.0485779175635895	0.352152751297327	28
0	0.0659411657174366	0.0453362876401283	0.00561731175494855	57														0	-0.138101494096328	0.0276231286824626	0.00238766609255655	47
0	0.0479549846498011	0.0473038346504115	5.03117185147159e-10	69														0	0.0100938137057019	0.0236400084795482	0.0200451281968214	37
1	0.352149315997802	0.135476477350073	0.256273349315112	76														0	0.0487905399961224	0.0213361530574935	0.0355309787788887	43
1	0.42895985832874	0.223709913926217	0.0901740329612233	82														0	0.424008104810209	0.305173709421814	0.120633682533455	87
0	0.308579543407441	0.113192722584914	0.136454081246202	85														0	0.305171346917006	0.227046334968187	0.0414718527663642	88
1	0.706936606842763	0.283031578205176	0.514274786247196	95														0	-0.108374011693736	0.00814568468313219	0.00411976121259505	32
0	0.0434399322845249	0.041744029544266	0.0111111380636642	46														0	-0.0648632633462548	0.0172581719516968	0.00839004584969103	26
0	0.00632657220178614	0.0464611188824802	0.00210290819155163	50														0	-0.0782714130176228	0.0263571742541694	0.00556851609146979	43
1	0.270755038404846	0.143913000067964	0.196088699736647	76														0	0.301224047816877	0.203950841194843	0.0779439793367564	80
0	0.257393618091733	0.00327593729806409	2.64523841481929e-12	34														0	0.214841607759665	0.048315269224047	0.022790180463305	64
0	0.16804900026619	0.0615239366890009	0.0124182156190774	65														1	0.420128880818278	0.277103181605232	0.108710136451994	87
0	0.230681956644903	0.0706831341621281	0.560056924123828	60														0	0.403816030916504	0.231227682412411	0.0655499572301122	90
0	0.193824896830212	0.109307703678433	0.0170370688836262	72														0	0.612817716176509	0.310312546028139	0.206954671247603	88
1	0.478714374315178	0.142053934325242	0.0297303147927871	83														0	0.176461133323056	0.101076782693296	0.0187625967409642	86
0	0.211531513931893	0.0534914519759086	0.266117710285286	53														0	0.314498473744105	0.118323072677709	0.263588753026665	69
0	0.517142019253385	0.140297234971485	0.933242795037231	81														0	0.0969126253630693	0.0672085401653046	0.0225127524330721	40
0	0.258914534438057	0.0259996405684821	0.0659145478945893	51														0	0.150249472579322	0.0786497062407743	0.0155980938840201	71
1	0.200017105869669	0.100271308492298	0.0952677309059972	73														0	-0.0719204644850965	0.0112229114755075	0.00566973078734466	42
0	0.420136955707832	0.248551541691586	0.211758854503737	87														0	0.0387548977628401	0.0308783654357101	0.0208227366738727	42
0	-0.140494599202062	0.00465746869673533	0.00133792584856374	34														0	0.0361904807716905	0.0302958244230266	0.0206994374845291	41
0	0.624605119078935	0.170339951740558	0.996571326172222	87														0	0.0591748574378932	0.0177795864696983	0.0485859747511099	43
1	0.466655284335856	0.275772257344178	0.451717689188896	89														0	0.304279446678329	0.120687449702585	0.0848741069627775	75
1	0.510291992541037	0.183003788432847	0.817319931770081	79														0	0.138494876813756	0.091217866241597	0.00810269411342491	59
1	0.536883581183985	0.275528003456141	0.50008577081168	69														0	0.0398639197495897	0.0373465577872381	0.0260271797566717	42
1	0.362246442105229	0.192295105852003	0.07793009493944	89														0	0.274066096408031	0.0915929512434844	0.0170772120068232	74
0	0.243407848087965	0.0877391028672027	0.0724865064042977	68														0	0.202037933962846	0.130337054101382	0.0286279251373095	64
0	0.402462509302738	0.147209200771585	0.130552340064297	91														0	-0.0690446247094197	0.00593904537513183	0.526501629995205	1
0	-0.0212367998233238	0.0132333761165914	0.0045585400162628	51														0	-0.216562322578294	0.00233920430080683	0.00642813084572298	16
0	0.24040191213542	0.101780343814711	0.0752401616462918	71														0	0.0618732399556417	0.0278920414202638	0.00985553183805724	58
0	0.42073158075496	0	0.0472378453852837	86														0	0.219955582320483	0.0665619834830749	0.0642590449245441	64
0	0.0891694309595177	0.0424828112229117	0.181394670554509	53														0	0.10457474619717	0.0236187264626624	0.0380761138861456	11
0	-0.0340535623418384	0.0177515956264313	0.00796682964691501	43														1	0.211333248934305	0.0556248120754674	0.0961824088528411	62
0	0.272108326569265	0.162500468620564	0.06125807540009	79														0	0.285172322544655	0.155644941726436	0.0564598043957946	87
1	0.639846395878116	0.130112310453944	0.971889918186196	83														1	0.319171180751214	0.173565265717332	0.0350244500909244	73
1	0.696568496806028	0.164232744488405	0.802530359594682	63														0	-0.000110201304897546	0.0273275540560152	0.0178820869046398	41
0	-0.0100589025470523	0.0431995143547946	0.00234059699233669	51														0	0.325987537864202	0.181999836666407	0.0869528793641676	68
0	-0.112004682151958	0.0079373925693943	0.0248902245519657	28														0	0.164376686490191	0.0618509209602695	0.00866993045964253	75
1	0.304391900447967	0.134781443995424	0.0632364614664073	81														0	0.131561528686937	0.0564419442337804	0.0165401461415189	54
0	0.169744439190369	0.0781717936442229	0.118639221461854	61														0	-0.0473710724096621	0.00647718127384389	0.142609422555753	23
0	0.0632654761686246	0.0288353166977663	0.0057614561402043	61														0	0.291750172480882	0.102285238283658	0.0364237886727132	91
1	0.408672464587791	0.130083242897286	0.869143070711015	65														0	0.358565236761141	0.143872367009865	0.464541706542035	79
0	0.141131441218118	0.0606487609072194	0.00456730627213055	73														0	0.192699751136438	0.0757560349521867	0.0841412640339096	63
1	0.299677723543054	0.0614525369341942	0.283926194365769	63														1	0.395162662254658	0.259618089215697	0.0764801904372946	90
1	1.09132584262857	0.69954550946648	0.255316597040822	78														1	0.407064597221869	0.0847044985962745	0.040271081280722	67
1	0.287125777175352	0.0797037248281092	0.150009962948836	74														0	0.214874292150625	0.142275637662771	0.10547453304957	54
0	0.568863963393426	0.130816941519443	0.165570258926267	83														0	0.198895420949508	0.082611056361288	0.103169601362681	61
1	0.240041994404816	0.108038714173946	0.114718140009862	71														0	0.350356425812554	0.0910178181255575	0.401950862525058	72
0	0.127348823380733	0.0470300202588737	0.00582115790872375	61														0	0.368133521579512	0.26482777672121	0.0314965039111639	89
0	0.159514964254065	0.0567159758905953	0.0129246515500149	69														0	-0.0494673415681528	0.0176742324355693	0.0191647227393057	41
0	0.261637768943266	0.0626315732697242	0.0144611911509808	72														1	0.425502604655979	0.134163633990453	0.279306461528596	82
0	0.195050827417966	0.0500112863722774	0.104853531674608	48														0	0.518768131153285	0.229338333398646	0.560247992314408	84
0	0.265452760596864	0.039800497190677	0.85520720736155	49														0	0.27920471741871	0.112083235220013	0.146511104701252	63
0	0.0392432895919409	0.00735533277798403	0.0068560651664221	43														0	0.0866517383336126	0.0191076055883698	0.0173121963233246	61
0	0.163139825746301	0.0513312270543105	0.132491603543652	55														1	-0.0392637919004519	0.0185241546903939	0.106476670340367	32
0	0.0311445360473759	0.0262890558569887	0.0548360088385109	44														0	0.212994183405935	0.0926417267293789	0.0266718171085384	61
1	0.453777263250528	0.0957481650409695	0.913533829775102	71														0	0.310720266921223	0.14655518306814	0.0506390224115746	90
1	0.718714337619159	0.273854328428375	0.706487683554145	53														0	0.0985174574881778	0.0323394837006048	0.105694182941438	46
0	-0.0821246261384573	0.0175896099329554	0.00134597745054032	36														0	0.258785824216415	0.121991518723984	0.0687216665222767	49
0	0.237160209901979	0.118005022577351	0.0570560441567541	72														0	0.317755100560102	0.133762182640714	0.340587431870722	76
0	0.388705513805863	0.1949295264601	0.184623866825536	86														1	0.237518686652679	0.154183150752374	0.0302395408865347	91
0	0.141753570438751	0.049023093653708	0.0385203830877405	60														0	0.168615013343604	0.0833354094367072	0.0370962726148796	65
1	0.29002697624077	0.153105686097958	0.0119451731021276	89														0	0.293515590662272	0.0917589186754491	0.0459558254472482	85
0	0.161170036509684	0.0826297367939254	0.0327550380847383	80														0	0.238864335722693	0.129923205434562	0.0278231081064837	83
0	0.294479503925417	0.101117067145296	0.0466967755010256	80														0	0.0235303306859005	0.0246993767227414	0.0389019665759114	51
0	0.433159272501794	0.124372628979202	0.79440091257281	60														0	-0.0450532363303556	0.0162231091964244	0.00899555448353559	49
1	0.378875704288561	0.196759683033833	0.0239783639285705	91														0	0.0302837744056363	0.03113955479828	0.0363182122067284	29
1	0.503839054230949	0.216652765556835	0.490553894874033	84														0	0.274210123296256	0.17889747754972	0.0848862351765925	82
0	0.28060377929383	0.180862138421227	0.0311726620224086	81														0	-0.0554106071282906	0.0197614837401871	0.00702602030723097	36
0	0.106920033631344	0.0487785984649713	4.21342458287034e-18	72														0	-0.196876908808959	0.00618105509528925	0.0042460367281587	12
1	0.206096886516265	0.0872050480079356	0.00404925085914536	77														0	0.417485184965056	0.155906147749391	0.119685698556012	82
0	0.211530351085528	0.0944028454205369	0.0991266892453199	59														0	-0.339662611011107	0.00200169819812756	0.00155293286533815	1
0	0.23831590094885	0.0670002398961562	0.153335664147395	59														0	0.226044078485875	0.155865762737503	0.0697059945761014	78
1	0.463134934599048	0.272492657657789	0.695361088358876	85														0	0.193400739176013	0.0961086734493	0.0162558465169619	76
1	0.305519086183711	0.137710621209048	0.29936050837202	85														0	0.250511276131813	0.0901497696525876	0.0226051663612654	84
0	0.218058608863611	0.0628963509994063	0.0719655103223186	87														0	0.481426318802692	0.220189715704277	0.297280003030442	93
0	0.404764706169932	0.220061840937602	0.219142766075062	74														0	0.162407807753812	0.0929175599408895	0.0136822828658926	78
0	-0.072302589850526	0.02329679174604	0.00875091210963269	39														0	0.0687677123875594	0.016776027838145	0.00910542917456706	59
0	0.35683447679031	0.155097215491947	0.0547310180980188	83														0	0.261625232659882	0.140586923395043	0.0123881670299445	91
0	0.237519699783523	0.0679629388526355	0.227812436755438	67														0	-0.261216260120407	0.00319889722922364	0.00753384200500479	6
0	0.243033276709987	0.153637829418214	0.197330205851929	69														1	0.30842127511595	0.183450062305213	0.0567150937514241	83
1	0.224670633372743	0.0916630624938105	0.0383774887401869	76														1	0.280074893554207	0.104281486171546	0.270725364947476	69
0	0.0487739359314574	0.0454968591510859	0.0108401306581444	42														0	0.508850039083931	0.120235172205329	0.739567293442012	58
0	0.153564410700753	0.033269882393362	0.201700821984206	36														0	0.172256190497213	0.0916761728312804	0.00533125619907974	34
0	0.434223889538554	0.181983902197896	0.013464658975789	84														0	0.297946465306481	0.231721679764876	0.0577804600206425	85
0	0.219018436736668	0.0901704148682451	0.0773791622853072	66														0	0.201866126755635	0.0792941670346602	0.0129948871419721	88
0	0.0971994399204269	0.0276888648679934	0.036045783122557	45														0	0.408801913391289	0.185707683092524	0.292331006619004	64
0	0.027029518199746	0.0265735662031697	0.00316318730938261	42														0	0.0598779114054103	0.0364420891638784	0.0172100251546868	61
0	0.180566136384994	0.0810403201634614	0.146796988228125	74														0	0.272933387727503	0.182582200839503	0.0607218157409595	86
0	0.376763732108929	0.139922555090814	0.345956496582468	76														0	0.395060049185828	0.0500107022823204	0.654407865564751	44
0	0.0146889437313162	0.0186292588082314	0.0237609985057795	43														1	0.265784747174987	0.0889808804647208	0.137865388697732	63
0	0.221967589534348	0.0915822327792092	0.113826951833304	67														1	0.30101433420104	0.104574950856473	0.514013166896272	61
0	0.109365179933434	0.0259764217008672	0.0578228157430822	78														0	0.522033310778714	0.248051421790549	0.274956611972608	92
1	0.00988981767247321	0.00853461666120567	0.0142876377932131	60														0	0.297373380284986	0.145816257642778	0.0194124378809569	89
0	0.0694209000396869	0.0175834275397208	0.0166500814792953	70														0	0.553149915062112	0.256514488668469	0.357534749240544	89
0	0.0132566044313785	0.0116923577294408	0.0171181449316128	61														0	0.276202587936431	0.218373131409953	0.0171738798240469	94
0	0.269653525877836	0.0912939219152737	0.0324229072668745	77														0	-0.0434312323015951	0.0436839683364862	0.0553385976377116	44
1	0.520148298035653	0.413365519210396	0.120896384556771	91														0	0.419310216810417	0.225818366650544	0.290938816015096	82
0	0.086958641728564	0.0476820155364499	0.00199092122049902	75														0	0.0757841348137572	0.0185744271811947	0.0628327698269982	25
0	0.181864760735315	0.0937743605489072	0.051485110711626	80														0	-0.0447984094398536	0.0286068046280571	0.00599186511245799	40
0	0.239952386046693	0.0678730223017308	0.19638568868071	72														0	-0.0667771013057952	0.0104512592848746	0.00484684458870038	46
0	-0.137493112111875	0.00744752876520704	0.00305705984785071	23														0	0.153966624917271	0.0901905190931755	0.00959206298550509	86
0	-0.0334552447962315	0.0111074254309251	0.00655336351218499	49														0	0.432003704595233	0.126042363472089	0.0346912573563761	88
1	0.517365078616421	0.104477262346727	0.327420986477189	84														0	0.128048379271921	0.10737750130807	0.0168240533847051	87
1	0.517342871873189	0.0961492004710646	0.602919462118243	64														0	0.280872890755038	0.083545593620433	0.185674367541047	59
0	-0.0222062950849717	0.0254099150421659	0.0287183299165386	41														0	-0.123681564901763	0.00776715028977888	0.0082090639678339	35
0	0.0720643072735152	0.0415541343907887	0.00304270832582455	70														0	0.37024428764647	0.1265234108993	0.13713649791923	64
1	0.244013206116293	0.0659946622144339	0.0511214890879642	43														0	0.266228349826539	0.126783226746816	0.0139061531190717	88
0	0.39213739164679	0.140766997475503	0.849502585912574	72														0	0.107603386525239	0.0446601246637758	0.0115454766225892	55
0	0.00982670637327155	0.0134539081803353	0.231163351420895	34														0	-0.0169117443350694	0.0320172999903335	0.0110232175628395	57
0	-0.0197982070575196	0.017213375315485	0.122950950863988	38														0	0.256086249287284	0.084785983715226	0.161708685561795	57
0	0.2371585036815	0.138163339330929	0.0419936127152739	79														0	0.0473756141223668	0.0342070426724454	0.0283664424038781	33
0	0.308922971534549	0.211205231384321	0.0104617474613476	83														0	0.0185565744227085	0.0295061150890361	0.0263301023953389	34
0	0.133243100841745	0.06015959819622	0.00506825824321062	61														1	0.375731711827557	0.139055696442776	0.37709296163863	78
0	0.167893024367042	0.0824113915964239	0.00630188964366101	85														0	0.220682718218598	0.156638097531542	0.011745734285762	82
0	0.0469875364335382	0.0266605247472407	0.0417865951223709	56														0	0.372288612209694	0.188084486003944	0.16844306017175	86
0	0.0282862804645367	0.0317783982515446	0.00884537422081872	37														0	0.0386365409784613	0.0215210863792946	0.0994337868342144	37
0	0.0666213200226311	0.0655069381922241	0.024298100822487	63														0	0.431360444777838	0.267015951363561	0.288943038101912	86
0	0.248623587075908	0.0708297481555872	0.0158718204107087	96														0	0.289407884982778	0.132522717273075	0.0311873449371624	86
1	0.223863849227426	0.0944420024112968	0.0401272943793122	92														0	0.0740219818869909	0.097195450791272	0.0117428617345485	87
0	0.129049812160604	0.0661997237185344	0.0491724119700252	63														1	0.0360000611555716	0.0499912091773977	0.0305485810722621	48
0	0.181359008573872	0.0539748018926612	0.0406233815469153	66														0	0.213000254464587	0.188445299481989	0.0230108650182302	77
0	0.197772207035516	0.0827274715845542	0.0283598828077877	80														0	0.196752808482617	0.0602694134696132	0.179530509452808	43
0	0.184985935946216	0.0667292520587533	0.0825699960276297	61														0	0.0152211015020681	0.0217913743556211	0.0233444423683461	46
0	0.247299113960402	0.0909556933654554	0.0761144609002349	73														0	0.292822812907218	0.0916588900010011	0.0597660041183909	53
0	0.101762163186764	0.0366664963150245	0.00861071502445511	68														0	0.198552038057936	0.116384541779111	0.0164690008450714	62
0	0.148744831220105	0.0522723097902153	0.0701250578989687	81														1	0.291307964992879	0.182739829808438	0.0639464497095663	90
1	0.344154156970337	0.168572474456449	0.221775416685592	83														0	-0.383574950871305	0.00278848265028801	0.000688436989753175	0
0	0.0415447841006077	0.0243761784073875	0.0152794378166695	60														0	0.23206331277268	0.0971590841911483	0.0192256777577299	86
0	0.22062125379043	0.136516939678693	0.0035536504912155	90														0	0.00248121349034148	0.032321164891669	0.0310792567725484	35
1	0.681960625845315	0.213104059458973	0.1113317181041	92														0	-0.06423274614455	0.0142681362516883	0.0163952156248218	24
0	-0.00684650017740285	0.0276999257500719	0.0107397044586188	52														0	-0.148835110346192	0.00951648170551043	0.00889185963090063	15
0	0.263636345109715	0.135130305298235	0.258112913864504	67														0	0.33400971035112	0.176221592704933	0.046146453370475	93
0	0.191297422741219	0.105603020383176	0.0641488713202119	84														0	0.234675147385897	0.11865566991152	0.01046616047759	88
0	0.0531413421585879	0.0481578331981433	0.0485071982657376	52														0	0.33481964677821	0.133284102508113	0.0454045521385997	93
0	0.16606781090335	0.0847246636330801	0.0130940745637459	72														0	-0.119172718392989	0.0117262868427887	0.00169827374460261	49
0	0.258947956748852	0.115173491036127	0.0732592109161781	61														0	-0.071464858446035	0.020928919262473	0.0292573531475758	38
0	0.391724789272972	0.152256251533477	0.141388778669402	84														0	0.477648549874372	0.320463243074602	0.0654300582214809	100
1	0.481282541990271	0.15084381733841	0.0133462342520847	88														1	0.38408114141795	0.136210219742465	0.163518697392368	65
1	0.589960054639162	0.19205373985285	0.542371962057042	75														1	0.415618425493587	0.15985986621149	0.266335844580747	63
0	0.149632178161654	0.0749696473091859	0.0327983778923719	64														0	0.274016207181034	0.141641247631872	0.0524578070169035	88
1	0.482649364696455	0.309220158590573	5.52035089629303e-05	77														1	0.478386460200612	0.150314508679556	0.365400100785489	82
0	0.0630467736123771	0.0166688605516758	0.104463718458113	43														0	0.26984583027537	0.0853093131023938	0.476285322229151	50
0	0.221613974059931	0.0731539920245467	0.0843131252412772	63														0	0.0472884825547636	0.0408770764978314	0.00504285297945672	69
0	0.00154716408369567	0.0214575735217184	0.00168911347551102	48														0	0.391988419627068	0.179324553965487	0.42208905213093	91
0	0.175724629738887	0.0446229820393278	0.448330879574409	43														0	0.231338373248094	0.126856362133206	0.0216347277322191	81
0	0.13784618664699	0.0590952239175431	0.00881459341424368	66														0	0.137892425676069	0.0575313409574652	0.0225265195551857	55
0	0.331754858943713	0.111150904542725	0.140337465957816	67														0	0.235573845569615	0.0400848416094761	0.024923201541895	55
0	0.283253348559131	0.0273338125114682	0.670459730870922	53														0	0.324623277393114	0.138441639090614	0.13237003474352	75
0	-0.0203435979742683	0.0242759746189661	0.00642076261390866	42														0	0.373782141623055	0.203769444431816	0.15938734635906	71
0	0.266830510771905	0.0823465845736175	0.114511834488458	68														0	0.149547939116732	0.0904454920239594	0.0370594833766415	70
0	0.333770504518339	0.0805036365832388	0.0332574046206275	86														0	-0.112929558192547	0.0190925515158678	0.00567830402290439	41
0	0.226695972197406	0.0835032733265215	0.214606808561366	62														0	0.45072856638099	0.220230242636124	0.638793833077802	95
0	0.328730430243002	0.171967144250352	0.0597052790225557	81														0	0.269406685609235	0.161286359741045	0.0325356072168736	82
1	0.505171560904246	0.278107126647271	0.89996539020977	91														0	0.250325573180961	0.0684032215847522	0.402766911428567	55
0	0.569661665052565	0.0791977869155549	0.914735609483015	79														0	0.296659915225482	0.166756528964731	0.0578347985112817	85
0	0.34405558004084	0.130313361578148	0.0558065978570429	72														0	-0.248865591991054	0.00461862533367177	0.00319700253918607	10
0	0.325769918173116	0.123223529461464	0.0219551258423669	82														0	0.194245519816282	0.0811762767602241	0.0581019979484293	77
1	0.3916051333634	0.191478615167854	0.292306968403029	75														0	0.427546940677891	0.121949341133583	0.0321463874938161	86
0	0.036106652015207	0.0283091803890012	0.0251096708558254	51														0	0.0441526073914907	0.0237640854464522	0.0287536237627632	49
0	0.138778284023911	0.0655186538299411	0.00325621291088517	77														0	0.172968819333971	0.057101898304303	0.0365692922147531	69
0	0.116406167957671	0.0435652296626185	0.0576561713631931	58														0	-0.00297739214796211	0.0201157396117568	0.0500282478213959	42
0	0.146002206115219	0.0464253595837623	0.0062311488305018	61														0	0.151462580715791	0.0968786696261226	0.0110756055608297	68
0	0.231109326768236	0.0673377683137758	0.048390607356124	57														0	0.365954659314568	0.26907006558736	0.205129240436692	91
0	-0.0891678393784461	0.00987519204137723	0.0216965440461866	36														0	0.326050758533122	0.149519411949964	0.116153579573283	57
0	0.247702259814418	0.146491055675038	0.0465439671469772	84														0	0.20316888883067	0.105653991524344	0.0120322928692917	85
0	0.356645507835257	0.137440515504179	0.12513671703186	73														1	0.479054394808583	0.248415420811042	0.711717798300905	85
1	0.486870821989167	0.162074178105259	0.244536740602172	55														0	0.11159497545507	0.0655696533640108	0.0289683693460827	64
0	0.152412754417882	0.0728247666037148	0.0185529197992565	57														0	-0.314414053873291	0.00256969695022302	0.00125144092751326	0
0	0.242712035008687	0.116922186393523	0.0149621286963012	89														0	0.171096324214094	0.103256588290451	0.0168178476606978	85
1	0.392615179681199	0.246433159576579	0.430693337296665	80														0	0.396827982232837	0.181983567289302	0.103135729355396	86
0	0.367163721865606	0.189344345748662	0.13771543660779	83														0	0.459618441481675	0.110022697537212	0.17056878351996	88
0	-0.047623360066469	0.0115053177869879	0.0130713373320402	37														0	0.413309666821778	0.17048895414101	0.203042776178034	84
0	0.386964447113376	0.16938361235119	0.485928987202226	75														0	0.372827063042253	0.220580717614861	0.122198455137055	58
0	0.385751295409492	0.120851276212303	0.0916395839119354	96														0	0.247209735199922	0.201362580552897	0.0149433872182117	92
0	0.431630118219819	0.122857943324238	0.21149007601617	82														0	0.306950215712574	0.178453269859374	0.204421697089607	90
1	0.167591306318245	0.129560183310889	0.00952710207544586	80														0	0.11061622411153	0.0420639060190715	0.0531640574140007	47
0	0.248977346300412	0.118251853485547	0.050206412992946	83														0	-0.0736704819740608	0.0137323769864648	0.0213743183172101	31
0	0.267477140990544	0.0760200941039412	0.0537972806531218	68														1	0.139339709810107	0.0285229751220128	0.0172365956589765	63
0	0.193904686286281	0.0819744393641646	0.0810370821510869	58														0	0.36175208555317	0.118814123607545	0.0349427304193934	90
0	0.080463194282741	0.0443371555308952	0.016340615650975	52														0	0.186639397164561	0.0664994654421531	0.10317156533928	56
0	0.193585029658412	0.112673294175872	0.0154652607537246	71														0	-0.0915047390392471	0.011423796210779	0.00782171223832063	42
1	0.330640305450299	0.249029970990224	0.0258401501666138	90														0	0.338452654403956	0.104772652123764	0.346003044538412	70
0	0.107984855008858	0.0170885544305264	0.431022176432276	37														0	-0.1718396283501	0.00630701217900789	0.0127583787040114	6
0	0.2201784345534	0.0578258961816555	0.0936513749977722	64														0	-0.256291712103789	0.00422967735718456	0.0104899333414369	8
0	0.101747608445757	0.0467211465865739	0.059285835710094	48														0	0.0730316057740647	0.0408744833301536	0.0110053996632723	47
0	0.194529539471417	0.0707716906107387	0.0635004578577554	66														1	0.476874999527951	0.324489353161158	0.159830539696302	94
0	0.00796940618524823	0.0251821407355135	0.0151206182854742	49														0	-0.0288014590744587	0.0212598206767763	0.0344784864150301	33
0	0.169015142418586	0.0727696813310083	0.0573465022212585	76														0	0.393435017746015	0.162479119181175	0.129705358539	85
0	0.506936420638189	0.173640759022285	0.684387068182412	78														0	0.0756425910235589	0.0444544356504504	0.0204154869776506	46
1	0.376305510758488	0.289580851584265	0.135043307402351	94														0	0.384153465684091	0.0958531330371102	0.0179139912863653	86
0	0.260489677162199	0.107872914358492	0.151776010995494	75														0	0.283721523966408	0.186543660953106	0.0673354226959381	84
0	0.197967973593488	0.103805081393466	0.011843101808645	79														0	0.299738358002438	0.0433118688577117	0.492965895068095	43
0	0.119505720988517	0.0768941714315826	0.0105474788987752	61														0	0.156858365363421	0.0463614585537625	0.1344683747574	32
0	0.336373943831192	0.129046043146746	0.0263050297364303	95														1	0.519113194917399	0.224402698147928	0.799662438719849	86
0	-0.0383557240459485	0.0228095203749426	0.00382270136256927	46														0	0.2545906738998	0.116680397514725	0.0363862433222452	99
1	0.312426248233332	0.0641715385386233	0.592557738286317	64														0	0.140671373695641	0.0468596893442232	0.0692751012615259	64
0	0.322834336396526	0.188818407048801	0.0498013054779597	89														0	0.22986597438536	0.0867272549321299	0.0272881229263674	56
1	0.254837978720745	0.0457147070844136	0.696292990555323	59														0	0.225888065517162	0.100054115702961	0.011448178873274	89
0	0.0932043034637438	0.0644867947576031	0.0209688816209643	55														0	-0.124319472483673	0.00915506318744981	0.0398326361903509	21
0	0.32051056197663	0.0986864185722426	0.0625064036861832	69														0	-0.191667851963213	0.0080828181858212	0.00791664845383841	12
0	0.255558401548352	0.0817479096753213	0.0204591678918944	61														0	-0.152014712380059	0.00733394145811487	0.0133626326200719	10
1	0.775745639144535	0.183596049148071	0.44949798365699	76														1	0.301500950905228	0.11838530885443	0.028657403466963	84
0	0.170247738876272	0.0623113060154889	0.0316633202095734	78														0	0.218523313145335	0.0960915608135175	0.012275160302673	83
1	0.403414991555326	0.118950988455119	0.0827278555397655	70														0	0.295027619139947	0.156263449004632	0.0808084944818253	89
0	0.173811784062328	0.106738125899209	0.00543171996903501	75														0	0.206562762419154	0.0543950789487508	0.359636123529887	41
0	0.214212433081704	0.131639905962164	0.045879485238666	70														0	-0.0771041468116667	0.0129456220479448	0.0159114692100576	22
0	0.0712162367210013	0.046259126272143	0.0293616679548779	38														0	-0.210223690365065	0.00470769160777069	0.0116641155440763	0
0	0.302155093015553	0.142107303754487	0.153436564442959	84														0	-0.249897680065615	0.00470769160777069	0.00895071341100087	0
0	0.0512459997317432	0.031705225798075	0.015967729432322	55														0	0.176823542145831	0.0736096889464236	0.0507159652865	53
0	0.0855908662886247	0.0607072830868861	0.0104753384051939	49														1	0.534421154394037	0.292966617346705	0.384428762813232	84
0	0.193127852646365	0.0400265839457601	0.205690280284826	65														0	0.253719900900155	0.105601527825243	0.0441909387828176	79
0	0.153480620534836	0.0390451952815357	0.00441840674194553	59														1	0.546869105430836	0.261638090595403	0.124211423858229	74
0	0.118759687652366	0.0136573437919249	0.00820510409304144	46														0	0.192375025003815	0.0871127944212923	0.0116627606027928	81
1	0.0831853882435381	0.0700459264791848	0.025849616690472	55														0	0.251182686182437	0.0989969929098974	0.0345738124264894	91
0	0.18713084280912	0.100557459188056	0.0491700789736645	56														0	0.188983183774218	0.0879345979766424	0.0335149366490827	63
0	0.0468653688343788	0.0232801496137944	0.0990816908410395	47														0	0.380287032871254	0.0904949073798628	0.291271476143953	46
0	-0.125409736541482	0.00732489266249002	0.00176690053051417	24														0	0.194685561027355	0.115359182144185	0.0608621354097989	66
0	0.190810603365698	0.09584813847049	0.0494997957505657	70														0	0.20555407094815	0.0768944072279227	0.248065557245734	53
0	0.255079507623365	0.104563216498925	0.0468302863513706	75														0	0.368980288469878	0.44609580197838	0.0069586457653853	91
0	-0.0198699392800254	0.0260298789802185	0.0197758472271254	46														0	0.275064711686472	0.107251332701619	0.0228216404507991	33
0	-0.0410162439495108	0.019937950100811	0.00206106362361031	48														0	0.3796237119059	0.228943842843394	0.0990357072696163	86
0	0.0298244853902018	0.0329929084207691	0.0126164765465404	58														0	0.0972141896631598	0.0689728840123855	0.0156740073390588	78
0	0.219768557974856	0.0393614002218712	0.0758748021095932	61														0	0.191911222840778	0.0797219214947491	0.0384281845343278	81
1	0.100840871872837	0.0385468262185173	0.0177395843324988	58														0	0.197225302755932	0.100213978538259	0.0660886531905684	61
0	0.0875884263193435	0.0389839079873984	0.149879315180513	39														0	-0.097128565488537	0.013107623220862	0.00372730087663669	37
0	-0.00277851716393628	0.027423113425764	0.0620792351989629	43														0	-0.0328443095796874	0.0205132978939843	0.0373965211865304	34
1	0.339381285298168	0.141434031358965	0.00989427016611344	77														0	0.269189101261049	0.155404720617593	0.0271758548093704	81
0	0.331208061871319	0.13631624367161	0.162181431341254	89														0	0.0629176458615644	0.0348571974589349	0.0416197141640463	43
0	0.327321414650948	0.0982982805245599	0.113472580033232	85														0	-0.152685276833917	0.00685232934773679	0.00689499581845443	19
0	-0.0168015251923844	0.0310575155544954	0.00733043549679388	39														1	0.246760049047777	0.0923267974721204	0.04564139989727	78
0	0.136223458020725	0.0555475968991988	0.0593687099054649	53														0	0.0888169949125878	0.053225222563812	0.0213347763478819	58
1	0.173250556519805	0.095279099909642	0.0831098902960868	69														0	-0.0414838837853633	0.0186656960842954	0.0279826591513995	28
0	0.0799968134525179	0.0394421310834323	0.00768334003700569	55														1	0.240926581005562	0.0755227033934134	0.0241412989463846	53
0	0.257870096268463	0.0665016011969772	0.324767196838776	58														1	0.190540878355234	0.10098897889458	0.0156562646788991	75
0	0.198212841749669	0.0563223852864457	0.0144158968669628	82														0	0.067272557549532	0.0113275861787149	0.0113476822746295	39
0	0.12068251891771	0.0249802317706313	0.0574854807647056	69														0	-0.16526637460141	0.0132297667490491	0.00892521776117939	25
0	0.000100007296016316	0.0183579631965932	0.0047605605983611	51														0	0.219314940022753	0.114787498949224	0.0133783524226864	85
0	0.177492063265912	0.082011643024764	0.0850466682199408	67														1	0.402394611983335	0.166328800706546	0.0846645541904469	81
0	0.0208762796184858	0.0212732981783732	0.0304302299428475	61														1	0.499465839492028	0.120649078274631	0.0491214464424193	59
0	-0.00910125875446448	0.0386156328832414	0.00609484824644293	45														0	0.245673061489908	0.15116229088078	0.0653410265481893	81
0	0.0714377187966433	0.0386963587782593	0.0463549737851097	59														0	0.290691932640996	0.242159818047133	0.0214799283178484	77
0	0.141635427152638	0.0789314032572703	0.00812971946161623	63														0	-0.200494077818402	0.00542155290144756	0.00817423169509712	23
0	-0.0927301271915851	0.013533991057839	0.00142882084421518	40														0	-0.055343335986389	0.0159353831943647	0.00926804809588412	37
0	0.317831316303313	0.276224548416439	0.133719791911342	79														0	-0.0940830423627003	0.0159323339371684	0.00847102394451572	26
0	0.205740664601754	0.0907353643759319	0.0822623589358638	63														0	0.456328180812756	0.198734270348626	0.136802509644714	89
0	0.118295020038742	0.0716477969216968	0.0254646663952131	64														1	0.449655367123322	0.511455318191423	0.092664890284266	89
1	0.392467109926562	0.207160473797572	0.370470728275951	93														0	0.118516470494496	0.161129926293051	0.00521166712235115	87
1	0.140961860482728	0.13243794228358	0.0538373045507885	68														0	0.0887203984017523	0.0331009560328484	0.0595301725479552	40
0	0.470668520986546	0.335406978914692	0.200511133374233	84														0	0.264155816087355	0.176702602469591	0.0358864977060923	77
0	0.277092421264108	0.0859590269184893	0.102953347934334	69														0	-0.107543667424416	0.00810054019693677	0.00640667334271156	45
0	0.243915360716374	0.0710255315769468	0.413333720329475	46														1	0.414993572688268	0.139589751611054	0.0312882229313823	86
0	0.118358891578563	0.0704847967377562	0.0358444147636883	60														0	-0.217560384665267	0.0149826884537534	0.0014729734980492	30
1	0.285974728185001	0.205524717640016	0.0702711981654315	83														0	0.395392704504169	0.0658605424336333	0.553480287935152	57
0	0.341673171025076	0.164533602335377	0.384393328789669	74														0	0.182372240725129	0.116885384628157	0.0136258367523429	74
0	0.131714055399454	0.0862248168163535	0.122905290450577	55														0	0.294317275715429	0.061587599818237	0.383719840182802	40
0	0.133094177437821	0.0747612185803392	0.0207685355468748	69														0	-0.289181947874016	0.00494720626195289	0.00210821434117908	4
0	-0.0782708222886731	0.00884964376391421	0.0718635328607183	1														0	0.261889018726823	0.080380559781483	0.0158846939710043	88
0	0.176275135315535	0.0858995886505136	0.067398393996792	72														0	-0.0903319160373914	0.011488415053913	0.0321666058022215	13
0	0.265991488415491	0.200993546079337	0.0100453935207779	74														0	0.20334293027173	0.0503194485892519	0.231866432044913	32
1	0.120711047324406	0.045099045996463	0.0388841994764622	75														1	0.451848162251384	0.174397064801132	0.65355091159492	77
0	0.178262581184173	0.0745394524206121	0.00634495615697084	88														0	0.536156340070504	0.201947123679889	0.0253542447219213	33
1	0.733999678694336	0.378656370322665	0.966702232510496	88														0	0.348158227319533	0.258766310224383	0.0657498836862621	92
1	0.167906575042801	0.0699852288060043	0.0790569357154322	64														1	0.353411774445771	0.185791211809243	0.0659665756403934	96
1	0.449609689133182	0.140281169306348	0.953666568266683	65														0	-0.0382766448140414	0.0164816927757019	0.025505727506494	28
1	0.167905587852932	0.0699852288060043	0.0790569357154322	64														0	0.340855706707531	0.194839998118156	0.0232438963992899	97
0	0.0564774792461314	0.0233575208358879	0.0515317634700806	43														0	0.334619866887364	0.0926556248513527	0.606262212262539	63
1	0.350515849238927	0.225375504420928	0.312679947771526	88														0	0.347948772314378	0.148199804110571	0.148829310876239	82
0	0.375271065167104	0.169968405652079	0.171450805831637	84														0	0.0812313577363978	0.0298168759897387	0.0395687400923642	44
0	0.435411626952813	0.246380947632449	0.383187695916788	92														0	0.370349363995661	0.124462956794486	0.386958963626504	65
0	0.246148408009466	0.127824580749066	0.117658800209378	89														0	0.0473973961292741	0.0519766238443556	0.00739202144635662	50
1	0.335262102854097	0.16126434081342	0.0233746748861065	83														0	0.176809546109499	0.0778783689408199	0.0213483073449749	69
1	0.588164991744056	0.184064470170889	0.651345837659758	75														0	-0.0865598474471076	0.0208718982300823	0.0061706317409987	28
0	0.0811587806977364	0.0433738503275796	0.00336458660010133	49														0	0.39941504400318	0.1239713344993	0.40513451293011	80
0	0.316650698040414	0.097390659709945	0.240487286926568	81														0	-0.00594186800939187	0.0343234242103094	0.0107966681198157	44
0	0.529387545084121	0.17374485023192	0.907931835473645	77														0	-0.0278216098529626	0.0223158909214523	0.013146574462091	30
0	0.168989072609913	0.0561016248394692	0.00896350597545564	94														0	0.13283556489383	0.0471606200292518	0.0503217650670975	45
0	0.232454770177924	0.122958599402675	0.0385265285444568	80														0	0.110479857057939	0.053459364425989	0.0623524327921747	43
0	0.192208035479844	0.0481172795964728	0.0730442832558714	73														0	0.237807005470094	0.0627750892792718	0.429750032033432	55
0	0.0190055646574924	0.0328578840783676	0.000878592910230464	64														0	0.314214329718323	0.183536128936025	0.0243700814029113	93
0	0.031919251733568	0.0187554192248785	0.196665019295668	47														1	0.372813076142864	0.131763285010302	0.202734601236451	68
0	0.307358306235878	0.0879494671646436	0.046841577143634	72														0	-0.0714868267324553	0.0191609112600055	0.0131857620655234	30
1	0.290127547631606	0.130953603069482	0.337378181440818	73														0	0.390366513041898	0.304320253533586	0.0937986295656145	88
0	0.198752992376512	0.0773173361308667	0.0143267016239438	62														0	-0.0817940322414453	0.0327905647038121	0.00511681775780445	42
0	0.36877754674771	0.145008331061957	0.0380244436781237	96														0	0.0745371998730236	0.0332347837270655	0.0176770224788648	56
0	0.257771669693369	0.0987751722153315	0.0711246939343235	89														0	-0.152354302653352	0.00930043419882557	0.00660893088636352	33
0	0.197117249243974	0.0942584750582626	0.0149691739922652	87														1	0.489676122234976	0.266594131701078	0.4964064660945	87
0	0.277407083284062	0.134529348986454	0.0256103941837451	76														1	0.452956171768179	0.270056883063268	0.139626183389769	89
1	0.242053232464172	0.0915444278676557	0.0907856272790351	84														0	0.246606272392933	0.122745590347372	0.0654306375848955	64
1	0.387783499286555	0.191229998471695	0.12056931677401	88														0	0.433594610947766	0.126611770968281	0.365512994055488	85
0	0.212111408217137	0.0667390570601858	0.0144034405049793	96														0	0.00130991053534985	0.0239271222673848	0.0435895986317989	28
0	0.103025482593198	0.0587884626999445	0.0274426701823142	57														0	-0.0969666960879633	0.0163778983843582	0.0076189517657348	27
0	0.311941922574167	0.119127728252226	0.0256102221043028	89														1	0.226296916222719	0.134544631380032	0.0211295812810094	84
0	0.332959192524179	0.158260827129337	0.0388620438098189	87														0	-0.102424686251099	0.0125379848278462	0.0171091878721816	10
0	0.0526075416436216	0.0415783238295179	0.00115505693566191	59														0	0.218412665761642	0.159912083397957	0.00815666394538088	69
0	0.143585590456914	0.0483975977936405	0.000758992093951414	63														0	0.373531167949607	0.184623222559049	0.0821464047414877	92
0	0.425591186374009	0.17664775695159	0.221739174676183	76														0	-0.22929910953591	0.00740373147328203	0.00909601369180677	10
0	0.106059987192475	0.0396941353365128	0.00784696978768809	48														0	0.00682645432726328	0.024099304085645	0.0130536112200249	50
0	0.351278643027921	0.0797682084541067	0.673685134789475	66														0	0.0468643067728071	0.0332075308616854	0.013781870517416	49
1	0.553904170607324	0.232787378876227	0.315107113193763	79														0	0.310965023919937	0.137186409603194	0.0649186652565862	77
0	0.212681913901171	0.120348003145715	0.0898302030329026	76														0	-0.104632131597808	0.0139348500695109	0.010132122369873	38
0	0.300323594127109	0.0911647658081613	0.458262372393512	79														0	0.29703186200985	0.0443558504312692	0.89394313656811	40
0	0.0294404409363478	0.0377605793247266	0.00287527368286682	56														0	0.163881751487611	0.0671130010260186	0.123301377990679	70
0	0.159202247890827	0.0382992472075991	0.0222171104785543	70														0	0.144881131800036	0.0882612411039677	0.0594039013642987	59
0	0.263402912867631	0.0763873252053344	0.0143650211577231	90														0	0.356291592320358	0.270210626952567	0.07408703383082	93
0	0.129116517553207	0.0675139376683737	0.00295502161608537	72														0	0.241626668023906	0.0884994404688372	0.131882807424077	43
0	0.25972699754695	0.0902932767486316	0.35702273177219	75														0	0.282216505489544	0.112317389348705	0.0779742201804997	86
0	0.251664251813294	0.0703678646997683	0.00991178181312913	79														1	0.680159975682752	0.320351421274947	0.695955134635009	89
0	-0.00436976335320265	0.021401029451484	0.0232817163233945	46														0	-0.027794948795336	0.0269227370266029	0.0209782489344288	37
0	0.269716884956292	0.123034559005283	0.0742910137415273	85														0	0.273850990687259	0.0894868367927279	0.108020242089917	66
0	0.230957610289994	0.0415222286882148	0.0286217250954902	78														0	0.222194415098028	0.0931942697432016	0.0352340382951942	42
0	0.235606385854392	0.117618485453118	0.0337455086481293	83														0	-0.0804082994733402	0.0126261131780711	0.0157895711882565	22
0	0.22081843281139	0.108599453395383	0.0105714569695664	83														0	0.209132051646329	0.0853663112278918	0.0986567470966207	49
1	0.180193786998776	0.0848674828264642	0.0125779793017175	75														0	0.29754623700303	0.0975986673992635	0.212027889489245	45
0	0.187208572866246	0.0820027923880225	0.0696317446412086	78														0	0.438751828020108	0.138388373235155	0.427388658945927	63
0	-0.0360158881773281	0.0118818789718014	0.00158789018912568	35														0	0.196646440676685	0.0979382972259315	0.0425101015668157	61
1	0.645252580668661	0.186141874214167	0.973410265322205	63														1	0.683595739524466	0.299826151695503	0.914903731579335	68
0	0.114233736661009	0.0377605793247266	0.0073792993945482	56														0	0.117271923737684	0.0398795933414623	0.0321878873951748	54
0	-0.0621000691713495	0.0128348289600665	0.00117309034044482	47														0	0.0506670231785474	0.0191210421953273	0.0553971921801047	32
0	0.27263952210378	0.140439694868076	0.0424281005807739	89														1	0.308984309516916	0.0749668029652382	0.355977997726706	50
0	0.130044977780525	0.0892017619388472	0.0445091706147782	63														1	0.307055894472987	0.0691499898609334	0.027563278570773	69
1	0.0823092378716942	0.0528046102651451	0.0959080702119556	45														0	-0.101980986520175	0.0138223476986484	0.0179990904224784	32
0	-0.121151945074396	0.00669556407035388	0.005434473992712	41														0	0.223930395881238	0.0863561786772476	0.0454968836360894	86
0	0.0600472638734667	0.0503187710984777	0.0151669903183368	62														0	0.333337227201023	0.112096482371543	0.0372856867409942	83
1	0.368521526312429	0.305111888459174	0.0742980975536112	93														0	0.0933810907227234	0.0527867153837905	0.0144778645534261	44
0	0.0682735215525601	0.0455258234191777	0.0654431937989829	51														0	0.101708916710547	0.0230203030884012	0.235683324313527	35
0	0.168594378052564	0.0714864867267823	0.0231605724419123	71														0	0.208655272844133	0.061267520311327	0.199060308683968	34
0	-0.162806315957433	0.0118528874186967	0.000409489011233975	29														0	0.335497456865323	0.14062167041435	0.0670696052045209	87
0	0.106238439430478	0.0456317068224242	0.0162311309779365	69														1	0.572228892487037	0.305601035140204	0.855422715080397	93
0	0.280962872748814	0.118362256380815	0.0291784594027124	62														0	0.312136206167131	0.0984632568217936	0.547357832897709	46
1	0.744640137743209	0.380694817416312	0.595064297261786	88														0	0.48911676590173	0.169451417252691	0.535129876947142	82
0	-0.0997114032385936	0.0149438416919661	0.0214785716151187	35														0	0.264720708477257	0.0868504671678571	0.0778931268165273	79
0	0.214442590647536	0.108138908375439	0.013456782003977	62														0	0.337937799971427	0.16548618699309	0.0894013023561938	86
0	0.235684681998595	0.0740823155599095	0.0148404226641876	78														1	0.382420274415552	0.269106566302503	0.0997297815893106	88
0	0.169872717436854	0.0557167730495394	0.0724113767072164	81														0	0.256142930644376	0.12286825032006	0.0160415203581264	92
1	0.46953739785544	0.165411153484777	0.637274949398684	83														0	0.256544281177777	0.11808242988701	0.014704813489987	90
1	0.196025065386602	0.107057599258412	0.0384710036370612	77														0	-0.0834052179980658	0.0107843733292575	0.00731852552007388	43
0	-0.0267299275274958	0.020628812507429	0.0130730015981707	49														0	0.292123555226578	0.100914709431164	0.272140113689338	67
0	0.0947769256593929	0.039330092769339	0.0114433721995075	65														0	0.404401461786098	0.218030346379465	0.116819259938396	80
1	0.686404126381803	0.323731633859036	0.992560181299816	89														1	0.201193970163798	0.0615305262708969	0.0724139736473626	57
0	0.214442590647536	0.108138908375439	0.013456782003977	62														0	-0.0308685407416094	0.0172564561072699	0.0381852679290871	29
0	0.105838143762203	0.059967680146191	0.007648408254666	63														0	0.333559468254451	0.189414418275713	0.0972593323834904	85
1	0.232435530772071	0.10292039848661	0.138600593263819	77														0	-0.0238129349029471	0.016931056392318	0.0288466757756693	35
0	0.220783877890491	0.0892565255667759	0.159395755554436	64														0	0.240060251188462	0.2591889288181	0.0181052037325285	90
1	0.431375755985822	0.090928672966986	0.0281189871707274	74														0	0.328287376296888	0.103061421026531	0.0222965392850024	79
0	0.311912439315598	0.0630975961867132	0.537638931209567	63														0	0.356887839093581	0.121768216521478	0.0276627537968195	77
1	0.242818623847349	0.119152436112461	0.0708191520040781	76														0	0.241464380353856	0.053851646023296	0.0298927415869723	80
0	0.286081824826592	0.0992680629011573	0.118179494657146	69														0	-0.177970787610681	0.00463432672866312	0.0277843125679422	10
0	0.17510544484766	0.0736718064439425	0.0122755180649007	78														0	-0.156249879892315	0.00716121636820173	0.00170886043546901	22
0	0.120736519800563	0.0449981297504063	0.0336116864526541	67														0	-0.0890938823215534	0.0128527572060562	0.0115633212595896	36
0	0.280057830620026	0.136045121914215	0.14338749819355	68														0	0.281072300363894	0.0916984151454126	0.413556452893331	51
0	0.350027188793291	0.198328850771378	0.311346046549293	72														0	0.206377100174691	0.04165955769509	0.387583739224916	33
0	0.248665748001602	0.17878413726235	0.132843362639196	85														0	0.414198267971056	0.062424965882746	0.25277809858831	58
0	0.0606227526353113	0.0392581617502455	0.00675784853967212	57														0	0.137592434682521	0.0683637170566812	0.0262487308250959	60
0	0.44977180285552	0.146622035795697	0.233708879060304	94														0	-0.0554976024974709	0.0107717766244587	0.0108409662193209	45
0	0.0253206538793319	0.0338691320213239	0.00711966894249888	55														1	0.357807375612642	0.260551886485627	0.0937241091521762	99
0	-0.0104152486717008	0.0235627858855959	0.0218006240044821	48														0	-0.0110428990790051	0.0187889172270396	0.109750200285654	27
1	0.349119441372187	0.223625462046478	0.247532500568543	78														0	0.143714188431497	0.106077577916315	0.0561050743892965	59
0	0.13872570485971	0.155946423995631	2.86433129758786e-52	73														0	0.24207837465091	0.104556685455922	0.0133874342112701	78
0	-0.166401123483006	0.00511536765732369	0.000632499191228748	29														0	0.132951622358359	0.0803070873758835	0.0462022817373218	64
0	0.0691831287591038	0.0444770425519963	0.0238559171393569	57														0	0.203529218318609	0.0451523647840866	0.478480455055233	39
0	0.290019952222896	0.165338297413646	0.00669200058014206	92														1	0.34700073344353	0.209601238339896	0.0282683312765545	89
0	0.0146017829260682	0.0533590005920762	0.00618945224621118	56														0	0.112964935339745	0.0629843277867373	0.0609260233332361	56
0	0.209051048849039	0.100744539648943	0.059730041816723	84														0	-0.113796629276463	0.0110262356489053	0.0198853565695605	29
0	0.0560182914177818	0.0371025391034865	0.0151301372130103	54														0	0.283585038374211	0.113565393205678	0.0848266623010645	37
1	0.452109210504023	0.0743452353165811	0.107923443671835	92														0	0.326454172802781	0.0415763796207052	0.673093083886881	44
0	0.157362123084858	0.0859440502256162	0.0593299101630093	61														0	-0.0534345445214583	0.018533570380356	0.033250784486294	27
0	0.107092272013352	0.0613843714031897	0.0172076988338925	50														0	0.0420828635071633	0.0278422179650089	0.0272034733463983	50
0	0.236954391237439	0.0705979876741043	0.0241909380083529	83														0	-0.146745222918796	0.00892903368113632	0.0161148384913216	17
0	0.252809675344115	0.106507755770724	0.00582644407275875	78														0	0.31191812636573	0.0803614062713513	0.398323573192569	61
0	0.232280639939391	0.101402042363087	0.0387647846840909	85														1	0.223722765402329	0.143912632704658	0.0192117131687575	78
1	0.384589609974968	0.177341957771533	0.251812691899808	89														0	0.334747911376495	0.0993885271886883	0.0466030874459578	85
0	-0.00703280694171856	0.0350407130127291	0.0108393050473303	52														0	-0.200496337453539	0.00504317198816745	0.00533215393341319	28
0	0.165958535498235	0.0587406308233498	0.167166987800819	46														0	0.000174277311214509	0.0175257383434105	0.013165048111517	47
0	0.095565055482306	0.0582299526508493	0.00331784342988493	70														0	0.0950350187467195	0.0590468326871199	0.0124499355038452	58
0	0.0932672290505249	0.0712813206929673	0.00777935623754803	66														0	0.176935641723194	0.104227780874393	0.00667188641390503	54
1	0.650642305321764	0.166258334818551	0.646840360092235	76														1	0.475912415244221	0.211739669644854	0.502908932629123	86
0	0.0381150083618508	0.0489446561079274	0.0121065885034033	53														0	0.581798062541007	0.0790102994355796	0.975971725308801	68
0	0.383452490128731	0.254395435110657	0.00704405126032189	84														0	0.0295630884919783	0.0443698930155003	0.0356173588194927	43
0	0.0987538794174305	0.0667979958345216	0.10763264212845	63														1	0.33238477418962	0.149209904426002	0.054883097745619	89
0	0.224116887518479	0.142501011631953	0.0058559847004009	88														0	0.119058707978679	0.028304376872963	0.0688673249919452	38
0	0.0226602932831284	0.0232745451849924	0.00310358826782004	57														0	0.1584297994373	0.0656839441511763	0.0524255126305763	53
0	0.297392449037037	0.164492172568948	0.104665118039446	73														0	0.0177071153373216	0.0373862267567147	0.0076190543750563	49
0	0.200971232813316	0.071767202487512	0.127882206926585	64														0	0.310271507889813	0.114599191066889	0.176157822241933	76
0	0.143924512160558	0.025915932335336	0.25382655064256	35														0	0.34973971824069	0.153835239437354	0.0828496187403451	71
0	0.252384003471714	0.109974734794415	0.238751749750407	68														0	0.302632329701167	0.186641910339783	0.0388533079869435	71
0	0.183669581918852	0.0439504567424541	0.0564009768716221	71														0	-0.0199307987653933	0.0199193314130978	0.0181733273284632	32
0	0.0212515812411069	0.0303446630490022	0.0409452279611451	43														0	-0.363264409820615	0.00297519221122293	0.00665592411129128	1
0	0.423739133667949	0.180764288741185	0.861659254404061	76														0	-0.208992138777611	0.00519630736532562	0.0120226183343815	2
1	0.173011856251681	0.0930026081381789	0.0482960645250023	67														0	0.240832886796418	0.0938292235476452	0.0211887528351988	78
0	0.16750977041792	0.0748422751016876	0.0784491786586152	66														0	0.161879574894342	0.0944023690508017	0.0119910052093022	85
0	0.441307178457213	0.12387376274919	0.178982287733477	60														1	0.137038336099333	0.045606451671464	0.0434380968873745	48
0	0.0188428977498146	0.0225931842848376	0.0382585378611453	43														0	0.150173591688345	0.102515646345111	0.0213960414322537	71
0	-0.00501375143744358	0.039639361294265	0.00263261402068609	59														0	0.346121230674507	0.140101731738218	0.0381041960048768	91
1	0.27420581347432	0.176535152205903	0.0875246249760263	83														0	-0.110179275731242	0.0184669326554882	0.00888781618046778	28
0	0.125949896225191	0.0501178786372586	0.0484540562158627	64														0	0.133305669307487	0.0573736430249763	0.0201864854138702	57
0	0.227871314793864	0.0288305548524525	0.915041777205483	50														0	-0.169411694414244	0.0055945596705136	0.014898563652732	23
0	0.195222756780475	0.0589352101239096	0.107845669315398	66														0	0.264250687095297	0.119960904544333	0.0284418596770873	92
0	0.149147081895331	0.11710720625547	0.00344194075193725	62														0	0.129065075730646	0.0338333898804034	0.166401103205434	38
0	0.555320500782827	0.280726619751453	0.0586628941929085	95														0	0.010177946570046	0.025819826178508	0.0492424805574947	26
0	0.345190083385134	0.157250130724095	0.530290383469229	73														0	-0.00176789405337666	0.0237549578359533	0.0340571589235711	23
0	-0.0292370050590792	0.011136561160462	0.012842369435142	43														0	-0.0325554442074366	0.0242533018203081	0.00559732946308816	41
0	0.191602698832575	0.0583942534419722	0.0462187002220076	57														0	-0.207417893078357	0.00976871613802081	0.00149632822209017	28
0	0.0910572515556172	0.0752732032251349	0.0165801015145467	52														0	-0.219230380706889	0.00560810900059597	0.00538741434660051	16
0	-0.178109696257235	0.00698307656681023	0.0155991014702462	23														0	0.433621819000123	0.152512153790773	0.138429235819626	65
0	-0.099666704380687	0.00966474848207402	0.00139543326940635	33														0	-0.385711722256311	0.00202229635428005	0.0011165746497704	0
0	0.162116895977496	0.0456977959027323	0.0503904170001149	54														0	0.310469438983602	0.028105441532436	0.0951678899093999	38
0	0.083036671001008	0.0453689089554253	0.0288385437220925	52														0	-0.110042387597301	0.012070634832889	0.00728798773984625	18
0	0.0972787678107482	0.0569580504329469	0.0239393794549625	59														0	0.106836448521846	0.0364234753682459	0.102010775489773	38
0	-0.0712055791739871	0.0176419576651429	0.00290506853626619	46														0	0.125687491239978	0.0673063399804304	0.0187138657632054	61
0	-0.166630781226307	0.00564551582922545	0.00226636318812008	29														0	0.235091237360671	0.148946899552342	0.0101767542150082	92
0	0.0608427368654653	0.04054735863453	0.00234287717542783	64														0	-0.0742812873840195	0.0172904650959599	0.0129569178039854	29
0	0.0429974781258653	0.0263984475571527	0.00727528858036887	60														0	0.0065995820923734	0.0219924194912373	0.0553472593653207	38
0	0.122218923808766	0.0659933640033215	0.0239908391579167	60														0	-0.0272375373425492	0.0287950102829169	0.0112309069427069	44
0	0.31738073103219	0.0558039981645082	0.187746487517846	72														0	-0.102981684548418	0.0135437149589084	0.00460882380677709	40
1	0.388589135330751	0.163289440820579	0.101405200405181	92														0	0.171225030569936	0.0649074002664917	0.0564643978693377	39
0	0.263233580037255	0.0922722304352695	0.714917610850914	64														0	0.188268074668566	0.116327265041113	0.0122597305114501	81
0	0.438448653221427	0.093036972468748	0.694766798182788	67														0	-0.0308744597957708	0.0274123439227753	0.00983723166378797	41
0	0.193187193202757	0.0757280805748742	0.1734603399255	77														0	0.0906949565487172	0.0546810123439102	0.0102347950304842	71
0	-0.0063702789611028	0.0285768928849226	0.00369356442174559	51														0	-0.0293439102827344	0.0274281488754851	0.0103573311214531	44
0	0.196219854972311	0.0499933342780749	0.000407026189959343	75														0	-0.339148263150747	0.00374251502292926	0.00140401719212302	0
0	0.16150445085554	0.0700018017401527	0.00846012750248756	68														1	0.395982211451589	0.346628433163329	0.0430200722628009	68
0	0.0856480405944336	0.0507680532288982	0.00945462236618868	59														0	-0.0772405113071337	0.00983608883207697	0.00893060451558897	20
0	0.403445498340651	0.293576255454304	0.0558625350500936	84														0	-0.110373334316429	0.0136319393904411	0.0252525058229217	30
0	0.0672577203069076	0.031019122304016	0.0115996842374561	62														0	-0.228112026797847	0.00649588497559821	0.00953897336168807	6
1	0.365843530812168	0.193756940041693	0.215751063200448	78														0	0.205947279893111	0.0496079949301244	0.0522203302149906	69
0	0.104347224602337	0.0399993983234852	0.0187773706925751	59														0	0.324676040074611	0.167078401519862	0.0971860405354806	79
0	0.158420291371598	0.0642326503723981	0.24548127638858	53														1	0.126371328545754	0.0513950688083261	0.0775360125094774	47
1	0.305960638302123	0.164189322009623	0.084233445880601	73														0	0.362718090588472	0.146377890802885	0.0415021326322913	91
1	0.334544906984465	0.133002538981156	0.0432251608370633	81														0	0.155604753096908	0.0624623907189022	0.0109006376284567	82
0	0.171482532069971	0.0453179925814836	0.0273992551922499	56														1	0.173197219099296	0.102689128373384	0.0131652359404155	64
0	0.239808559851812	0.135614838990219	0.117628437657154	67														0	0.119407994936423	0.0463153115801781	0.0258469674105672	40
0	0.241297746194603	0.0857918419582244	0.112835308036062	62														0	-0.106157858498267	0.0176581329700222	0.00827801183594956	38
1	0.263430576660839	0.125283029175847	0.216305008232063	63														0	0.240631912049615	0.158311741144282	0.0145288908470902	90
1	0.210326628666166	0.116984248729824	0.075327738913759	84														0	-0.0914804331661892	0.00890303115377347	0.0244682101945016	14
0	0.125421874458378	0.0366343797323872	0.0124006413288208	74														1	0.33021551997301	0.0718746871360252	0.178212150065935	64
0	0.00350836781539433	0.0262250292263304	0.0133426661642485	53														0	0.234590618966503	0.122594577831231	0.018004108364637	84
0	-0.00710523659271548	0.0317193281021262	0.0027251609246707	53														0	0.251426993507281	0.054949760940835	0.467773735232138	38
0	-0.0226353845453254	0.0270913198344216	0.00438695671108156	49														0	0.485767071579611	0.134806106051238	0.893599283617394	75
0	0.714326686159114	0.151429696317284	0.999914742581713	83														0	0.222440769774097	0.0468095118279429	0.0190903134725032	77
0	0.152083681192474	0.0615256603815678	0.0179201310616523	78														0	0.247316064259994	0.179188796163917	0.0480835090638409	85
0	0.225410233493709	0.148648494111847	0.0752906220161953	77														0	0.329400256635946	0.122350971954275	0.338401011423795	69
0	-0.0825764141978935	0.00985625358403022	0.0614018817317385	30														0	0.279529528973176	0.174930700201764	0.0465677798239596	84
0	-0.0464189029729566	0.0143341748203765	0.00361389421959227	47														0	0.168687909990844	0.0908473077952833	0.0411177773068597	62
0	0.307016357417968	0.112103155345551	0.478255993861508	73														0	-0.0456407229587145	0.0164164915434642	0.0171195875018899	27
0	0.0541411899543062	0.0386719780673818	0.0273262507270276	47														0	-0.125436361827056	0.0167027513440445	0.0108354514287364	32
0	0.0759829161031234	0.0293478050314275	0.0351722924810433	55														1	0.00479056199636408	0.0396847295338568	0.0247697711090347	52
1	0.453007260823534	0.299760648934755	0.4675168573515	85														0	0.122930326628422	0.0309160650996542	0.219991947376165	56
0	0.204671029956109	0.093492239575059	0.0489844777676515	55														1	0.164039852908592	0.100950636018776	0.00806541076160538	64
0	-0.0163666035999784	0.02705909813816	0.000695662574868176	42														0	0.105992738539137	0.0274786504079075	0.139745148030797	40
0	0.249813975437535	0.110239720194489	0.0159755719941532	77														0	-0.152558205096968	0.00786665715582576	0.00569813085044547	26
0	0.208488338473015	0.197447288143807	0.00500231344952471	65														0	0.0479285219658105	0.0540998595005081	0.0175226387258597	56
0	0.175721727939198	0.10464828046023	0.102957226865174	61														0	-0.0754106063190614	0.015268050282096	0.0141559263998902	34
0	0.222094852403727	0.131384227206168	0.0130777375144857	79														0	-0.128643657279113	0.0121064868334542	0.0138718129647872	31
0	-0.0372372483049098	0.0259095402861229	0.00209999104380456	48														0	-0.11045609794575	0.00993116477143	0.0181447826291646	33
1	0.0679962196830347	0.056067853128117	0.0675340954019537	46														0	0.0214210422001307	0.0199403616151678	0.108539114360222	27
0	-0.092255657854021	0.0126445807592191	0.00342057587980737	24														0	-0.0293500996367316	0.0185582456957777	0.0177800783853483	30
0	0.141767474574683	0.0751841101759197	0.0101048860606508	63														0	0.303334339575678	0.159655020968013	0.0224344243850232	89
0	-0.16216415469962	0	0.00183056218121246	20														1	0.385248063020168	0.141997639289977	0.562300079452868	66
0	-0.198228784786419	0.00557852303281754	0.00071854033562831	21														0	0.293881363548062	0.116492429506079	0.0164174606380249	97
0	0.167809005667684	0.0845014513482364	0.0176491670823603	46														0	-0.0473454823793986	0.0244502984407454	0.00560547191197225	44
0	0.220359389809074	0.116378149132867	0.0145657443708577	78														0	-0.0045434929623877	0.0117260003795667	0.0156449465530451	47
1	0.445239433192075	0.228049195566968	0.0339958446939172	67														0	0.220212049619291	0.124322269263953	0.00996097811339974	78
0	0.0614279972716975	0.0420734037452316	0.0341043811860609	43														1	0.401229693105262	0.136246787610289	0.0906397670257816	85
1	0.35085863580411	0.161847811795703	0.0393823045967906	90														0	0.301922259914037	0.187728319868427	0.064507503346176	96
0	-0.0125622095584518	0.0210518326023053	0.0258198805130656	33														0	-0.237718791923349	0.0042981287287081	0.00625073046876462	16
0	0.141508548973714	0.0635963186692616	0.0408930316201667	58														0	-0.21006336486407	0.00599710381442868	0.0224062146773485	12
0	0.197614578107721	0.101051884033858	0.12462753327865	82														0	-0.124746155311566	0.0124772372987066	0.013640216146887	34
0	-0.11256469115896	0.0138703159286676	0.000108776123713268	47														0	0.113626322434444	0.0863662640252506	0.0180753052360571	65
0	0.166507141350322	0.0827042942471711	0.0638320238310038	69														0	0.0526463576732781	0.044577387867719	0.00803768539560483	59
0	0.356620837859332	0.0915916737340634	0.231045006528006	70														0	0.59090923743071	0.296153839207494	0.821255009983695	78
0	0.00108643085681827	0.0148209432752291	0.0116304510426967	53														0	0.405665764799215	0.151721216024044	0.415122260854566	59
0	0.298454197222382	0.16837537976652	0.0346671693417384	91														0	0.0460732655310358	0.0249081657660093	0.0107903899304789	65
0	0.00687456732481173	0.0518906750687144	0.00383493717558981	53														0	-0.293305601536073	0.00349666898744251	0.00382239003238853	0
0	0.0174587297369785	0.0263523742880993	0.0276671752560191	38														0	0.41624014231519	0.200036274886701	0.497001466584986	57
0	0.053138574030844	0.0234499230142023	0.0825328850451047	49														1	0.33039148013803	0.132574198636595	0.122784153878147	74
1	0.635378836534775	0.241777900185382	0.793007548854926	89														0	-0.266660388777856	0.00430916081908919	0.00205159369421293	0
0	-0.0304266246682425	0.0192558953919766	0.0240748088601624	39														0	-0.210453830351451	0.00469943740591976	0.0116578426622735	0
0	0.0638633167278634	0.0509438299510191	0.0552261028819267	60														0	0.535463377533051	0.207331571139174	0.887785933406506	88
0	0.101305963903114	0.0434505542443416	0.0472153472632272	60														0	0.286705569149242	0.131847291977209	0.078265316652316	92
0	0.176979002108804	0.0623289220080884	0.0355883490535409	62														0	0.168702037534263	0.0718882598156008	0.0816620344583279	76
0	0.163132403858493	0.0111561008561152	0.153843312806949	19														0	-0.0310125626928597	0.0288927471868003	0.0127905020916752	40
0	0.0218046611062587	0.0339291994334645	0.0200636103574825	52														0	0.13843581743225	0.026762229295958	0.372712365610398	28
0	0.175361889463704	0.0885252020432383	0.100923990398284	65														0	0.269895760364931	0.177559828767431	0.0341019950602398	65
0	0.0237407133192171	0.0252235941732143	0.0646574242741207	55														0	0.31955686546263	0.113636135300138	0.5816559535742	67
0	-0.025459012102678	0.0156180342413014	0.0042655481293259	45														0	0.00149013280228231	0.0551351220100842	0.0154119383578526	34
0	0.0883321310193096	0.0428482125770427	0.00514756866437279	56														0	0.366749686983401	0.260191906121414	0.0557662490013829	95
0	-0.0284315690984745	0.0180005242442049	0.00269247073330805	47														0	-0.325242096985973	0.00318722221776146	0.00126369169657856	0
0	0.0419025015324857	0.0435804066083178	0.0129823149202115	60														0	-0.324802029699751	0.00282525168053593	0.00160227483288209	0
0	0.106463271262965	0.0460850193205654	0.0371719671046889	64														0	0.16344128034634	0.0525158434783354	0.109065226622678	51
0	0.0452535195414066	0.0453651823398052	0.0296291421577216	46														0	0.279621050373099	0.127545476896008	0.0231020046420145	93
0	-0.00125690949248687	0.0141513676134654	0.00128679899400424	49														0	0.280790194575116	0.157394569129194	0.0341424120461296	80
0	0.178066688535112	0.094182092229512	0.0178261838305426	65														0	0.221343718378998	0.0556290228735886	0.080336124522926	44
0	0.117120723191205	0.0418591350019461	0.0132084777433742	55														0	-0.380141540653616	0.00200523733374928	0.000887305251337966	0
0	0.178655190387575	0.0875361359094553	0.0937766492325182	70														0	-0.162842380362254	0.00954214802174459	0.00921370878160693	31
0	0.0153679296571676	0.0208813821570413	0.00602281247923184	56														0	-0.114045823708816	0.0190203427870603	0.00538678297047324	37
0	0.107257922651134	0.0483730834597982	0.0364743471398708	62														0	0.0541289314908984	0.0351041956015247	0.0301056673531202	38
0	0.00796514831578645	0.0206069609082078	0.0234169444995732	49														0	0.305871934203814	0.12912170033121	0.0582890950871029	85
0	-0.147042899140921	0.00940354285485186	0.00714948408467952	28														0	0.393135886753843	0.17793569217486	0.0260485493299346	88
0	0.131529402203816	0.0816340047991412	0.0593175773824305	63														1	0.150089478619877	0.151612422575346	0.019902073025202	77
0	-0.0556263535171784	0.0118401354272963	0.0432411032262515	35														0	0.131796875926028	0.0760051782351334	0.0267198853483014	64
0	-0.0222426824085362	0	0.00679648573693671	50														0	-0.230041416347429	0.00537979079189961	0.0136699791419824	3
0	-0.114627040908338	0.0118757148708274	0.00420209968624084	33														1	0.194861029637349	0.0742707124110166	0.0332214068571019	82
0	0.302695655496779	0.111628798544702	0.12328427615606	72														0	-0.288384884573145	0.00189220091065086	0.00446753460371241	16
0	0.236579089688088	0.112194255196942	0.040547988868483	72														1	0.489482501476793	0.265617649040987	0.320369220554703	87
0	0.215955423490174	0.0588719933117909	0.123620737686829	67														0	-0.171385762508619	0.00922564647076866	0.0156823026968521	24
0	0.077145606785776	0.0407146320669662	0.137509465839834	68														0	0.187366598957345	0.110989953300807	0.0181557445040081	88
0	0.0388642012419438	0.0279102908692883	0.0798784323515557	36														0	0.270038812229766	0.177352476193903	0.0160196918388975	91
0	0.0430338136571517	0.0304924593216116	0.021119559347091	57														1	0.363050693955495	0.0850884620528804	0.042662422045362	68
0	0.0755778158210606	0.0449928520711444	0.0281080146723647	64														0	-0.156552215970904	0.00912304070549253	0.00383418619098522	25
0	0.234344968774794	0.122596619508945	0.0706163502403302	75														0	0.0448895103234968	0.0293664497282885	0.0469651270574315	40
0	0.00485939121943326	0.026390523451067	0.00810127208218425	49														0	-0.105902186945212	0.0193905822257291	0.00270716223662755	50
0	0.43108481444762	0.226828109652729	0.430122857102402	83														0	-0.00601991313610387	0.0712751214543116	0.00326545550941268	61
0	-0.125829814456628	0.00317503153526671	0.0074813695256682	33														0	0.767953257380337	0.0485448254612564	0.506526717487048	39
0	0.333204234251402	0.171051324706326	0.320261804566522	81														1	0.266582175927997	0.125390627015694	0.00848490276791655	94
0	0.404243065845782	0.302427548135866	0.152508184728916	94														0	0.203031713620641	0.0490749178673595	0.013184208261083	57
0	-0.01016110302883	0.0316212281173282	0.00480487442233337	39														0	0.119577514379476	0.0792072934683064	0.0451666595954337	61
0	0.323399515735954	0.140594135503551	0.324438562320467	76														0	-0.216632145185855	0.0069608299668841	0.00704304764138155	10
0	0.0840630994938695	0.0657863339274336	0.0268896268930174	55														0	0.0104940828802982	0.0450298271184884	0.0124719561990132	44
0	0.127684155968772	0.0352283366989493	0.0115526798502792	73														1	0.378506872285414	0.230464126519768	0.222673248719611	94
0	0.308221301544947	0.161077141314871	0.0961514871217881	87														0	-0.242242402031737	0.00630712351642611	0.00829234187155638	2
0	0.121324140597144	0.0728054758547734	0.00414300244717593	60														0	0.0340772361691486	0.0316353516940791	0.0108327164512034	39
0	-0.0115167250439473	0.0173458898915731	0.012657451870187	42														1	0.246921373693899	0.133660490215347	0.031340635609205	91
0	0.259405538589055	0.0657937423821933	0.648382094260695	60														0	0.167902061907208	0.0958169291829312	0.032930779814955	69
0	0.212228934908042	0.137363929669353	0.0927645103811134	73														0	0.0605617926307203	0.0364748895188581	0.047613816918366	43
0	0.382504538548885	0.223881234674666	0.0253675181213694	96														0	0.39267507066877	0.230078877416227	0.029224235508133	93
0	0.194868080440521	0.132037323244463	0.0297281513873538	74														0	0.154371350613715	0.0480211593843487	0.0447553089217687	52
0	0.111259788519504	0.0481940505392211	0.114030060774668	52														0	-0.309319829105866	0.00201899476868402	0.00156243604041749	0
0	0.195892059621723	0.0715359150474585	0.0452127283007459	54														0	0.319387120191099	0.139795426733366	0.0272487839224837	91
0	-0.00853369507956699	0.0246377939921202	0.00434955404458265	47														0	-0.0181550800511853	0.0323981806128509	0.0171712894993661	41
0	0.410515074844872	0.227710996787686	0.541268693475225	75														0	0.139400837915698	0.0427567659878762	0.0595507826589127	32
1	0.586253241384346	0.277623737801176	0.966100319289702	90														0	0.0022194822821974	0.0217254880411384	0.0378082754898726	30
0	-0.0867412219366821	0.00901867719532888	0.0371040254684505	32														0	0.196945270178597	0.136391071546543	0.0214358854696447	79
0	0.0706000708706261	0.0426463211627759	0.00634766775252996	57														0	0.0576102137828183	0.0133010682686881	0.0235057744668807	33
0	0.247593502955116	0.0851727350182188	0.0329572028157195	73														0	0.221763035189772	0.133662279522967	0.0561910040769294	57
0	0.0758159763043705	0.0454030955796143	0.0073836662843659	61														0	0.303763113796735	0.151145436740678	0.221828064948337	64
1	0.668346274629001	0.216503589301779	0.417196235572684	79														0	0.025084755441757	0.0388960781127713	0.00403360417327647	43
1	0.334931945926977	0.0847988064899373	0.114649301746196	76														0	0.00638806009277725	0.0222002256059075	0.0418007654116392	43
0	-0.172635045255314	0.004339670810783	0.00891670660643497	26														0	0.0944290309444935	0.0416849986035258	0.0787548672788052	29
0	0.184684655372486	0.101432025409942	0.126312814333977	68														0	0.0899179975588705	0.041799837683224	0.0594718733282962	46
1	0.279863959808726	0.156240065628172	0.0247835355703198	88														0	-0.002574170371951	0.0178971004075175	0.00816628561881923	56
0	-0.0248509528881738	0.0392086198073558	0.000906053338803081	48														0	-0.148395591863055	0.0105571513931014	0.0247229205919576	21
0	0.116303595222461	0.0166625195284665	0.0088040455033506	44														0	-0.0835582775071629	0.0118798170146504	0.0114598805871034	38
0	0.0588672978912547	0.0484147634051887	0.0945811963632603	57														0	-0.203319490773509	0.00496214087235837	0.0118538607989585	1
0	-0.0967990972347843	0.0137847172985938	0.00780679830258672	32														0	0.00471696875705875	0.0367121844108864	0.0127141011025003	38
0	0.207229878964787	0.129839711306282	0.0446948764310422	75														0	-0.0463151725251991	0.0237165453049482	0.0195318836668494	35
0	0.411875266887271	0.126232323979335	0.191708322552364	66														0	0.365514630889957	0.172776743050985	0.0833150698441542	95
0	0.0854882456049941	0.0463251636049699	0.00844494934707427	60														0	-0.0729255704620942	0.0135446705052344	0.0372473899534448	23
0	0.099931315660092	0.0232499170513137	0.0247322758554693	63														0	-0.100030435709289	0.0119014186156995	0.00828226084245013	44
0	-0.00548360631036766	0.0157095177189098	0.00464561111069775	53														0	0.0866991312572545	0.0419687577730703	0.0205247412128441	65
0	0.222101012322216	0.0406982807237726	0.00534779973500455	60														0	0.00860782418992462	0.042768096232121	0.0116681666658504	44
0	0.0436457898003174	0.0323564177706718	0.0116644222635931	60														0	0.177230729231302	0.0988443375250907	0.01218042221756	62
0	0.124374457141758	0.046730401790588	0.0753496130202161	62														0	0.297575860773318	0.128767854349008	0.0165432375710678	92
0	0.0357153800779144	0.0169524061338349	0.00676923520185163	52														0	-0.0319653329312551	0.0254501768503264	0.00563631665189054	24
0	0.348197063150838	0.294693308529955	0.0715478148822673	87														0	0.036038305599376	0.0506693183484316	0.0212414663910105	49
0	0.0929184879480205	0.0586414967484227	0.0214941509153315	47														0	0.40851126244213	0.26317146109221	0.0529219643010383	94
0	0.195524983478363	0.108297843845823	0.0326188599746421	73														0	0.219400683232393	0.0710866775181981	0.140682876108458	44
0	0.358639396041742	0.216040573008439	0.603401648680996	62														0	-0.101214307611095	0.0235365290692939	0.00557713271699137	44
0	0.0475119208816228	0.0755033712014069	0.00570755294468269	60														0	0.0502032183822091	0.0301446743925117	0.0461872473835357	46
0	0.0173165629817285	0.0284676233033717	0.0105644826258462	44														0	-0.119418349120355	0.0110451336284043	0.00609276087472601	28
0	0.0408147494378827	0.0268673759415307	0.0139970201427782	58														0	0.0190469630606416	0.035456966516669	0.00300294521624285	60
0	0.247113858724364	0.131753184176139	0.0624257024423156	67														0	0.130894240111891	0.0361830024902628	0.0380824117093841	44
0	0.392568642210663	0.156504163278338	0.830292133896249	59														0	0.367045055917209	0.0180859412967406	0.195070170921119	48
0	0.209238246664721	0.153827040440192	0.00716220138095548	73														0	-0.125269644751111	0.0204139978309662	0.00367856516051879	35
0	0.256656080588013	0.13800665793684	0.115363183277301	62														0	-0.132627450092917	0.0125398224155473	0.00622867064093574	33
0	0.310617651266453	0.227726706198156	0.0817431660290553	72														0	-0.0950081286466241	0.0205668214741983	0.00854877714387255	39
0	-0.0281939254843076	0.0132057091706323	0.00570652633813496	36														0	0.0888093928294332	0.0372582662743238	0.00917709538161033	55
0	0.374838449851672	0.297427626815581	0.0390083529067111	89														0	0.275010528755087	0.036252832743208	0.659022133608698	53
0	0.0272545584494719	0.0252792564529907	0.0191944713169982	46														0	0.138000376714662	0.0550135204479158	0.013661723738618	57
0	0.163962532415458	0.0820798209777088	0.0532283937595561	68														0	0.284496928926934	0.0652828173225942	0.224189020954968	54
0	0.044595927740635	0.0400578471596994	0.00252753527261386	51														0	0.177003653088092	0.0665319862150404	0.0188780769864661	55
0	0.277194676370723	0.17297028048629	0.156615670320101	70														0	0.0574643747171047	0.048652825779175	0.0217513537449308	46
0	0.13806426208933	0.0580684429426558	0.0147881586405132	64														0	0.0810293777874389	0.032531984828715	0.0300711947420456	57
0	0.0344266430886112	0.0327109369460526	0.00270202011789929	55														0	-0.0926104426349361	0.0154473532676526	0.00707813790802527	33
0	0.0333147676964961	0.0198919326912365	0.00385412418474065	55														0	0.0235338639065877	0.0448062710456755	0.0113079499984663	51
0	0.110519343525401	0.0586166234556834	0.00708120282185463	62														0	0.0480254997726682	0.0315077342637401	0.0116929843487322	51
1	0.327096762418551	0.176609268824099	0.0985866447082487	83														0	0.55712828852032	0.149603404972357	0.5508340210169	60
0	0.231956073069147	0.138263779737376	0.0182939788177462	81														0	0.133944524333852	0.0582483174772178	0.0527039207090314	59
0	0.103332905322206	0.0659334662720582	0.00461464458491892	63														0	-0.0248479346683822	0.0230831403684073	0.00820328090935805	58
0	0.145502116658397	0.0782321459608923	0.0368504836721518	68														0	0.197251120474676	0.083380104423088	0.13259497196882	51
1	0.444963220693455	0.171936936385282	0.241449353543022	84														0	0.0397523456876023	0.0301247373512982	0.0178999426180547	53
0	0.0638703752335723	0.0362487710135633	0.0116451143985341	50														0	0.160232105643147	0.0727311252877196	0.0294657145978085	52
0	0.14772142241043	0.0679926575870651	0.0326309160873093	60														0	-0.046780577001723	0.0149485646838065	0.0141511616886025	35
0	0.00281689168223618	0.0193562972478092	0.00211878821002651	49														0	0.0874891054923715	0.0544303363609425	0.0192658835059717	52
0	-0.0821541684668534	0.0157432463000016	0.00468263846606489	37														0	0.0499950715046923	0.0548659170479486	0.0183231028298667	52
0	0.161406764100833	0.082539532038695	0.00905771047619047	70														0	-0.0737625515398427	0.0143305390554494	0.00635997355085294	43
0	0.136166102966324	0.0576064788466182	0.0323120352158934	73														0	0.241504296275083	0.154900957571775	0.172264166046343	61
0	0.126922314940757	0.0406626224069224	0.083507310119947	51														0	-0.0854608774840965	0.0206223951600008	0.00343222107095263	38
0	0.120756607926755	0.0431720826748138	0.00663822762280607	61														0	0.121975619101274	0.0684857124385016	0.0289872474243551	49
0	0.154227070084479	0.0536569166437837	0.0257072212750251	62														1	0.652936129298124	0.241036778521795	0.983897508415583	82
0	0.224088774173295	0.097133263227004	0.0624397972757796	68														0	-0.226792788419465	0.00848203792338535	0.0016190223300107	32
1	0.34250536076039	0.204571832020863	0.151697367557823	77														0	0.0616397850689254	0.0461449035713318	0.0339177651898213	48
0	0.0994003226797457	0.0502322298130087	0.00554284054519011	65														0	0.0775516052012321	0.0458196254199027	0.00735681820032232	60
0	0.182319324227518	0.0906638561497981	0.0263288091216147	75														0	0.155752685464957	0.0757599063634663	0.0304347672989131	66
0	0.35502541238889	0.269403949569184	0.0500550881478303	98														0	0.0426410563744649	0.0345186484337672	0.0156505891471634	52
0	0.116572393732488	0.0509931142353713	0.00393259623622318	63														0	0.199776900624158	0.09878305980469	0.0691968538447952	58
0	0.249561008743605	0.0988440982415994	0.0782561519958851	73														0	0.252963303114755	0.0789840698415766	0.0550765988129992	79
0	0.0899631621134201	0.0420598421395604	0.0307581276831745	65														0	0.00553201107841791	0.032182063717443	0.0469173760779392	38
0	0.177754279038401	0.0828498240612639	0.00680191203450269	68														0	0.223537216002086	0.0683716933213076	0.0413166679967206	55
0	0.276413533590902	0.11028951387631	0.0989068698329468	78														0	0.287244320362198	0.119754603873666	0.374244217816145	57
0	0.168463458489183	0.0403550072283174	0.0114232548358306	82														0	0.320764401461716	0.0817748850579629	0.701872743572271	61
0	-0.0682739713338163	0	0.000509520960110444	46														0	0.022828128823832	0.0311875090493762	0.00963114870732591	55
0	0.0421982548234453	0.0457449138310511	0.0168070009183124	41														0	0.339690630248965	0.0721742121885516	0.874491479058253	58
0	0.288436285183973	0.150727689207849	0.0232758047398672	82														0	0.111287123495103	0.062300310173983	0.0635510979746692	50
0	0.262155337076842	0.216471558403121	0.0200942258266685	85														0	-0.0033442811752006	0.0225575501162051	0.0188866546853588	35
0	0.143731935610415	0.0420458564165624	0.0326481555982339	74														0	0.224686396805223	0.121176928114207	0.0332409881013633	66
0	0.135895581968139	0.0933193784639058	0.0119939090991621	70														0	0.141571582141484	0.0448589468328119	0.159887878429607	50
0	-0.244625471154881	0.0043201519485992	0.00922235232128917	21														0	0.159171410608453	0.0799193503738005	0.0136234907260925	80
0	0.00498231763709985	0.0233311516477929	0.0119173630689724	54														0	0.213386873833929	0.0628300757030242	0.21081039916052	50
0	0.217365055109281	0.107437479869497	0.0109149175909225	84														0	-0.0629069223709362	0.0185268842533232	0.015413869130598	28
0	0.206059080443157	0.0904370969351726	0.00849564284593105	85														1	0.414169897139545	0.193011540100696	0.107607542290436	80
0	-0.0453120437012791	0.0151115009447506	0.0192486144417714	31														0	-0.0248535622370257	0.0231924069141299	0.0113338827653657	43
0	-0.0258213136447104	0.0222182656498928	0.00383329482692586	40														0	0.0132353368076653	0.034745486314546	0.0067998229293049	51
0	0.234171992512046	0	0.00231130288303714	78														0	0.111084607769626	0.0525408261405376	0.0246118784333664	54
0	0.259888097463521	0.1679473155791	0.0408684480846646	83														0	0.177569247733648	0.0921274147737302	0.0390405311678604	64
0	0.073899670215393	0.0490200441824271	0.0150341910730579	54														0	-0.018959520956806	0.0287791323540178	0.00761321189911328	37
0	0.30405633605133	0.125876466946534	0.00977562112475443	83														0	0.108632581172056	0.0459978067581702	0.0390149789219192	57
0	-0.00408161602011307	0.040376555529094	0.0085324472709213	52														0	0.12432530806422	0.0431325382811764	0.00791320668058001	69
0	-0.0592799692303922	0.0187800181832147	0.00202900251122002	41														0	-0.105464939438324	0.0133303517744934	0.00353706881807397	37
0	-0.131825563462954	0.00778530149968924	0.00915135352510188	37														0	0.0910587706036807	0.0467678941950983	0.0199922554106074	51
1	0.234455708636227	0.0309819455564528	0.186047524159361	61														0	0.46511592733784	0.134125080750953	0.383298116222045	69
0	0.0967375529646346	0.0209972463216825	0.0280338051341089	70														0	0.240014950187823	0.129372578976406	0.0195219426289257	69
0	0.0839639883965581	0.0316459248275808	0.020290368525729	65														0	0.046893618179126	0.0319547699852882	0.0605036491247496	55
0	0.0357689870218184	0.029755066583027	0.00209540689589512	54														0	0.0321948369417297	0.0258533145936634	0.0349280027511276	12
0	0.266297893225421	0.10184562294629	0.0390462321084299	90														0	-0.0999707086105577	0.00718952554251168	0.00502465764912567	36
0	0.225330652978522	0.131448454593569	0.0167175077705581	78														0	-0.207275838082041	0.00587898157273511	0.00223148295434085	28
0	-0.182186440970654	0.00567151859030269	0.00271295574069831	27														0	-0.155591950631823	0.0103377387700753	0.00800561774887942	33
0	0.108557147775905	0.0524935129905692	0.00658823399485862	67														0	0.219522199784148	0.0759076075386154	0.118571999745235	61
0	0.23690455399794	0.12932486613706	0.0298304861581104	79														0	0.110028602719821	0.0508534415581728	0.00800588358112049	70
0	0.211053236447569	0.0506125272095791	0.0142644186299289	83														0	0.0390726936557474	0.032729246114331	0.0149252610186934	46
0	0.0146361473921956	0.0206297750170567	0.0121527821995057	57														0	0.0821890372736954	0.0300696379048634	0.0144791042292449	60
0	0.13978548326611	0.073729072390112	0.00931067020920568	71														0	-0.106143236582056	0.0150613837235865	0.0160985526296954	26
0	0.280377140194613	0.119830474064126	0.0189070948936609	95														0	0.226198394738458	0.0872884244124545	0.0423170222929249	53
0	0.0724673791704691	0.0405862425213868	0.00512308659316527	58														0	0.453540406253309	0.137275000185456	0.472283025316299	63
0	0.167637451281791	0.0276484443248545	0.786400104397	33														0	-0.116628443644576	0.00795195877967706	0.00635579505798226	38
0	0.33908874994522	0.186596254611234	0.567645704359072	93														0	0.0852779416622264	0.0480497927600783	0.0287890653653566	54
0	0.401166968131904	0.239974510015998	0.217676909627274	88														0	-0.114384330954132	0.0116080905992522	0.0104409562532711	27
0	0.291130358686021	0.152323118477584	0.174209441692051	71														0	0.192616437388656	0.055329913377076	0.0122573116373338	84
0	0.0249305235919591	0.0218859161960567	0.0818945419155307	51														0	0.162099229859141	0.0597688217340799	0.0833654129807591	57
0	0.048676867768011	0.0278539943106717	0.0891073686780745	55														0	-0.0169550228167816	0.0254569557048126	0.0128600644478185	41
0	0.266455916842343	0.162697476048	0.126850460713138	79														0	0.0126081307360398	0.0467545883801602	0.00919711785341878	58
0	0.62710057084214	0.215981541475983	0.49506668090898	85														0	0.169744802362996	0.0484174432262819	0.007133911291494	62
0	0.0741282260362415	0.0195174111481201	0.00494435609066192	60														0	-0.00696480543141657	0.0229184641316208	0.0146948621566841	43
0	0.175582483220299	0.0547978918544314	0.0638596423351385	64														0	0.0258864064972531	0.0305592383156734	0.041367806620895	41
1	0.40233255867843	0.288342756150331	0.0566492811554894	86														0	-0.116332688837761	0.00624978748021423	0.00635565085963757	40
1	0.385342605135315	0.294615237664872	0.0152949730343456	103														0	0.134073416574371	0.0425208620763657	0.0959911493901367	59
0	0.168036419132952	0.103491965814747	1.52769325106294e-09	75														0	-0.0432955811856746	0.0231382755128404	0.00570119413204933	45
1	0.499934849865032	0.319225088436782	0.173088473965945	95														0	-0.200598254979541	0.00334360489966411	0.00577694069376293	20
0	0.338955543611131	0.165026627423537	0.25270958951399	79														0	0.0969979092720398	0.0557657078956234	0.0257737136481274	54
0	-0.134534965862718	0.0066183442613682	0.00474647192783434	29														0	0.252430768485356	0.106967190532274	0.099916189441786	62
0	0.0595509286601445	0.0385412756269078	0.0332089518232022	41														0	0.300373657822806	0.0646810510705288	0.566100316960978	50
1	1.49469653303528	0.857383141045028	0.0740002209691045	86														0	0.389466160959328	0.161231154602762	0.294688566929909	76
0	0.194477206018382	0.101462357681357	0.0592588482908991	77														0	0.061388863127011	0.0457531734599555	0.0542532122716632	51
0	0.208496478425258	0.0550237403716839	0.231764613971002	49														0	0.0139872604828659	0.0136308024236137	0.0898147365614896	30
0	-0.125030090673558	0.0123812880584579	0.00337989870047145	29														0	-0.16120322013682	0.0052283053531103	0.0120452670738843	2
0	0.367891921987405	0.18080145311478	0.337353590924874	74														0	-0.161698061521825	0.0107899830324934	0.00872335221085457	26
0	0.487293849426534	0.131530388716918	0.875529497504137	61														0	-0.233141506779373	0.00432593742522433	0.00166910932562892	14
0	0.147930477135565	0.109119219889362	0.00696754840163612	82														0	0.0655582369501933	0.0436884684036901	0.023305620298967	46
0	0.00500256453439607	0.0130301844365751	0.0120320074247902	34														0	0.141366554120061	0.10396693298308	0.0590229319096044	60
0	-0.0297583722896832	0.0128562142130306	0.0194007922819392	45														0	0.171893175738119	0.0497114360492858	0.162164436576039	44
0	0.126740194299331	0.0417401802149196	0.0400247336074105	52														0	0.0363003937302977	0.030521068631008	0.0160362252677608	38
0	0.0162105632229894	0.0185721673335758	0.0175630325483157	47														0	0.0363947266247307	0.0410716489442669	0.0193587239436656	53
1	0.441784762078982	0.212061183713443	0.33389073570269	91														0	0.0245270063443272	0.0317548127037489	0.00706235816350077	45
0	-0.110026429031267	0.0145211738037535	0.000482092465363047	30														0	0.194096760064424	0.130924476651907	0.0495209830236404	60
0	0.404764570564995	0.0839146350324491	0.913721870437609	66														0	-0.138982059294137	0.0107840010793597	0.0199707117183329	18
0	0.0454049052300462	0.0271416950266869	0.000857064526473557	62														0	0.112377131030025	0.0334188715023357	0.0127650177981427	44
0	0.133973032302537	0.02124979404274	0.0287203104275161	61														0	-0.0674098147665692	0.0139539611755311	0.00734920351652921	36
0	0.757629886583847	0.290345449933636	0.498810043871679	81														0	0.0840788786011136	0.0416124801733256	0.0684987793515854	51
0	0.206709741603135	0.0426248322069907	0.00570631073163273	85														0	-0.137239719390005	0.0103149790281865	0.00611205929450585	30
0	0.17018338450099	0.0500355668521105	0.0062946546982985	80														0	0.10715956163094	0.0447367049443956	0.0345572689987434	56
1	0.630192059379723	0.347985422296945	0.747995528101581	89														0	0.303663473892126	0.0955241969311064	0.668488067832465	60
0	0.0622484084194021	0.0402256700935617	0.0300844693206098	45														1	0.671367728618858	0.16117353646875	0.745287186616899	78
0	0.237473708476445	0.132278351588461	0.0232712583650251	85														0	0.0456077522796267	0.0342931276673442	0.0261740707069772	39
0	0.201780693946375	0.114350029125456	0.0351326437784976	71														0	0.0713102280170538	0.0463737612997863	0.013065201717165	53
0	0.203766764772077	0.0495411375297461	0.0232958190915974	84														0	0.077312950203748	0.0583933110826588	0.0212817614312752	55
0	0.144893109962491	0.0174763029545629	0.0246098706136868	52														0	-0.142237908704848	0.00881657130384839	0.0146281165232884	9
0	0.234160030552875	0.0938913915932493	0.187889877474171	64														0	0.162103452597386	0.0772486939363913	0.072673393926561	57
0	-0.108739527512662	0.0123308646372769	0.00807519795429681	24														0	0.228535358044997	0.0804482214682716	0.0281268892188044	66
0	0.0815289948564973	0.0316417921549334	0.0222289528751346	55														0	-0.0197731709077172	0.0092841243632516	0.0614622734016659	29
0	0.0985428843360122	0.0343885075528641	0.00368152490913129	60														0	0.0542416578963567	0.0571324455000384	0.00806868246079514	62
0	0.134698022452375	0.0556329399055101	0.0241593009428305	60														0	0.0233651047800429	0.0178327095823516	0.00378587637348802	54
1	0.556292537264036	0.208981559565208	0.000841788320362659	100														0	0.124011990678049	0.037437584205973	0.116416409526707	42
0	0.103525880381412	0.0500424418235975	0.0973089036457391	51														0	-0.0525760276292332	0.0270511327580954	0.0177605920786974	39
0	0.207616175079273	0.0915262098205337	0.182583684692908	68														0	0.090077997930854	0.0549870138036702	0.0184037174283081	65
0	0.180184365010891	0.152151188101333	0.0188715125080036	84														0	-0.0430222793976841	0.0178890141470908	0.00893309838343498	48
1	0.214803511794558	0.0845924166716073	0.102503717070301	64														0	0.0167543684095455	0.0240666604793744	0.0117535921194738	52
0	0.478370598808231	0.298234039295984	0.154240767543895	102														0	0.14194859189992	0.0517318835146746	0.020650138076593	68
0	0.285892458852404	0.121637701799286	0.167139145217099	87														0	0.309815142685165	0.066547896411969	0.0273311366561275	68
1	0.537210774352324	0.267610284183686	0.294092506617285	71														0	-0.0841712053074607	0.00857092758071754	0.0837566293992062	24
1	0.295156831528129	0.117632945150347	0.0451450020683965	92														0	-0.0623204476313905	0.0104003643063629	0.0117249207029211	29
1	0.416363448950937	0.0845924166716073	0.220356541411242	64														0	0.048450474010287	0.0439475510502831	0.0165737353203969	51
1	0.519565700750431	0.239591031623022	0.762900940317597	93														0	0.314111847552746	0.168893497538214	0.0224038748746581	81
1	0.462774589377562	0.145790444497042	0.488549585595689	76														0	0.0377326812036494	0.0173772574154505	0.00726381767078414	58
0	0.520734543909652	0.300691761647772	0.389390179363591	97														0	-0.0277240423016201	0.0284199152842677	0.0234019946717745	37
0	0.124231151549154	0.0524880437798362	0.0834476331152652	53														0	0.143545791779214	0.0964050744170722	0.036544223437355	59
0	0.119471173486749	0.0499869002569983	0.205498448041458	58														0	0.0977771993903255	0.0512066681734709	0.0189237517811824	54
0	0.324594301638282	0.134033965378912	0.0458695056727477	78														0	0.415362073920426	0.127926094501205	0.385616418692265	60
1	0.133523946939632	0.0503930600846404	0.113280674505584	49														0	0.340771734930805	0.159493121330066	0.0988899689521935	90
0	0.0996511589025953	0.0418269485603099	0.00407857818642008	55														0	-0.364080525364546	0.00230046696457039	0.000925080526975773	0
0	-0.0233637140216166	0.024049173715306	0.022826548229608	41														0	-0.0612948766395239	0.0225297724301527	0.0179183005530542	60
0	0.109833015072308	0.0363663637023989	0.0186849279713191	65														0	0.0540217775195078	0.0309374931415688	0.00925902406995884	61
0	0.308308883949843	0.178870136391105	0.0432241441652425	90														0	-0.00016329247731291	0.0376168136648532	0.00575671432958285	58
1	0.449159076971368	0.154724903546234	0.0587001245968916	71														0	0.364813088200681	0.0941392626954169	0.150732871182028	60
0	0.191555289040125	0.0813073191329282	0.0412847898883079	70														0	0.0482572101448219	0.0282362318993448	0.0116246560439135	54
0	0.194612611833631	0.115576762469912	0.00821894989211732	84														0	0.0155624679334024	0.0176080626309927	0.0150080040528695	29
0	0.227088602093763	0.0849842186298704	0.00809524757394798	84														0	0.0694523731628321	0.0312879131517818	0.028197722336244	34
0	0.187247855772057	0.116952982985625	0.0682956214700357	77														0	0.243457717311966	0.112384402949264	0.0194449430790112	86
0	0.552161765154035	0.228520474054149	0.171056264175197	88														0	0.179929646793419	0.0404973480774509	0.0357835097824946	65
0	0.150785118672059	0.0258170849316909	0.455780849097373	58														0	0.177978690630921	0.0747108950642965	0.106002314461584	53
0	0.235814673737371	0.100703409206853	0.175853083556929	59														0	0.0442935477933708	0.0250211787995876	0.00662598162550598	55
0	0.409100546187222	0.157719711784064	0.502150007561067	91														0	0.305916619793716	0.202103534862891	0.0151196633118841	96
0	0.240711053851651	0.067572567114935	0.146116575127697	67														0	0.169977285559884	0.0492422128292724	0.0996695603934382	57
0	0.576555822952033	0.165190360048349	0.973137396501368	62														0	0.26523203383715	0.0908682628531351	0.210639222092378	70
0	0.205049944639137	0.03207721743877	0.0230367147968809	71														0	0.347591447136995	0.194229029150993	0.0990816844317176	75
0	0.0386933485703618	0.0192197507423458	0.00276270103733795	61														0	-0.0990513311523209	0.0149504954296841	0.013549685448605	22
0	0.142908429983511	0.0709692230895944	0.0131837360082123	74														1	0.257821675867883	0.132187073227353	0.0385265583566805	76
0	0.038421508186012	0.0302609937008251	0.0126328684007726	55														0	-0.0862509483253042	0.0190060220865523	0.0297852219607185	31
0	0.199620024504263	0.0963402247243084	0.0212339793667796	76														0	0.199662364979804	0.115600344850665	0.0634421569975692	67
0	-0.161774270920739	0.00247787020511312	0.02819446825338	22														0	0.0826614620200168	0.0969129234120109	0.0118702587925153	76
0	0.643300347605043	0.254380546244853	0.426623706517147	92														1	0.0802119119804562	0.0567234139863103	0.0107521589232131	62
0	0.188056142456349	0.0631194794440561	0.00902617066062632	83														0	0.307336280638747	0.184258157337755	0.103284522469359	68
0	0.170500176415152	0.0992228863122002	0.00449484142240424	80														0	0.0924561139754462	0.0709793933649678	0.0105851210347763	73
0	-0.045170104739059	0.0169947384785713	0.00869253685630942	34														0	-0.0671897645386957	0.024483903494115	0.0157025447544756	38
1	0.518189643348923	0.22936850092672	0.49390032343274	67														0	-0.0779332874907606	0.0169180096239516	0.021416101267499	36
0	0.346093883381073	0.171200351667313	0.068566551299625	91														0	0.28388437907056	0.13649041906031	0.279762637874917	68
0	0.402933002730414	0.209007288937712	0.0298927714468474	91														0	0.108088261734113	0.0616602538659318	0.0257484611299169	56
0	0.306089180171513	0.160794872831706	0.154024343893918	78														0	0.0470798987913814	0.0420043104731645	0.0252959493568001	53
0	0.148149065919036	0.0592016019094398	0.0860301382905518	55														0	0.152892075328184	0.0555214536878274	0.0261650690689088	58
0	0.391494261421115	0.140644125981681	0.0600985206861323	84														0	0.0983727141406785	0.0792615521713168	0.0361388742057737	51
0	-0.0767780525678372	0.0114421136125611	0.0165956475326738	43														1	-0.0723368421098599	0.0154336423414183	0.0119154557993525	38
0	0.301463922767363	0.188849375831456	1.66206500898626e-08	83														0	0.0835449288718485	0.0611519743744452	0.0153122262835756	55
0	0.0588704286793544	0.0385508778741576	0.056766906198912	48														1	0.414836131389291	0.285018238643098	0.0379657589033834	91
1	0.658561141460778	0.28127368021438	0.923627082520124	86														0	0.0106936049379661	0.0350325767801422	0.00671917119870579	49
0	-0.0960784770298353	0.00977004909962921	0.020998135134199	33														0	-0.0410262462408887	0.0156889102476625	0.0161835501218104	37
0	0.350976189902454	0.25261517487494	0.058744343741631	95														0	-0.207415040677294	0.00343585481055094	0.0153648003821228	16
0	0.0928725164109156	0.0338227461751216	0.0474145840505199	60														0	0.43025357473177	0.212962231392614	0.215558982860168	76
0	0.452664570410112	0.261126318734681	0.320655759454657	89														0	0.17418676266841	0.0812400860669313	0.0358965376896737	76
0	0.194088296014494	0.0738125790948471	0.0514131235544067	62														0	0.0110394679738762	0.0251194845205366	0.0195274280819989	37
1	0.420806989478404	0.21451231840153	0.41993507601969	89														0	0.261845622713491	0.172319748549014	0.0373390203633951	70
0	0.0863712692566864	0.0324940994622792	0.0492735047430922	51														0	0.0267571716855484	0.028280455355612	0.00549444680300669	57
0	0.261900977967655	0.110997824939691	0.131029132478876	62														0	0.364936480229999	0.0929760297288051	0.205789212454888	74
1	0.511615312814337	0.160933149066952	0.00960738060640683	84														0	0.0568673610181662	0.0220475371733214	0.094102372008552	39
0	0.0648441086390373	0.0218438788052945	0.0345362213929667	30														0	0.199010931047473	0.0974615267779816	0.0882330474476902	68
0	0.195291029899705	0.0784126607583245	0.0492046872808134	79														0	0.318969696407064	0.138240397304357	0.405027922714155	65
1	0.414754148330268	0.277633158294695	0.0329719649463224	97														0	0.0758625541221765	0.0543415301614185	0.0318972689532233	51
0	0.137248469292253	0.0556701260676108	0.00440991622923691	73														0	-0.0862167091696562	0.0205180337523909	0.00578441825326587	34
0	0.157853710400658	0.0474665283482354	0.0688166857852413	56														0	-0.0735978054911465	0.0113594305120419	0.00527896013195433	46
0	0.168833266595645	0.222652988941567	0.105899285733409	83														0	0.0790026622729818	0.0299829357553585	0.0156819596535008	56
0	0.0516491051917705	0.0284667466284366	0.0296953416356539	58														0	0.166313881389829	0.0865738997897534	0.0471196435724625	54
0	0.00699880265544963	0.0123567697810638	0.00193164476422648	51														0	0.112920878659899	0.0651886126293807	0.0332356449931249	52
0	0.334374754489305	0.0625431727746362	0.0350486727433338	73														0	0.0976029624846812	0.0486774703734131	0.0161076257704558	66
0	0.305990346944889	0.0931854552142328	0.230026809152068	68														1	0.386741340973638	0.132205425720348	0.294037076293544	72
0	0.248549337915868	0.116395233522537	0.0142775012176786	75														0	0.00678842086776234	0.0240621451003527	0.0107748127621172	39
0	0.0729072206908515	0.0566035914526394	0.0496321685935225	53														0	0.236512411858307	0.100674181824535	0.0480689060995615	69
0	0.0105743989432179	0.0217130310999972	0.0117820053713817	29														0	0.112280996980728	0.0695217035858142	0.0105585116051321	59
0	0.174934227242684	0.053688545550162	0.0254959286858313	73														0	0.131968870890728	0.0573158000708593	0.0477375611143554	62
0	0.254071211192393	0.143477734509173	0.121705270178182	84														1	0.607748929664717	0.089300171791844	0.28617245386351	74
0	0.00565928694951068	0.01709327690733	0.0710210401734403	36														0	0.113556882850939	0.0391764591041868	0.0763694862023564	50
0	0.144720532428893	0.0460245543898284	0.226389786006561	62														0	0.0462654259090338	0.0511115162742	0.0118292096258413	61
0	0.120901338645262	0.0739924294967554	0.0136493513730355	65														0	0.190898244317304	0.0667764979862813	0.144353268676661	46
1	0.613774444553686	0.263555253983745	0.937485347932321	88														0	-0.00563191275091147	0.0246274470527812	0.0278971153325843	34
0	0.19571770950807	0.161154547942862	0.021792413478819	85														0	0.176482314884117	0.0931308948489325	0.0223920549762283	77
0	0.327319452081991	0.177847263032555	0.18761537467492	72														0	0.388346174640537	0.142210048181322	0.431342439351864	74
0	0.117478947873664	0.0541751753205126	0.112454617325011	57														0	0.307198950705997	0.164612394033276	0.0252460269120507	94
0	0.159341786348799	0.0597398667602905	0.00278119389357703	73														0	0.254184232692615	0.0888781979576544	0.102543027636241	74
0	-0.0315171546351126	0.0153208241119167	0.0102313983664503	50														0	0.181459150952497	0.0539946177711562	0.185139793907211	53
0	0.350866388659994	0.153651495000206	0.116800896276678	91														0	0.358692610032457	0.202287889450225	0.0675194990927942	55
0	0.349993938251623	0.215802981239906	0.110808423143483	95														0	-0.0403716167769186	0.0141074712414347	0.0133370076425613	42
0	0.153096194835271	0.0422718301844338	0.023731834893671	71														0	-0.424903209693078	0.00168075454110991	0.000401435375668567	0
0	0.405286374433791	0.131749327766267	0.466480371985691	87														0	0.21354862731248	0.112956895471876	0.00339524029746722	75
0	0.388571491582248	0.134000000739078	0.0108674116293355	92														0	0.171185679125779	0.0774209750416295	0.062417320509396	61
0	0.230258487583285	0.146845964600838	0.0193462674940589	78														0	0.112133328990444	0.0591638918934315	0.0155018404558811	54
0	0.466178520810374	0.0902395701355746	0.0214604534608015	81														0	0.215898883293112	0.0297197892163796	0.0897807588825778	52
1	0.317702335836187	0.16824376195148	0.235343616540879	89														0	-0.14184816887862	0.00645429353667306	0.00322654397281126	30
1	0.364473718247677	0.132377492067997	0.111615000775834	74														0	0.131839042763122	0.0612111180091217	0.0457456183646293	55
0	0.289703108596341	0.0804149430174211	0.0589931037481963	87														0	-0.0852576777578862	0.012171231592576	0.0156123283944828	21
0	0.141827174092822	0.0597281894743001	0.0133497242519011	65														0	0.115573397195618	0.0611745196273071	0.0220200205039646	68
0	0.337603501088635	0.0344352830253759	0.966641016414666	44														0	0.12255437985712	0.0486015900525629	0.00965460317541232	76
1	0.385692773382103	0.158060639586867	0.0505226503826802	93														0	0.108089838323499	0.0331523678274069	0.122045810557173	40
0	0.0137530751961215	0.0325121704694787	0.0175022275218688	48														0	0.154061596097763	0.0880433490883277	0.0144123570727834	50
0	0.502682146779926	0.200698461234521	0.743202379474684	80														0	-0.378113530469025	0.00186493350862231	0.00112516931568534	0
0	0.178791432965457	0.080764242511984	0.0588727559355844	64														0	0.35378130039362	0.155087512335374	0.107016464734587	82
0	0.113452551606685	0.102508160812642	0.00856168329282239	77														0	0.298374781022566	0.0948055710602332	0.025895805475766	84
0	0.296466033006261	0.097702826272998	0.164175879894261	73														0	0.181337206002291	0.0882493698984454	0.0591222209555817	60
1	0.296359893107647	0.243450071523494	0.046872348838919	76														0	0.212287193835473	0.0685712107378405	0.0360060687300244	71
0	0.0986991022982116	0.0543968934200918	0.0375865873641373	49														0	0.544144837640433	0.0667970167744722	0.997767040776347	59
0	0.358356408416499	0.252460525640481	0.0786035948385079	83														1	0.73138010847623	0.167171415868226	0.281810424902308	72
0	0.165011271907474	0.0909172402605692	0.0244389894251685	66														0	0.0916557974998541	0.0696917747587947	0.0106713310855996	76
0	0.173908971634149	0.145216139827043	0.0138048821224689	78														0	0.230476025168833	0.098672095258037	0.0793189820726357	75
0	0.206441188993969	0.149960087406638	0.0358569274385406	78														1	0.407846073728721	0.109590538540124	0.847535550789396	61
0	0.271085403680685	0.144706292882331	0.0566329306909374	80														0	0.0390226327939589	0.0506708221225132	0.0106453431973471	53
0	-0.288320540211965	0.00323689404528365	0.00422508057142418	0														0	0.227336435690565	0.00380041828968254	0.0109710393958639	26
0	0.330327330120026	0.311895846097851	0.00534486965405618	94														0	0.159071279433217	0.080186929215029	0.0342183820289348	55
0	0.319159610445879	0.214015252990426	0.0204716970155912	84														0	0.230082148983851	0.137263716505135	0.0455856588357867	67
0	0.0549681158088143	0.0356891492828359	0.00247159750635924	53														0	0.162074120090834	0.0590390380047029	0.0774339753987171	55
0	0.208616877276077	0.15163679755402	0.0200060451694464	68														0	0.102005429208352	0.0889310477402959	0.00876972621698763	69
[truncated: 4,023 more rows]
