# Supplementary material for: Development and evaluation of a machine learning-based in-hospital COVID-19 disease outcome predictor (CODOP): A multicontinental retrospective study
Source: eLife. 2022 May 17;11:e75985. doi: 10.7554/eLife.75985 (PMC9129872; doi:10.7554/eLife.75985)
Supplement: Figure 2—figure supplement 3—source data 1. [file elife-75985-fig2-figsupp3-data1.xlsx]

## Sheet: Klen etal_Fig 2-figsup3_Sdata1
outcome	CODOP	Variant	Vaccines
0	-0.0321191016025654	3	0			Variant 2=Delta
0	0.447010509725079	3	0			Variant 3=Omicron
0	-0.159284427996483	3	0
0	0.114233157375155	3	0			Vaccines 0=no vaccines
0	0.280579543536732	3	0			Vaccines 1=2 vaccines
0	-0.0825227613457251	3	0			Vaccines 2=3 vaccines
0	0.271427994114901	3	0
0	0.234396736012144	3	0
0	0.328079827425905	3	0
1	0.842161934510348	3	0
0	0.260097523071169	3	0
0	0.240414219897914	3	2
0	-0.141494027288162	3	0
0	-0.0913317105463478	3	0
0	0.0624107740335868	3	1
0	-0.151234594652619	3	0
0	-0.0100441441488574	3	0
0	0.021615523158135	3	0
0	0.230002067578624	3	0
1	0.438711261799886	3	0
0	0.247025530016779	3	0
0	0.181501807979937	3	0
0	0.346053838239756	3	0
0	0.140657183544095	3	2
0	0.19912446830309	3	0
0	0.206812031260567	3	0
0	0.208987360895107	3	0
0	-0.0705617805463749	3	0
0	0.246939121917659	3	0
0	0.197053285862726	3	0
1	0.659156659028727	3	0
0	0.39441202248478	3	1
0	0.391304347225632	3	0
0	0.175406617468524	3	0
0	0.849458450187861	3	2
1	0.482230811789656	3	0
0	-0.0363845587502043	3	1
0	0.0490389662258087	3	1
0	0.127276851200435	3	0
0	0.0224557819671119	3	0
0	-0.371869260455222	3	0
0	0.504620671264915	3	0
0	0.405428009256762	3	0
1	0.498813420775883	3	0
0	-0.266919218140053	3	0
0	0.345830980104816	3	2
0	0.161123616237958	3	0
0	0.228425684338059	3	0
0	0.314489446406596	3	2
0	0.239156327817273	3	0
0	0.459342968637027	3	0
0	0.218627678652281	3	0
0	0.421135106685236	3	0
0	0.222392759042525	3	0
1	0.411570839793038	3	0
0	0.199533692200012	3	1
0	0.324606119279892	3	0
0	-0.241175643958608	3	0
0	0.031473847691919	3	0
0	0.377118076718423	3	0
0	0.379527598604101	3	2
0	-0.101381123395318	3	1
0	-0.296703128767626	3	0
0	0.155405289874106	3	1
0	-0.204979786389573	3	0
0	0.402719369733463	3	2
1	0.308822733164079	3	0
0	0.278624090814189	3	0
0	-0.213569908629033	3	0
0	0.0128407076770695	3	2
0	0.0572334336909619	3	0
0	0.149404742295718	3	1
1	0.235419057206583	3	0
0	0.237004466602972	3	0
0	-0.204042787873576	3	0
0	0.00554594042292511	3	0
0	0.314132984782687	3	0
0	-0.159878943730806	3	0
0	0.0225464672931376	3	0
0	0.188462971402173	3	0
0	-0.24904471309974	3	0
0	0.0111543744221223	3	0
0	-0.26276355354527	3	0
1	0.155320800866959	3	2
0	0.402275822751784	3	0
0	0.158773365511175	3	0
1	0.185357388797889	3	0
0	0.11249050837023	3	0
0	-0.0312569738096377	3	0
0	0.078475934433853	3	0
0	0.107870019880459	3	0
0	-0.0140293519716578	3	0
0	0.231528326475645	3	2
0	-0.289245959246906	3	0
0	0.258402852991983	3	0
0	0.188337692299786	3	0
1	0.438840912706217	3	0
0	0.0953829775417209	3	0
0	-0.156118249085347	3	0
1	0.210484886524858	3	2
0	0.417305393640968	3	0
0	0.0701974181295744	3	1
0	0.12508931131938	3	2
0	-0.168348550176267	3	0
0	0.224771595512679	3	2
0	0.070294970506769	3	2
0	0.309411066951273	3	0
0	0.081256307344702	3	1
0	-0.274225730325187	3	0
0	-0.0223803656518672	3	0
0	0.1061530366328	3	0
0	-0.0348101436822725	3	0
0	-0.00204563410916982	3	0
0	-0.177773952284748	3	0
1	0.562083321803075	3	0
0	0.247702773385932	3	0
0	0.34041272813495	3	0
0	0.346643846095051	3	0
0	-0.00735202825469769	3	0
1	0.634405310808976	3	0
0	0.440406648328888	3	2
0	0.372737000476502	3	2
0	0.387947897364156	3	0
0	-0.0539323265715235	3	0
0	0.232625070616933	3	2
0	0.134209132858462	3	0
0	0.163561306429214	3	0
0	0.456706722731452	3	0
0	0.279585166900484	3	0
0	0.230891397637958	3	0
0	0.411748880782344	3	0
0	0.19995976562227	3	0
1	0.450619154362496	3	0
0	-0.18558227325139	3	0
0	0.293871487997506	3	0
0	-0.209188060426332	3	0
0	0.00808052529178025	3	0
0	0.00829422670770939	3	1
1	0.513324044744574	3	0
0	0.0904155444421709	3	0
0	-0.207560641951179	3	0
0	0.246421982604208	3	0
0	-0.126043241431371	3	1
0	0.323162778165902	3	0
0	0.301907405514704	3	0
0	0.226607626115227	3	2
0	-0.291144506429153	3	0
0	0.333798419940559	3	0
0	0.39988908222102	3	0
1	0.813800857372043	3	0
0	0.0187351262970669	3	1
1	0.384588725765736	3	0
0	-0.143220077186052	3	0
0	0.33500207970248	3	0
0	0.454094265288815	3	0
0	0.0555525645257694	3	0
0	-0.215667285770623	3	0
0	0.344387898840846	3	0
0	0.255910204403579	3	0
0	0.0815433957053814	3	0
0	-0.148913404101368	3	0
0	0.139071030744937	3	0
0	0.10580315941175	3	0
0	0.558694291532486	3	0
0	-0.195617858810915	3	1
0	0.0839896016554772	3	0
0	0.085607790419622	3	0
0	-0.354738919790382	3	0
0	0.187272090508145	3	1
1	0.431220719439765	3	0
0	0.0207300791227004	3	0
0	0.332882843034526	3	0
0	0.199385273458465	3	0
0	-0.0594911313434089	3	0
0	0.109161295026264	3	0
0	-0.204207173578137	3	0
0	0.0672074226220634	3	0
0	0.139278843794272	3	1
0	0.39624195482229	3	0
0	0.22106516974599	3	0
0	0.237750691475713	3	2
1	0.409702785059378	3	0
0	0.133693812946421	3	0
0	0.155531388747182	3	2
0	0.506163225582483	3	0
0	-0.0930548249960572	3	0
1	0.314585148297776	3	0
0	0.187998237919403	3	0
0	0.377332750735229	3	2
0	0.137675011047401	3	0
0	0.192375849074639	3	0
0	0.16675857171879	3	2
0	0.232977076680954	3	0
0	0.156536438657908	3	1
0	0.367455543339297	3	0
0	0.280541788941657	3	0
0	-0.0494238290918551	3	0
0	0.334612480556812	3	0
0	0.111948522369062	3	1
0	-0.252171340382302	3	0
0	0.142989039089279	3	0
0	-0.0957447652544845	3	0
0	0.0570517175294109	3	0
0	0.328635245440663	3	1
0	0.00663215247397593	3	0
0	0.282945241234981	3	0
0	-0.0372975765559686	3	0
0	-0.34380862229887	3	0
0	0.262975203038442	3	0
1	0.357403288826592	3	1
0	-0.170359284068193	3	1
0	0.0208204173952483	3	0
0	0.358915898981954	3	0
0	0.0916793981128658	3	1
0	-0.159921664769437	3	0
0	0.218045074678552	3	0
0	0.283247167171061	3	0
0	0.10259745130637	3	0
1	0.522856781084099	3	0
0	-0.0754602897660579	3	0
0	0.113972979952282	3	0
0	0.221438033236928	3	2
0	0.358224666531903	3	0
1	0.413094730631619	3	2
1	0.620022888892269	3	0
0	0.401620843235706	3	1
0	0.18012886073164	3	0
0	-0.073211214362927	3	0
0	0.174830012825601	3	2
0	0.283105260594179	3	0
0	0.19207902384054	3	0
0	-0.108012228780215	3	0
0	0.0377028292536504	3	0
0	0.508622803262636	3	0
0	0.0157244605538612	3	0
0	-0.145357091345343	3	0
0	-0.0280843297116128	3	0
0	0.257945606445883	3	0
0	0.0553666636810458	3	0
0	0.0139323327533518	3	0
0	0.337556653218343	3	0
0	0.228987568944201	3	0
1	0.293943204766372	3	0
0	0.310727838843829	3	2
0	0.133051306395603	3	0
0	0.168455205121323	3	0
0	0.366497333785705	3	0
1	0.3529247147254	3	0
0	0.327061079274087	3	0
1	0.383402002962993	3	2
0	-0.173445508684158	3	0
0	0.141205027767033	3	0
0	0.397171344440929	3	0
0	0.28909976937912	3	0
0	0.191391562378532	3	0
1	0.584652299753111	3	0
0	-0.148234211246763	3	0
0	0.277933340599841	3	0
0	0.299987111542553	3	1
0	0.375943502681777	3	0
1	0.546089401303849	3	2
0	0.0782074357886421	3	0
0	0.194521871977967	3	0
0	0.147261129537023	3	0
0	0.19716131415026	3	0
0	-0.0201445001813224	3	0
0	0.0775127520250988	3	0
0	0.399559668583286	3	0
0	0.294317374203681	3	0
0	0.381793438686805	3	0
0	0.182695401258623	3	0
1	0.731433314766138	3	0
0	0.375202944806611	3	0
0	0.230576325609157	3	0
0	-0.206853783421568	3	0
0	0.439138290156136	3	0
0	0.270595633727282	3	0
0	-0.187957432661567	3	0
0	0.169312559652399	3	2
0	0.224160082047702	3	0
0	-0.111583050738172	3	0
0	0.149943953187903	3	1
0	0.677947692225437	3	0
0	0.400285480808855	3	0
0	0.158042802423176	3	0
0	0.153140758573472	3	0
0	-0.0280440998077999	3	0
0	-0.130167852243918	3	0
0	0.0875639015988998	3	0
0	0.0173847561699259	3	0
1	0.433217239881237	3	0
0	0.0875639015988998	3	0
0	0.0844466675303725	3	0
0	0.328273457545824	3	0
0	0.19563784777235	3	0
0	-0.00821382586756146	3	0
0	0.307028213367908	3	0
1	0.358857376849232	3	0
0	0.294655357722372	3	1
0	0.228368433901335	3	0
0	0.263668545514368	3	0
0	0.103552308613074	3	0
0	0.0909392318765163	3	0
0	0.182432171726465	3	0
0	-0.132778202359968	3	0
0	0.306675110665595	3	0
0	-0.00145001800930213	3	1
0	0.117250911422995	3	0
0	0.542315474599163	3	1
0	0.244424543582227	3	0
0	0.497789668486596	3	0
0	-0.039739132022199	3	0
0	-0.12085763386156	3	0
0	0.612651593433745	3	0
0	0.276886990568237	3	0
0	0.306406651175893	3	2
0	0.0630343503117518	3	1
1	0.451677716515453	3	0
0	0.0634588069813868	3	0
0	0.349082880779176	3	2
0	0.194832435248466	3	0
0	-0.0343474250553823	3	0
0	0.331584234701552	3	0
0	-0.0776024080232925	3	0
0	0.357271003905223	3	0
1	0.550883665909133	3	0
0	0.200247249033268	3	0
0	0.308525723511172	3	0
0	0.0776598276919823	3	2
1	0.30353687657067	3	0
1	0.874748449449844	3	0
0	-0.273091871586747	3	0
0	0.273724511047862	3	0
0	0.0430229114282402	3	2
0	0.384302427057723	3	0
0	0.263617734678886	3	0
0	0.384548489178567	3	0
1	0.580099370479535	3	0
0	0.0548664371468713	3	0
0	-0.0829251870191894	3	1
1	0.984190880845725	3	0
1	0.626062885406658	3	0
0	0.169421499897147	3	2
0	0.436198731816152	3	0
1	0.475749733554555	3	0
0	0.138466012460229	3	1
0	0.491393867363409	3	0
1	0.283483226870411	3	0
1	0.199212566381788	3	0
1	0.326622334292099	3	0
0	-0.275154199946336	3	2
0	0.36128224966346	3	0
0	0.0114339936648223	3	0
0	0.0648830863075838	3	0
0	-0.0857508348715688	3	0
0	0.14677279391448	3	0
0	0.259250062783204	3	0
0	0.467919560982244	3	0
0	0.15421579203501	3	0
0	0.118467296827451	3	0
0	0.21871048562063	3	1
1	0.314758310530644	3	0
1	0.491095209038725	3	0
0	0.291446067974098	3	1
0	0.151821400500908	3	1
0	0.188072665198571	3	2
0	0.558853881414237	3	0
0	0.226266994597209	3	0
0	0.564987658204498	3	0
0	0.231455453195441	3	0
0	0.200361594686655	3	2
0	0.319008799971691	3	0
0	0.334506550968397	3	0
0	0.0839857926723067	3	2
0	0.00862299811683119	3	0
0	0.00494075833466754	3	0
0	-0.0556448589296631	3	2
0	-0.339357726499033	3	0
0	-0.0948167941691779	3	0
0	-0.45169653317901	3	0
0	0.0740521286654751	3	1
0	0.0849468679480776	3	0
0	0.297872962079161	3	0
0	-0.166094399644717	3	0
0	0.281508550053461	3	0
0	0.33110713009213	3	0
1	0.345339530850188	3	0
0	0.322992837495804	3	0
1	0.418557497296459	3	0
1	0.12232267249545	3	0
0	0.524385191628148	3	0
0	-0.12556379296778	3	0
0	0.383119719952513	3	0
0	0.176971150668831	3	1
0	0.0183988847686646	3	2
0	-0.295467157326563	3	0
0	0.0397595070036155	3	0
0	0.0364109526684232	3	0
0	-0.23852187691084	3	0
0	0.391973730613371	3	2
1	0.313308336608726	3	0
0	-0.229301763143065	3	0
0	0.15375103406152	3	0
0	0.0237171396921095	3	0
0	0.214374907249448	3	0
0	0.452079177298656	3	0
0	0.616969933861086	3	2
0	0.234287848286379	3	2
0	0.416442512550764	3	0
0	0.371630264340799	3	0
0	0.106879778325029	3	0
1	0.442794000695513	3	0
0	-0.0628277614909715	3	0
1	0.670863049673647	3	0
1	0.395372175769107	3	0
0	0.406586962078089	3	0
0	-0.136669650011013	3	0
0	-0.330314795929861	3	0
0	0.0709402890365941	3	1
0	0.256685615996496	3	0
1	0.204641129943308	3	0
0	0.231288186855977	3	0
0	-0.165017621610824	3	0
0	0.842386952887961	3	2
0	0.282571280212303	3	0
0	-0.0125005649192417	3	1
0	0.0630880260603434	3	0
0	0.286032663702009	3	2
0	0.200545360797118	3	0
0	-0.0283465523551572	3	0
0	0.291809571766955	3	0
1	0.331875866999308	3	0
0	-0.13873234745154	3	0
0	0.119980674753468	3	0
0	-0.00424840255028549	3	0
0	0.382696842996772	3	0
1	0.404182400814393	3	0
0	0.053346861905712	3	2
1	0.637092230473826	3	0
0	-0.140744284212946	3	0
0	0.275441419648388	3	0
0	-0.210700408908292	3	0
0	0.329259689118562	3	0
0	0.322503146391013	3	0
0	0.314097592910961	3	0
0	-0.0983777812660633	3	0
0	0.00969150519647686	3	0
0	-0.315255031725864	3	0
0	-0.016906101801473	3	0
0	0.298163500626967	3	0
0	-0.0799503697442175	3	0
0	0.191495440479183	3	0
0	0.521745539547146	3	1
0	0.177769233937877	3	0
0	-0.152258066631894	3	0
1	0.688096705539351	3	2
0	0.603035950705302	3	0
0	0.288923584696321	3	0
0	0.404457188260395	3	0
0	0.261482591446249	3	2
0	0.638002662625459	3	0
0	-0.0991329841721615	3	0
0	0.0905829114053184	3	0
0	0.470179284031101	3	0
0	0.356900235486641	3	0
0	0.386998662204465	3	0
0	0.140908963490104	3	0
0	0.0171797633491952	3	0
0	0.297602736148374	3	1
0	0.294460723782084	3	0
0	-0.0914345583531109	3	0
0	0.262746071881728	3	0
0	0.0728168525917667	3	0
0	0.171782618608625	3	0
0	0.361169756066962	3	0
1	0.358281528321976	3	0
0	0.224237519022309	3	0
0	0.388967094715108	3	2
0	0.381649674804924	3	0
0	0.27209010060594	3	0
0	-0.402488252129259	3	0
0	0.227622602645496	3	0
0	0.129570650155111	3	0
0	-0.0880083536254727	3	0
0	0.166927285150678	3	0
1	0.13746188430427	3	1
0	0.716723237400506	3	0
0	0.345262246065721	3	0
0	-0.00653336384368166	3	1
0	0.343264387958374	3	0
0	-0.351100258052418	3	0
0	0.0315969571108617	3	2
1	0.56854987768271	3	1
0	-0.104392667724811	3	0
0	-0.00541554105266763	3	1
0	0.503853296986778	3	0
0	0.202002453388612	3	0
0	0.076638593831406	3	0
1	0.596435339669887	3	0
0	0.522630075933576	3	0
0	0.359365700410632	3	0
0	0.181359475989364	3	1
1	0.377218426299995	3	0
0	0.14308723707585	3	1
0	-0.346606711651727	3	0
0	-0.075673991181987	3	0
0	0.24892083186313	3	0
0	-0.172628847835935	3	0
0	0.361621190556499	3	0
1	0.553047640479781	3	0
0	0.110393298016986	3	2
1	0.150010633026658	3	0
0	0.205280603015595	3	0
0	-0.177495699119761	3	0
1	0.220019480456325	3	2
0	0.107180804563649	3	1
0	0.323654828273641	3	0
0	0.336212192689638	3	0
0	0.423190785545773	3	0
0	0.243139131647787	3	0
0	0.068451788820736	3	0
0	0.586294667360789	3	0
0	0.135851754351521	3	2
0	0.0770927595319087	3	0
0	0.366983287897318	3	0
0	0.0697812146260056	3	1
0	0.482384614001638	3	0
0	0.299361922236691	3	0
0	0.221014134369904	3	0
0	-0.0223715044863005	3	1
0	-0.203518036527502	3	0
0	0.197994647608213	3	0
1	0.133397388197578	3	0
0	0.378935592042406	3	1
0	-0.0381596276849581	3	0
0	0.266379791915905	3	0
0	0.266216835873588	3	0
0	-0.196826255443354	3	0
0	0.233013347279298	3	0
0	-0.12003509678671	3	0
0	0.232165051611498	3	2
0	-0.114705361281411	3	0
0	0.405316025606761	3	1
0	0.385179036759698	3	0
0	0.23963467986492	3	0
1	0.207773276347426	3	0
0	-0.205750617318317	3	2
0	0.416412039675735	3	0
0	0.369203502905701	3	0
0	0.246486331244425	3	2
0	-0.112485048805968	3	0
1	0.465778941168671	3	0
0	0.149335921398385	3	1
0	0.334774202410942	3	0
1	0.490952402741294	3	0
0	0.465680085351764	3	0
0	0.378393894314785	3	0
0	0.441282758080551	3	0
0	0.0213806163818989	3	0
0	0.18519476311614	3	2
0	0.0846628482246156	3	1
0	0.239108429153573	3	1
0	0.119123142749417	3	0
0	0.289932814953904	3	0
0	0.0483702676654057	3	0
0	0.228048307404565	3	0
0	0.0955020514016173	3	0
0	0.247499963806957	3	0
0	-0.0292021525026268	3	0
0	0.356639582921344	3	0
0	0.344838139665044	3	0
0	0.371061942855516	3	0
0	0.234419167228549	3	0
0	0.196805415047446	3	0
0	-0.146507791277269	3	0
0	-0.210223690365065	3	0
0	0.415433189307438	3	1
0	0.312020487604479	3	1
0	0.264608096281561	3	0
0	0.293285592633181	3	0
0	0.289097143854749	3	1
0	0.235267502211863	3	0
0	0.25866134344749	3	0
0	-0.116863343056963	3	1
0	0.40541280932533	3	0
0	0.362526894373833	3	0
0	0.19969940559507	3	0
0	0.045692506647118	3	0
0	-0.0164828383672366	3	0
0	-0.239518151655151	3	0
0	0.314339577690051	3	2
0	0.117463487256677	3	0
0	0.00588701253629432	3	0
0	0.214954146424514	3	1
0	-0.177264356600609	3	0
0	-0.209845603244575	3	0
0	-0.222308364584665	3	0
0	0.413788229162145	3	0
0	0.527439168106527	3	0
0	0.223724714024503	3	2
0	0.347201702736808	3	2
0	0.336113812281614	3	0
0	0.300566443692601	3	0
0	-0.0815188332023064	3	0
0	0.171027874319514	3	0
0	0.282719965599931	3	2
0	0.165205126602302	3	0
0	0.313092552277979	3	0
0	0.111619713259455	3	0
0	0.236835880849362	3	0
0	0.04449672135999	3	0
0	0.290207007859543	3	0
0	0.28452073450406	3	0
0	0.101246884243324	3	2
0	0.0269880327816603	3	0
0	-0.0914338027864678	3	0
0	0.0948263092706882	3	2
0	0.334812532468397	3	0
1	0.485192939782852	3	0
0	0.163714975172195	3	0
0	0.269330341452595	3	0
0	0.0804082421481841	3	0
0	0.0521852098254639	3	0
0	0.106761494496698	3	0
0	0.00347772556407576	3	0
0	0.504857313895986	3	0
0	-0.113334445977186	3	0
1	0.192999749152327	3	0
1	0.47482783981651	3	0
0	0.234200674942571	3	0
0	0.398993523400885	3	0
0	0.149187240358404	3	2
0	-0.262562754125651	3	0
0	0.374705733944744	3	0
0	-0.169666201531326	3	1
0	0.051767233066793	3	0
0	0.38590560811104	3	0
0	0.478587806190672	3	0
1	0.291041241371474	3	0
0	-0.120015267917189	3	0
0	0.291638051850463	3	0
0	0.0383506594796548	3	0
0	-0.211467388821114	3	0
0	-0.0130430377442924	3	1
0	0.205444243781027	3	0
0	0.108579916476767	3	2
0	-0.0418434131833582	3	1
0	-0.210700408908292	3	0
0	0.310345644125066	3	0
0	0.0467643878399603	3	0
0	0.700524000724129	3	2
0	0.234726141356668	3	1
0	0.280073018356551	3	0
0	-0.209368884701349	3	0
0	0.337776360068772	3	0
0	0.0853349981415573	3	0
0	0.230672410737436	3	0
1	0.0562478776580761	3	0
0	0.125014366401733	3	1
0	0.528553427391569	3	0
0	0.296153508949887	3	0
0	-0.0925851091608703	3	1
0	-0.24796462582122	3	0
0	0.152026397814523	3	0
0	0.338058215080935	3	0
0	0.37134170049782	3	2
0	0.148703241099953	3	0
0	-0.0888468603695713	3	0
0	0.333034986282484	3	0
0	-0.110162111998859	3	0
0	0.194393427391512	3	0
0	-0.179536894942457	3	0
0	0.273634575561972	3	0
0	0.143380579140941	3	0
0	0.263975120526742	3	0
0	-0.316163888458208	3	0
0	0.0291054569051167	3	0
0	0.118342448247387	3	2
1	0.759349999822509	3	0
0	0.293896919581762	3	0
0	-0.244991100542015	3	0
0	0.227313631277375	3	0
0	-0.27590987260014	3	0
0	0.318052645287314	3	1
0	0.146078442302381	3	0
0	0.387078675182775	3	0
0	0.244962440105568	3	0
0	-0.101407262732716	3	0
0	-0.206623643435182	3	0
0	-0.0704765702024235	3	0
0	-0.160432802857613	3	0
0	0.453684170287226	3	0
0	-0.0451475658450319	3	0
0	0.356276810463705	3	0
0	-0.0559810663969246	3	0
0	0.0347162786513893	3	0
0	-0.156294833695536	3	0
0	-0.260591441759846	3	0
0	0.24290781578686	3	2
0	0.00533528402561366	3	0
0	-0.0919576862448274	3	0
0	0.118307029462839	3	0
0	-0.0165280146809831	3	0
0	0.318130810469032	3	0
0	0.226376896730861	3	2
0	0.30679480924514	3	0
1	0.511760598540398	3	0
0	0.14011329280182	3	0
0	-0.34062139520621	3	0
0	-0.0220897004202441	3	0
0	0.0248149900160778	3	0
0	0.579508041933447	3	0
0	-0.191460769844527	3	0
1	0.728562239746575	3	0
0	0.0273136527254031	3	0
1	0.443400124179423	3	0
0	0.111320755679759	3	0
0	-0.0257552837419937	3	0
0	0.0170395461903482	3	0
0	0.186955032143394	3	2
0	0.288073329746203	3	0
0	-0.0441784906594705	3	0
0	0.173284981134712	3	0
0	0.330249430513045	3	0
0	0.262428625366298	3	0
0	0.414693584177671	3	0
0	0.265828401829031	3	0
1	0.391089652093098	3	0
0	0.322547068180548	3	0
1	0.418370726836622	3	0
0	0.289295330665292	3	0
1	0.270359707066617	3	0
0	0.155643527398461	3	0
0	0.0747735544440244	3	0
0	-0.131741858599313	3	1
0	-0.00722551733088643	3	0
0	-0.00357718901193567	3	0
0	0.497723308644007	3	0
0	-0.051665947484021	3	0
0	0.326112525241996	3	0
0	0.0933164580958613	3	2
0	-0.00246795380734234	3	0
0	-0.0780411453276637	3	0
0	0.0140650240333577	3	0
0	0.165091086657583	3	0
0	0.0265454293820791	3	2
0	-0.193407032788488	3	0
0	-0.2092373761377	3	0
0	0.0716115692631094	3	0
0	0.111006148930572	3	0
1	0.273835616433624	3	0
0	0.15951869096449	3	0
0	0.207817412334537	3	2
0	0.223391838145571	3	1
0	0.168400194729855	3	0
1	0.336694793357978	3	0
0	0.5688741337211	3	0
0	-0.011267672135035	3	0
1	0.486311241504497	3	0
0	0.0873911539248951	3	0
0	0.0552827919278636	3	0
0	-0.010530692196807	3	0
1	0.387225840025132	3	0
1	0.338700162597175	3	0
0	0.133586479331811	3	0
0	0.282302164565407	3	0
0	0.307883719200496	3	0
0	-0.345753685440498	3	0
1	0.179468304999228	3	0
0	0.437126108150043	3	0
0	0.324453810578765	3	0
0	0.329720723347721	3	0
0	0.196516451638859	3	0
1	0.447372135538032	3	2
0	0.242657130936883	3	0
0	0.365695181409699	3	0
0	0.175591173393813	3	0
1	0.488704376894288	3	0
0	0.220338492246658	3	0
0	-0.344524892658447	3	0
0	-0.0428569496573116	3	0
0	-0.372790191314474	3	0
1	0.81230285976631	3	0
0	0.488820135928169	3	0
0	0.178278110106565	3	0
0	0.505655387583231	3	0
0	0.00183181256303131	3	1
0	0.094634700190362	3	0
0	0.324852702390519	3	0
0	0.265402518432654	3	0
0	0.125274659311326	3	0
0	0.306810992013375	3	0
0	0.10502168641263	3	0
0	0.297458571539917	3	0
0	0.176975345871124	3	0
0	-0.207757904796652	3	0
0	0.0862325890501241	3	0
0	-0.0555860580846477	3	0
0	0.0141586734385641	3	0
0	-0.209960673237768	3	0
0	0.402423703580124	3	1
1	0.266051920192333	3	0
0	-0.275539791654707	3	0
0	-0.0536463067708293	3	0
0	-0.00558088510411536	3	0
0	0.157109006965773	3	0
0	0.225735278718096	3	0
0	0.0914268984911049	3	0
0	0.230780099108568	3	0
0	0.0183684835715672	3	0
0	-0.127460005496895	3	0
0	0.0626776578243363	3	0
0	0.323794819905941	3	2
0	0.0685613901102778	3	0
0	0.469968610185483	3	0
0	-0.378352428212668	3	0
0	0.314148739213144	3	0
0	0.279317614233185	3	0
0	0.131529083974745	3	0
0	0.404500560868005	3	0
0	0.252690455276634	3	0
0	0.353988560847755	3	0
0	0.246980769423792	3	0
0	0.211599448821803	3	0
0	-0.226108677058463	3	0
0	0.0269026884640008	3	0
0	0.289034982193898	3	0
0	0.326576708082381	3	0
0	-0.331020215587299	3	0
0	0.156759269456758	3	0
0	0.0198585755189094	3	0
0	-0.278268682711744	3	0
1	0.26113138775688	3	1
0	0.415827588199121	3	0
0	0.246549232381916	3	0
0	0.38534316554004	3	0
0	-0.0324582187159218	3	0
0	-0.0353147266782135	3	0
0	0.429981224912582	3	0
0	0.294658101843259	3	0
0	0.267873100244166	3	0
0	0.202781120238696	3	0
0	-0.0490177897075724	3	1
0	-0.119170448608795	3	0
0	0.00796545529858781	3	0
0	0.378638024060684	3	0
0	-0.390097722668686	3	0
0	0.289985611841626	3	0
0	0.246444561829457	3	0
0	0.376998204793167	3	2
0	0.207518343418753	3	0
0	0.328702385698573	3	0
1	0.300963011902182	3	0
0	0.31112632719324	3	0
0	-0.0394120550325427	3	0
0	0.282405387330434	3	0
0	0.254233050614886	3	0
0	0.289257655605673	3	0
1	0.220864049815929	3	0
0	-0.0848359812382764	3	0
0	0.39964624399838	3	0
0	0.241279537236087	3	0
0	0.208034390759283	3	0
0	0.0864946729776388	3	0
0	0.086687657478203	3	0
0	0.0379494078104919	3	0
0	0.171546590981315	3	0
0	-0.0439968659131057	3	0
0	0.237230780464461	3	1
0	0.250707037019308	3	0
0	0.312997171629132	3	0
0	-0.316115419302798	3	0
0	0.290261467217324	3	0
0	0.288740476719027	3	0
0	0.0953980306558363	3	0
0	-0.149234172500712	3	0
1	0.414887841297438	3	0
0	0.252317975985421	3	0
1	0.260134666791586	3	0
0	0.189386454067695	3	0
0	0.179789607097093	3	2
0	-0.393044579274007	3	0
0	0.119156097940779	3	0
0	0.579296622894651	3	0
0	-0.0260552302903798	3	1
1	0.0519516015296158	3	0
0	0.0309101060054507	3	0
0	0.325040689572767	3	0
0	-0.155089749956765	3	0
0	0.341650387314132	3	0
0	0.162325804580917	3	0
0	0.129757704685124	3	0
0	0.125772789487355	3	1
0	0.355879851432659	3	0
0	-0.419989139181405	3	0
0	0.299961465220491	3	0
0	-0.119301485446207	3	0
0	-0.175036387714447	3	0
0	-0.0497192716495885	3	0
0	-0.225932228390203	3	0
1	0.496141239942475	3	0
0	0.132550973011152	3	0
0	0.307438277226773	3	0
0	0.219604308158051	3	0
0	0.504562193724919	3	0
0	0.539546558043428	3	0
0	0.41642157731356	3	0
0	0.0366735216742542	3	0
0	0.179985089597017	3	0
0	0.378521794278591	3	0
0	-0.0106218793791585	3	1
0	0.181924554900314	3	0
0	0.0906263853525949	3	0
0	0.435574351060259	3	0
0	0.379012921632608	3	0
0	0.304250463977149	3	0
0	-0.202810758295098	3	0
0	0.274537456168193	3	0
1	0.31065156887522	3	0
0	0.181905768221205	3	0
1	0.431606234883564	3	0
1	0.378259553691725	3	0
0	0.147783343366771	3	1
0	0.163010922622673	3	0
0	-0.163575733822609	3	0
0	0.299536901444562	3	0
1	0.483996478518167	3	0
0	0.196287144663698	3	0
0	0.339878775133428	3	0
0	0.175260555186265	3	0
0	0.335689154146393	3	0
0	0.311398226350549	3	0
0	0.290480844803607	3	0
0	-0.166341252065344	3	0
0	-0.162847226082133	3	0
0	0.0516185087714451	3	0
0	0.220223901812973	3	0
0	0.161491784322371	3	0
0	0.289675852000135	3	1
0	0.211091130832636	3	0
0	-0.156562305327394	3	0
0	-0.212410607958624	3	0
0	0.0200555650300201	3	0
0	-0.323696122375983	3	0
0	0.374090370879066	3	0
0	0.343598230014501	3	0
1	0.293036940595747	3	0
0	0.40544336414068	3	0
0	-0.212927417618306	3	0
0	0.191346188264534	3	0
0	0.281256160398647	3	0
0	0.133749831414556	3	2
0	-0.116815397138566	3	0
0	0.343191841375096	3	0
0	-0.043629968566768	3	0
1	0.382983797190016	3	0
0	-0.198584449975513	3	0
0	0.256200963503672	3	0
1	0.533402915956195	3	0
1	0.209109408175972	3	0
0	0.266145430395729	3	0
0	-0.0304368607783656	3	0
0	0.262220196344533	3	0
0	-0.321397249548627	3	0
1	0.467821349235679	3	0
0	-0.112248891005962	3	1
0	0.213097787790629	3	2
0	0.437819814584788	3	0
0	-0.13774204231556	3	0
0	0.146044546496598	3	0
0	0.129121128876857	3	0
0	-0.133982857730576	3	0
1	0.0982070709247103	3	0
0	-0.0467841110192964	3	0
0	0.263904528463562	3	0
1	0.454373218882098	3	0
0	0.581766551456928	3	0
0	0.455768772194361	3	0
0	0.378026595461965	3	0
0	0.645212419397791	3	0
0	0.32603299803812	3	0
0	-0.266188016322383	3	0
0	-0.0426653417061626	3	0
0	0.262607769752269	3	0
0	0.237818314593016	3	0
0	0.395104619844747	3	2
0	-0.152310606648268	3	0
0	0.438463527599526	3	0
0	0.334591759103968	3	0
0	0.0376676811378827	3	1
0	1.69163493379849	2	0
0	0.160424272561687	2	0
0	0.224377017419704	2	0
0	0.307001350730527	2	0
0	0.362724937754936	2	0
0	0.132122890656495	2	2
0	0.412375552813646	2	2
0	0.121767949675292	2	0
0	0.346192711962437	2	0
1	0.22597738191141	2	0
0	0.123955981247274	2	1
0	0.148169810864394	2	0
0	0.391631492139006	2	0
0	0.0415386630747398	2	0
0	0.182961048745293	2	0
0	-0.157896058067312	2	0
0	-0.174711131886635	2	0
0	0.34438486393767	2	1
0	0.263248361188827	2	0
1	0.455433492012765	2	0
0	0.0718304069196385	2	0
0	0.130143252769884	2	1
0	-0.0297894558739764	2	0
0	0.294853168436715	2	0
0	-0.0112911973606158	2	0
0	0.0558882521436539	2	0
0	0.357361596314091	2	2
0	0.0666705628677713	2	0
0	0.367880451523286	2	0
0	0.277567568319945	2	0
0	0.254529904922285	2	0
0	0.356584583121249	2	0
0	0.479902560263689	2	0
0	0.385344025522072	2	2
0	0.107018435009096	2	0
0	0.0526420545588612	2	0
0	-0.113738004644715	2	0
0	0.330736024635042	2	0
0	0.257905865415845	2	0
0	0.248574071946433	2	0
0	0.0302439373255469	2	0
0	0.263240294295806	2	0
0	0.387756625196928	2	0
0	0.233455690735582	2	0
0	0.365687236409206	2	0
0	0.259719096730821	2	0
0	0.224412228058996	2	0
0	0.302841246914097	2	0
0	0.367543391640295	2	0
0	0.24029809247529	2	0
0	0.978468479982426	2	0
0	-0.0674357271564488	2	0
0	0.302317622937561	2	1
1	0.354098489712164	2	0
0	0.0912567899556422	2	0
1	0.272737645701456	2	0
0	0.151608738177663	2	0
0	0.428503609688109	2	0
0	0.00701591649424333	2	0
1	0.327238613395146	2	0
0	0.328043523292615	2	0
0	0.260137724929565	2	0
0	0.20667385825767	2	0
0	0.24342811065336	2	0
0	0.261719413226102	2	0
0	-0.221257337106843	2	0
0	0.218946923857615	2	0
0	0.131572720217545	2	2
0	-0.0621777896040906	2	0
0	0.0340253430304955	2	0
0	0.10214306385359	2	0
0	0.339950841799534	2	1
0	-0.0205224317772042	2	0
0	0.268181543986345	2	2
0	0.260162597936986	2	0
0	-0.051774530712896	2	0
1	0.362806941432736	2	0
0	0.0309794539371105	2	1
1	0.212969689175228	2	0
0	-0.0428132888402674	2	0
0	0.166107244803681	2	0
0	0.324455325273479	2	1
1	0.489172583188834	2	0
0	0.228838450194674	2	0
0	0.182915438976818	2	0
0	0.0679445422145897	2	0
0	0.440845872416925	2	0
1	0.608980800464304	2	0
0	0.318719776997375	2	0
0	-0.0324908616994495	2	0
0	-0.248530427915171	2	0
0	0.192891467815879	2	2
0	0.211557337119382	2	0
1	0.274276409064809	2	2
0	0.18575370700379	2	0
0	-0.228532849167663	2	0
1	0.485242303175607	2	0
0	-0.0454328172251863	2	0
0	-0.210813688560109	2	0
0	-0.0221634600511262	2	0
0	-0.00664069917231637	2	0
0	0.40122234307054	2	0
0	0.307428472068389	2	0
0	0.169195990981565	2	0
0	-0.409664190019338	2	0
0	-0.0805445794680716	2	0
0	0.250109665284802	2	0
0	0.160930894629546	2	0
0	0.191431305459941	2	0
0	0.226887526020472	2	0
0	-0.185227726768878	2	0
0	0.413320138211768	2	0
0	0.0639782435778925	2	0
1	0.318017831629463	2	1
0	0.337737164644385	2	0
0	0.270253675790177	2	0
0	0.231252322716338	2	0
0	0.220059984588141	2	0
0	0.0822949382569907	2	0
0	-0.0412879464916896	2	0
0	0.0716765473975329	2	0
0	-0.110962319108235	2	0
0	0.425002759707705	2	0
0	0.866149128759446	2	0
0	0.0150434160579378	2	0
1	0.379099163712022	2	0
0	0.485510408902141	2	0
0	0.698354868511292	2	0
0	-0.168793233751737	2	0
0	0.269104213629184	2	0
0	-0.0302638935486795	2	0
0	0.165174583488401	2	0
0	0.123799385664744	2	0
0	0.314911829297828	2	0
0	0.251083371066917	2	0
0	0.321514744617356	2	0
0	0.285153891999624	2	0
1	0.466227999324228	2	0
0	0.173329535389347	2	0
0	0.0445840662905586	2	0
0	0.531497464548721	2	1
0	-0.0315261783993984	2	0
0	0.436222295014934	2	0
0	0.246303758392463	2	0
0	0.544299560736783	2	0
0	-0.0236721604675608	2	0
0	0.198357471335508	2	1
0	0.336638348424433	2	0
0	-0.114850734983522	2	0
1	0.446569377077123	2	0
0	0.414187494737806	2	0
0	0.125699414211302	2	0
0	0.392819402717773	2	0
0	0.33113447707721	2	0
0	0.3144695532887	2	0
0	0.0294747031716732	2	0
0	0.15052019099726	2	0
0	0.304184939592116	2	0
0	0.183438309071808	2	1
1	0.0532081213722196	2	0
0	0.253911842750924	2	0
0	-0.0948198185117085	2	0
0	0.455224827600293	2	0
0	0.094571181494751	2	0
0	0.108913473941965	2	1
0	-0.236217327047575	2	0
0	0.238249486921402	2	0
0	0.229739793980253	2	0
0	0.336095031161852	2	0
0	0.139556043330576	2	1
0	0.292471701099109	2	0
0	0.151616376209696	2	0
0	-0.117717061091028	2	0
0	0.382297141123627	2	0
1	0.413599717510563	2	0
0	0.348368448723385	2	1
1	0.509712937897889	2	0
0	0.173518298361848	2	0
0	-0.0190785564729175	2	1
0	0.0275437927117882	2	0
0	0.0702818696080732	2	1
0	-0.0528894686760166	2	0
0	0.21907582166837	2	1
0	0.269111755643678	2	0
0	0.184915442714866	2	0
0	0.296314732143362	2	0
0	0.144431564112134	2	0
0	0.20367446430522	2	0
0	0.0804544608416753	2	0
0	0.171346713442227	2	0
0	0.203357214134465	2	0
0	-0.177169833546704	2	0
0	0.264626924695449	2	0
0	0.380515745842544	2	0
0	0.228557439153459	2	0
0	0.252205560952552	2	0
0	0.291495902264339	2	0
1	0.20659660362241	2	1
0	0.283066079357645	2	0
0	0.289831094759336	2	0
0	0.406469614963484	2	1
0	-0.126871580657453	2	0
0	0.232470626949798	2	0
0	-0.0880007138751511	2	0
0	0.428998539827097	2	0
1	0.447239945217195	2	0
0	0.316022142901197	2	0
0	0.0468596594931335	2	0
0	0.151554600439023	2	0
0	0.114878109313649	2	0
0	0.529036167955348	2	0
0	0.374789890617884	2	0
1	0.334562972552851	2	0
0	-0.138101494096328	2	1
0	0.0100938137057019	2	0
0	0.0487905399961224	2	0
0	0.424008104810209	2	0
0	0.305171346917006	2	0
0	-0.108374011693736	2	0
0	-0.0648632633462548	2	0
0	-0.0782714130176228	2	0
0	0.301224047816877	2	1
0	0.214841607759665	2	0
1	0.420128880818278	2	0
0	0.403816030916504	2	0
0	0.612817716176509	2	0
0	0.176461133323056	2	0
0	0.314498473744105	2	0
0	0.0969126253630693	2	0
0	0.150249472579322	2	0
0	-0.0719204644850965	2	0
0	0.0387548977628401	2	0
0	0.0361904807716905	2	0
0	0.0591748574378932	2	1
0	0.304279446678329	2	0
0	0.138494876813756	2	0
0	0.0398639197495897	2	0
0	0.274066096408031	2	0
0	0.202037933962846	2	0
0	-0.0690446247094197	2	0
0	-0.216562322578294	2	0
0	0.0618732399556417	2	0
0	0.219955582320483	2	0
0	0.10457474619717	2	0
1	0.211333248934305	2	0
0	0.285172322544655	2	0
1	0.319171180751214	2	0
0	-0.000110201304897546	2	0
0	0.325987537864202	2	1
0	0.164376686490191	2	0
0	0.131561528686937	2	0
0	-0.0473710724096621	2	0
0	0.291750172480882	2	0
0	0.358565236761141	2	0
0	0.192699751136438	2	0
1	0.395162662254658	2	0
1	0.407064597221869	2	0
0	0.214874292150625	2	0
0	0.198895420949508	2	0
0	0.350356425812554	2	1
0	0.368133521579512	2	0
0	-0.0494673415681528	2	1
1	0.425502604655979	2	0
0	0.518768131153285	2	0
0	0.27920471741871	2	0
0	0.0866517383336126	2	0
1	-0.0392637919004519	2	0
0	0.212994183405935	2	0
0	0.310720266921223	2	0
0	0.0985174574881778	2	0
0	0.258785824216415	2	0
0	0.317755100560102	2	0
1	0.237518686652679	2	0
0	0.168615013343604	2	0
0	0.293515590662272	2	0
0	0.238864335722693	2	0
0	0.0235303306859005	2	0
0	-0.0450532363303556	2	1
0	0.0302837744056363	2	0
0	0.274210123296256	2	0
0	-0.0554106071282906	2	0
0	-0.196876908808959	2	0
0	0.417485184965056	2	0
0	-0.339662611011107	2	0
0	0.226044078485875	2	1
0	0.193400739176013	2	0
0	0.250511276131813	2	0
0	0.481426318802692	2	0
0	0.162407807753812	2	0
0	0.0687677123875594	2	0
0	0.261625232659882	2	0
0	-0.261216260120407	2	0
1	0.30842127511595	2	0
1	0.280074893554207	2	0
0	0.508850039083931	2	0
0	0.172256190497213	2	0
0	0.297946465306481	2	0
0	0.201866126755635	2	0
0	0.408801913391289	2	0
0	0.0598779114054103	2	0
0	0.272933387727503	2	0
0	0.395060049185828	2	0
1	0.265784747174987	2	1
1	0.30101433420104	2	0
0	0.522033310778714	2	0
0	0.297373380284986	2	0
0	0.553149915062112	2	0
0	0.276202587936431	2	0
0	-0.0434312323015951	2	1
0	0.419310216810417	2	0
0	0.0757841348137572	2	0
0	-0.0447984094398536	2	0
0	-0.0667771013057952	2	0
0	0.153966624917271	2	0
0	0.432003704595233	2	0
0	0.128048379271921	2	0
0	0.280872890755038	2	0
0	-0.123681564901763	2	0
0	0.37024428764647	2	0
0	0.266228349826539	2	0
0	0.107603386525239	2	0
0	-0.0169117443350694	2	0
0	0.256086249287284	2	0
0	0.0473756141223668	2	0
0	0.0185565744227085	2	0
1	0.375731711827557	2	0
0	0.220682718218598	2	0
0	0.372288612209694	2	0
0	0.0386365409784613	2	0
0	0.431360444777838	2	0
0	0.289407884982778	2	0
0	0.0740219818869909	2	0
1	0.0360000611555716	2	0
0	0.213000254464587	2	0
0	0.196752808482617	2	0
0	0.0152211015020681	2	0
0	0.292822812907218	2	0
0	0.198552038057936	2	0
1	0.291307964992879	2	0
0	-0.383574950871305	2	0
0	0.23206331277268	2	0
0	0.00248121349034148	2	0
0	-0.06423274614455	2	0
0	-0.148835110346192	2	0
0	0.33400971035112	2	0
0	0.234675147385897	2	0
0	0.33481964677821	2	0
0	-0.119172718392989	2	0
0	-0.071464858446035	2	0
0	0.477648549874372	2	0
1	0.38408114141795	2	0
1	0.415618425493587	2	0
0	0.274016207181034	2	0
1	0.478386460200612	2	0
0	0.26984583027537	2	0
0	0.0472884825547636	2	1
0	0.391988419627068	2	0
0	0.231338373248094	2	0
0	0.137892425676069	2	0
0	0.235573845569615	2	0
0	0.324623277393114	2	0
0	0.373782141623055	2	0
0	0.149547939116732	2	0
0	-0.112929558192547	2	0
0	0.45072856638099	2	0
0	0.269406685609235	2	0
0	0.250325573180961	2	0
0	0.296659915225482	2	0
0	-0.248865591991054	2	0
0	0.194245519816282	2	0
0	0.427546940677891	2	0
0	0.0441526073914907	2	0
0	0.172968819333971	2	1
0	-0.00297739214796211	2	0
0	0.151462580715791	2	0
0	0.365954659314568	2	0
0	0.326050758533122	2	0
0	0.20316888883067	2	0
1	0.479054394808583	2	0
0	0.11159497545507	2	0
0	-0.314414053873291	2	0
0	0.171096324214094	2	0
0	0.396827982232837	2	0
0	0.459618441481675	2	0
0	0.413309666821778	2	0
0	0.372827063042253	2	0
0	0.247209735199922	2	0
0	0.306950215712574	2	0
0	0.11061622411153	2	0
0	-0.0736704819740608	2	0
1	0.139339709810107	2	1
0	0.36175208555317	2	0
0	0.186639397164561	2	0
0	-0.0915047390392471	2	0
0	0.338452654403956	2	1
0	-0.1718396283501	2	0
0	-0.256291712103789	2	0
0	0.0730316057740647	2	0
1	0.476874999527951	2	0
0	-0.0288014590744587	2	0
0	0.393435017746015	2	0
0	0.0756425910235589	2	0
0	0.384153465684091	2	0
0	0.283721523966408	2	0
0	0.299738358002438	2	0
0	0.156858365363421	2	0
1	0.519113194917399	2	0
0	0.2545906738998	2	0
0	0.140671373695641	2	0
0	0.22986597438536	2	0
0	0.225888065517162	2	0
0	-0.124319472483673	2	0
0	-0.191667851963213	2	0
0	-0.152014712380059	2	0
1	0.301500950905228	2	0
0	0.218523313145335	2	0
0	0.295027619139947	2	0
0	0.206562762419154	2	0
0	-0.0771041468116667	2	0
0	-0.210223690365065	2	0
0	-0.249897680065615	2	0
0	0.176823542145831	2	0
1	0.534421154394037	2	0
0	0.253719900900155	2	0
1	0.546869105430836	2	1
0	0.192375025003815	2	0
0	0.251182686182437	2	0
0	0.188983183774218	2	0
0	0.380287032871254	2	0
0	0.194685561027355	2	0
0	0.20555407094815	2	0
0	0.368980288469878	2	0
0	0.275064711686472	2	0
0	0.3796237119059	2	0
0	0.0972141896631598	2	0
0	0.191911222840778	2	0
0	0.197225302755932	2	0
0	-0.097128565488537	2	0
0	-0.0328443095796874	2	0
0	0.269189101261049	2	0
0	0.0629176458615644	2	1
0	-0.152685276833917	2	0
1	0.246760049047777	2	0
0	0.0888169949125878	2	0
0	-0.0414838837853633	2	0
1	0.240926581005562	2	0
1	0.190540878355234	2	0
0	0.067272557549532	2	0
0	-0.16526637460141	2	0
0	0.219314940022753	2	0
1	0.402394611983335	2	1
1	0.499465839492028	2	1
0	0.245673061489908	2	0
0	0.290691932640996	2	0
0	-0.200494077818402	2	0
0	-0.055343335986389	2	0
0	-0.0940830423627003	2	0
0	0.456328180812756	2	0
1	0.449655367123322	2	0
0	0.118516470494496	2	0
0	0.0887203984017523	2	0
0	0.264155816087355	2	0
0	-0.107543667424416	2	0
1	0.414993572688268	2	0
0	-0.217560384665267	2	0
0	0.395392704504169	2	0
0	0.182372240725129	2	0
0	0.294317275715429	2	0
0	-0.289181947874016	2	0
0	0.261889018726823	2	0
0	-0.0903319160373914	2	0
0	0.20334293027173	2	0
1	0.451848162251384	2	0
0	0.536156340070504	2	0
0	0.348158227319533	2	0
1	0.353411774445771	2	0
0	-0.0382766448140414	2	0
0	0.340855706707531	2	0
0	0.334619866887364	2	0
0	0.347948772314378	2	0
0	0.0812313577363978	2	0
0	0.370349363995661	2	0
0	0.0473973961292741	2	0
0	0.176809546109499	2	0
0	-0.0865598474471076	2	0
0	0.39941504400318	2	0
0	-0.00594186800939187	2	0
0	-0.0278216098529626	2	0
0	0.13283556489383	2	1
0	0.110479857057939	2	0
0	0.237807005470094	2	0
0	0.314214329718323	2	0
1	0.372813076142864	2	0
0	-0.0714868267324553	2	0
0	0.390366513041898	2	0
0	-0.0817940322414453	2	0
0	0.0745371998730236	2	0
0	-0.152354302653352	2	0
1	0.489676122234976	2	0
1	0.452956171768179	2	0
0	0.246606272392933	2	0
0	0.433594610947766	2	0
0	0.00130991053534985	2	0
0	-0.0969666960879633	2	0
1	0.226296916222719	2	0
0	-0.102424686251099	2	0
0	0.218412665761642	2	0
0	0.373531167949607	2	0
0	-0.22929910953591	2	0
0	0.00682645432726328	2	0
0	0.0468643067728071	2	0
0	0.310965023919937	2	0
0	-0.104632131597808	2	0
0	0.29703186200985	2	0
0	0.163881751487611	2	0
0	0.144881131800036	2	0
0	0.356291592320358	2	0
0	0.241626668023906	2	0
0	0.282216505489544	2	0
1	0.680159975682752	2	0
0	-0.027794948795336	2	0
0	0.273850990687259	2	0
0	0.222194415098028	2	0
0	-0.0804082994733402	2	0
0	0.209132051646329	2	0
0	0.29754623700303	2	0
0	0.438751828020108	2	0
0	0.196646440676685	2	0
1	0.683595739524466	2	0
0	0.117271923737684	2	0
0	0.0506670231785474	2	0
1	0.308984309516916	2	1
1	0.307055894472987	2	0
0	-0.101980986520175	2	0
0	0.223930395881238	2	0
0	0.333337227201023	2	0
0	0.0933810907227234	2	0
0	0.101708916710547	2	0
0	0.208655272844133	2	0
0	0.335497456865323	2	0
1	0.572228892487037	2	0
0	0.312136206167131	2	0
0	0.48911676590173	2	0
0	0.264720708477257	2	0
0	0.337937799971427	2	0
1	0.382420274415552	2	0
0	0.256142930644376	2	0
0	0.256544281177777	2	0
0	-0.0834052179980658	2	0
0	0.292123555226578	2	0
0	0.404401461786098	2	0
1	0.201193970163798	2	1
0	-0.0308685407416094	2	0
0	0.333559468254451	2	0
0	-0.0238129349029471	2	0
0	0.240060251188462	2	0
0	0.328287376296888	2	0
0	0.356887839093581	2	0
0	0.241464380353856	2	0
0	-0.177970787610681	2	0
0	-0.156249879892315	2	0
0	-0.0890938823215534	2	0
0	0.281072300363894	2	0
0	0.206377100174691	2	0
0	0.414198267971056	2	0
0	0.137592434682521	2	1
0	-0.0554976024974709	2	0
1	0.357807375612642	2	0
0	-0.0110428990790051	2	0
0	0.143714188431497	2	0
0	0.24207837465091	2	0
0	0.132951622358359	2	1
0	0.203529218318609	2	0
1	0.34700073344353	2	0
0	0.112964935339745	2	0
0	-0.113796629276463	2	0
0	0.283585038374211	2	0
0	0.326454172802781	2	0
0	-0.0534345445214583	2	0
0	0.0420828635071633	2	0
0	-0.146745222918796	2	0
0	0.31191812636573	2	0
1	0.223722765402329	2	0
0	0.334747911376495	2	0
0	-0.200496337453539	2	0
0	0.000174277311214509	2	0
0	0.0950350187467195	2	0
0	0.176935641723194	2	0
1	0.475912415244221	2	0
0	0.581798062541007	2	1
0	0.0295630884919783	2	0
1	0.33238477418962	2	0
0	0.119058707978679	2	1
0	0.1584297994373	2	0
0	0.0177071153373216	2	1
0	0.310271507889813	2	0
0	0.34973971824069	2	0
0	0.302632329701167	2	0
0	-0.0199307987653933	2	0
0	-0.363264409820615	2	0
0	-0.208992138777611	2	0
0	0.240832886796418	2	0
0	0.161879574894342	2	0
1	0.137038336099333	2	0
0	0.150173591688345	2	0
0	0.346121230674507	2	0
0	-0.110179275731242	2	0
0	0.133305669307487	2	0
0	-0.169411694414244	2	0
0	0.264250687095297	2	0
0	0.129065075730646	2	0
0	0.010177946570046	2	0
0	-0.00176789405337666	2	0
0	-0.0325554442074366	2	0
0	-0.207417893078357	2	0
0	-0.219230380706889	2	0
0	0.433621819000123	2	0
0	-0.385711722256311	2	0
0	0.310469438983602	2	0
0	-0.110042387597301	2	0
0	0.106836448521846	2	0
0	0.125687491239978	2	0
0	0.235091237360671	2	0
0	-0.0742812873840195	2	0
0	0.0065995820923734	2	0
0	-0.0272375373425492	2	0
0	-0.102981684548418	2	0
0	0.171225030569936	2	0
0	0.188268074668566	2	0
0	-0.0308744597957708	2	0
0	0.0906949565487172	2	1
0	-0.0293439102827344	2	0
0	-0.339148263150747	2	0
1	0.395982211451589	2	0
0	-0.0772405113071337	2	0
0	-0.110373334316429	2	0
0	-0.228112026797847	2	0
0	0.205947279893111	2	1
0	0.324676040074611	2	0
1	0.126371328545754	2	0
0	0.362718090588472	2	0
0	0.155604753096908	2	0
1	0.173197219099296	2	0
0	0.119407994936423	2	0
0	-0.106157858498267	2	0
0	0.240631912049615	2	0
0	-0.0914804331661892	2	0
1	0.33021551997301	2	0
0	0.234590618966503	2	0
0	0.251426993507281	2	0
0	0.485767071579611	2	0
0	0.222440769774097	2	0
0	0.247316064259994	2	0
0	0.329400256635946	2	0
0	0.279529528973176	2	0
0	0.168687909990844	2	0
0	-0.0456407229587145	2	0
0	-0.125436361827056	2	0
1	0.00479056199636408	2	0
0	0.122930326628422	2	1
1	0.164039852908592	2	0
0	0.105992738539137	2	0
0	-0.152558205096968	2	0
0	0.0479285219658105	2	0
0	-0.0754106063190614	2	0
0	-0.128643657279113	2	0
0	-0.11045609794575	2	0
0	0.0214210422001307	2	0
0	-0.0293500996367316	2	0
0	0.303334339575678	2	0
1	0.385248063020168	2	0
0	0.293881363548062	2	0
0	-0.0473454823793986	2	0
0	-0.0045434929623877	2	0
0	0.220212049619291	2	0
1	0.401229693105262	2	0
0	0.301922259914037	2	0
0	-0.237718791923349	2	0
0	-0.21006336486407	2	0
0	-0.124746155311566	2	0
0	0.113626322434444	2	0
0	0.0526463576732781	2	1
0	0.59090923743071	2	0
0	0.405665764799215	2	0
0	0.0460732655310358	2	0
0	-0.293305601536073	2	0
0	0.41624014231519	2	0
1	0.33039148013803	2	1
0	-0.266660388777856	2	0
0	-0.210453830351451	2	0
0	0.535463377533051	2	0
0	0.286705569149242	2	0
0	0.168702037534263	2	0
0	-0.0310125626928597	2	0
0	0.13843581743225	2	0
0	0.269895760364931	2	0
0	0.31955686546263	2	0
0	0.00149013280228231	2	0
0	0.366749686983401	2	0
0	-0.325242096985973	2	0
0	-0.324802029699751	2	0
0	0.16344128034634	2	0
0	0.279621050373099	2	0
0	0.280790194575116	2	0
0	0.221343718378998	2	1
0	-0.380141540653616	2	0
0	-0.162842380362254	2	0
0	-0.114045823708816	2	0
0	0.0541289314908984	2	0
0	0.305871934203814	2	0
0	0.393135886753843	2	0
1	0.150089478619877	2	0
0	0.131796875926028	2	0
0	-0.230041416347429	2	0
1	0.194861029637349	2	0
0	-0.288384884573145	2	0
1	0.489482501476793	2	0
0	-0.171385762508619	2	0
0	0.187366598957345	2	0
0	0.270038812229766	2	0
1	0.363050693955495	2	1
0	-0.156552215970904	2	0
0	0.0448895103234968	2	0
0	-0.105902186945212	2	0
0	-0.00601991313610387	2	0
0	0.767953257380337	2	1
1	0.266582175927997	2	0
0	0.203031713620641	2	0
0	0.119577514379476	2	0
0	-0.216632145185855	2	0
0	0.0104940828802982	2	0
1	0.378506872285414	2	0
0	-0.242242402031737	2	0
0	0.0340772361691486	2	0
1	0.246921373693899	2	0
0	0.167902061907208	2	0
0	0.0605617926307203	2	0
0	0.39267507066877	2	0
0	0.154371350613715	2	0
0	-0.309319829105866	2	0
0	0.319387120191099	2	0
0	-0.0181550800511853	2	0
0	0.139400837915698	2	0
0	0.0022194822821974	2	0
0	0.196945270178597	2	0
0	0.0576102137828183	2	0
0	0.221763035189772	2	0
0	0.303763113796735	2	0
0	0.025084755441757	2	0
0	0.00638806009277725	2	0
0	0.0944290309444935	2	0
0	0.0899179975588705	2	0
0	-0.002574170371951	2	1
0	-0.148395591863055	2	0
0	-0.0835582775071629	2	0
0	-0.203319490773509	2	0
0	0.00471696875705875	2	0
0	-0.0463151725251991	2	0
0	0.365514630889957	2	0
0	-0.0729255704620942	2	0
0	-0.100030435709289	2	0
0	0.0866991312572545	2	0
0	0.00860782418992462	2	1
0	0.177230729231302	2	0
0	0.297575860773318	2	0
0	-0.0319653329312551	2	0
0	0.036038305599376	2	0
0	0.40851126244213	2	0
0	0.219400683232393	2	0
0	-0.101214307611095	2	0
0	0.0502032183822091	2	0
0	-0.119418349120355	2	0
0	0.0190469630606416	2	0
0	0.130894240111891	2	0
0	0.367045055917209	2	1
0	-0.125269644751111	2	0
0	-0.132627450092917	2	0
0	-0.0950081286466241	2	0
0	0.0888093928294332	2	0
0	0.275010528755087	2	0
0	0.138000376714662	2	0
0	0.284496928926934	2	0
0	0.177003653088092	2	0
0	0.0574643747171047	2	0
0	0.0810293777874389	2	0
0	-0.0926104426349361	2	0
0	0.0235338639065877	2	0
0	0.0480254997726682	2	0
0	0.55712828852032	2	0
0	0.133944524333852	2	0
0	-0.0248479346683822	2	0
0	0.197251120474676	2	0
0	0.0397523456876023	2	0
0	0.160232105643147	2	0
0	-0.046780577001723	2	0
0	0.0874891054923715	2	0
0	0.0499950715046923	2	0
0	-0.0737625515398427	2	0
0	0.241504296275083	2	0
0	-0.0854608774840965	2	0
0	0.121975619101274	2	0
1	0.652936129298124	2	0
0	-0.226792788419465	2	0
0	0.0616397850689254	2	0
0	0.0775516052012321	2	0
0	0.155752685464957	2	1
0	0.0426410563744649	2	0
0	0.199776900624158	2	0
0	0.252963303114755	2	1
0	0.00553201107841791	2	0
0	0.223537216002086	2	0
0	0.287244320362198	2	0
0	0.320764401461716	2	0
0	0.022828128823832	2	0
0	0.339690630248965	2	0
0	0.111287123495103	2	0
0	-0.0033442811752006	2	0
0	0.224686396805223	2	0
0	0.141571582141484	2	0
0	0.159171410608453	2	0
0	0.213386873833929	2	0
0	-0.0629069223709362	2	0
1	0.414169897139545	2	0
0	-0.0248535622370257	2	0
0	0.0132353368076653	2	0
0	0.111084607769626	2	0
0	0.177569247733648	2	0
0	-0.018959520956806	2	0
0	0.108632581172056	2	0
0	0.12432530806422	2	0
0	-0.105464939438324	2	0
0	0.0910587706036807	2	0
0	0.46511592733784	2	0
0	0.240014950187823	2	0
0	0.046893618179126	2	0
0	0.0321948369417297	2	0
0	-0.0999707086105577	2	0
0	-0.207275838082041	2	0
0	-0.155591950631823	2	0
0	0.219522199784148	2	0
0	0.110028602719821	2	1
0	0.0390726936557474	2	0
0	0.0821890372736954	2	0
0	-0.106143236582056	2	0
0	0.226198394738458	2	0
0	0.453540406253309	2	0
0	-0.116628443644576	2	0
0	0.0852779416622264	2	0
0	-0.114384330954132	2	0
0	0.192616437388656	2	0
0	0.162099229859141	2	0
0	-0.0169550228167816	2	0
0	0.0126081307360398	2	0
0	0.169744802362996	2	0
0	-0.00696480543141657	2	0
0	0.0258864064972531	2	0
0	-0.116332688837761	2	0
0	0.134073416574371	2	0
0	-0.0432955811856746	2	0
0	-0.200598254979541	2	0
0	0.0969979092720398	2	0
0	0.252430768485356	2	0
0	0.300373657822806	2	0
0	0.389466160959328	2	0
0	0.061388863127011	2	0
0	0.0139872604828659	2	0
0	-0.16120322013682	2	0
0	-0.161698061521825	2	0
0	-0.233141506779373	2	0
0	0.0655582369501933	2	0
0	0.141366554120061	2	0
0	0.171893175738119	2	1
0	0.0363003937302977	2	0
0	0.0363947266247307	2	0
0	0.0245270063443272	2	0
0	0.194096760064424	2	0
0	-0.138982059294137	2	0
0	0.112377131030025	2	0
0	-0.0674098147665692	2	0
0	0.0840788786011136	2	0
0	-0.137239719390005	2	0
0	0.10715956163094	2	0
0	0.303663473892126	2	0
1	0.671367728618858	2	0
0	0.0456077522796267	2	0
0	0.0713102280170538	2	0
0	0.077312950203748	2	0
0	-0.142237908704848	2	0
0	0.162103452597386	2	0
0	0.228535358044997	2	0
0	-0.0197731709077172	2	0
0	0.0542416578963567	2	0
0	0.0233651047800429	2	0
0	0.124011990678049	2	0
0	-0.0525760276292332	2	0
0	0.090077997930854	2	0
0	-0.0430222793976841	2	0
0	0.0167543684095455	2	0
0	0.14194859189992	2	0
0	0.309815142685165	2	0
0	-0.0841712053074607	2	0
0	-0.0623204476313905	2	0
0	0.048450474010287	2	0
0	0.314111847552746	2	0
0	0.0377326812036494	2	0
0	-0.0277240423016201	2	0
0	0.143545791779214	2	0
0	0.0977771993903255	2	0
0	0.415362073920426	2	0
0	0.340771734930805	2	0
0	-0.364080525364546	2	0
0	-0.0612948766395239	2	0
0	0.0540217775195078	2	0
0	-0.00016329247731291	2	0
0	0.364813088200681	2	0
0	0.0482572101448219	2	0
0	0.0155624679334024	2	0
0	0.0694523731628321	2	0
0	0.243457717311966	2	0
0	0.179929646793419	2	0
0	0.177978690630921	2	0
0	0.0442935477933708	2	0
0	0.305916619793716	2	0
0	0.169977285559884	2	0
0	0.26523203383715	2	0
0	0.347591447136995	2	0
0	-0.0990513311523209	2	0
1	0.257821675867883	2	0
0	-0.0862509483253042	2	0
0	0.199662364979804	2	0
0	0.0826614620200168	2	0
1	0.0802119119804562	2	0
0	0.307336280638747	2	0
0	0.0924561139754462	2	0
0	-0.0671897645386957	2	0
0	-0.0779332874907606	2	0
0	0.28388437907056	2	0
0	0.108088261734113	2	0
0	0.0470798987913814	2	0
0	0.152892075328184	2	0
0	0.0983727141406785	2	0
1	-0.0723368421098599	2	0
0	0.0835449288718485	2	0
1	0.414836131389291	2	0
0	0.0106936049379661	2	0
0	-0.0410262462408887	2	0
0	-0.207415040677294	2	0
0	0.43025357473177	2	0
0	0.17418676266841	2	0
0	0.0110394679738762	2	0
0	0.261845622713491	2	0
0	0.0267571716855484	2	0
0	0.364936480229999	2	0
0	0.0568673610181662	2	0
0	0.199010931047473	2	0
0	0.318969696407064	2	0
0	0.0758625541221765	2	0
0	-0.0862167091696562	2	0
0	-0.0735978054911465	2	0
0	0.0790026622729818	2	0
0	0.166313881389829	2	0
0	0.112920878659899	2	0
0	0.0976029624846812	2	0
1	0.386741340973638	2	0
0	0.00678842086776234	2	0
0	0.236512411858307	2	0
0	0.112280996980728	2	0
0	0.131968870890728	2	0
1	0.607748929664717	2	1
0	0.113556882850939	2	0
0	0.0462654259090338	2	0
0	0.190898244317304	2	0
0	-0.00563191275091147	2	0
0	0.176482314884117	2	0
0	0.388346174640537	2	0
0	0.307198950705997	2	0
0	0.254184232692615	2	0
0	0.181459150952497	2	0
0	0.358692610032457	2	0
0	-0.0403716167769186	2	0
0	-0.424903209693078	2	0
0	0.21354862731248	2	0
0	0.171185679125779	2	0
0	0.112133328990444	2	0
0	0.215898883293112	2	0
0	-0.14184816887862	2	0
0	0.131839042763122	2	0
0	-0.0852576777578862	2	0
0	0.115573397195618	2	0
0	0.12255437985712	2	0
0	0.108089838323499	2	0
0	0.154061596097763	2	0
0	-0.378113530469025	2	0
0	0.35378130039362	2	0
0	0.298374781022566	2	0
0	0.181337206002291	2	0
0	0.212287193835473	2	0
0	0.544144837640433	2	0
1	0.73138010847623	2	0
0	0.0916557974998541	2	0
0	0.230476025168833	2	0
1	0.407846073728721	2	0
0	0.0390226327939589	2	0
0	0.227336435690565	2	0
0	0.159071279433217	2	0
0	0.230082148983851	2	0
0	0.162074120090834	2	0
0	0.102005429208352	2	0
1	0.640110061080867	2	0
[truncated: 509 more rows]
