# Supplementary material for: Development and evaluation of a machine learning-based in-hospital COVID-19 disease outcome predictor (CODOP): A multicontinental retrospective study
Source: eLife. 2022 May 17;11:e75985. doi: 10.7554/eLife.75985 (PMC9129872; doi:10.7554/eLife.75985)
Supplement: Figure 2—source data 1. — al in the training dataset. [file elife-75985-fig2-data1.xlsx]

## Sheet: Klen etal_Figure 2-source data 
outcome	CODOP	COPE	Zhang	Age
0	0.728198016255674	0.136923396459632	0.46866877161333	80
1	0.401199799226549	0.267127189370548	0.0896588233473229	81
0	0.173239878247039	0.0914377757572897	0.0154328474438903	63
0	0.099778873634316	0.0415403720024078	0.0373693541007326	56
0	0.371883909022225	0.189541323139088	0.0765864204632099	86
0	0.0968722476066654	0.0632102776166684	0.0192274069134618	64
0	0.0923234624741418	0.0476009850378155	0.126521538093859	48
0	0.0888844338926643	0.0636816646937941	0.0228414976914247	67
0	0.675081315847369	0.135998032646051	0.505703044285888	84
0	0.124344192965475	0.0376336062536906	0.0233333931875571	63
0	0.225520878210614	0.06689980200311	0.230502159322795	75
0	0.49700740953085	0.10796286952897	0.0193603892835687	74
0	0.23664572296058	0.173820974636262	0.00431760310453159	69
0	-0.0683544219594449	0.017477879444501	0.000352547734928107	50
0	0.21341766044834	0.119973857684597	0.0218514361597266	62
0	0.202699182106096	0.115829937671634	0.0165661826193846	85
0	0.253341119545671	0.169457154878624	0.108005674847025	86
1	0.535455184561585	0.164670431667832	0.587713276659069	79
1	0.345428817236391	0.146285856139781	0.0655619501154238	87
0	0.266632969827721	0.197584058199036	0.0189295530004424	87
0	-0.155649969028682	0.0224631278030191	0.111638784183589	51
0	0.411102752823221	0.125018424561318	0.0173128821882426	90
0	0.367762611435662	0.245159741923722	0.221409739419981	85
1	0.26207302921304	0.151390997002963	0.0306676281715939	90
0	0.279751913088069	0.192753674018783	0.0970194169946219	89
0	0.350682058633535	0.253010946376648	0.117972684328491	92
0	0.29146901671025	0.123651280284267	0.0193559455808799	97
0	0.334970496004482	0.161866708820135	0.232674623931189	77
0	0.143850265067952	0.0872164788641411	0.0204648384798717	63
1	0.460693225078781	0.250569573042241	0.0227575052296281	88
1	0.194773277879501	0.0523974382037909	0.0288491882429788	59
0	-0.135204453249679	0.00992478373234598	0.0228209725205507	21
0	-0.13391634858095	0.0101027187949326	0.0258838855062983	23
0	0.283851737637088	0.12637301623239	0.167402405658782	53
1	0.465842372837318	0.260552807882138	0.0476595374348693	84
0	0.0181843818841193	0.0247499210688241	0.0385624756006811	45
0	0.380268723044777	0.160488487411871	0.601252377326137	77
1	0.265815818334411	0.145605629415887	0.0607908482520037	78
0	-0.102672934048788	0.0172097501700439	0.00463841243000527	32
0	0.233341924803974	0	1.71360258222401e-06	80
1	0.363935570063421	0.164997221252248	0.463482906700071	82
0	0.339873853500575	0.107847429150106	0.0262201577110634	74
0	0.245319617640443	0.127182980672865	0.140085752784626	73
0	0.0478427432892098	0.119166199953628	0.000778005232651171	75
0	0.206336472834969	0.0727022681771679	0.12393643547634	72
0	0.123054932556301	0.070561445172971	0.0466949058567818	63
0	0.182304058242537	0.0991904168001532	0.0249304241626204	86
1	0.388040933084793	0.181323616413654	0.639731756510054	68
1	0.510026670710512	0.268346329643079	0.800042512151655	89
1	0.441643612575778	0.267949308721518	0.615558909206122	89
0	0.0734748051669776	0.0364791105251538	0.0360928594286231	51
0	0.0592380409620755	0.0347920179071284	0.0143916637689845	54
0	0.0755206356952954	0.0682382317514287	0.00568597694531915	69
0	0.0686221353056247	0.0377364277162008	0.0396201933510586	56
1	0.407080149068344	0.216632887813588	0.638193059640898	79
0	-0.0133539826768834	0.0255464053462542	0.0609680288728449	38
0	0.27706145212788	0.108829563446872	0.133316262097884	80
1	0.34565846681858	0.163574303023465	0.0832940286828608	81
0	0.110381927979873	0.0608588390063292	0.0567123155708947	56
0	0.203674182830675	0.0719263567945989	0.0565894000786879	60
0	0.111218990571575	0.061781556603226	0.047085058864128	60
0	0.179048963872813	0.104025405392218	0.0591988370082949	77
0	0.326887280481027	0.212267135942182	0.0887309107254641	88
0	0.096169649284878	0.0212649304014304	0.0989720388015082	56
1	0.272499033041534	0.104502267396171	0.124393058245684	75
0	0.375035419381295	0.155270380354245	0.223532697237628	77
0	0.28134711573261	0.108302734245888	0.0206433444625313	78
0	0.156505931695718	0.0991664122157054	0.0169938490952218	69
0	0.143725858448765	0.112229313168486	0.0228361638762048	56
0	0.513390233149182	0.1982839272376	0.275784580469213	83
0	0.283342751077474	0.170649219527611	0.0186659117714663	62
0	0.240554614417923	0.109838847401119	0.00678143565563601	82
0	0.260950500300973	0.184060339257844	0.0553820034006815	87
0	0.327639731957827	0.218937102122824	0.0988947495891817	86
0	0.06680102714476	0.0400496201891558	0.010923125435867	56
0	0.170799338606374	0.0943084456796103	0.00820868549131989	66
0	0.224244061569875	0.101712557774056	0.0749969272466608	43
0	-0.0407691756260175	0.0195711452533979	0.00391206600346927	44
1	0.15257900541086	0.0867379248315187	0.0365577299083283	71
1	0.364160891964661	0.124209305809799	0.58457914985164	76
0	0.134022122104914	0.0674988609149798	0.00763324337241712	61
1	0.22929906923252	0.161918953596176	0.0821799557064366	79
1	0.517452616309083	0.331277152602858	0.441733443558206	76
0	0.0931391240074536	0.0442769299361824	0.0161960394407121	49
0	0.0213282230362264	0.0233297996670236	0.00475117929662117	56
0	0.437569749613113	0.276837572584895	0.818159902745772	79
0	0.0921610673309218	0.0423910395819863	0.0540387657295705	62
1	0.536626799282382	0.32618048988204	0.0777768722219696	76
0	-0.0754550770619078	0.0170347619959844	0.029927590117274	30
0	0.0401391713806286	0.0386097701732163	0.01354019491547	55
0	0.386664205595546	0.13048819741556	0.16580567388849	84
0	0.241165052323918	0.0914293551604396	0.01511228103782	75
1	0.107570434072495	0.050169156055576	0.0552856138957839	61
0	-0.0615480698230213	0.0116056406357438	0.023526046288999	33
0	-0.0491487336919039	0.0154787383115987	0.0374586302272645	24
1	0.453773282418038	0.173339409344567	0.963994715147738	68
1	0.312827279574378	0.214632937762714	0.040163670305448	88
0	0.245842197050356	0.127831613192221	0.112073912630362	73
0	0.0456887799088882	0.0332565987285336	0.0311818746224537	41
0	0.340238351692172	0.130336197616195	0.5327605193122	67
0	0.185356203287928	0.0841577453467597	0.128875294213223	57
0	0.0877731866649563	0.046001437603637	0.0193813969018816	54
0	0.0459236661978413	0.0328858179368839	0.0211278303407316	60
0	0.183133598590064	0.15351982510952	0.0341782439436897	79
0	0.161145330431172	0.0499963633660958	0.00616024203163674	67
0	0.140037970618062	0.0894373506306711	0.0394512153837498	65
0	0.142172750640737	0.0376960011154377	0.0893245739206332	44
0	0.106343343106838	0.031694416104747	0.00320555313436326	62
0	0.386221267664474	0.123610455488792	0.399315041933597	72
0	0.598081607256628	0.329509300639836	0.591212527738903	70
0	-0.0730860444504896	0.0132634407054677	0.0173945638566777	46
0	-0.0322065274311577	0.0151199707015717	0.0012543659288437	51
0	0.450133734789927	0.129285146935133	0.983627595223505	58
0	0.130520904761179	0.0626504569193307	0.0168720657751396	70
0	0.283465919197437	0.105355670527274	0.456058672854374	70
0	0.34575501642241	0.283531032365718	0.0673176063284575	79
0	0.340985520356532	0.179385902666229	0.101122790209029	70
0	0.163342099233476	0.0934182035462433	0.0543671169926547	62
1	0.355413988242265	0.323406074281222	0.155137651388036	86
0	-0.156664078438021	0.00910805509615391	0.00522215693339371	22
0	0.31772858866992	0.278430384318462	0.013592854886631	78
0	0.306941426575609	0.212210931014011	0.0547928749673156	87
0	0.215287387562415	0.0780953159597836	0.140411315642124	42
0	-0.0267260784467305	0.0293466417982732	0.00231167417246966	49
1	0.409558522883404	0.332444491978848	0.0106041201368958	94
0	0.272179154555478	0.220973426517691	0.0199544100528391	66
1	0.723093879347364	0.425080421077515	0.698919591068725	88
0	0.441702759491933	0.334395622093041	0.104845835463962	76
0	0.234601045200218	0.104193921920556	0.0272086173145851	75
1	0.304014369567026	0.160043010379515	7.81494085540113e-05	76
0	0.228072509895932	0.119531258398064	0.273531980455578	55
1	0.23437170904858	0.149030230057705	0.00671449178508834	86
0	0.578294028394945	0.486427134511839	0.316002763901588	79
0	0.0295665830127744	0.0405117860363721	0.00278335779962242	57
0	0.325245322642621	0.116993228209885	0.120267451192581	62
0	0.156827088948608	0.054277226311151	0.0557701987057095	66
0	-0.0536335176248224	0.0136096739318646	0.0189693363634148	40
1	0.100709363011026	0.14602816650892	0.0254024250073724	78
0	0.112766970414335	0.0542079957486559	0.0196139972684062	59
0	-0.0435177016442397	0.0245113768858144	0.00358178095915455	44
0	0.246167529575445	0.0925359011121744	0.00589983404123646	79
0	0.333968896134621	0.30119641921784	0.0161046749223602	95
0	0.137544428021158	0.0644605688125105	0.00606101275244795	68
0	-0.0435177016442397	0.0245113768858144	0.00358178095915455	44
0	0.695003454845761	0.482214667493551	0.220577196906827	72
0	0.0232533197769241	0.0397089787447569	0.0361217463865729	46
0	0.0486390643223812	0.0285734710289391	0.0170134719584102	62
0	0.0599827365681036	0.0327685039446813	0.0559896690855331	48
0	0.068875283649826	0.0532354223399932	0.0178829997928306	56
0	0.000329593217329505	0.0276319577585015	0.0231117771333132	46
0	0.196882984808402	0.071424593275207	0.016446005483042	70
0	0.130992708281329	0.0294313058764726	0.00746779328634164	68
1	0.264907128171007	0.137569960478856	0.137983545492607	68
0	0.000911805781999394	0.0236012335603653	0.0100934892606092	47
0	0.203201479594734	0.125088843047042	0.0817803290267311	73
0	0.195155072524347	0.0711970602303034	0.147605041612376	53
0	0.187021700718438	0.0894436910156187	0.0477063051891107	71
0	0.052981708605528	0.024723926400454	0.18137937652008	28
0	0.067569240220254	0.0432522631131311	0.0166351887316725	65
0	0.210862777691408	0.0445211986237347	0.0758238421721688	71
0	0.0929132380356396	0.0608776591567917	0.0212067705778658	66
1	0.237970237260882	0.0988750333608136	0.25908112222189	52
1	0.421587834506607	0.160523632143911	0.618349858712348	87
0	0.186369449768165	0.0815065660561706	0.0223606089372538	59
0	-0.00280982261388478	0.0568917083305963	2.33290021017477e-05	71
1	0.188009411077664	0.205888889203886	0.29991137564604	79
1	0.501850834509732	0.15950949880253	0.0595350266038282	91
0	0.150105144052794	0.0464071637305805	0.00955376830819396	68
0	0.207580585646765	0.157152784218209	0.0131299833292075	80
0	0.375120349321381	0.119260776399893	0.0669670432694434	70
0	0.584968452300279	0.238452494746768	0.975523487424564	74
0	0.157245723998993	0.0930210614081418	0.0749194057593845	59
0	-0.028878526241525	0.0239189963659417	0.0145900218379729	44
0	0.396986030870704	0.104980772339189	0.950967198752018	64
0	0.237622453636508	0.136136657887938	0.108862810610062	70
0	0.369350916295488	0.151229180402781	0.931412380826962	74
0	0.0641766539083391	0.0359221195594564	0.0144322879570038	51
1	0.281175977454504	0.123246894470236	0.248301810279693	86
0	0.159109497498881	0.0598452200761553	0.0402161318534834	59
0	-0.10779967760521	0.0101868652930565	0.00072961045211061	40
0	0.0237556825413653	0.0226934104852717	0.0578947704565152	40
0	0.0174118307429789	0.0340752187821397	0.0344283513210642	60
0	0.314333700396826	0.111173244488187	0.395438052013632	65
0	-0.040772943516069	0.0204043285830117	0.00806519162213805	37
0	0.230188902700974	0.112817696839546	0.115693433745558	65
0	0.283582939649965	0.0681006900793509	0.582678844063243	55
0	0.246666709843601	0.0687320489965171	0.173027640742026	56
0	0.369401645786305	0.165799493140401	0.626609811778625	72
0	0.127984354042881	0.0491555917956327	0.0084255947858596	67
0	0.385104327364245	0.0788973068166932	0.683079489715201	59
0	0.142221299471311	0.0389974400858829	0.140386936825437	41
0	-0.0989093375095046	0.00976079993715897	0.00871712965863007	35
0	-0.0250872609264105	0.0261194215972854	0.00918532946129122	43
0	0.480104360298747	0.148318336771363	0.862629080015038	55
1	0.767163583517279	0.238041583631403	0.842180227011794	76
0	-0.00390917848376217	0.0220570539026246	0.013180653011677	51
1	0.542772966954384	0.29831576706407	0.726117384274508	63
1	0.383422921931822	0.236585570158178	0.0511946392181331	91
0	0.365035671490479	0.329882746425248	0.058104297722306	83
0	0.0792104748488111	0.0647150820728467	0.0154065068351386	61
1	0.5350150856696	0.358427956627042	0.625918445428459	91
0	0.228634718036614	0.146119414894372	0.00537933899100146	61
0	0.362750247356841	0.212120898653166	0.010605610057968	83
0	0.0404481364155765	0.0545134930127342	0.0121508735379188	57
0	0.371177596090201	0.193334345161583	0.627446108809441	66
0	0.234766926394854	0.144237001960932	0.0759414408802928	53
0	0.136510155629293	0.0856669658022195	0.00134023802031489	48
0	0.224176196626141	0.140625142644249	0.0197530248895292	80
1	0.502211552425686	0.228364665928087	0.0864925300630352	85
0	-0.0834679177054933	0.0108163870987635	0.00329119506109511	35
1	0.658760474143298	0.56646584915506	3.05470797968987e-09	87
1	0.388763077282674	0.208055361474722	0.165123541005307	92
0	0.00982208930121958	0.0114391566459997	0.541933020867774	19
0	0.358513916731137	0.267352154125672	0.34241740136329	79
0	0.240610973062533	0.127656053460595	0.0642920805244985	58
0	0.199781441411257	0.129803678496241	0.0340764580206342	83
1	0.595268938354496	0.318545863885916	0.171995978326461	90
0	0.403669458752797	0.28616782419058	0.0573745106251139	76
0	0.119467681993219	0.0599042724484569	0.0870567976343314	64
0	0.043265121508672	0.0440946602140244	0.0125764890160385	51
0	-0.122016299131456	0.00939858821554924	0.0107749281116742	32
0	0.488372460606647	0.122306830434226	0.919604840191108	64
0	0.246420318701793	0.0829218004279221	0.350591569167861	53
0	0.260088073136579	0.123467920624797	0.0598110840611761	80
0	0.0960012421595727	0.0482326386712186	0.00816807891086568	47
0	0.342962416070692	0.165817138913953	0.375481930000536	77
0	0.00154061084373679	0.0251667467900896	0.0492608579630857	45
0	0.0856986756245628	0.0353714908212828	0.00278296947220774	50
0	0.136791208155793	0.0676841476294877	0.0333151619882047	77
0	0.122180002636955	0.0641997359227724	0.0771774307583892	48
0	0.280374379874893	0.102934692728305	0.271512969040425	66
0	0.0119506276215908	0.0158033524396776	0.0208896625887182	55
0	0.340933252451321	0.137219572005247	0.492340599217207	60
1	0.631510228656939	0.406202840723768	0.954997044625922	81
0	0.125953206912284	0.0593893545325366	0.0737078813030431	53
0	-0.0387477905350294	0.0242552185481668	0.0199201958591745	45
0	-0.184203863462424	0.00847450091961956	0.0265866211508914	35
0	0.141756680457282	0.0398063866809564	0.0720030533518215	65
0	0.285592063279606	0.0569585933945596	0.66885923792375	47
0	0.583607514655689	0.25430615190664	0.036863724671465	58
0	-0.0973831357754881	0.0257132527284958	0.00779315420816741	34
0	0.310153688305745	0.187324530856674	0.0650558345749553	71
0	0.142159522482965	0.0669463440402905	0.00361154723550184	59
1	0.188080652291894	0.0755674707893331	0.033139448199552	64
0	0.620687571046985	0.479491920223358	0.218213811728707	72
1	0.381481781397359	0.264532131822805	0.0754152703496548	73
0	0.145987959284656	0.0965486005205776	0.0571876169768903	67
0	0.232841832761882	0.229465385987262	0.0120983996228171	74
0	0.463748101094369	0.18696986258507	0.81349323263752	78
0	0.416481617657467	0.157863564551648	0.295418745810148	93
0	0.12154043464501	0.0516544791113047	0.0668759451784441	58
0	-0.171267903510673	0.00590926323092551	0.000579989780278037	32
0	0.216722577197744	0.111493457256739	0.108375800943113	75
0	-0.0497842971243827	0.0161742445586186	0.00170048487314777	44
0	0.239137042639906	0.169414444991534	0.100839635057202	77
1	0.474826835182872	0.194051747542512	0.562342654901818	92
0	0.21425559425196	0.0843385079637727	0.163265389218699	70
0	0.0870382516222841	0.0541156856118561	0.00851343480606876	58
0	0.179062135337055	0.0810309061295528	0.0212410467702922	72
0	0.383216407952852	0.118935233223716	0.875675454014906	74
0	0.285654562851569	0.124176978381501	0.055712301131352	70
0	0.0683844875080864	0.0318323252243343	0.00358877218751594	54
0	0.015284511782571	0.0220368615878688	0.00615008735138484	58
0	0.294667461706668	0.0598067117302827	0.513062048116786	61
0	0.261796902528901	0.135677500417752	0.0685952962105263	83
0	0.113872087137951	0.0471368655358794	0.0397055142739812	58
0	0.107599353824696	0.0530940790014767	0.0694369997364515	69
0	0.00670430602248196	0.0496400236899	0.0166266844706093	59
1	0.437355980402191	0.21153705172577	0.561974681151262	62
1	0.180715851259495	0.0570786584111798	0.0100112128093664	77
1	0.247644023688491	0.0788386129528842	0.618663680372446	66
0	0.300345685596475	0.10827632226028	0.79180830924141	61
0	0.108859697262706	0.0667250842906597	0.0243229806414346	61
0	0.140028663835117	0.10623040550976	0.0860246344232928	71
0	0.109032691886234	0.101161744648893	0.00388794151104339	74
0	0.286657971930025	0.135766893802772	0.113914031984108	77
0	-0.0168947864470249	0.0156250477256478	0.0178882695144112	47
1	0.714396131340542	0.161489055106232	0.534313561857437	84
0	0.117795149227958	0.0595146107983865	0.0354800511289339	70
0	0.363240200761442	0.170539624135509	0.591060240298739	78
0	-0.00795615036560886	0.0104144061952707	0.0270662107744272	49
1	0.338505256384546	0.12296647051845	0.301101119166327	79
0	0.152342491131516	0.0585298176298165	0.0264351488980341	77
0	0.0786904610730582	0.0843610020728973	0.166218260652082	68
0	-0.030026679467832	0.0176256763512128	0.00923396469041394	46
0	0.240545163302531	0.0704405094474755	0.679771102606779	46
0	0.281162076297578	0.108829563446872	0.0995593848829666	80
0	0.140028663835117	0.10623040550976	0.0860246344232928	71
0	0.0389873603155162	0.0381177985160512	0.0103196729868203	53
1	0.557223334940306	0.379262942608831	0.563765903615429	96
0	0.0894305585580821	0.042875871233365	0.0145822602099758	65
1	0.401715693964912	0.144509288662039	0.423070844157594	74
0	0.110902114594342	0.0755874789253517	0.00449117370983871	61
0	0.201935198547384	0.17056747533514	0.00411755369974095	88
0	0.322580355742147	0.104648979772226	0.24686461873664	84
0	0.139674277555181	0.0692528265574341	0.0199231245773202	67
1	0.343573627623155	0.223302708055752	0.0231026800997333	96
0	-0.0140118503804313	0	0.00500840436214415	48
0	0.10513817073035	0.0847356641809955	0.0221848721375617	62
0	-0.0725822458839916	0	0.00104568495514624	47
0	0.0366448667235926	0.0286678952323458	0.00595892805831531	53
0	-0.159206899797281	0.0106755111804957	0.000793135524261949	36
0	0.215421308019421	0.0829184399236814	0.011596474439586	87
0	0.140560463905803	0.02777438806965	0.0979228683799323	56
0	0.432731375212877	0.197936908372677	0.762334295339348	87
0	-0.018380146772725	0.0245958302625849	0.0549351621527518	38
0	0.170231248717154	0.084373115477546	0.0120746381648175	75
1	0.759508851215319	0.273351441778658	0.711922667554566	88
0	0.103735524372319	0.058744833365923	0.0209388069575147	57
1	0.321077409553341	0.0709802922911642	0.74434962901453	62
0	0.359206552437744	0.179309318447618	0.589785830342883	80
1	0.705773620786363	0.175666702840286	0.922104485177843	77
0	0.116801635525071	0.0536316539609672	0.0101163957376362	67
0	0.00128026449111287	0.0177545541100257	0.0169420409496061	47
0	0.333097866441086	0.067559239806525	0.947700910723967	45
0	0.233072468426484	0.122897340191135	0.0264155941829496	83
0	0.349831304113461	0.107541464473248	0.551011915161643	58
0	0.381493789477703	0.203059309721838	0.184020835473877	91
0	0.406766428399915	0.210274496598486	0.658885165113435	81
1	0.326919457704165	0.126009473676848	0.451834859832653	73
0	0.499300393292437	0.247667867229773	0.962843783338696	70
0	0.254440476838249	0.155896036153003	0.033880431422674	87
0	0.183843520541089	0.0846373506974103	0.0455071838406087	72
1	0.316133207117688	0.147646108511914	0.162271946860108	76
0	0.188582806620579	0.0839267338786453	0.0388489727947155	69
0	0.111031938375931	0.0880025024856914	0.00842592828104747	69
1	0.27242424687654	0.247625314493775	0.0311758332758689	94
0	0.0892051007677285	0.0389258429038171	0.0304974533881332	61
0	0.480827314819595	0.209109156236822	0.628073298994306	71
0	0.105971536623796	0.0290381670389418	0.0612583629283388	42
0	-0.00375959366861347	0.0254453505772215	0.0161470366178893	50
0	0.246585484438889	0.130441598191537	0.0399261037770441	71
1	0.355443692560074	0.267303084919078	0.137852759091975	91
0	0.199644341156806	0.0911095463916968	0.0162103860415642	77
0	0.242825602459639	0.0514227463032939	0.436325135026973	49
0	0.267429540914677	0.0849983099468419	0.0402076409775803	79
0	0.284189354962304	0.142948884074037	0.115841863702876	64
0	0.285604318236409	0.175516237624049	0.0427305856251085	56
1	0.49506328900251	0.349033493109006	0.561403510081516	86
0	0.0796395623859993	0.0455476834255487	0.0484006930750543	53
0	0.278657452950828	0.0460985143096938	0.379504966529937	51
0	0.113790146331414	0.0614759802584316	0.0268665314571854	60
0	0.49214556063783	0.0892543172991953	0.986253514575105	76
0	0.350366607561352	0.211692529863067	0.12725728263671	89
0	0.107902830146965	0.0218312575882015	0.00334953057589797	49
0	-0.0517084520983678	0.0094161095794187	0.00479292520080641	45
0	0.194805109528672	0.0521513055334239	0.344955010184996	76
0	0.0223924895355371	0.0344213823067324	0.0878062350475213	40
0	0.222057820611892	0.0881893809211268	0.181846073072588	76
1	0.579932348750516	0.243191415720716	0.805134575706202	80
0	0.241179281099444	0.0741965365503282	0.166706669907225	61
0	0.157332255064217	0.0718893932922118	0.125365795759354	58
0	0.377275369198546	0.21000412676221	0.522690196437969	76
0	0.451811335082043	0.0984327658857219	0.840404090762082	57
0	0.210194721233922	0.155480541141233	0.0181935524784848	70
0	0.507214410063747	0.355220750389453	0.297543753175207	74
0	0.225717111663355	0.204119272814735	0.0394703914740068	80
0	-0.0346959888547007	0.0230188730738487	0.0224832043518799	33
1	0.386045786072039	0.313419112252859	0.109018620248359	80
0	0.13902265579364	0.119291084398505	0.0132873564340562	73
0	0.198494152001426	0.142549396410671	0.035216944559176	79
0	0.398332305807673	0.249369025251478	0.231116612562562	74
0	0.200590226020269	0.141114124800128	0.021531196940637	69
0	0.244130556072197	0.16830928514277	0.0954645159653189	81
0	0.217670897655354	0.0793662805970216	0.0256889437612925	72
1	0.295135278534093	0.180109403809623	0.0225899772309822	88
0	0.381170952400156	0.145857535280981	0.601790249303816	73
1	0.353560004505609	0.345761320407379	0.017502399481694	95
0	0.145744181822348	0.0837396399589976	0.00610192772450729	60
1	0.394356147751455	0.249315542818747	0.0343967843973207	80
0	0.492997782107728	0.218336734667578	0.787427815844098	79
0	-0.10036932891296	0.0187905504683026	0.0176604386601932	27
0	0.178667326081657	0.105200293405636	0.0185698781907359	78
0	0.236430499305773	0.157600402389505	0.0306952864678901	80
0	0.231943946942219	0.175328665995793	0.0207829595244451	77
0	0.428954040919381	0.399766165191493	0.201250027752119	86
0	0.215830487704809	0.127795952940312	0.0129246515500149	73
1	0.423437873017533	0.279301608232474	0.262559067686812	70
0	0.321752890363051	0.211089335236484	0.101504376754179	88
0	0.291104524333963	0.286643816329539	0.00179739133190161	82
0	0.251865444132923	0.141887188566022	0.057950975300446	79
0	0.505726116289433	0.377130916359255	0.00255287321191104	92
0	0.125909115298457	0.0497959518994766	0.00307043793367988	49
0	0.147856438507892	0	0.0272206894657026	67
0	0.241360564049169	0.180248188535363	0.00650679687649698	79
0	0.136200992269074	0.0841863366656106	0.00433642168291109	57
0	0.125888532863104	0.0913315701043985	0.00402352523346216	66.679109811566
1	0.597806992821907	0.320451330289052	0.682591941296903	98
0	0.0595793657544153	0.0728915305275848	0.0173021331592198	60
0	0.269649807344045	0.118227000742108	0.0663885829137752	71
0	0.203726732933353	0.120190065404904	0.119819103418803	63
1	0.233945646507173	0.132721076792596	0.0606905476415106	91
1	0.739431892353204	0.277603214269881	0.726210263742939	91
0	0.0736608331529715	0.0622721002573502	0.0590469444419866	50
1	0.251820090986029	0.118207022441085	0.118778213785878	78
0	0.296184429607742	0.11344782637174	0.43056328570409	72
0	0.382798479622148	0.176266596345182	0.721290929246172	61
0	0.0689401744590294	0.0518505135693656	0.0126303116340263	54
0	0.161101733702385	0.0723010752618962	0.0209267971106151	59
0	0.765405309503141	0.339438512489477	0.964284171990427	75
0	0.30300683353907	0.167420559292605	0.0145837690967598	94
0	0.182662601523376	0.0794750979805256	0.0973019626713849	66
0	0.310722729845627	0.0399163017071691	0.0642149401623387	61
1	0.173179960177948	0.0818097938385677	0.0743837656911274	62
0	0.208004767142161	0.101267039811692	0.365103083149304	43
0	0.0365422761923146	0.0342847251102517	0.0555436162206215	41
0	0.169865379429148	0.103325196383052	0.021513109056849	80
1	0.410587701213007	0.0726811702743042	0.0278820034338396	61
0	0.189634612003377	0.112487870399739	0.00190147723254644	74
0	0.263004399734064	0.130437144544115	0.0465798818198217	66
0	0.369440698777916	0	0.0335988394950201	86
1	0.753151555203693	0.298525300462872	0.986219569345009	77
1	0.771518066001608	0.307556734575953	0.404857532667603	87
0	0.163201101327734	0.0510598628785648	0.0322977800630519	60
0	0.153275695642028	0.0785868251888211	0.0111557484569134	80
1	0.561667487753354	0.0961278108944805	0.613378079656756	60
1	1.25123778109366	0.76364830629451	0.970391621160547	90
0	0.155797360827347	0.0619624444530489	0.000609276494744449	83
0	0.382950412950532	0.215202358880983	0.136053116587851	90
0	-0.0630391841622129	0.0141160154351308	0.0209122754375092	43
1	0.294628776975591	0.121697857212797	0.162068151807358	84
1	0.333683262924283	0.17117906211899	0.263297627800418	86
0	0.291785466371024	0.152816921767903	0.0713183781799078	79
0	0.230748880538689	0.119992096069347	0.0456893108219085	85
0	0.211682747659933	0.106778589160474	0.024045645048765	86
1	0.423361023358395	0.296364122456067	0.359463856331511	91
0	0.196871326020439	0.0635154834170356	0.0423621697862807	75
0	0.244739878145348	0.0608693217275244	0.073857617376465	81
0	0.408498070311307	0.0818404838552956	0.931089515308189	72
0	0.27353377018263	0.125311385424168	0.0580716883113747	93
0	0.233807690840576	0.140421385584011	0.00190754675267074	89
1	0.40084751588873	0.201049311928068	0.182914361976519	87
1	0.411920666134023	0.1340386638473	0.0572904699243812	90
0	0.0366489061155722	0.0389063137800289	0.0351442727636235	70
0	0.255081615940602	0.0937440595118333	0.00271018391829	91
0	0.320481246285735	0.197910995342842	0.0243398613325714	96
1	0.471946245707585	0.298380841867973	0.312410351293415	84
0	0.303242077114802	0.152643009502673	0.0330846054537477	89
1	0.419911783383365	0.242888780854471	0.299203643563133	90
0	0.214844830045022	0.0834474423624099	0.0312100422428083	80
1	0.392398460727743	0.386612832816065	0.0609962024146042	92
1	0.34336114417591	0.166483254357482	0.0313364666262336	101
0	0.306605851404938	0.224226809066198	0.0233759533049982	85
0	0.345605295024735	0.144939690972556	0.0299153434890224	89
0	0.247394421831733	0.133967354684622	0.0288610978154083	78
0	0.404274801185305	0.115157444578096	0.0752737114245069	76
0	-0.0843756947724696	0.014777556832733	0.00433443989754904	36
0	0.222546617824906	0.12157763098213	0.0188227308822139	85
0	0.114672779864921	0.0466760923698084	0.0575796653595607	63
0	0.367969507416017	0.156739059539584	0.137263278285227	75
0	0.274456940952838	0.103652700198039	0.00518943803191308	89
1	0.577927511682785	0.214243362565603	0.154574755272945	86
0	0.0820540141407713	0.0198866828174995	0.0152276009141296	62
0	0.253180466463793	0.0737937263242371	0.000156032556304228	89
0	0.213521199342581	0.0464174875810019	0.00384285317998314	73
0	0.60038439435509	0.137898670951537	0.193082973692241	81
1	0.566727370482781	0.453964387382343	0.0605361385941919	86
0	0.342539432719134	0.132941554486573	0.00559242076019379	85
0	0.47159049522269	0.19131736890889	0.384445153187913	89
1	0.347455088114115	0.244343660174227	0.0567765449643062	76
1	0.213780899162591	0.121803811306804	0.0330501695283575	54
0	0.364272118964977	0.352983090108818	0.0536850988098625	88
0	0.300608631525227	0.145674937111915	0.209550018621313	53
1	0.278623973766774	0.162684579535942	0.0453181764937807	70
1	0.724485304570751	0.405769926463992	0.465330742935309	60
1	0.590367892413075	0.173517420995346	0.554574236996639	77
0	0.305890253096905	0.185635958231315	0.0442898173561647	58
1	0.268433977413281	0.156995679639163	0.0117019374052683	75
0	0.0276141203074042	0.0719634194731477	0.00253984284042846	50
1	0.441927702812406	0.375183421509583	0.0672770004155934	94
0	0.079926581427656	0.0554225919844635	0.0044509363553178	52
0	0.0511363401883643	0.0330789832524979	0.0227186165663904	38
0	0.245385230054895	0.080486502566073	0.0332549263792647	86
0	0.221045551629863	0.151238412637322	0.0773629519982719	86
0	0.226844753814925	0.114738351433142	0.0639091543889005	83
0	0.390128551270448	0.224157371654891	0.0880962149501	78
0	0.286871635041541	0.166359850032069	0.0601449083038743	83
1	0.314697358836131	0.127205978565621	0.156706039188212	79
0	0.0393644596815125	0.0279202293682155	0.0118181656190422	60
1	0.572736549505978	0.236513102231531	0.740057448699896	79
0	0.10895318529177	0.0548930195952154	0.043490095687295	67
0	0.0596827060134305	0.034917397583559	0.0112057867351812	51
0	0.0687388474651182	0.0185288671906708	0.020513386115066	60
0	0.158547637346413	0.0545012476277724	0.0927856365136882	86
1	0.576379851728838	0.198386020802521	0.982999271224778	86
0	0.0225492886018082	0.0296797093948974	0.00829242431193196	52
0	0.246764283776636	0.0795172346194096	0.0121779585894897	80
0	0.233507626661825	0.0576203481491601	0.297085994892349	67
0	0.180961555460842	0.0539046613008604	0.114358203606414	73
0	0.389346491329461	0.267163051726251	0.0296997216050581	93
1	0.312717768792671	0.206241672202853	0.0220837947411704	88
0	0.252452732376141	0.141571395806384	0.0230358126995164	71
0	0.0756549638126347	0.0585126043040914	0.00704246311962064	56
1	0.571461550364251	0.455398903643144	0.613955566623151	86
0	0.262673878328896	0.193305176028194	0.0717675397110521	71
0	0.253419661434177	0.196265389647126	0.0405766395722263	75
0	0.180760340576241	0.119356765636474	0.0155173134166735	61
0	0.107166541843458	0.0507273766264747	0.112842457300454	42
0	0.137634436399081	0.0693277894860422	0.00740086504726145	58
0	0.169888332472091	0.111052786059572	0.00692130952433822	73
1	0.288824384425397	0.180649175966754	0.0771921095079924	83
0	0.332912803424206	0.220807155515205	0.0857025076302742	81
0	0.436838995041447	0.323755966797639	0.165481040443958	79
1	0.296879100896019	0.150824663393052	0.0606164862794306	88
0	0.175026364910175	0.0244164266826542	0.925174115850472	16
0	0.180746616408889	0.0703462629891121	0.185039109919877	68
0	0.330717946112281	0.187599317913231	9.82532024048857e-07	63
0	0.408446369829143	0.264605540133045	0.115969961887321	89
1	0.433348225105058	0.381025463669887	0.118333504233887	78
1	0.244533766747746	0.198796668998525	0.016193522104161	73
1	0.416399685995912	0.193272140451458	0.236102124511509	84
0	0.057437892383981	0.0367898229420669	0.0209472137616816	62
1	0.363605812613271	0.158262859495919	0.165537529871826	80
0	0.0186187437896858	0.0425625500903238	0.0168372675548513	56
1	0.1304444561536	0.0608603420450343	0.0445146995957274	62
0	-0.0374064311469769	0.0342245843122312	0.00397895202021976	58
0	0.0716194961433041	0.0393720903995728	0.0224308928480087	57
0	0.216618339900561	0.14165966149778	0.0566529641887912	80
0	0.107304546429102	0.069784315094863	0.00912147959503978	62
0	0.209305723206077	0.105923531110091	0.0238640222929842	67
0	0.298454835274633	0.11779809510225	0.114167631047183	75
1	0.334541176512449	0.26490371778749	0.041118872294436	76
0	-0.0225535889291295	0.0213528989932945	0.0643834014770072	29
0	0.0628665327511643	0.0283374762427148	0.0257638867644512	60
0	0.163544666775023	0.0350925252240666	0.00392885787313985	81
0	0.0930987471965424	0.0524017933127387	0.0211323824601287	57
0	0.201772446068544	0.116271093264336	0.101262948565495	69
0	0.299762184242337	0.143459270635559	0.0964488490280168	80
0	0.190165268911588	0.102341158497006	0.0982156432340051	63
0	0.21277803583982	0.124959796294733	0.0976308717830324	68
1	0.236882131806323	0.0964250284982777	0.0469314002906919	84
0	0.143194228712679	0.0530618766878761	0.192938261995583	55
0	0.0931611191035903	0.0433565353764052	0.0173648487491163	56
0	0.145486717894546	0.0844407262427033	0.0471182723558594	77
0	0.137354202839221	0.0859776008344878	0.0272021597923001	69
0	0.226324522195043	0.142920694477236	0.00527978371415297	80
0	0.296089644976865	0.121242727990123	0.442179845580198	78
0	0.186581410048454	0.0865973136772436	0.0425741947754691	66
0	0.138519006913984	0.0944167433317876	0.0649294966532004	71
0	0.222433453827843	0.0632364018875946	0.00747988459221749	65
0	0.191846757084428	0.118770041495555	0.0573647224449386	87
0	0.191842598359366	0.106344864655634	0.142120299734775	65
0	0.197466987564148	0.066739929034786	0.129141599814834	61
0	0.0736091383393568	0.0362947662751224	0.0345849359569914	58
1	0.367919072143089	0.208728048539427	0.437579861878635	85
1	0.268807311390418	0.12673927263913	0.0414716166680883	87
0	0.215347038872141	0.115834520725167	0.0523868910527247	79
0	0.0562985902925481	0.0339832202330685	0.0638936017110697	64
0	0.108903632869276	0.0986939123133893	0.0448544935833377	72
0	0.15855926895928	0.082357667331618	0.0721930490288108	70
1	0.0536286979141198	0.0461302087271145	0.0219033281345007	65
0	0.0646096065704015	0.0233961208990141	0.0108994904146941	65
1	0.308988642817714	0.183288118110221	0.19883526548093	71
0	0.0552397301544608	0.0357620498286635	0.0462760413319158	55
0	0.230729872548419	0.118193680099693	0.113863572913278	68
1	0.238687045857708	0.100739871563224	0.0558545144304416	80
1	0.293121032178442	0.0325043610533605	0.129547020594688	85
1	0.206304350115698	0.0844329955334433	0.146713968491866	75
1	0.296029979981126	0.212269697735761	0.0332926256678973	70
0	0.240958908629635	0.180332068457477	0.00836515631990019	83
0	0.107223033178909	0.0533753981082679	0.0132681758895312	66
0	0.0168666355235916	0.0334710530749924	0.0151595355959486	55
0	0.062853745246662	0.0420551095106136	0.0253717462697467	46
0	0.0750935248791483	0.0680981608536517	0.0158034785513833	58
1	0.449621650552432	0.425662231139185	0.0883701404755518	88
1	0.388180374427781	0.287167220985932	0.016032106237639	87
1	0.374455049844437	0.273409417015873	0.197722517249554	95
0	-0.160690305156775	0	0.000632540911146725	33
0	0.151645719875141	0.0550778547030874	0.0130642568628639	63
0	0.402004136993208	0.221284440206936	0.0851651041163523	87
0	0.13553280510785	0.0484118598410688	0.0256352611393054	67
1	0.296492683492078	0.150033379352502	0.0451347437294226	85
0	0.11460509479272	0.0402879528858752	0.102341089296587	47
0	0.116103146949183	0.0176615213484634	0.0639631974381022	51
0	0.127264191195832	0.0657968800455158	0.0523731417837669	53
1	0.418609204037507	0.180101247065402	0.087967121364774	74
0	0.223335647506994	0.120625994646947	0.0536208692753204	70
0	0.168050032587156	0.0569348594064541	0.0162198776010838	69
0	0.0960053805677652	0.0237766734607802	0.0200824149591358	57
0	0.380547180886667	0.227185027938539	0.374505062197623	83
0	0.0694826586306978	0.0324248185719977	0.00382664126408017	52
0	0.126279558810133	0.0558428050790106	0.0434232540467208	56
0	-0.0335593577506295	0.0152894550223757	0.0118016986059824	46
1	0.268588302904924	0.11484879676676	0.022164513629719	92
0	0.114913308376699	0.0386706743407354	0.137219329897223	34
0	0.0298460259484343	0.023591409337204	0.00494315085903764	57
0	0.30800253431004	0.178221167012697	0.137448111405226	84
0	0.109023453673131	0.0538174510025359	0.0198087505759119	64
0	0.134370722631979	0.0153051389902079	0.0410285193603827	63
0	0.198284059556244	0.0546423656986887	0.120002560606088	61
0	0.0426779522120184	0.0328751923945863	0.0368284846241169	51
0	0.410367771394225	0.140238117738749	0.00732468914045843	94
0	0.134370722631979	0.0153051389902079	0.0410285193603827	63
0	0.0920473036504313	0.0366896834573582	0.0121297779647947	65
0	0.416628728284579	0.206366005176773	0.659096179034639	83
1	0.352306256759939	0.0998500199015313	0.0363896044624152	91
0	-0.00276001708392686	0.0290815093900203	0.0135270847447059	45
0	0.127955662646914	0.0493837611952723	0.044776499124902	46
0	0.316640051212198	0.162841505027132	0.137559819547434	81
1	0.54976203987129	0.187133069411142	0.914513290645578	82
1	0.469587319083074	0.493553654924873	0.0771354208054195	87
0	0.202249954062986	0.120169098833793	0.0496029320919213	58
1	0.603056306203801	0.453144360734089	0.566540470524652	90
0	-0.142451582160541	0.0077775080967481	0.0101720244298181	33
0	-0.124237052859021	0.0120170512459974	0.0140583601502444	28
0	0.0172452210715216	0.0306044064143714	0.0236358748627701	42
0	-0.0276888961834974	0.025455444682218	0.0117693210459023	27
1	0.711499654513782	0.29813694585667	0.959819373652147	80
0	0.0976085061827543	0.0684433410921619	0.00552830707674971	73
0	0.318992018372528	0.190094400373358	0.184337865840164	59
1	0.569593231438727	0.406382563708034	0.157375080898811	84
1	0.628134815941295	0.549889728411117	0.0668958484204708	95
1	0.356508765512251	0.193679747367125	0.0685601650572199	87
0	0.382030467002987	0.125125486631646	0.932976711008574	52
0	0.207437114640791	0.114362419343771	0.0113193254932178	76
0	0.00663261681470713	0.0293420854784647	0.0116518167275675	36
0	0.264939080721339	0.184449995628108	0.00267766222210966	81
0	0.0788704751431779	0.0643219971523158	0.0207244293840068	60
0	-0.0320746693661987	0.0166266021472947	0.0182686733836174	43
0	-0.0767973982081756	0.016764920212406	0.00994215161379721	33
1	0.63083685769005	0.55987536289328	0.419116835828243	86
1	0.574036463696788	0.113754033830765	0.102108883166908	75
0	0.197608445287246	0.111252774649449	0.00177172220140129	80
0	0.0127599333813092	0.031679617744193	0.0164203061477372	42
1	0.597533398230428	0.436052744743483	0.0984151044597388	77
0	0.200653343467643	0.101468486833574	0.00637826850082064	80
1	0.434124732757157	0.254812796569373	0.0574540142620085	80
1	0.451017977260654	0.332466285999769	0.225457679489881	95
0	0.252320017492252	0.18768120095401	0.0165283793682626	80
0	0.309513246918201	0.122527162309264	0.0296901556395898	67
0	0.100993650909425	0.0426668504960155	0.0149373579259687	56
0	0.32534642458878	0.286324569576843	0.0569911370027072	90
0	0.192502333917869	0.0931188118148215	0.253932060145636	54
0	0.129214996397276	0.0978894532356387	0.0228018022375862	59
0	-0.0174443062502302	0.034944355107011	0.0135749667059823	30
0	-0.0625297187814992	0.0275137533473276	0.00141076710008117	29
0	0.145212037027465	0.087757622597398	0.0722225263105814	42
1	0.0903759058985823	0.0425511040089755	0.00258283878656747	53
0	0.324606408059824	0.278279773971379	0.0812390506849321	67
0	0.129352377903776	0.0840971796306613	0.00698451987087555	74
0	0.0402737355930154	0.062156857802922	0.010131327574888	41
0	0.185669815805671	0.165543969288414	0.00971771128124796	55
1	0.306914585098922	0.237303039696736	0.00575777403817236	90
0	0.022383252452634	0.0415625367667772	0.00180840514221635	52
1	0.445282610940303	0.332666851338466	0.124992378463047	81
0	-0.031613700937586	0.0169510831929112	0.0216375511981394	40
0	-0.0159769163331815	0.0237798219825609	0.00781627718448395	49
0	0.157744259751689	0.120576689220086	0.00508911149864752	74
1	0.346588703023148	0.325373125652879	0.089738673064264	85
0	0.0877064754212979	0.0409864057376075	0.00433573091895362	52
0	0.295880509205017	0.189309265744892	0.0104651953390431	72
1	0.307942629155243	0.175671202739468	0.00545637217950076	83
0	0.283206652285645	0.152874428895286	0.0246014705327243	89
1	0.37383190379955	0.35547039809884	0.0108171119492124	84
0	0.0423884424957937	0.0450093730849161	0.019684944180963	41
1	0.495415311231101	0.491921783609397	0.0924911866922057	91
1	0.456201461157628	0.275731803794329	0.00488985959992137	89
0	-0.0136913131217301	0.035720454723217	0.0123072892781296	31
1	0.317036186580983	0.197939550113963	0.282833445067915	73
0	0.291558156220361	0.0855778718165949	0.0700852265586845	86
0	0.450682570201878	0.237010022620174	0.692483801650305	75
0	0.196705099693847	0.0730114848788648	0.134243427490255	58
0	0.126005258663303	0.0512822999812763	0.0357459438379788	60
0	0.119711752757483	0.00032390287135772	0.0504067886198157	70
0	0.297498954905763	0.147601844338095	0.0526373053929022	88
1	0.506273260911814	0.23641308431014	0.66054798331199	76
0	0.0796380434641885	0.0359150163332206	0.0738763562006632	55
1	0.402220648123581	0.309901223900914	0.0821944387390746	92
0	0.0112431885220161	0.0335369795503295	0.0038112558026978	56
0	0.138098385057987	0.0800010620256412	0.272765803951231	72
0	0.00914324063971634	0.0429281860384046	0.00862052837261434	51
0	-0.200274889802962	0.00438464157530363	0.0011734289170963	35
0	0.257776435189079	0.0920688793923261	0.0442519490383438	94
0	0.337770237953596	0.11772232931973	0.246521937740122	38
0	0.319277634757215	0.0826345790838201	0.0672713478394243	82
1	0.514802699866499	0.267761329416914	0.58474646124209	84
0	0.208075539042252	0.134383113012506	0.0855427931918725	81
0	0.434048958229743	0.228427882814189	0.421049417356361	75
1	0.416984829541301	0.198219444840737	0.255837696268988	85
0	0.315601969551061	0.159332215368595	0.0505191966463757	90
1	0.707683514163809	0.261488569166311	0.963077049047104	83
0	0.351101462003491	0.188395242435102	0.289715967179791	74
1	0.336532190337478	0.10342901915315	0.0100525063179792	86
0	0.178702932739154	0.0817350316544422	0.233093555959549	64
0	-0.058760977754626	0	0.000309556007593945	50
0	0.22839999089088	0.106737441495636	0.00763106966120774	87
0	0.109598827617984	0	0.00419061683944428	65
0	0.210084285792296	0.0581061977593769	0.0164520076830165	70
1	0.348745916752147	0.14436438846444	0.0249342409442946	76
0	0.213057932990928	0.16186335963779	0.0497706030327382	81
0	0.125648222810085	0.0519312195665998	0.0389227859647476	54
0	0.357904943113076	0.163009041455599	0.349723723161087	79
0	0.124058906140536	0.0602267365502345	0.0190877560146595	58
0	0.145030469884466	0.103061504437639	0.0510337567275957	76
1	0.475103785116702	0.195479553384406	0.641028556823539	90
1	0.256163343980574	0.131720389454157	0.285357443053681	66
0	0.281433947026583	0.0901304351765086	0.227979583548642	62
0	0.312772903518917	0.0824750596394455	0.162549455072106	59
1	0.358991794447258	0.211695385797633	0.131380221526226	61
0	0.125812716052718	0.107027657219082	0.0106519953167342	75
1	0.577156312533439	0.130003201400543	0.991420925624733	70
0	0.2771342256134	0.138858039930311	0.0966932223532516	66
1	0.340707088416562	0.195513934300918	0.00607542275137086	88
0	0.254980441787631	0.135990798750309	0.0465295021792495	80
0	-0.043115246368844	0.018990823790926	0.0080387542167606	37
0	-0.113720015248784	0.0086225018649699	0.0166040872016805	22
0	0.0954278218041984	0.0475897751112508	0.0125416289023278	54
1	0.463395163050191	0.315639536491489	0.0281342540684924	89
0	0.179087416872976	0.0236003199480591	0.0289252672740868	53
0	0.36827391407954	0.0517829144264064	0.858132510978958	43
1	0.305067488654577	0.145605629415887	0.0938083507565108	78
0	0.257091696678228	0.150780735028119	0.0281403772079368	77
0	0.378391821795942	0.155700035633445	0.444667822214698	75
0	0.264462692520035	0.116079573422875	0.129900722282497	76
0	0.0742475446344082	0.0573607868975553	0.0234277847561796	55
0	0.307469946153993	0.114061171741163	0.208597865385246	68
0	-0.0940563903898732	0.00731607987408586	0.103453593394461	29
1	0.161295583339122	0.0380177118317316	0.0559556447066703	73
1	0.437430562799397	0.258477779978019	0.627878224457013	64
0	0.265628119981003	0.0969655316443749	0.161237262148649	59
0	0.262544700921682	0.0613416436325765	0.0756680732934803	73
0	0.179956164327859	0.0730723470182972	0.253964457556058	53
0	0.041365287271606	0.0374180045286991	0.0203695770041616	49
1	0.267396990241969	0.103849061065225	0.0647332481451021	73
0	0.259855486305311	0.10558209444055	0.154186768745275	68
0	0.267226133880868	0.139285623170302	0.069227292985819	77
1	0.503128049044503	0.234197768232762	0.735267614234448	72
0	0.428984896641232	0.125823458300066	0.656298706494364	66
0	0.102951949169203	0.0524902381321153	0.00537994897118975	72
0	0.042424413779651	0.0436984921719461	0.00813400236614033	51
0	0.199455628601646	0.0705616178207062	0.125401765120816	58
1	0.261599658859292	0.0751521025330388	0.20295304954831	59
0	0.280791174352011	0.129262978616107	0.00815304824508261	75
0	0.316381985565992	0.219887448498831	0.188736060517931	85
0	0.452799378256998	0.0574592779454387	0.998493821148755	62
0	0.0706072035185201	0.0466941509173383	0.0126373346138734	58
0	0.236533297049436	0.0950167845667794	0.0905548522289258	75
0	0.181314197447711	0.0744325600636528	0.0301807644374345	60
0	0.172009306580657	0.0497835298577874	0.254528153403637	53
0	0.515520038659306	0.162687134815471	0.8505699270477	80
0	0.0111568508762664	0.0240657483261663	0.0146453619984762	36
0	0.359661468126312	0.139691415167118	0.506775356065802	59
0	0.215630299592712	0.0566434219982205	0.20896822730879	52
0	-0.0248510869691689	0.0229048345880429	0.0143757715482677	35
0	0.0677010700619071	0.0258128478325095	0.127301714407426	37
0	0.13206507311499	0.047109829998432	0.136466807857289	51
0	0.242787212022785	0.165314755238191	0.0555165538298715	78
0	-0.0737295601970599	0.0110306405052658	0.0155471614142866	25
0	0.315226418360845	0.172352286024523	0.579850590598394	85
1	0.471758894564824	0.16949767534811	0.337182375916894	67
0	0.146564999629266	0.0835057866764783	0.00396824615171226	64
0	0.198161931896185	0.0821349797382274	0.00394304993087531	40
0	0.272993548362272	0.157427977021504	0.0128364374781948	80
0	0.397194839316023	0.219138350164075	0.159423214009719	63
0	-0.248559537622478	0.0044009942542737	0.00395924858134932	0
0	0.176064390073644	0.0214404038887241	0.928720236488388	30
0	0.299798690221261	0.205023253785468	0.0232003559367515	87
0	0.0960924897548651	0	0.00104035444360011	66
0	-0.046208061543715	0.0263704302129418	0.00386230663036446	42
0	0.10159805393534	0.0520240159437555	0.024702622860692	61
0	0.199569283732193	0.0309946466773883	0.222743259306399	46
1	0.277221134364225	0.170884113723169	0.0222451075851644	86
0	0.204125033023329	0.0810217946070678	0.0502878750591006	74
1	0.350702491759194	0.100038175227413	0.65300764376333	61
1	0.225160149941471	0.0951613188447279	0.584272402162525	63
0	-0.00324519506467726	0.0199863428051837	0.0403954190240179	36
1	0.305588971897669	0.266178941401827	0.340495268501073	86
0	0.145787802765675	0.0987803726981711	0.00895476916665958	72
0	0.00834661596937943	0.0209286574624854	0.0223851296309355	44
0	-0.000516820465922353	0.0268795686255534	0.0135544540829009	39
0	-0.03179370483373	0.0143404677532394	0.00627559931341658	41
1	0.374871269352053	0.171989919446361	0.202337913765486	79
0	0.133631517254584	0.0839077545040556	0.0189527438094652	78
0	0.273631343697062	0.147303263502416	0.158998601438341	68
1	0.349297305801977	0.111475638288838	0.209519045846508	77
0	0.163633687682083	0.086631705771164	0.0898703556407541	64
1	0.546949115243972	0.310214099966712	0.732942464807861	75
0	0.306773425024509	0.176609268824099	0.00407637711950427	83
0	-0.0620407915406989	0.0142794595872332	0.0182523418316874	33
1	0.24466024990926	0.124823633492676	0.105284272114402	72
0	0.031855677847863	0.031921191513604	0.00830037214202049	49
1	0.417071436254759	0.182241357878811	0.430615386912989	81
0	0.30112228970436	0.143593190284241	0.255728034220102	79
1	0.190527031339623	0.139975787600477	0.0186472748344188	77
0	0.202704606345614	0.0532893462176346	0.281362941717476	50
0	0.27196288264684	0.059927014182133	0.518342077976058	62
0	0.172773423811849	0.0658368444929565	0.0536333540814316	65
0	-0.0648279693093354	0.0184988556436374	0.00568545796411092	34
1	0.314837831478308	0.187992896449947	0.0332151488621254	86
0	0.274376976373215	0.0418579785086107	0.0636882191909804	63
0	0.230854479961943	0.139975787600477	0.0214572490309503	77
1	0.334476617940161	0.126427222255512	0.155514851250523	72
0	-0.0283511219461026	0.0176013814822955	0.0409145308462634	46
0	0.468072680594063	0.0630356173184763	0.999538709001386	54
0	0.281250319990636	0.100418501603347	0.516651860309684	61
0	0.03282510777942	0.0485320574818967	0.0613107716339846	55
0	0.199987415404694	0.10923712794353	0.0244626277132031	71
1	0.5704506394574	0.400514785045217	0.336562470480622	78
0	0.265721265305029	0.199325417897095	0.111472773140289	84
1	0.400932270167646	0.117617767246566	0.10994287334543	71
0	0.324566175265378	0.125099451951914	0.252656715888568	72
1	0.226894760452709	0.124363815025424	0.0709672876718484	72
0	0.243309649907599	0.0705126436787245	0.280556489713037	58
0	0.289145549157174	0.128677004837331	0.215712541109047	66
0	0.174464242507771	0.0561721015387994	0.0965142286643847	53
0	0.174701960353253	0.0308500546217724	0.0257811863914315	44
0	-0.0961510162972919	0.0112087044164397	0.0061461156549939	35
1	0.269795144977026	0.0888133970619057	0.0747981403889495	49
0	0.221193343726121	0.101952690113	0.00935070429051268	74
1	0.445823751047087	0.1814454600968	0.524512354599973	69
0	0.240406644461075	0.102714101136985	0.0184986993123062	75
0	0.198236666913886	0.0618763881615119	0.0238360363490388	69
0	0.0732171693576264	0.0592252364425894	0.00246003185617731	51
0	0.228426484291872	0.0934617032728938	0.2457007358748	67
0	0.223503500044156	0.170019216267614	0.0181917302131389	82
0	0.13051410752086	0.0501274555823567	0.013330704799203	69
0	0.163511440800417	0.0910284764882827	0.0433919656235996	67
0	0.316874462301519	0.161569267453394	0.0742864061583946	76
0	0.348222056302167	0.181678999770761	0.0794935710681129	85
0	0.0315110853711055	0.0326095522924612	0.0360925463184461	43
0	0.13160315338577	0.0634644137010208	0.0629417402409959	59
0	0.109180906433103	0.0711668031767427	0.00642519152910561	60
1	0.495898235421498	0.198507677141243	0.216946555124531	66
1	0.346972429541657	0.293072745626244	0.142989016299932	98
0	0.211391291430099	0.060469834793866	0.0508509077618167	54
0	0.152825818794407	0.0575134261914433	0.0679367268989674	43
0	0.117890887458127	0.07836634007866	0.0231783824546099	64
0	0.00372799674758607	0.0297821979800849	0.00602641694847324	48
0	0.00282304224049413	0.0400886573243198	0.00218604488932489	50
0	0.0162750450318877	0.0366233073455366	0.0233479806648593	47
0	0.143754870642548	0.0765354824582371	0.0286801125074464	65
1	0.258732761614989	0.163626200469467	0.0197065299105381	81
0	0.191436639258536	0.0727568293454978	0.0973712877948639	55
1	0.324666738557469	0.10943358268256	0.581748691181709	75
1	0.353558422227101	0.20547393030866	0.034616368598663	86
1	0.19878540158602	0.089915536922655	0.0750654959527833	68
0	0.113312805585346	0.0617271064592614	0.0232028947033868	59
1	0.311721902201236	0.120862843089351	0.0604639520691348	72
1	0.451609088834344	0.25392545645883	0.468070778712593	79
0	0.215427020481157	0.112874969845275	0.0632753275409345	77
0	0.193358950832794	0.0712146104039433	0.0657666167439571	68
0	0.221893927991131	0.0468421401033193	0.823270292816409	45
0	-0.040123241040738	0.0144735838299571	0.0432054965333765	38
0	0.223412623830067	0.134576887633115	0.00928980109390813	79
0	0.127634210147625	0.0610993937939761	0.0370049737820672	74
1	0.437014075304953	0.245376637943537	0.744477675316001	88
0	0.198106104843407	0.102863712716866	0.0433394701984094	70
1	0.21404440695612	0.0699436059872193	0.0329264611335652	60
0	0.0618807036221586	0.0363432996661874	0.0108622845096568	59
0	0.16809430718033	0.0767107321144682	0.020451872722394	70
1	0.409296146362511	0.291874585096553	0.0631237618816228	64
0	-0.0327690389800224	0.0271410896518371	0.00371600969901533	42
0	0.16773787430796	0.150563426526026	0.0139751897954045	76
1	0.202287999820211	0.126351386922262	0.176131955338725	73
0	0.0921786729386598	0.0386610357863475	0.0571516648288753	51
0	0.146974516725606	0.0986452243704045	0.00160808652975156	75
0	0.218588608530516	0.126490447641659	0.147128201356088	72
0	0.155765103109271	0.0626675473776806	0.00809980169215962	83
1	0.49499199230854	0.161553742404013	0.948790069002304	75
0	0.00479027530798186	0.0161048641280252	0.0297390541024123	43
0	0.280518533517761	0.0791688623818429	0.352960562630042	59
1	0.329240047098587	0.178090012763494	0.0968679631154215	74
0	0.404671722694697	0.18068078191142	0.72566233133757	77
0	0.0576367871892097	0.0395210761140586	0.131728219867077	51
0	0.0821665517868875	0.0299989114820671	0.0783438374506764	46
0	0.264006964940706	0.0472808773660407	0.406604316421626	73
0	0.317665245961816	0.117230375757156	0.392563122921678	75
0	0.356850769386111	0.104153913973168	0.123043556335865	67
0	0.251236851397041	0.0739059038737132	0.695422940371247	57
0	0.0629163698029835	0.0381505533145488	0.0610910051815218	48
0	0.260845676279736	0.0976428815674512	0.457211683604349	64
0	0.340972846118937	0.103555777293456	0.3495326980416	67
0	0.289106949731755	0.115199019892063	0.0361231035416242	77
0	0.20104043375062	0.0953497561796842	0.0412497754900713	45
0	0.0638701485239406	0.0385220598789676	0.0188658106164128	49
0	0.24085726299418	0.105949556758557	0.216953010662365	68
0	0.121045204534365	0.0690785698321771	0.00323899504465599	65
0	0.237528469916571	0.0907503955384781	0.00766285018650396	77
0	0.192419650008536	0.140914652609146	0.00427222166655847	82
0	0.152428722751659	0.0744129606786541	0.0192428763364244	59
0	-0.0675649832599736	0.0141286382021444	0.0275822802931805	37
0	0.233807717054521	0.0981001829009658	0.0247959858127196	64
0	0.254469781312579	0.0907120850888533	0.518691306721623	62
0	-0.0527660455721934	0.0135731343661012	0.00240666692992698	39
1	0.414305497580271	0.18500589274926	0.298206517770724	55
0	0.0632373544223351	0.0373355692613523	0.0249330010355826	53
1	0.391182876743913	0.126035008979606	0.476273603688278	64
1	0.33247901340833	0.156740604564581	0.617266062571833	62
0	-0.04314536015388	0.0134158020817966	0.0198509280187188	43
0	0.0935541189320109	0.0473465661505766	0.0651004629015666	61
0	0.0136398362976976	0.0331553779849719	0.0156700190270822	45
0	0.293079228979037	0.173335689061858	0.247745457363234	72
0	0.225159844257915	0.0894819800991363	0.0841479776155403	70
0	0.243220520142674	0.123802390688818	0.0189848256661451	74
1	0.495233092062519	0.234701998220562	0.760316805347442	87
1	0.214929168543036	0.100141469311467	0.026366365681369	76
0	0.0731526128892535	0.0401310556948623	0.0105213681711154	58
0	0.0378728781263269	0.0272544290478203	0.0415916704807683	37
1	0.238834788377747	0.131456990547239	0.285514494003496	72
0	0.494091327450732	0.163051073869258	0.878939448929494	75
1	0.224072051045938	0.121966217371672	0.0812981099050805	74
1	0.086901922182506	0.0870709180404825	0.021076217464115	62
0	0.105883437307406	0.0660948990796896	0.00348651529600174	62
0	-0.0666390863362482	0.0196414741054162	0.0389422801124201	33
0	-0.158605704251376	0.00822724008796922	0.00165775492426242	19
0	0.119700712274382	0.0505667014236035	0.0354343599455702	55
1	0.429024414053852	0.199940147943601	0.756041873774475	83
0	0.0248929650115501	0.0279293089929748	0.0378818222224237	55
0	0.18724356462925	0.0732242680796862	0.0186822778541123	74
0	0.00582594839498058	0.0224635012606143	0.0864444702310723	39
0	0.163552252350883	0.0958481257849752	0.0823663001478152	69
0	0.246257702752515	0.290648955109962	0.00280173172245988	92
0	0.937404068685908	0.0666927078936844	0.999999997461144	69
0	0.22761929488437	0.10576568775222	0.048257469785396	83
0	0.150126921007645	0.0609113084939407	0.00953241600184974	57
0	0.173518718236208	0.0754470627393171	0.124227160037905	64
0	-0.00702121018070869	0.018229602782053	0.133323194832591	39
0	0.0098985530874633	0.0231700645102149	0.0408782879713084	42
0	0.328128638253217	0.14406988862532	0.278582472769853	72
0	0.340813233465756	0.0816817673152572	0.788322951078945	59
0	0.0537306454629672	0.0489245983743862	0.0271681236533227	48
0	0.145086345662424	0.0501241430287414	0.272237300861342	46
0	0.0919010013477873	0.0680928841040986	0.0945033822904685	56
0	0.366492190634948	0.149573558790143	0.233899842165694	73
1	0.280832740568469	0.176911027331277	0.113757571450224	82
1	0.277023554634795	0.204974097096741	0.036954866386919	87
1	0.359397503009743	0.237254613739363	0.157436222919093	78
0	0.116351138577408	0.0443257750791563	0.00189523781401442	63
0	0.0852587412349682	0.0319681634257022	0.0384910577672349	51
1	0.312550395289131	0.141428785391986	0.470713083364368	76
0	0.203517567450366	0.0687499909918063	0.00945924991233129	55
0	-0.0506780439842089	0.0195217350317223	0.145292305839604	22
1	0.310663274426951	0.105103492856047	0.491067721217529	70
0	0.241147787773555	0.14002434726618	0.0657292088439231	86
0	0.263913430162295	0.129353809408689	0.383485054341009	73
0	0.139397232147521	0.0460178223583411	0.187429650504995	59
1	0.243115928200967	0.0831676236336769	0.0844238251008935	62
0	0.199901532804312	0.0816608604385459	0.0579302381174697	70
0	0.321193264258725	0.148837167941475	0.31803564643979	82
0	-0.0315573839769689	0.0214394483884342	0.00607601958777946	37
0	0.123224654335292	0.0516818769964383	0.0128255446780321	64
0	0.378570414909841	0.155063848515868	0.2689485158267	76
0	0.123416426221647	0.0928983185935233	0.0219604947585576	61
0	0.26163191252696	0.0601744422918865	0.204784992394685	63
0	0.261733264299021	0.136674265909147	0.0596061557991045	66
1	0.232572178742421	0.212385519503434	0.0219260486334161	88
0	-0.1461673954579	0.0120674666547597	0.000696155573125653	48
1	0.421983573165591	0.269253350158707	0.644224896368069	92
0	0.0619775886784897	0.0419735016302274	0.00828142007796993	57
0	0.329154118451076	0.213142824473837	0.108334264872216	86
0	0.197846289211801	0.111401282183277	0.0210180437463709	72
0	0.324832841574409	0.179619929309815	0.0689967146285007	81
0	0.249745683638773	0.0971408311437619	0.0128794402755916	64
1	0.348131487756972	0.215380603120635	0.0838977005112133	76
1	0.369220444773366	0.209351395347735	0.038335845090243	88
0	0.155313869142255	0.0874210533990098	0.0128375528985034	72
0	0.17907938969292	0.132730117158477	0.0389027777263401	66
0	0.244783984518285	0.0456121810876412	0.00433176115172382	66
0	0.11431524590534	0.104527031821792	0.00698514411484548	60
1	0.465606561880352	0.153833105405949	0.380994394254479	90
0	0.303443505062709	0.111038310730631	0.0306177259605591	57
0	0.278548112195178	0.135567859295078	0.0101946027553886	69
0	0.285966225790039	0.251885021494188	0.0354728653743337	85
0	0.507041388954593	0.301609919308427	0.207306228651444	60
0	0.465078401013346	0.446267789514048	0.0654994838509494	93
0	0.0690939595409568	0.0340971238872901	0.0117499134314249	46
0	0.259800267081073	0.1863598423393	0.0689058117079147	72
1	0.555523386406234	0.471734506354397	0.000315666047192307	80
1	0.533634855232	0.371558956325911	0.20447282659122	77
1	0.439217246552399	0.39777168628543	0.0847446936839895	79
1	0.446418419267685	0.397171809178252	0.0996957317638575	88
1	0.406409223377268	0.349990016596344	0.0826253119812685	83
1	0.527119780015664	0.199563115100867	0.38622236703759	80
0	0.331063777700131	0.253631696568736	0.0346872513752891	75
1	0.48776645760772	0.413592637523434	0.0759093774219153	87
1	0.38986332716588	0.323671377444621	0.0189260247901889	88
1	0.625234078889973	0.518384322953684	0.500260041601596	85
0	-0.187576555080896	0.00852700489201886	0.00112673941421242	18
0	0.0649369412712688	0.0551552862647428	0.0568403066199672	41
0	0.0680694816725837	0.0555934831954494	0.00955840604460719	53
0	0.0219220620289512	0.0390383115489325	0.00131954231914064	50
1	0.412068202927153	0.368636439966712	0.000744576639138445	90
0	0.0842817972994484	0.0520688209091985	0.00619148296644639	55
0	-0.0680074971498888	0.0177660758350402	0.010923233474503	34
0	0.136786736096015	0.0808035042678286	0.0222509156461699	53
1	0.476347932805406	0.204971391138426	0.594500098157543	64
1	0.331289380989893	0.185558288383545	0.0658597052761336	93
1	0.151851279349328	0.0596568129831509	0.00637826850082064	73
1	0.36054015453533	0.240634795891248	0.00907325157809879	75
0	0.15469123611184	0.0904757960170612	0.0120933807994347	51
0	0.208885331533385	0.13367127517908	0.0193756959964059	63
1	0.595848457807724	0.330199941111228	0.862440556116581	77
1	0.311996312486185	0.183765550392432	0.0936679351318216	86
0	-0.116599619349957	0.0126598329552706	0.00943153693288968	23
0	-0.0493115732015046	0.0214874453927702	0.00636459390013608	38
0	0.148362068022807	0.0784235234373015	0.0844241342871789	52
0	0.309605557020535	0.192417412270675	0.0341112995301106	68
0	0.077356299570696	0.0562681258714047	0.0409759864202288	60
1	0.463816027598682	0.402744747762254	0.172192170106894	87
0	0.404292930682111	0.204612734168427	0.359020074662353	90
0	-0.07019679127291	0.019725102629909	0.017874922513171	32
0	-0.181396594144653	0.0121560085350339	0.00806567097891271	31
0	0.218131112502295	0.111091535793412	0.0085239079732588	71
0	0.150075092747598	0.130142975686725	0.0128683841643568	78
0	0.29843676580962	0.0759221245022323	0.677266968760827	69
0	0.0895800718437579	0.0483188847048975	0.0290846168471345	40
0	-0.00306382356713903	0.028057305775856	0.00998199740078356	47
0	0.162172876699267	0.0985159202091806	0.0190721469491311	50
1	0.36007762310733	0.201104789180131	0.0125665582322141	86
0	0.0524733092303153	0.0581827179105811	0.00470258185365014	61
1	0.225413779882706	0.153401195121353	0.0562932988966446	73
0	0.152013597410198	0.0684433410921619	0.02864842759801	73
1	0.752624730427683	0.543314306375209	0.120928166013204	89
0	0.224778021045695	0.171892638099972	0.0579040434576539	66
0	0.264809721322939	0.220095816096908	0.0125746264040831	92
0	0.157202956779473	0.0945054099979241	0.0195890724145675	49
0	0.438608592910939	0.262579108628878	0.392491826474594	80
0	0.200417076087427	0.154231019039508	0.00288658632542991	69
0	0.453130438268662	0.36519334265953	0.180117751765187	82
0	0.190377867437169	0.124786516576768	0.0248566317410494	68
0	0.302953182758476	0.246931812535696	0.0106348198091979	72
0	0.200177648445081	0	0.0114419615769207	85
1	0.390567957105487	0.231447425880779	0.316866464368893	88
0	0.436199624542383	0.34253270423276	0.0469161948261931	79
0	0.229374705368282	0.140037446417124	0.012200655354854	78
0	0.0973210112557853	0.118623649814817	0.0135373891500739	57
1	0.307989322405499	0.102198267313086	0.111552555341826	74
0	0.0411349851032789	0.0404322285845134	0.0177329292500568	55
1	0.516098372960184	0.441032520014623	0.181181992954585	91
1	0.370252465450914	0.180091957887411	0.445620980211706	80
0	-0.0964251204772726	0.0131141738878517	0.0191892383763699	24
0	0.0527905273858944	0.0522509423275198	0.0122211604128357	46
0	0.0407845059265004	0.0497729412869347	0.00739080768977694	45
0	0.194608725333558	0.0816390249228905	0.00688651470908357	50
0	0.24946852608	0.170665534629571	0.00298885994896192	63
1	0.19663572850211	0.0956210275286378	0.110313787022668	75
0	0.12929398604462	0.0772108531178692	0.0322895298585455	64
0	0.388035893292888	0.344203285015623	0.0304277516851929	90
1	0.516952308298787	0.336738513877741	0.277904491044232	90
0	0.0621212931022134	0.044729259651026	0.00392999292878692	49
0	0.0614847027864183	0.045697297887911	0.0161092707084197	42
1	0.480742806139284	0.392141922643461	0.407347904998405	77
1	0.8874467664982	0.330327294647022	0.967623185217046	84
1	0.443046843034692	0.468213518499323	0.0608130633263032	96
0	0.134959926492716	0.0725603986301128	0.0112589408998696	35
0	-0.02685640631335	0.0280785068023602	0.00648073246467031	47
1	0.835664519200094	0.56617226959542	0.953557747729393	86
0	0.242765931035856	0.234062205812241	0.00816127657799925	85
0	0.216392988558766	0.134908990528321	0.0226098574747089	50
0	0.441136741533431	0.440144664297819	0.0561903263018349	83
0	0.431264867033989	0.18272287125732	0.511265613878645	82
0	0.169588496620416	0.0967337763500888	0.0292335209134562	79
1	0.625671951215192	0.398454856565309	0.626361770360209	97
0	0.230594156008137	0.144625588021411	0.00968447116247732	81
1	0.552643818611741	0.366161410558708	0.0695339856102659	82
1	0.387435727118096	0.232018359730476	0.0198162078346569	84
0	0.241620579568109	0.0663987517603513	0.00929546218867387	45
1	0.342986160839058	0.278664403911088	0.0432485506743745	90
0	0.203350448139387	0	0.00956569763245987	81
1	0.452459503040588	0.409665255594719	0.0190884300692183	87
0	0.148365382759922	0.0721880199554653	0.0517717840136666	55
1	0.552541060427744	0.383289735090867	0.0330549635425066	89
0	0.21139003817055	0.129124469556453	0.018395725561723	76
0	0.301876870923749	0.176303199776922	0.0168265109803099	99
1	0.248340443553189	0.187231679777958	0.0624156947776316	84
0	0.204424667450689	0.102471296663753	0.00413452424901912	68
1	0.431884322945954	0.345113949758803	0.123964659006733	95
1	0.357634985493582	0.174723129487827	0.0218278304185784	73
0	-0.0714324368990659	0.0142865894969551	0.00823306381630457	32
1	0.429651628327605	0.368674482023724	0.132590021065759	90
1	0.288471428893298	0.163717358212479	0.0726047277739976	71
1	0.261579695958962	0.121693389225327	0.067178543339803	72
0	0.0223522444861723	0.0192782813917936	0.00593131762317203	38
0	0.142064931307761	0	0.000522245704722972	76
1	0.264139692846095	0.156793365091917	0.0829305331309886	83
1	0.244046242869945	0.204833225913243	0.0410964041488006	81
0	-0.0401724737408557	0.0167498875797486	0.00657881613399659	29
1	0.190639930316149	0.103662223111621	0.0356718481222382	75
0	0.138241849814938	0.0893480147751965	0.0199018521598217	51
1	0.639089484459517	0.334640199214254	0.215849496088164	83
0	0.320029203281839	0.241649643644942	0.013619226979573	71
0	0.157845655305933	0.0752091655314679	0.0272206894657026	40
0	0.0824629759689478	0.0594674061016978	0.0706334158625788	53
1	0.346832605864233	0.240644067704167	0.0124679214789149	96
0	0.403987633535724	0.336125559915297	0.0727516455447511	93
0	0.472877198362656	0.318848313764068	0.283255573851757	79
0	0.252687044831858	0.182546068365438	0.0272943999292604	84
0	0.302464167766388	0.226382617137005	0.00694785692952679	76
0	0.165768956717498	0.0629161897869924	0.0058837495381841	65
0	0.168978634000142	0.0681536148894544	0.0111133797740872	64
0	0.154161689347376	0.0695233188690674	0.008036362329999	73
1	0.228604441121255	0.160465112283666	0.0406420927711564	82
0	0.237374879721876	0.144894219035543	0.0393097326304455	60
1	0.268639300201872	0.19019284027236	0.0401220563820497	82
0	0.300417589945541	0.207585387755653	0.0338761818986145	79
0	0.132891005465283	0.119372914613506	0.00385550624907124	60
0	0.312072963754751	0.16486986690449	0.0059858688887895	87
1	0.396032242695955	0.234512455148874	0.0120560433299057	65
0	0.182799882620572	0.064423216021513	0.0040900489009441	69
1	0.523639835113197	0.437300281687669	0.0344296810674256	82
0	-0.0735315533701202	0.0146372448153135	0.00029078664288146	33
1	0.313092152753507	0.208493069138568	0.0221686102435412	89
1	0.702142929187618	0.260583395825023	0.919827837554742	82
0	0.228816997085446	0.155657909465499	0.0184920370551159	62
0	0.366991407556276	0.236862947589913	0.040313900481319	68
0	0.293478987828853	0.207652490645388	0.0308898713020125	67
0	0.12864702024783	0.0688312955297156	0.0163864241405983	64
0	0.201752150945171	0.217312655289392	0.0148935728340108	72
1	0.392618249497272	0.220598475431286	0.0804151482755132	85
1	0.320274323364044	0.20246683316098	0.217468542202143	87
0	0.301213419061247	0.23374260771053	0.0197106261880462	91
1	0.2041406895943	0.046408039980019	0.106364145060222	47
0	0.144161291324876	0.108364971923834	0.00317176607892048	73
0	0.2769256979856	0.268703822634669	0.0403905706220346	79
0	0.297063141110955	0.218632774638498	0.0146930312864504	75
0	0.0559302843710622	0.0383832717144648	0.00933161349800237	57
0	0.383567286866503	0.230196126483717	0.55178985574578	74
0	0.246277891011148	0.0897047496397385	1.65259052380371e-16	69
0	0.201928358184112	0.0945395676289277	0.0139283880602612	73
0	0.415117238344874	0.192631253993927	0.730069670782258	74
0	0.144634729669076	0.054716719911269	0.300332943633511	62
0	0.12097723793435	0.0937700980052004	0.0389523488956682	64
0	0.113933818524356	0.0355290546742135	0.0109221009201991	60
0	0.170006663432831	0.0412222714133505	0.0428446947765462	66
0	-0.00783382093955601	0.0245773138377249	0.0133188065780331	50
1	0.360796514601134	0.173564343840266	0.0232787603484493	87
0	0.158138205358786	0.0697203812567106	0.0164533621868414	73
0	-0.0552679979183864	0.0101546578353681	0.00888558292390558	42
0	0.267243291997187	0.0684640139563861	0.866429357368327	67
1	0.170170923527417	0.0754233290753827	0.0405303379820956	70
1	0.10818118918154	0.0649994938986261	0.0636255746598002	49
1	0.468357508057764	0.317195322429682	1.2152170308848e-28	89
0	-0.0938338933461197	0.00891931697220522	0.0187254281337117	30
1	0.372024472388633	0.19001799270991	0.602264638253648	69
0	0.221530259610489	0.126238654315942	0.00614764292877781	83
0	0.027906299799273	0.0274994845180766	0.0353141109614818	48
1	0.447283938338036	0.345437064688055	0.503077481949626	78
0	-0.00292369220782135	0.0191872217262445	0.00979529121125756	47
0	0.0356188950522591	0.0355824900573675	0.00296899630044223	58
0	-0.132716702310151	0.00582434073628483	0.00523432705142583	28
0	0.0699216139184608	0.0308938129018605	0.00595233891654359	75
0	0.0124014678882991	0	0.00257547392588436	58
0	0.0267758889677964	0	0.0642582195347999	55
0	0.245796839055564	0.0850448169665337	0.0189069464972988	84
0	0.0544518465683119	0	0.00452538973139189	47
0	0.12047904748205	0.0679417035161242	0.0117290884121752	65
1	0.333914160031835	0	0.0114326111227505	87
0	0.561315762852778	0.195418236756398	0.195086175703112	83
1	0.543115694243525	0.365424794893743	0.127274165148919	82
0	0.182563625922478	0.0722900966075938	0.00267657021287487	79
0	-0.0384008055719589	0.0251922386657181	0.00465846508362688	35
0	0.278586593645362	0.217312080178781	0.0113215191782043	89
0	0.168959450730339	0.0257908588094819	0.0280440271785428	55
0	-0.0571476762941453	0.0122398302569197	0.00171157213217211	47
1	0.402612478446432	0.219437483846335	0.0435487077966303	90
1	0.40552721392161	0.154833989025316	0.0417623806805323	85
0	0.238666531476246	0.120075661599271	0.0594046836910048	78
1	0.0969962395374146	0.0425979720265004	0.0183780377349151	61
0	-0.00166617553414356	0.00987371262828348	0.00940904790673944	61
0	0.091514449807798	0.0257926462367133	0.0151255334270144	66
0	0.259624039715116	0.106501008441801	0.0882558109026227	85
0	0.00974436711082748	0.0199306338658557	0.00959283266240881	49
0	0.214430830343941	0.0586043342387049	0.029001428302387	82
0	0.101083728790535	0.0729694633711797	0.0212233825747168	55
0	0.20572587415252	0.0246347955340608	0.0266594716949729	59
0	-0.077441527743365	0.0104666854262362	0.00206563480555074	43
0	0.0912392265702532	0.0457772741246032	0.0441621618854658	50
0	0.200643714417228	0.0843783132563739	0.0822463553574002	62
0	0.0471098153789649	0.0237516185620382	0.0118083480347132	55
0	0.185765926109932	0.113780165907053	0.0192437067478642	83
1	0.215271892770892	0.0985691412549428	0.0568542466924875	82
0	0.23330943103673	0.042094023582471	0.0157026301380775	77
0	0.456851534468523	0.333499631064177	0.0413666834017297	97
1	0.659583557954254	0.448011932423362	0.369535780564651	92
1	0.661827667726975	0.327741239429796	0.788093427940122	65
0	0.3289635593759	0.0922270540088922	0.0227168182349513	53
0	0.47282960828673	0.258296686583566	0.00515353345292007	90
0	0.35224707988001	0.178448848333314	0.0252541341212061	83
0	0.415817335801952	0.205484230814792	0.213893082726188	84
0	0.468731976073636	0.214048888245027	0.675438941554363	90
0	0.0358555644539708	0.0286462161670106	0.000604919589081046	64
0	0.0256813699783483	0.0307670415929382	0.0139994343921893	60
0	0.2627878975207	0.115441254681564	0.0172693823093627	84
0	0.220069288066371	0.106202277534857	0.00923158633227136	92
1	0.279689465782042	0	0.00498343569154188	99
0	0.0431383699863256	0.0253823145787895	0.00215820062240571	53
1	-0.0128066638369581	0.045361817816741	0.0156683519875523	58
0	0.248953612791569	0.13059491642245	0.0137337516903526	86
1	0.477649470373949	0.229456135208855	0.212553800228384	79
0	0.137750777086612	0.0352279144546319	0.0287401251524163	77
0	0.268670476044907	0.165306757036712	0.0369596007900619	94
0	0.225613545888415	0.112913669590214	0.00127875351928632	90
0	-0.0951189633465598	0.0154842404405457	0.00195629846163339	38
0	0.0335280268525315	0.0371881412507263	0.00159684077532378	69
0	0.14607595576052	0.0897845912326199	0.0172425699769443	72
0	-0.0672828954127821	0.0246070323733789	0.000288572117136096	55
0	0.297822508468605	0.181004377457529	0.0392509151604582	75
0	0.0357609604714628	0.0307399617204018	0.00781465651795593	59
0	0.103695262970528	0.0476317161955757	0.034797112479999	68
0	0.129045856860062	0.0382597967958942	0.0177338001946815	70
0	0.0668375888247181	0.0446720216374094	0.00314969837133403	70
0	0.193259792813732	0.126118957625384	0.0741454175657569	71
0	0.131337366246013	0.0709690872316786	0.0647707292279601	66
0	-0.0699471965754207	0.0225873967101454	0.00597748468133523	44
0	0.0889082963184125	0.0421467459785604	0.0261922352063382	61
0	-0.0295882623564463	0.0235967825187809	0.0151435541615761	53
0	0.247908920349557	0.114854736527177	0.0309785740636028	82
0	0.194189635339965	0.0740603979959995	0.0149577803040381	77
0	0.267566189072182	0.123103901354986	0.0548082588142536	80
0	-0.0982979974888065	0.0106360717560118	0.00257497048216078	34
0	0.276415411518202	0.161355829955666	0.0746667601490971	71
0	0.11375953659766	0.070998253347636	0.00172711390972912	67
0	0.0925069719869242	0.0468104881739715	0.00908870202064225	59
0	0.113750950592044	0.0433445251183744	0.0101778364666213	61
0	0.157201982549344	0.096002352671813	0.00890188117687555	72
0	0.0087510921654262	0.0251706313100136	0.0230390311574854	57
0	0.345369129836358	0.0702241672013536	0.220426299941979	75
0	0.0420573105146623	0.0271693524264929	0.0572517043090143	57
0	0.104806450555819	0.0368389654951792	0.023860924316584	56
0	0.112361479559134	0.0391292612922675	0.00161080372059355	64
0	0.119100627641736	0.0672297290727021	0.0168535973541599	66
0	-0.0546217913893339	0.0144023394944713	0.00654417720552198	50
0	-0.00439981685891939	0.00983598840897606	0.0154444452680985	57
0	0.020855567324238	0.0163783295586393	0.00511311664307339	54
0	0.00784000488453428	0.0194122513194687	0.0047870140895164	55
0	-0.103666604163192	0.00563481586273864	0.0475818440542116	26
0	0.416349258927697	0.362403953606972	0.0199133052732564	73
0	0.0665954320640263	0.0443824205017867	0.0422071082862284	66
0	0.03888462323941	0.023652880741195	0.00946298918338221	56
0	0.134872007318973	0.0663909019091887	0.00408452105539304	76
0	0.185705784693583	0.0693076657678963	0.0349183942608007	78
0	0.259803844187889	0.142275642832895	0.0200773777254708	90
0	0.405531045517578	0.28818126442296	0.0138152055715091	100
0	0.290718188822214	0.161884779932959	0.0038854017642171	78
0	0.233730692312808	0.14721660727814	0.0623109676050247	71
1	0.576290229749068	0.145009280174432	0.397003271352221	83
0	0.110304328142799	0.0213945567331672	0.0219049367436848	55
0	0.203268797808072	0.153108907980524	0.0366472973000572	72
0	0.504737550237144	0.230350613877258	0.261655348258621	75
0	-0.155079411059919	0.00511624650486031	0.00836092683842108	21
1	0.359697437704884	0.271407920889204	0.027826338390102	95
0	-0.0645722194960961	0.0186348664788706	0.000997183654422607	50
0	0.161047570802274	0.0634267010856869	0.0949804971036839	61
0	0.109931015713545	0.0511745572324378	0.165912479964591	55
0	0.363312546262872	0.142463848966594	0.604850963075049	78
0	0.0724692487355189	0.0238217844335584	0.0442539791810287	52
0	0.222464142247952	0.075505629954212	0.188385066036381	59
0	0.236293487556619	0.0845218952119928	0.524039471986295	61
0	0.238495863328447	0.0758786362302091	0.0188819410324915	81
1	0.38173893008156	0.272258529276114	0.168080322874804	78
0	0.281658635916065	0.111090442342535	0.264643278463715	67
0	0.0458391833138109	0.0195590620764885	0.0920423518866925	40
0	0.314606588375109	0.226823085129779	0.222173321429403	80
0	-0.0182278454030616	0.0202813217076605	0.0248506454650706	47
0	0.193947344979956	0.0753294987531682	0.0302177249428517	72
0	0.0589418553131497	0.0387391546733432	0.0635629280408277	53
0	0.218779059089939	0.182878686769723	0.0355207968958693	68
0	0.0741982307632067	0.0419943020126403	0.00204053645423214	79
0	0.309552589462604	0.210135434433587	0.120066781424789	79
0	-0.00333331935490235	0.0292231958889081	0.0112563919166	49
0	0.153369221799086	0.031428944362372	0.35923962393974	56
0	0.0366510075471115	0.0249743232264732	0.0132165873551964	55
0	0.0817003186285056	0.0456282785471456	0.0340211379315165	64
0	0.48075880207613	0.131165859855986	0.791842101041528	72
0	0.1563291578871	0.0698999851674012	0.147369676505923	55
0	-0.0907772128058173	0.00885654398165696	0.00301177330875354	33
0	0.181229391196692	0.120225500468638	0.0730189642019881	83
0	0.231866716738384	0.114971756683552	0.229107268995292	74
0	0.11020502476186	0.0417024614941702	0.0900229356510553	61
0	-0.0731720037166172	0.0149141858067331	0.00880476110798483	44
0	0.197635346875553	0.121523444480266	0.0112403319876723	72
0	-0.0250355828755872	0.0228683990429087	0.025086719614655	50
0	0.144076009532997	0.0664210508484948	0.0713533566276893	75
0	0.125325706979591	0.0464816595745003	0.0966280835966097	47
0	0.028034336191675	0.026269857340118	0.000741167169149961	61
0	0.263898591728439	0.130277022733754	0.147257745421357	77
0	-0.0580210922759203	0.00929265409006681	0.00171685140597386	50
1	0.239613680523163	0.129262978616107	0.0459110333911384	75
0	0.179571801932302	0.0856854927051545	0.0183509691108467	65
1	0.554633243709535	0.269764380386481	0.650171578106286	85
0	0.221196002983039	0.0623934986398465	0.0046545532906196	82
1	0.29821455824614	0.197579606036151	0.0124695835134995	86
1	0.359697437704884	0.271407920889204	0.027826338390102	95
1	0.454329073897235	0.306881134022234	0.147617518958617	85
0	0.154887839037919	0.0883069849232493	0.00452248949450311	82
0	0.121959534755165	0.0554105948032225	0.00117954541250046	77
1	0.347689061986712	0.25360233696525	0.0270682769961686	93
1	0.281642995536765	0.170019216267614	0.050466960275123	82
0	0.299655559114023	0.190387991450471	0.0242319839944137	85
0	0.257623088120441	0.0822790090222253	0.368737932219232	57
0	0.198825031396176	0.129787718844448	0.00397426639934137	83
0	0.0878061056434379	0.0266959951664066	0.00921413314211449	58
0	0.0888008750246834	0.0466815292341984	0.0123474071357225	64
0	0.111146761270389	0.0165608372225575	0.352635418493923	52
0	0.258239095746404	0.0488619156458259	0.0676465316279968	50
0	0.0569498510099229	0.0480099010714517	0.0337466499029785	55
0	0.211915377846634	0.112434342313975	0.0685297740966838	77
0	0.183912593574365	0.073971927431945	0.0112598426419164	76
0	0.234854659581414	0.151914340127499	0.0307423014202801	62
0	-0.0374400319376979	0.0200491185476557	0.00633220819043188	47
0	-0.0907772128058173	0.00885654398165696	0.00301177330875354	33
0	-0.118170000071182	0.013877390086499	0.00176015637574999	29
0	-0.0895385429226935	0.0149731784835419	0.00557347256212463	45
0	0.362625328515879	0.0357782252509328	0.930885586800719	38
0	0.187931510615107	0.10945555778205	0.117673958075705	64
0	0.177227389307037	0.120952668758602	0.07703709985285	70
0	0.109959777511456	0.0601275155893437	0.0140977233809941	43
0	0.0258919524506223	0.0331380259247598	0.00897777469202721	47
0	0.227392189726486	0.0949558826278516	0.111625431816561	66.679109811566
1	0.172427219412961	0.0953789352856748	0.023354640024597	78
0	0.0664362020183583	0.0294487746162423	0.059680862556357	40
0	0.0215378611578253	0.0393064563063606	0.0144950360125941	53
0	0.187702630453125	0.0978178971515203	0.0293034139688803	68
0	0.0940831844337589	0.0345370981659963	0.171913536649158	51
0	0.0692077762077055	0.0480691618723677	0.0117250436620711	66
0	0.209028748223492	0.0568241739158716	0.49255507108549	41
0	0.341420039598401	0.168929201928063	0.410520538875121	79
0	0.20764214659841	0.109365753147325	0.0718191183313152	71
0	0.0474419311518988	0.0294415829492561	0.0197572076974754	51
0	0.0155150973516708	0.0393164291839415	0.0121472010978542	51
0	0.0425101676413731	0.0248415168712377	0.0140383731460768	48
0	-0.0626128459356239	0.0169690013590606	0.013702497547655	55
0	0.0678489799315272	0.0492034981136645	0.0502914093430617	60
0	0.483193629024245	0.164138613046636	0.886091040007953	85
0	0.262121293786036	0.0729191541200742	0.583444611252444	57
0	0.25361388934076	0.0754911456202812	0.0430907205471708	64
0	0.0797402648653695	0.0536679383139528	0.0116758870210419	55
0	0.155683770992072	0.0622104778756958	0.18883382217439	66.679109811566
0	0.106400668797794	0.0466319073203263	0.103766861054543	60
0	0.0569963557780376	0.0304296691416033	0.0969033126347306	52
0	0.0828088124874139	0.040049059148156	0.0124912258421355	59
0	0.293413249454184	0.137192658943669	0.144836282251901	83
0	0.334670810293942	0.222739505011378	0.196162313967267	80
0	0.220916432858119	0.0694473250711532	0.0884126858548191	70
0	0.0038792236998665	0.036721879038226	0.00122845238635193	63
0	-0.221446166720271	0.00353058632451013	0.000390525020386243	24
0	0.330090291869336	0.114201191300841	0.664935093092584	67
0	0.347020334442983	0.218705466001561	0.224107189698426	85
0	0.195462720529585	0.0886448063224066	0.00163168356870572	87
0	-0.163712663527786	0	0.00206565541933296	25
0	0.205418267723454	0.0362207388730688	0.389971999840329	46
0	0.124615575795582	0.073492483132929	0.0294228327071734	51
0	0.106532610202478	0.0607864989298674	0.00155275597348193	59
1	0.26928438290008	0.138521138232546	0.147976590082002	96
1	0.330122291567302	0.131255188834577	0.126261093107503	64
1	0.264823601301735	0.141648956355604	0.0230097211480575	86
0	0.113884886076771	0.05156314213993	0.0789288904036382	53
0	0.20889235863515	0.116781651458594	0.048134254914331	82
0	0.179495517885981	0.0521533705527715	0.162601190014814	60
1	0.430730767710926	0.162915633084127	0.917837403257052	84
1	0.836845262152329	0.189740056546242	0.999901127471378	82
0	0.274964821309768	0.14449305074403	0.114656709676197	85
0	-0.074931047577653	0.0133627187748035	0.00108719887700023	42
0	0.310585577945563	0.182032989900436	0.0308770015527868	84
0	0.189552818763051	0.074269186489786	0.0242001203737642	71
0	-0.0888943725719759	0.0103970113038498	0.0108042793612853	40
1	0.590786151832246	0.236359869088974	0.33013161743453	91
0	0.125334347086829	0.058555279606272	0.058088702152854	52
0	-0.127179128296067	0.00446566954953687	0.00325358178130361	38
0	0.299191625443863	0.207447916476023	0.0494922644462852	90
0	0.218973039973534	0.221586979045375	0.0979131520718545	79
0	0.100985969022772	0.0439278257169292	0.0117637395680514	60
1	0.418830624058395	0.134249613033573	0.606062317226416	89
1	0.525996966353039	0.163735410553091	0.914291706777806	69
1	0.549722014315997	0.155707864620878	0.954471969431238	70
0	0.1357233698924	0.0640726131769605	0.0113697967902474	76
0	0.311109905938209	0.134529348986454	0.0738292965383229	76
0	0.266999865962301	0.169132976091535	0.0399424739558895	82
0	0.0779723898220412	0.0300886195535403	0.000770700347540058	67
0	0.261203977506808	0.0931575424750955	0.0975771445301517	67
0	0.11404632770775	0.0666731064597459	0.0535617813021454	66
0	0.516419429861607	0.199412153408678	0.881674129064103	76
1	0.274855144403073	0.140277308965825	0.0990290372368105	81
0	0.195377510129807	0.0678933852318461	0.0330118415826432	79
0	0.338480983355109	0.177033395604705	0.135056623910199	81
1	0.277276426636372	0.171399459021866	0.135079988881949	70
1	0.671693963848092	0.113724982815468	0.140874046665402	88
1	0.149550862636872	0.0693000647641207	0.0374329837633724	60
1	0.152417516274665	0	0.0221994648057773	75
1	1.19099782038364	0.485902085927332	0.998849504420694	85
1	0.449003624364544	0.263863960034261	0.383845428846095	89
0	0.93717792943261	0.114069408047696	0.366797388062109	62
1	0.311663934832196	0.204974097096741	0.0249126474178178	87
0	0.282456423534726	0.0755594971598769	0.323514334730557	58
0	0.325474706302333	0.135964075872068	0.127609879449264	71
0	0.290935933509289	0.168483396192158	0.460222735852396	79
0	0.0865592144315077	0.0713927287647053	0.0145076979063031	70
0	0.021581956717039	0.0356563729849688	0.00706481950980616	50
0	0.0787258546991241	0.0490853044999344	0.0684983109020386	54
0	0.152436598274263	0.0484151043812154	0.0233084959472968	72
0	0.0719662348679192	0.047890222895752	0.0591481754890168	50
0	0.0709395697310224	0.0307297525037854	0.0145381108733305	59
0	-0.164546739768584	0.00320853203973298	0.00240850915440289	31
0	0.272606193723903	0.190389234917678	0.0405008714227595	79
0	-0.0823748072236268	0.0118980583161428	0.0164399084181445	32
0	0.122682600142159	0.0706325078772707	0.00433461729282392	76
0	-0.127767808630458	0.0128767149023003	0.00856846817292388	26
0	0.149664990088111	0.0750425926728244	0.0051227349231739	84
0	-0.140617802716778	0.0137595838616038	0.0108253862565091	29
0	0.102922734830291	0.0469851287488813	0.0189737473179138	66
0	0.0835698580808491	0.0719775621921596	0.0051758319487106	63
0	0.198974531415172	0.0668886451926682	0.507864997030349	52
0	0.447135246061066	0.064233291101039	0.990787511494397	58
0	0.330570641692645	0.0848660027248278	0.127181446008471	65
0	0.209073990592308	0.128726914089328	0.0871251729163032	78
0	0.269509023821541	0.114863478573715	0.0341638242167692	82
0	0.0927158773977375	0.0660406035218117	0.0235903862751055	68
0	0.0884262394591625	0.0551630393892487	0.0982633038350643	57
0	0.184524508767202	0.124041320652611	0.0217299573682503	77
0	0.174237978664834	0.11727250820874	0.0403433141602394	79
0	0.278055256352947	0.134212468897687	0.236064206409705	61
0	-0.204454290655214	0.00580511689922383	9.7591270242479e-05	37
0	0.242589702363019	0.0697226707618225	0.453801913508912	56
0	0.27459054645028	0.100306186928541	0.114506874478616	81
0	0.00961626176536751	0.0238723309616997	0.00468985878199951	55
0	0.359922090893216	0.12144613753939	0.168056413416844	66
0	0.183574315606984	0.0551313521625605	0.148216932667607	73
0	0.123082453394649	0.0549122372402702	0.127209644285335	56
0	0.135177653519081	0.0488435319743695	0.0551250986042945	59
0	0.237660203467115	0.0911870983412324	0.12885744490054	68
0	0.498633001974116	0.122288827910088	0.924584049783995	75
0	-0.0590472727222308	0.020388506747735	0.00336842155983268	45
0	0.175167981797023	0.0891564909054248	0.0196930314387789	72
0	0.190611115872033	0.0876071587811812	0.0767972589012906	65
0	0.196714287342953	0.0962562750624753	0.139203657619263	69
0	0.0752261515753584	0.0237641046865274	0.00796011460035965	64
0	-0.0395526971930707	0.0134827149293693	0.0166158967555961	41
1	0.68079892500359	0.272754138293116	0.318105958726304	82
1	0.22208181079241	0.122054661807256	0.00998525910604355	79
1	0.251295388960201	0.137760934781136	0.12637253921296	76
0	0.133317558994386	0.0680452817725545	0.07948829658351	58
0	0.1035709147158	0.0642178771753002	0.00980654884994867	52
1	0.226432022139084	0.109998360097414	0.0325927426510012	92
0	0.0464738918267483	0.0285070523250016	0.0169242292988773	53
0	0.230572794743273	0.080981407312363	0.162267868708564	71
0	0.116279420894864	0.0694797280378486	0.0206593827953955	59
1	0.468030203259273	0.228816783669311	0.803647648268	84
1	1.07112999528473	0.223202692518298	0.928642419034313	84
1	0.485740930144903	0.19122656963669	0.156086521067163	76
0	-0.034890468243117	0.017243850060653	0.00945164468678289	50
1	0.320310825130156	0.14468970227604	0.438259224772475	75
0	0.14156037289333	0.048729918394178	0.111649693961906	52
0	0.389445277087473	0.16837537976652	0.00792442324436489	91
0	-0.0107646534255054	0.0256924076396939	0.0139962611023713	46
0	-0.0989688667368324	0.0113014554385382	0.00880649799797704	30
0	0.122725359832294	0.0673823235073516	0.00415192794366145	87
0	0.23605870703994	0.149287181884987	0.0019422676959981	93
0	0.268932435518381	0.0969298497919549	0.00165344427149649	93
0	0.268506423354158	0.145123169851255	0.00553408316520478	90
0	0.268906789717783	0.120374034017365	0.0215182652309566	83
0	0.489320706880287	0.19203247405057	0.387706333622683	87
0	0.283938602255867	0.212423138633804	0.00356510635222938	92
0	0.275365404932615	0.0988098640297109	0.141859474567015	77
0	0.175958982072206	0.106960396021225	0.00630902627424593	85
0	0.161800172546567	0.0999011262179443	0.00143677002937333	81
0	0.283696497991375	0.188186470638001	0.0144195630105659	95
0	0.269350825097623	0.220373507537022	0.00792079838305922	89
0	0.339856070429169	0.2997087409356	0.00879149689242519	100
0	0.209592741227732	0.105505933095012	0.0196746894403898	70
0	0.341684874127626	0.2449941655362	0.0266968125436353	92
0	0.311663934832196	0.204974097096741	0.0249126474178178	87
0	0.33568068626854	0.236585570158178	0.0263303078286233	91
0	0.225059350636964	0.0953661981690498	0.0389394763915439	79
0	0.0848951671700722	0.042649155241833	0.0142086341556454	62
0	0.365151145915417	0.237812279287836	0.336477626244902	87
0	0.234846665384095	0.176929815468333	0.0320583254836053	72
0	0.186667852525412	0.0977859013351126	0.12953799030773	46
1	0.202260166091569	0.090887195242653	0.0848323034096799	70
0	0.49742389650648	0.243280082508028	0.779442774126155	68
0	0.122936124065141	0.0776707512168275	0.0293983976484935	48
0	0.0722190602113448	0.0512360348859567	0.0128306734151739	54
0	0.255236924454167	0.104828563172951	0.0139057170609243	73
1	0.847665927197905	0.480063860466768	0.899754347776691	72
0	0.308669028589374	0.181578419539759	0.0534114733717392	71
1	0.332170796965823	0.142892307716797	0.0896083881123004	85
0	0.160915529672112	0.0965602162751393	0.0577325551945103	48
0	-0.144169368236284	0.0105763163205242	0.00271403007424021	19
0	0.180283819701711	0.147615709935182	0.0101890342097099	84
0	0.0630532438932403	0.05061835493194	0.0340078634958395	37
0	0.479338293886752	0.266019481061836	0.421413668156192	74
0	0.105843139471193	0.0860448847757652	0.00647979891525416	55
0	0.206649691066554	0.0872905903530602	0.0836429515641426	39
0	0.102407715402878	0.0848857264916543	0.0934183828895561	55
0	0.28087933784289	0.174080381937489	0.0245892833872163	73
1	0.559792184866362	0.409080022686568	0.505544293559623	81
0	0.647615909233805	0.375712549696342	0.956418263916457	74
0	0.0960383213997406	0.0356563729849688	0.00878364015980067	50
1	0.301919919929847	0.190309634792584	0.1360229011645	83
0	0.230897857260056	0.222419041576012	0.0277912857142759	78
0	0.248869375164209	0.23552567849331	0.0237981642931594	67
0	0.387349662811929	0.13752687881359	0.543957989033705	54
0	0.242699868730258	0.189848431777947	0.0168738738968649	85
1	0.267990081694716	0.0840514870507471	0.3558636176055	48
0	0.334986556944633	0.238129289446479	0.000734976342334205	85
0	0.315381185389759	0.248584793678741	0.0288944162190844	87
0	0.298481174573118	0.200478843108199	0.00622703899190495	77
0	0.957044730422374	0.30911195420097	0.707533789852725	77
0	0.312216477622239	0.204673823883024	0.0988248166685824	87
0	-0.0180021958096899	0.0199009991522114	0.00835280555065259	41
0	0.0840647839534058	0.0546034315626806	0.0201732971267297	52
0	0.318124343297295	0.183719586595107	0.0859581414750246	81
0	0.274923129728894	0.154727480067768	0.00687797737513276	92
0	0.079349997236372	0.0427419811466148	0.121851254615772	31
0	0.0625723669036064	0.0418098037272478	0.00680609814925748	58
1	0.776441107607433	0.272547800123526	0.64936887084867	51
1	0.53198697038966	0.185922704821822	0.917414871191395	91
0	0.390131187170448	0.290683650307002	0.25788261766922	94
0	0.268535262243157	0.2243452810756	0.0364112745876806	90
0	-0.0171676867866812	0.0347459891655213	0.000273833640373373	56
0	0.306980613907177	0.149640702447937	0.121535198827715	71
0	0.312557890199522	0.097346583713143	0.109336450445385	49
0	0.272170400074232	0.217733142309061	0.0166205869313435	71
0	-0.0989133982609095	0.0119664890991983	0.0146927417463384	25
0	0.163209335639471	0.0719683128092714	0.190100094996205	66
1	0.602459067844788	0.173538655370624	0.768279213025482	90
0	0.211693874734383	0.114368072054698	0.0401983801627769	77
0	0.0796867956458623	0.0288761250265951	0.0416361025353634	69
0	0.108933247420999	0.0481068196732076	0.138403954930805	57
0	0.210618257306903	0.154488359138543	0.0133645635010327	88
0	0.523622915440664	0.159413720905984	0.107209619958188	83
0	0.294001020025078	0.0919306679172072	0.225058021684007	83
0	0.372972930296658	0.273323826384307	0.0781467255042355	93
0	0.293651371254937	0.183398313388922	0.0238984865871057	84
0	0.397956705739572	0.265449511475045	0.0264860020834739	86
0	0.42635003598798	0.299539625825126	0.0819583222221136	98
0	0.343801646085306	0.115234701761428	0.0159999095991881	90
1	0.333390702654068	0.309554972446228	0.188126502169585	88
1	0.383714189141228	0.309279238527765	0.0294048031054058	99
1	0.485908950887318	0.185918585052232	0.104413055797213	85
1	0.307475966100106	0.216603421905416	0.0893942303176807	92
1	0.389374280111797	0.264168539200534	0.0439846644333754	88
1	0.326397024949915	0.255324400053315	0.023809271627227	87
1	0.559656278793221	0.400654506140166	0.187848435728881	94
1	0.293651371254937	0.183398313388922	0.0518453950552709	84
0	0.0463647324419673	0.0404052591399483	0.000312107413261588	78
0	0.138129898387244	0	0.00386937687533075	66
0	0.30545778777228	0.113262430926026	0.00646855585884776	98
0	0.190927604688429	0.0782345826619005	0.0137152613198247	85
0	0.172977277521044	0.0822644786716193	0.00852797398610055	82
0	0.323672310550368	0.220373507537022	0.0256119284641678	89
0	0.257123657222997	0.148550358712967	0.0173381662465804	91
0	0.16756342621413	0.0787472493652253	0.0178463026845689	63
0	0.303026354456053	0.190387991450471	0.0145593437571368	85
0	0.116228410314181	0.0699899868697161	0.00292350306602306	79
0	0.191009329934283	0.0806231385024811	0.00468264312677856	80
0	0.137542486918699	0.0635963186692616	0.0166435084036207	58
1	0.531441157374181	0.176346408870152	0.795259814306776	95
0	0.221601116945905	0.114508775916956	0.044080699742727	72
0	0.353693249845798	0.262407845338823	0.0274447643321194	94
0	0.201230501051642	0.092800308921832	0.00874410538295107	89
0	0.262541516204356	0.148417666218822	0.00510173952243117	90
0	0.299655559114023	0.190387991450471	0.0242319839944137	85
0	0.350868759188755	0.309291163529742	0.0167070563945254	93
0	0.207014773164981	0.159697918107405	0.0100109546758111	84
0	0.223789461405779	0	0.019890249542327	89
0	0.191580177650474	0.0931732224004545	0.0411839171585306	67
0	0.309196627106631	0.211348870846149	0.0180317494005666	97
0	0.317668122691282	0.212572017170331	0.0252599309457992	88
0	0.405193641202213	0.247833232651547	0.0232832626716262	91
0	0.196530923311775	0.12010831828952	0.0927981795675775	81
0	0.305659746973109	0.197579606036151	0.0245700181293493	86
0	0.299655559114023	0.190387991450471	0.0242319839944137	85
0	0.287647183395851	0.176609268824099	0.023569468136732	83
0	0.161913503623471	0.169131423950109	0.022450019982022	79
0	0.190947016586368	0.117538601111593	0.00547295873280165	79
0	0.33568068626854	0.236585570158178	0.0263303078286233	91
0	0.329676498409454	0.228378275089635	0.0259687003934652	90
1	0.265436678557827	0.125931006005926	0.0113352280274128	80
0	0.347689061986712	0.25360233696525	0.0270682769961686	93
0	0.091433583241792	0.0813966879057235	0.00274873510053856	69
0	0.33568068626854	0.236585570158178	0.0263303078286233	91
0	0.164965049088185	0.0333154753379195	0.0656373548093266	60
1	0.151494366758231	0.104233448329821	0.0439868931379676	65
1	0.383474216689126	0.207787070150264	0.232251759010259	91
0	0.101941531363466	0.0477870189149783	0.00396850307244215	71
0	0.153232806290093	0.068082855906257	0.108951122683471	62
0	0.372196761431853	0.0361857213318318	0.991694112323252	29
1	0.533192570133271	0.235849553880007	0.384325199849609	87
1	0.25068177288512	0.173324242060714	0.0224813802742567	80
0	-0.0328133308662856	0.020571109343533	0.00658967401358458	45
0	0.334562720168825	0.208543657776985	0.23199152690046	77
0	0.161718856418992	0.0707282982574972	0.0710177413915951	69
0	0.207267790035601	0.108240138168461	0.0363897447242799	75
0	0.1905277298391	0.0769786156425182	0.162285541295431	68
0	-0.14764772676927	0.00914576313847331	0.00258518437533337	33
0	0.116046686042155	0.0812527110101262	0.0117268282815809	71
0	0.279167336677302	0.0663514131889054	0.0650857103935366	64
0	0.017211563041829	0.0294744146335388	0.00205884345688259	62
0	0.041354160357892	0.0359247547178061	0.00616005836555431	57
0	-0.100901674414843	0.0154314143648028	0.00135282043731657	38
1	0.927378301867987	0.257109962235196	0.841860952356772	87
0	0.0260055038655762	0.0372596918417768	0.00180058777173756	59
1	0.49533279962267	0.269227399009732	0.494832725596793	70
0	0.0301723440433022	0.0320765348313558	0.0518086149932486	46
1	0.212778014304555	0.124213523135401	0.219886157104655	62
1	0.253396251649261	0.174836946735654	0.0915961409691605	81
0	0.112974002650585	0	0.00246648935556885	73
0	0.0635877940251256	0.0515859321131996	0.0203218006406494	50
0	-0.0783061311337426	0.0135703237202105	0.0057447365970172	44
1	0.0635574803145777	0.0519358907626884	0.0413323124690165	52
1	0.372226326404261	0.266803012590416	0.351243003652539	89
0	0.158194905096253	0.080876580622194	0.194216760261549	58
0	0.094876956565151	0.0431650500902108	0.0402891502220152	69
1	0.362176769359235	0.116193725808289	0.51646406648485	63
0	0.221247343728996	0.0909827057395751	0.130733379071707	67
0	0.401569022119314	0.14000487161669	0.847259948158292	59
0	0.037857830989328	0.0284331364812491	0.00596466467111698	51
1	0.225996380574517	0.158054385515162	0.0392995374897053	88
1	0.47917806879984	0.308458374421761	0.779736259222885	77
0	0.298642316862065	0.178220482363057	0.308365916403631	86
0	0.348030272637078	0.236940512894937	0.0565312363225446	90
0	0.164017436701142	0.070246393451362	0.155683816437376	49
1	0.342192470029189	0.141924206706751	0.15901439193564	83
0	0.167093167257842	0.110879931367271	0.0207526581343598	75
0	0.147624614079484	0.103869408099121	0.0728036059457643	74
1	0.501347463651821	0.34307483656145	0.320782099129367	89
1	0.708775366912098	0.314500104332262	0.922412069002047	95
1	0.341363087634625	0.169444948791163	0.656214563713412	81
0	-0.0107444051157856	0.0224252027760539	0.0250132080520231	47
1	0.0542797553223655	0.0478000893464654	0.051661929472266	54
0	0.153320969059683	0.0594797270016954	0.021390204252405	69
0	0.135887345661243	0.103829649679634	0.00649065565268721	76
1	0.0971192982695618	0.0741176297358408	0.0261456247681797	54
0	-0.00894010384693027	0.0271637221730651	0.0292508370280683	42
1	0.285729184113763	0.200502798227427	0.257145157787032	85
1	0.457886572326746	0.362740358363233	0.169649984599173	94
0	0.0464940714415471	0.0443752972574689	0.0445193784756732	49
0	0.187449194292783	0.148775457150341	0.0329646295728373	84
0	0.0495531753701834	0.0414238762145539	0.0115794084876312	57
0	0.0884208698221303	0.0459487907102188	0.0146330719756008	59
1	0.324090454063568	0.121877581629298	0.157986040297223	78
0	0.135812675140244	0.0518038783445169	0.231395188482257	65
0	0.211513677123087	0.0969522925785205	0.0276174919182354	74
0	0.205353707196742	0.0837232768102854	0.00853109453836851	76
0	0.0559047428913047	0.0295035603950129	0.0134443627129712	52
1	0.808089317181331	0.394507984923286	0.200744159962931	90
0	0.2694662788794	0.153503390816429	0.0258511276182965	86
1	0.160252421288639	0.16459892285254	0.0920907506701982	74
0	0.164292930290762	0.0602692388769469	0.0332450258994458	66
0	-0.0883806869029471	0.0113941586439065	0.0087158335829471	31
1	1.51271246526502	0.318068682852203	0.835407936662774	91
0	0.177942139272773	0.042573447385014	0.0305359144238795	55
0	0.152855299553318	0.0735788511559726	0.0652245799647137	60
1	0.588572022632388	0.264004096790454	0.870297312892495	89
0	0.194105469924416	0.0416097615215862	0.0229284829197635	55
0	0.0414394299232251	0.0340487216374341	0.000796775969973393	61
0	0.0917716117536222	0.0351697495645683	0.0565888662106564	50
0	0.0667348129640538	0.0467840985905376	0.00820233838755773	58
0	0.0879604721043696	0.0561707778491468	0.0119473095408058	63
0	0.0721164542031237	0.0535339505966492	0.0230396388876351	64
0	0.106998440096467	0.0562963194868209	0.0399364578974129	59
0	0.300888818519797	0.207950871062215	0.0366953413792383	79
1	0.261004759458379	0.188410996420322	0.0677081143965247	73
0	0.133422120080407	0.0491855589726108	0.0824201306023427	51
0	0.227380505794684	0.0865190286051173	0.0541618890769331	88
0	0.364693233931368	0.166208753863749	0.272592285930835	66
1	0.311749114076909	0.0814972904437751	0.131329111552648	79
1	0.128760267603298	0.0291978330593521	0.112987696913233	66
1	0.440298464150949	0.137220646801811	0.598160674462973	65
1	0.310343450366613	0.176609268824099	0.114866597490681	83
0	0.247946250134119	0.138443655824207	0.0315143118975829	85
1	0.329093513070298	0.119611633953026	0.134147476350037	96
1	0.551935668661044	0.281341672272685	0.777084632182192	83
0	0.537947469008259	0.137110295108827	0.173228785183746	95
1	0.211662566013725	0.149817169574504	0.0280676123245531	84
1	0.25863435705027	0.151242804611145	0.00969681235821874	97
1	0.278828876533646	0.125777742409501	0.234242102142816	89
1	0.352971099148059	0.25391057729421	0.10957038644826	82
1	0.247114515123214	0.075556623019685	0.328376117621629	70
1	0.427797538045225	0.25879861086286	0.134308079495298	89
0	0.38417357861675	0.224240682247676	0.0385585859573602	87
1	0.33491105456443	0.223961566329707	0.330955219479054	89
1	0.276694922681286	0.163481104781419	0.205811369160572	77
1	0.324596243122657	0.133532285460224	0.303521406811583	76
0	0.407317625780593	0.23274863833943	0.0599775226933649	94
1	0.309064487661287	0.181685139658294	0.038072643947149	89
1	0.347024112461281	0.178622120038403	0.157185676597958	84
0	0.226097466565866	0.143314787504022	0.00013170895785812	87
1	0.296043624734027	0.171415473705884	0.040497804785592	85
1	0.640146363054105	0.352043579012865	0.421852857561099	86
0	0.299917251767369	0.18068510780051	0.0479022643740653	92
0	0.453435197567505	0.290562185739402	0.102901179653516	89
1	0.319132420952463	0.281970040710955	0.0154309178389586	80
1	0.30215839194605	0.163988797618047	0.161724716558508	84
0	0.209496149986043	0.124740544483987	0.0280192311820738	82
0	0.30608165938435	0.0984511961976505	0.758755579472894	58
0	0.338584182745702	0.187938548698496	0.23037678198068	97
1	0.104518637851576	0.0478862128515301	0.264741761440097	56
0	0.489083374972905	0.279995363079016	0.620970392893258	57
1	0.352544803704286	0.268562273216221	0.134277258966219	78
1	0.430908640942839	0.224181895451479	0.0150720580058535	90
1	0.229775518981719	0.134622290171134	0.0152227130815519	75
1	0.322932512727948	0.173492532800785	0.123760748587248	83
1	0.362148567235117	0.232615637916693	0.279513953684074	84
1	0.275601616618226	0.117617709500571	0.30102221033963	78
0	0.566329890601039	0.171957807608115	0.803667674718913	74
0	0.482174441899569	0.151225034360999	0.950197002752401	85
0	-0.0285453216893271	0.020694422245922	0.022884368560207	36
1	0.274408976055176	0.0888269462376232	0.167874874042722	72
0	0.356234087697071	0.167239322963345	0.0647043096428161	89
1	0.176032649189871	0.101211333048804	0.0244201377129268	74
0	0.247805537514479	0.0999175153067533	0.0649994789106038	79
0	0.280860872617296	0.138922625813567	0.246553175809324	74
0	0.138163951325118	0.143045302197642	0.026349043173281	85
1	0.343542831442055	0.20210844304113	0.0655279506414736	94
0	0.341684874127626	0.2449941655362	0.0266968125436353	92
0	0.311663934832196	0.204974097096741	0.0249126474178178	87
0	0.203626427347196	0.0874745074545041	0.00392308588964321	86
0	0.22760530480499	0.11925636562298	0.0205133752714682	73
0	0.353693249845798	0.262407845338823	0.0274447643321194	94
1	0.22760530480499	0.11925636562298	0.0205133752714682	73
0	0.0753208029523505	0.0385837934255801	0.0781007044697713	45
0	0.318620355150865	0.126692167056515	0.522453658670654	66
0	0.227867737846688	0.121867753720621	0.0188694944375802	75
0	0.278678018064375	0.157013682337856	0.0738925046236434	79
1	0.156232090722902	0.0439262925251042	0.0263943124625133	55
0	0.137377796403184	0.0578517875868144	0.0526769634578185	65
0	0.261324063133164	0.115460162296276	0.0547542519973402	77
0	0.154685686441257	0.0812779235186572	0.0662742755686643	66
0	0.243290854759654	0.139709099804907	0.0253887647046308	78
0	0.107037251789951	0.0509360600014139	0.0190547932999799	56
1	0.385345947285463	0.127395649307784	0.0303030298931074	87
0	0.192208253678574	0.0724777154551839	0.119903004864681	69
0	0.305863620712577	0.107832772700102	0.636973931063679	71
0	0.245143099421122	0.0923550272626038	0.250686196217323	72
0	0.0107599412158038	0.0313081163876993	0.0135860720630515	44
0	0.300458810255353	0.121019210352602	0.133007256897415	69
0	0.0920617334499872	0.0320858448781601	0.00823158603207966	63
0	0.0163590462842178	0.025145940274844	0.0233537029668455	56
0	-0.0662211319312271	0.0129131634930129	0.00805584482958521	48
0	-0.122853564601494	0	0.00181085817450023	40
0	0.205725354220908	0.0767553398869158	0.189385356459717	45
0	0.162657922830728	0.075624058038631	0.0267345293889521	70
0	0.191554109216088	0.077641623908493	0.0147034874492454	69
0	0.439066497614573	0.0846618745274733	0.49011355953824	61
0	0.136710911866718	0.0556188538228035	0.0661393767737951	53
0	0.235657003771825	0.101599381742342	0.0915030687532829	78
0	0.268082181760214	0.0784681376542269	0.225042674247393	58
0	0.0342540710113244	0	0.00677897092670175	54
0	0.0981300166412091	0.0594266143902273	0.0215776384729617	59
1	0.401664945477416	0.226964983891455	0.469801570470045	86
0	0.180755435545622	0.0862815937471412	0.0894228882808828	76
0	0.136607276610225	0.0828369644376816	0.00907627227942212	75
0	0.334157713142788	0.0746461661928659	0.311503016108988	72
0	0.270100461131085	0.0919494724014819	0.235841381488531	63
0	0.199655539835716	0.0350659947339749	0.0414522221680431	52
1	0.394513653640321	0.156376355934181	0.299047280005243	68
0	0.514609589263286	0.16064136358139	0.843613397415184	78
1	0.347631804459539	0.243606180149415	0.46649206919654	79
0	0.255074683406561	0.118111758785747	0.0753925422305648	73
0	0.31989017433531	0.171260025970063	0.0722959998014124	81
0	0.139540322504489	0.0606454890084099	0.0303291050336681	66
1	0.285134357036297	0.112787702268079	0.26360459021171	68
0	-0.0569881267141183	0.0137011181218903	0.0832180031797548	37
0	-0.0373103090794712	0.0225564468804824	0.0213140376537111	38
0	0.10303012222181	0.0636206342751535	0.014035106974534	61
0	0.223361189101017	0.0711977554126601	0.349693003551765	59
0	0.117953230180888	0.0370492833417887	0.0617366495353443	47
0	0.203389616295294	0.0963401478666161	0.100897044305731	57
0	0.130611567315755	0.0654918831519798	0.0116480748464188	63
0	0.25540418353485	0.137153407953818	0.0595853634363281	78
0	0.23470327846655	0.117023933039505	0.0203406230110331	76
0	0.0562530825184455	0.0329780148059411	0.0135887928343106	57
1	0.270784653857353	0.129338609514561	0.0657825933035367	93
1	0.298516916729833	0.148670843918096	0.293670196162665	77
0	0.0279139505461773	0.0288191719736438	0.0385603623578327	40
0	0.315980510725594	0.129410551122404	0.528769209149301	71
0	0.088344319918857	0.04296348075144	0.0235920903585696	49
0	0.192723436859221	0.05023930351955	0.061110108485212	69
0	0.375060880954842	0.361038460124263	0.0165435848452903	88
1	0.550761341673222	0.169653305527496	0.176952013992907	85
1	0.867054492526488	0.29145380577321	0.940999156317675	85
0	-0.0597520847853062	0.0172333640721371	0.00235232280670561	42
1	0.387144723900634	0.299954403977084	0.0403877445238647	84
0	0.0572692439232821	0.0218543032253604	0.00579112978120065	48
0	0.294321928649958	0.197467890671422	0.0492928555887114	88
1	0.424784715831546	0.150335956935351	0.147198735941696	84
1	0.381807418537736	0.311562217544509	0.0493931454346054	79
0	0.325170665784264	0.334582368966929	0.0151552961380902	84
1	0.531496091678926	0.337403334327011	0.300968769449676	94
0	0.465135227355156	0.425917426801003	0.0579995272517996	96
1	0.458227474964756	0.374457265873513	0.0893756721935037	89
1	0.867054492526488	0.29145380577321	0.940999156317675	85
0	0.458234067571129	0.284179356366134	0.404860845765889	88
0	0.331229179226766	0.2550423706709	0.0224334786423853	84
1	0.348514256072429	0.11966549349885	0.148056416202501	82
0	0.497393144207463	0.351950362370097	0.173435287088487	89
0	0.364528826650547	0.113185138988861	0.539389977589141	70
1	0.670892583672685	0.248500750110206	0.595758320469913	95
0	-0.0790014479596962	0.00967785440095028	0.00620348083715998	37
0	0.240969698359659	0.0562533252884044	0.0474041065363293	71
0	0.357868793062027	0.229195440749264	0.187211211014826	95
0	0.192307415093848	0.12851256252183	0.0606308372845879	68
0	0.45723689879146	0.212385519503434	0.0633028351186393	88
0	0.379207710778509	0.260978939595161	0.0644952939708549	80
0	0.453388582908839	0.11293947362473	0.0783722311694459	83
0	0.611658740405436	0.2593609630333	0.876695960875807	76
0	0.138440881989059	0.0583567808037172	0.0105971139901686	68
0	0.167760457925244	0.110853905456992	0.0865675876345905	72
0	0.382704047805839	0.231729070968404	0.451696142092213	76
0	0.134402327592663	0.0987566762369398	0.00430304980239174	84
0	0.279598225363838	0.166384884204804	0.0481408530418231	92
0	0.0110409660137615	0.030882291770808	0.0149453645814158	62
0	0.310520561681907	0.148857121535218	0.222488171897381	77
1	0.38415393490206	0.247054681231197	0.120284878531829	89
1	0.281031054333156	0.150077042837176	0.0594620828913564	79
1	0.236134336880034	0.124113210596522	0.0673558530466623	71
1	0.391228097737618	0.121222291686557	0.863417094243808	69
1	0.364547583606971	0.182924055082031	0.237608667612517	82
1	0.219984677590757	0.0881336092687876	0.117454749222747	73
1	0.449608419265153	0.209444761911622	0.34094095164441	84
1	0.535843279187933	0.223918860139412	0.847755060612796	84
1	0.634325279188243	0.153194245082039	0.960028265732951	75
1	0.428002383069302	0.125845085444061	0.895961383122321	69
1	0.526206970847064	0.230007084860511	0.676780225779952	87
1	0.316840849913491	0.127481447304401	0.0644828709638022	74
0	0.222031062077813	0.141248031466906	0.0424999889465417	72
0	0.00442357109179961	0.0485283678014343	0.0196195937736336	42
0	0.245093745025289	0.151999340077126	0.165252190998568	69
0	0.262957200279225	0.152287819232317	0.201793906203938	64
0	0.0929426823813896	0.0644318940713562	0.00400440465279335	60
0	0.259847337232838	0.152978314597137	0.164875948207125	79
0	0.135858835496352	0.0312084214994335	0.15443824249898	70
1	0.306149399187706	0.150373298800822	0.096626512368271	75
0	0.203352678438472	0.128847765413084	0.0154761203847675	74
0	0.210110351318336	0.14381136805666	0.0576456318718396	56
0	0.232111301823585	0.107972274247048	0.0659017938374	55
0	0.227071271428445	0.128497170641544	0.0463917229807188	69
0	0.117038167488967	0.0748386028817486	0.0202691489801585	62
0	-0.0965498842819182	0.0109749748269406	0.000723513977650461	51
0	0.0432354548471164	0.0453296992084889	0.00776907377484458	36
0	0.274200062126399	0.193035327256554	0.142282665548558	69
0	-0.0102712061655899	0.0326682776596855	0.0067541779676242	26
1	0.223570069004284	0.121883312328608	0.0492062779471185	75
1	0.285368348306238	0.101844397366941	0.0931376008332466	89
0	0.23177862475054	0.17057362396586	0.0533825106557949	74
0	0.216907050402742	0.0694660419954735	0.0177644842210546	85
0	0.30071692163546	0.226626295679485	0.14709746104789	77
1	0.941540625100115	0.720167908839831	0.597379982864521	92
0	0.132983886156178	0.0557939546954522	0.0763574235907367	64
0	-0.113885477110359	0.00696496349310631	0.00353746942974083	34
0	0.13343863025985	0.0606669133467851	0.0265075643071771	50
0	0.12952848460416	0.0474360529851279	0.00877747810972279	72
0	0.135977823331513	0.034765342281995	0.0468978650546176	64
0	-0.0518886836475921	0.029027189538005	0.0137298241548613	43
0	0.256648175123958	0.115690589921557	0.0816692611800466	90
0	0.039672181421449	0.0377685687451871	0.0178323128086617	47
1	0.408507404169303	0.302950409719091	0.149900722244651	85
0	-0.0777573509377094	0.0107128498702713	0.00256328282008849	55
0	0.0834058026436458	0.0494383235378794	0.00998624770985643	64
0	-0.0752454389236279	0.00810187618167625	0.00142882084421518	45
1	0.34453620899811	0.188418272062084	0.0244726069225231	83
0	0.185658997163813	0.0851632366001415	0.0616079493081442	64
0	0.287727562814818	0.22190883372787	0.0142911872699508	81
1	0.527147848635789	0.188087473887213	0.960131360948054	79
1	0.402332691660977	0.128500256618204	0.238207723713529	86
1	0.50465818987286	0.170708024431291	0.399610369256937	77
1	0.183323005485118	0.147610274102325	0.0145512830361402	83
1	0.782103603166024	0.230507709932817	0.737192310648889	87
0	-0.0194326079050118	0.0192116863392445	0.0149261792302255	43
0	-0.155207643514648	0.00755288709388525	0.0037761014437365	27
1	0.535679421366325	0.368623970967659	0.0465877467532217	87
1	0.225962366561295	0.155659219364262	0.0346604741077865	76
0	0.132608102495117	0.0486364792876182	0.135747325461895	52
0	0.0120121373641254	0.036927236730399	0.000558202769510286	51
0	-0.0169741279819243	0.0143327394803095	0.0346160010017129	55
0	-0.0297872270809438	0.0226464988898393	0.00766367908125515	40
0	0.00686544990140889	0.0311772443185669	0.0287256110384308	56
1	0.394123337748654	0.198251129763013	0.275654560260093	76
1	0.293806990370657	0.0603158613659397	0.809244730036365	53
0	0.172613519960805	0.0607597651393642	0.32268716828972	47
0	0.265411706924651	0.0664212043912469	0.558646335058024	57
0	0.10073677506638	0.0393370463169616	0.0173856782504011	56
0	0.0233074421794044	0.0287780794866308	0.00453660274494493	56
0	-0.0508207643074499	0.0236486569370722	0.000474269752992512	42
1	0.457540003855808	0.287980145166633	0.396045462584771	93
0	0.0852784744551272	0.0487865765106052	0.0362403109545433	55
0	0.216306121391201	0.13060301068599	0.0876869648344201	70
0	0.246262677448879	0.104685985684118	0.141180456539583	84
0	0.280401170162393	0.0945426651982548	0.124047216637611	84
0	0.81901028615888	0.222338824220219	0.999895169425354	83
0	0.00903844564361756	0.019664537902323	0.0396377002577398	43
0	0.017185199839329	0.0446172311243793	0.000733433504661748	56
0	-0.0156673301811822	0.030982783394193	0.00274386558976757	44
1	0.482281136895256	0.153380549812518	0.792775951855115	91
0	0.338428782916253	0.134985590381266	0.254504625916815	74
0	0.0107548769630813	0.0262654590413632	0.0135355208110221	49
0	0.154118729429925	0.0985274931495129	0.0117116559927091	74
0	0.0468888315306367	0.0508968687627849	0.0158752727792373	62
0	0.170290210349027	0.0704743052652671	0.0328491085420719	57
0	0.0161413807631448	0.0211270770761007	0.000966985197984435	59
0	0.262200388573244	0.153072416979663	0.0271331786064156	84
0	0.165229492283705	0.1120196819221	0.0108499033212554	73
0	0.222082744166707	0.109391081354681	0.00945529668674361	92
1	0.374914941221536	0.161651593268731	0.128834883689711	85
0	0.166207669544041	0.0304230527766546	0.0838270110148267	55
0	0.140220145741723	0.0597580758362417	0.0199530216077207	67
0	-0.0654573978361704	0.0127129951239504	0.0246843934761839	45
0	0.312455628753199	0.0651347470140318	0.22286811005143	64
0	0.0487239801463222	0.0336562611565934	0.00663901896904233	62
0	0.16500485403776	0.0881774530858002	0.0288724513762539	70
0	0.36149228082188	0.0787991344873078	0.0121436627101923	82
0	-0.0262990267705334	0.0244837940296499	0.0240903205722023	48
0	0.00516998297736548	0.0383752189822362	0.00157720912410175	57
0	0.285094508354069	0.116185865891239	0.031438463698605	75
1	0.413511524168154	0.193666720011032	0.421394873509159	82
0	0.309176959667215	0.0701323881145942	0.605364969342241	69
1	0.43286388658434	0.241767977927097	0.110600703870481	91
0	0.198512519682476	0.129196083882878	0.069758177877525	80
0	-0.0273330525765395	0.022467815746564	0.00797030787795692	59
0	0.0663325386310467	0.0336097522706569	0.0101754483084817	59
1	0.536503249385678	0.307393900736684	0.678003130829911	95
0	0.0581901179618049	0.0404882406114322	0.00886341766161189	71
0	0.297713730987471	0.135018753132143	0.0637657251149125	70
1	0.225178374667553	0.154518488144544	0.0346604741077865	76
0	0.124568375201242	0.0459256134150231	0.00844600449007852	68
0	0.0867898045666694	0.0694816138087199	0.00781154019234951	68
1	0.562613903123428	0.358962895454905	0.215878567694995	77
0	0.705179113957661	0.393301831379853	0.140752628271565	75
0	0.0580315464607436	0.0478595152145548	0.0251875831947241	60
0	0.116024896029061	0.0868210350443351	0.0480912964526114	49
0	0.139995183983457	0.0889743552286886	0.0159946677212208	71
0	0.363752797866809	0.26193818595667	0.0136938102871208	101
0	0.165237204205197	0.131190438230495	0.0414790508774655	72
0	0.146208624218951	0.0808498516057735	0.025897378370308	71
0	0.242454800237463	0.143679354237512	0.0221371351840807	75
0	0.275180516567938	0.15242725534701	0.230539054540929	64
0	0.0392444689329199	0	3.97911193342959e-06	52
1	0.528741655413408	0.438817865642452	0.107974665156148	82
0	0.177585970069441	0.0753304025123714	0.0160195225861031	74
0	0.0368957839951163	0.0344267795210261	0.028759278112337	52
0	0.17983494468412	0.140051003502683	0.090811879558924	70
0	0.20974090200946	0.141881686061282	0.0413385371767143	74
1	0.302732315792099	0.147858836551336	0.484906358125866	72
0	0.28772599264913	0.228231638146762	0.186388781689822	70
0	-0.0844696910573469	0.0216235740497834	0.00350376240515059	25
0	0.104812414059871	0.0430664382143984	0.143966002174309	45
0	0.0806527992744611	0.0608491798668325	0.0172378442953901	55
1	0.689439482449201	0.41778903454449	0.882648576766801	80
0	0.368609544493769	0.309108227343659	0.2468651765045	86
0	0.0592373218848932	0.0569228480155763	0.031142535595443	57
0	0.228006284247552	0.172121926151693	0.0107046467755407	67
0	0.272372945808203	0.168898078362907	0.0642825159683116	58
0	0.249200801369549	0.195445579786825	0.0491843832831985	64
0	0.796196477338778	0.447910889670484	0.98990533415686	80
0	0.525568437873026	0.42970496393237	0.374026844328187	78
0	0.230197375773817	0.17008463067839	0.0141602800946024	75
0	-0.0802694675723438	0.0221684640537457	0.0165755529767686	36
0	0.382833602579191	0.0689141185109875	0.0390944602901012	58
0	0.294888562715503	0.214738067853582	0.0311437123514051	64
0	-0.00991574722935637	0.0291597791028022	0.0211773156071363	38
0	0.317949846841404	0.119287017052318	0.42318896387474	47
0	0.177415812352618	0.101275399165981	0.0636159238095982	68
0	0.234635309651628	0.131769250598301	0.102417548257887	74
0	0.15875025011513	0.10474365501775	0.042272241604404	68
0	0.280417909347631	0.161935624503365	0.245966042301515	70
0	0.348780153107538	0.222707085959047	0.0608806081167829	68
0	0.254774580755112	0.136974046257759	0.0357112190424429	55
1	0.620102263262862	0.350170345590274	0.947317459691162	82
1	0.302715185395891	0.179090742618216	0.129290125043338	62
0	-0.0016731255578617	0.0256283240077809	0.0043334003993217	45
0	0.0780163885166662	0.0304750951768035	0.00514236315516001	74
0	0.229024315984159	0.135705964542489	0.00154258038800862	92
0	0.315249969997967	0.182978726925214	0.0661162186819804	101
0	0.245867493783024	0.104513582869275	0.0354967548690473	87
0	0.255589875702017	0.11450556732462	0.00745355345308978	89
0	0.156307949015836	0.125124565515654	0.00471466351917151	95
0	-0.253393225626523	0.00276988807552486	0.00421902228321252	17
0	0.223105228859188	0.130486774433937	0.0036471663686656	83
0	0.185884821236153	0.0330548535741035	0.00147466170676614	88
0	0.38121249637685	0.253995067073517	0.2355198400878	92
0	-0.210700408908292	0.00469060960186041	0.00737284505603276	0
0	0.257626244100421	0.145605629415887	0.0219895835087033	78
0	0.136273049735976	0.0444062709092395	0.00441378152732238	77
0	0.315192399702662	0.159739142400688	0.347851889143539	78
0	0.436749677701643	0.146208306174173	0.409290604851138	75
0	0.181667036954994	0.08527699959717	0.126437460962983	71
0	0.235674657189167	0.0829500107464974	0.0139512743331765	92
0	0.365003036860473	0.174257757274285	0.410741738941796	82
0	0.125949727158949	0.0658362317547769	0.0483970546176502	67
0	0.031047529491671	0.0136234499155896	0.0269516325839705	45
0	0.380885709195966	0.166966089394077	0.655907686630408	70
0	0.217141466766496	0.0671102282896879	0.277264796064951	62
0	0.137219397028394	0.0556120352054115	0.0228548933843488	38
0	-0.00385347219148182	0.0269267025225094	0.0124153339084502	46
1	0.336617475884236	0.159489606058444	0.102544202700743	86
1	0.564321645531282	0.319606903050113	0.910958929456507	68
1	0.992467092402238	0.674159240461061	0.491630885780826	87
0	0.13695965945626	0.0777670214700304	0.0664987024980135	63
0	0.0216407521096054	0.023864840366575	0.00999119218246647	59
0	0.282075358645817	0.127267165744767	0.0360966894386379	69
0	0.425932140843298	0.113776803028276	0.697927902435954	90
0	0.252502659265727	0.0996000597941482	0.0494255064161227	69
0	0.239760922873681	0.110416628292183	0.231029017226019	70
0	0.36675088310838	0.198097122054602	0.666600660275286	75
0	0.108695428437602	0.0653177760723135	0.00134985151679928	70
0	0.0345820772392724	0.0313330206941855	0.0362347230570553	39
0	0.182237031931442	0.0953686841914434	0.0550427300054385	81
0	0.166530116174907	0.062794693453302	0.0621097523126096	71
[truncated: 28,794 more rows]
