# Supplementary material for: Development and evaluation of a machine learning-based in-hospital COVID-19 disease outcome predictor (CODOP): A multicontinental retrospective study
Source: eLife. 2022 May 17;11:e75985. doi: 10.7554/eLife.75985 (PMC9129872; doi:10.7554/eLife.75985)
Supplement: Figure 3—figure supplement 1—source data 1. — al. for the risk stratification analysis in the Test 1, Test 2, and External Test 3 datasets. [file elife-75985-fig3-figsupp1-data1.xlsx]

## Sheet: Klen etal_Fig 3-figsup1_Sdata1
Test 1				Test 2				External test 3
outcome	Days at hospital	CODOP		outcome	Days at hospital	CODOP		outcome	Days at hospital	CODOP
0	0	0.765586400318513		1	0	0.449159915068783		1	0	0.449159915068783
1	0	0.620887194430167		0	0	0.183853364015807		0	0	0.183853364015807
0	0	0.0490983898157281		0	0	0.09566842935193		0	0	0.09566842935193
0	0	0.549297958389096		0	0	0.0976991933741894		0	0	0.0976991933741894
0	0	0.253984414442867		0	0	0.309094800687225		0	0	0.309094800687225
0	0	0.229681504814521		0	0	0.260234604757891		0	0	0.260234604757891
0	0	0.256781904477371		0	0	0.0985862123723614		0	0	0.0985862123723614
0	0	0.113276770391163		0	0	-0.0061570576960318		0	0	-0.0061570576960318
0	0	0.37559589347683		0	0	-0.0330393125998625		0	0	-0.0330393125998625
0	0	0.163151230075092		0	0	0.0665592230728792		0	0	0.0665592230728792
1	0	0.258752649228173		0	0	0.27236345276064		0	0	0.27236345276064
0	0	0.190993055125994		0	0	0.234251444258778		0	0	0.234251444258778
0	0	0.308915498989377		1	0	0.18278224846645		1	0	0.18278224846645
0	0	0.138136319703933		0	0	0.220106183069629		0	0	0.220106183069629
0	0	0.0232379043325456		0	0	0.129922133210099		0	0	0.129922133210099
0	0	0.182956744799413		0	0	0.144851597493336		0	0	0.144851597493336
0	0	0.00773595526579002		0	0	0.132522099156827		0	0	0.132522099156827
0	0	0.0933037686838108		0	0	0.0246248387682628		0	0	0.0246248387682628
0	0	0.141022062090241		0	0	0.374227904798904		0	0	0.374227904798904
0	0	0.254537051430265		0	0	0.175433894291051		0	0	0.175433894291051
1	0	0.429955489949702		0	0	0.141202871537664		0	0	0.141202871537664
0	0	0.519017701779454		0	0	0.249194720782734		0	0	0.249194720782734
0	0	0.333346376918856		1	0	0.321720129319327		1	0	0.321720129319327
0	0	0.126205240765095		0	0	0.364881184565828		0	0	0.364881184565828
0	0	0.252413189039071		0	0	0.15238056803504		0	0	0.15238056803504
0	0	0.314343684633015		0	0	0.246777182857556		0	0	0.246777182857556
0	0	0.351694047599234		0	0	0.251223345887174		0	0	0.251223345887174
0	0	0.155246531012635		0	0	-0.000533210918049039		0	0	-0.000533210918049039
0	0	0.194742174755722		0	0	0.239087664916732		0	0	0.239087664916732
1	0	0.455405702616538		0	0	0.121512941973881		0	0	0.121512941973881
1	0	0.183992586262712		0	0	0.139212892053007		0	0	0.139212892053007
0	0	0.227564876032452		0	0	0.24270025223205		0	0	0.24270025223205
1	0	0.455562087792271		0	0	0.179255211917408		0	0	0.179255211917408
1	0	0.29142156121395		0	0	0.240952373306452		0	0	0.240952373306452
0	0	0.219742582674646		0	0	0.0450317324231057		0	0	0.0450317324231057
0	0	0.1670511049006		0	0	0.032473725338437		0	0	0.032473725338437
0	0	0.431502996765838		0	0	0.104069273317955		0	0	0.104069273317955
0	0	0.466939967817172		0	0	0.102243398688446		0	0	0.102243398688446
1	0	0.30466596947467		0	0	-0.0307078382264002		0	0	-0.0307078382264002
1	0	0.260727330636811		0	0	0.448160324689708		0	0	0.448160324689708
0	0	0.236939878640725		0	0	0.327500764399109		0	0	0.327500764399109
0	0	0.294747291040197		0	0	-0.0404588401536655		0	0	-0.0404588401536655
0	0	0.370120173596442		0	0	0.160593222853785		0	0	0.160593222853785
0	0	0.31954324446531		0	0	0.149044884990781		0	0	0.149044884990781
0	0	0.253955594746688		0	0	0.379733359558845		0	0	0.379733359558845
0	0	0.262690625187124		0	0	0.0682652482347006		0	0	0.0682652482347006
0	0	0.327068375125943		0	0	0.153465365695733		0	0	0.153465365695733
0	0	0.429347604598223		0	0	0.370573370385519		0	0	0.370573370385519
0	0	0.263653377063636		0	0	0.228590748586998		0	0	0.228590748586998
0	0	0.359966514327937		0	0	0.660925487120442		0	0	0.660925487120442
0	0	0.198361622987172		0	0	0.265426831878634		0	0	0.265426831878634
0	0	0.299747434382047		0	0	0.282606503770504		0	0	0.282606503770504
0	0	0.18058981788979		0	0	0.277327584243405		0	0	0.277327584243405
0	0	0.315884441423207		1	0	0.51381837477133		1	0	0.51381837477133
0	0	0.227870140560342		1	0	0.647205527615857		1	0	0.647205527615857
1	0	0.319889787779155		0	0	0.157822928054943		0	0	0.157822928054943
0	0	0.299050253647635		0	0	0.28645796386615		0	0	0.28645796386615
0	0	0.525978546643845		1	0	0.344094052614768		1	0	0.344094052614768
0	0	0.277790745818902		0	0	0.205845538829061		0	0	0.205845538829061
1	0	0.0966878629182469		0	0	0.278893981995901		0	0	0.278893981995901
0	0	0.0574402787453619		0	0	0.166875129722395		0	0	0.166875129722395
0	0	-0.115357316667399		0	0	0.349516403934061		0	0	0.349516403934061
0	0	0.0335296240340482		0	0	0.278028651755766		0	0	0.278028651755766
0	0	0.26667623913454		1	0	0.360218589321892		1	0	0.360218589321892
1	0	0.412067668752198		0	0	0.153489057929371		0	0	0.153489057929371
0	0	0.108165225372928		0	0	0.419782828860955		0	0	0.419782828860955
0	0	0.162727024405223		0	0	0.409480833037866		0	0	0.409480833037866
0	0	-0.141884802628289		0	0	0.142082150387038		0	0	0.142082150387038
0	0	0.253616247596302		0	0	0.427513469414011		0	0	0.427513469414011
0	0	0.0773583861700482		0	0	0.029817063338076		0	0	0.029817063338076
0	0	0.0298371824276669		0	0	0.249547235277362		0	0	0.249547235277362
0	0	0.463497532283235		0	0	0.211812964196949		0	0	0.211812964196949
0	0	-0.0665023404063511		0	0	0.447954968054637		0	0	0.447954968054637
0	0	0.136566464287785		1	0	0.364736007593718		1	0	0.364736007593718
0	0	0.23350274657251		0	0	0.0827625043740216		0	0	0.0827625043740216
0	0	0.0339192713503759		0	0	0.0399811650606616		0	0	0.0399811650606616
0	0	0.180929520430832		0	0	0.323976418812133		0	0	0.323976418812133
0	0	0.249758302730773		0	0	0.39078875749082		0	0	0.39078875749082
0	0	0.0854344767327437		1	0	0.630006914577941		1	0	0.630006914577941
0	0	-0.213259045861965		0	0	0.195638785299267		0	0	0.195638785299267
0	0	0.284369937739931		0	0	-0.0597530117452393		0	0	-0.0597530117452393
1	0	0.383695425116387		0	0	-0.0201312576026106		0	0	-0.0201312576026106
0	0	0.129650490187864		0	0	0.304890948775857		0	0	0.304890948775857
0	0	-0.0290951100945726		1	0	0.454700892944102		1	0	0.454700892944102
0	0	-0.141316435050811		0	0	0.133977799429915		0	0	0.133977799429915
0	0	0.0940191584958154		0	0	0.162255406131743		0	0	0.162255406131743
0	0	0.117946105046176		1	0	0.410176920962533		1	0	0.410176920962533
0	0	0.16622858468969		1	0	0.574281352595158		1	0	0.574281352595158
0	0	0.0784010586741834		0	0	0.249734023917005		0	0	0.249734023917005
0	0	0.0275785840085214		0	0	0.225041081164888		0	0	0.225041081164888
0	0	0.0583850714156715		0	0	0.131556120246828		0	0	0.131556120246828
0	0	-0.104814608811454		1	0	0.562359772897731		1	0	0.562359772897731
1	0	0.310868121860891		0	0	0.063799751828269		0	0	0.063799751828269
0	0	0.107635937388421		1	0	0.322614348814521		1	0	0.322614348814521
0	0	-0.0467045926527188		1	0	0.6438657439677		1	0	0.6438657439677
0	0	-0.0947140813985164		0	0	0.0762229362589806		0	0	0.0762229362589806
1	0	0.295259993069801		1	0	0.325677136200862		1	0	0.325677136200862
0	0	0.722885477573379		1	0	0.321862616109301		1	0	0.321862616109301
0	0	-0.0473928992851174		1	0	0.253784790111032		1	0	0.253784790111032
0	0	0.0625874485271519		0	0	0.0133414719497461		0	0	0.0133414719497461
0	0	0.144725683819644		0	0	0.19993317348576		0	0	0.19993317348576
0	0	0.123588415749609		0	0	0.0419930263191374		0	0	0.0419930263191374
0	0	-0.149108083626921		0	0	0.0941635351030943		0	0	0.0941635351030943
1	0	0.178724577283816		0	0	0.112961292304728		0	0	0.112961292304728
0	0	0.0967756461001506		0	0	0.159670406861674		0	0	0.159670406861674
0	0	0.159807444062705		0	0	0.199584282033588		0	0	0.199584282033588
0	0	0.267386077665687		0	0	0.097300113145843		0	0	0.097300113145843
0	0	0.374479125402463		0	0	0.143361083878418		0	0	0.143361083878418
0	0	0.265986119524115		0	0	0.140105787250853		0	0	0.140105787250853
0	0	0.00825718834761688		0	0	0.20855040154916		0	0	0.20855040154916
0	0	-0.097227925960801		0	0	0.145969095305798		0	0	0.145969095305798
0	0	0.430308978812037		0	0	0.185604148561252		0	0	0.185604148561252
0	0	0.225659527657388		0	0	0.0258299477723001		0	0	0.0258299477723001
0	0	0.324652247739717		0	0	0.132463857534058		0	0	0.132463857534058
1	0	0.470906052675824		0	0	0.0385310187019188		0	0	0.0385310187019188
1	0	0.648360693959748		0	0	0.0503701346983916		0	0	0.0503701346983916
0	0	0.22505391515887		0	0	0.0847302514254394		0	0	0.0847302514254394
0	0	0.119611141890104		0	0	0.431571915884332		0	0	0.431571915884332
0	0	0.249242131014751		0	0	0.208689908794302		0	0	0.208689908794302
0	0	0.157830688563164		0	0	0.116940999048725		0	0	0.116940999048725
0	0	0.250641683987756		1	0	0.393723785358738		1	0	0.393723785358738
0	0	-0.163638935930005		1	0	0.158430528149026		1	0	0.158430528149026
0	0	0.167828791559303		0	0	0.118001244821884		0	0	0.118001244821884
0	0	0.319315473813698		1	0	0.335240304200356		1	0	0.335240304200356
0	0	0.147214255354912		0	0	0.143563992031581		0	0	0.143563992031581
0	0	0.191163427619378		0	0	-0.062392160455022		0	0	-0.062392160455022
0	0	0.157299348884495		0	0	-0.024608477321147		0	0	-0.024608477321147
0	0	0.279202912384177		0	0	0.0195761077295511		0	0	0.0195761077295511
0	0	0.33092839670368		1	0	0.348223649760784		1	0	0.348223649760784
0	0	0.408378934103223		0	0	0.0886066096629625		0	0	0.0886066096629625
0	0	0.00757104108767137		0	0	0.196375448277717		0	0	0.196375448277717
0	0	0.11858939126896		1	0	0.358468159792977		1	0	0.358468159792977
0	0	0.209657978520245		1	0	0.35318066416837		1	0	0.35318066416837
0	0	0.244489278110305		1	0	0.241472598803479		1	0	0.241472598803479
0	0	0.16693753518653		0	0	0.240724965291418		0	0	0.240724965291418
0	0	0.547099036378392		0	0	0.225210737963399		0	0	0.225210737963399
0	0	0.158085736702864		0	0	0.482043120530775		0	0	0.482043120530775
0	0	-0.0146618908307468		0	0	0.181407617955346		0	0	0.181407617955346
0	0	-0.125906833078153		0	0	0.227060608043449		0	0	0.227060608043449
0	0	0.230969692189627		0	0	0.254830256595917		0	0	0.254830256595917
0	0	0.445285903547591		0	0	0.318333494420735		0	0	0.318333494420735
0	0	0.0449365607957612		0	0	-0.0764112870602033		0	0	-0.0764112870602033
0	0	0.275454128208047		0	0	0.0927653661337475		0	0	0.0927653661337475
0	0	0.406049517848047		0	0	0.254470882580435		0	0	0.254470882580435
0	0	0.256463387321996		0	0	0.256625585732298		0	0	0.256625585732298
0	0	0.133838605371073		0	0	0.077227805579148		0	0	0.077227805579148
0	0	0.248762225506101		1	0	0.494216446003018		1	0	0.494216446003018
1	0	0.440443320922586		0	0	0.255800393013625		0	0	0.255800393013625
0	0	0.106795816999109		0	0	0.162974544883872		0	0	0.162974544883872
0	0	0.0897379774846895		1	0	0.404640471448483		1	0	0.404640471448483
0	0	-0.0850060993476464		0	0	-0.00916271027655278		0	0	-0.00916271027655278
0	0	0.268437154954982		1	0	0.284215547340044		1	0	0.284215547340044
0	0	0.201659850864135		0	0	0.155480447564888		0	0	0.155480447564888
0	0	0.331138513581023		0	0	0.278708442115481		0	0	0.278708442115481
0	0	0.0816083970151476		0	0	0.345053243858137		0	0	0.345053243858137
0	0	0.311139744640018		0	0	-0.0585829358168523		0	0	-0.0585829358168523
0	0	0.518241131379155		0	0	0.125494660414424		0	0	0.125494660414424
0	0	0.206857337401346		0	0	0.0805822096111071		0	0	0.0805822096111071
0	0	0.437282071423176		0	0	0.108920879077895		0	0	0.108920879077895
1	0	0.466188897695202		0	0	0.289601837607102		0	0	0.289601837607102
0	0	-0.0490048217248242		0	0	0.0512247640635184		0	0	0.0512247640635184
0	0	0.205671869339441		0	0	0.212666075016811		0	0	0.212666075016811
0	0	-0.130967675201796		1	0	0.306532998507619		1	0	0.306532998507619
0	0	0.182084773085026		1	0	0.529216870756774		1	0	0.529216870756774
0	0	0.109097362311813		0	0	-0.0161174525395688		0	0	-0.0161174525395688
0	0	0.248388041279042		0	0	0.41799070904135		0	0	0.41799070904135
0	0	0.272143261293947		0	0	0.132802987939976		0	0	0.132802987939976
0	0	0.0792832808286553		0	0	0.232454162222129		0	0	0.232454162222129
0	0	0.354639905494852		1	0	0.136808283642867		1	0	0.136808283642867
1	0	0.283752140506031		0	0	0.197141274281562		0	0	0.197141274281562
1	0	0.657986869038944		1	0	0.305671215134775		1	0	0.305671215134775
0	0	-0.0623595069732827		0	0	0.0197553631467585		0	0	0.0197553631467585
1	0	0.436595063948384		0	0	0.258818450692953		0	0	0.258818450692953
0	0	-0.235357353673359		0	0	0.0909845577494324		0	0	0.0909845577494324
0	0	0.327533163096071		0	0	0.38514138355036		0	0	0.38514138355036
0	0	0.246978996376618		0	0	0.128571044930479		0	0	0.128571044930479
1	0	0.139201450067822		0	0	0.448231152267244		0	0	0.448231152267244
0	0	0.170419312134051		1	0	0.60289253441494		1	0	0.60289253441494
0	0	0.225666893556065		0	0	0.242666159468327		0	0	0.242666159468327
0	0	0.322081891029718		0	0	0.309487895274757		0	0	0.309487895274757
0	0	0.356232000327452		0	0	0.0829512395183205		0	0	0.0829512395183205
0	0	-0.174233196831255		0	0	0.254659436047515		0	0	0.254659436047515
1	0	0.321936468331165		1	0	0.251496121873498		1	0	0.251496121873498
0	0	0.315295734043619		0	0	0.306456407024298		0	0	0.306456407024298
0	0	0.308621945610642		0	0	0.195007449938534		0	0	0.195007449938534
0	0	0.249115287494878		0	0	0.209097874219089		0	0	0.209097874219089
0	0	0.202094036924714		0	0	-0.0908801195197536		0	0	-0.0908801195197536
1	0	0.263863469215633		0	0	0.078564500492085		0	0	0.078564500492085
0	0	0.278487546828719		1	0	0.27683080472439		1	0	0.27683080472439
0	0	0.231498029212941		0	0	0.407486591818567		0	0	0.407486591818567
1	0	0.453727857833243		1	0	0.327424044635326		1	0	0.327424044635326
0	0	0.172145872749973		0	0	0.529510290444041		0	0	0.529510290444041
0	0	0.123440313315001		1	0	0.570555358700109		1	0	0.570555358700109
0	0	0.249342223417843		0	0	0.221209024842182		0	0	0.221209024842182
1	0	0.415711803101146		0	0	0.118772276442233		0	0	0.118772276442233
0	0	0.690098300896376		0	0	0.432998123311945		0	0	0.432998123311945
0	0	0.0605087607225764		0	0	0.0843381848416753		0	0	0.0843381848416753
0	0	0.222745799778817		0	0	-0.0114783125231196		0	0	-0.0114783125231196
0	0	0.121264019541625		1	0	0.386951970377941		1	0	0.386951970377941
0	0	-0.1738230108056		0	0	0.316524233161134		0	0	0.316524233161134
0	0	0.353830223320769		0	0	0.147871782555529		0	0	0.147871782555529
0	0	0.320216362407919		1	0	0.4048107178995		1	0	0.4048107178995
0	0	0.40240183410166		0	0	-0.00200199306496426		0	0	-0.00200199306496426
0	0	-0.0375160643154756		0	0	0.248834935721484		0	0	0.248834935721484
0	0	-0.0187252743106403		0	0	0.263616256321495		0	0	0.263616256321495
0	0	0.720364601255492		0	0	0.198346116477846		0	0	0.198346116477846
0	0	-0.114403267632674		0	0	0.232735871497648		0	0	0.232735871497648
0	0	0.157124062132937		1	0	0.282108497954174		1	0	0.282108497954174
0	0	0.0571071806178117		0	0	0.294640730844115		0	0	0.294640730844115
0	0	0.258828707510345		0	0	0.169940389236473		0	0	0.169940389236473
0	0	0.212590846238032		1	0	0.416687655112229		1	0	0.416687655112229
0	0	0.306174054404458		0	0	0.365622879302936		0	0	0.365622879302936
0	0	0.161854593903939		0	0	0.13425538003512		0	0	0.13425538003512
0	0	0.129026979796715		0	0	0.121907517639039		0	0	0.121907517639039
0	0	0.428089346548574		1	0	0.220709090809408		1	0	0.220709090809408
0	0	0.337782416504434		0	0	0.183581880258705		0	0	0.183581880258705
1	0	0.202394809275215		0	0	0.297349108658104		0	0	0.297349108658104
0	0	-0.0181425804679337		0	0	0.224027509856612		0	0	0.224027509856612
0	0	0.127638653124408		0	0	0.221355580004333		0	0	0.221355580004333
0	0	0.0348013706452501		1	0	0.383554971702079		1	0	0.383554971702079
0	0	-0.166395118032125		1	0	0.339613300875416		1	0	0.339613300875416
0	0	0.562348954345373		0	0	0.189291231244372		0	0	0.189291231244372
0	0	0.526600681712497		0	0	0.305131375536857		0	0	0.305131375536857
0	0	0.22825548089558		0	0	0.201990092768566		0	0	0.201990092768566
0	0	0.307897021871728		0	0	0.203053019439769		0	0	0.203053019439769
0	0	0.240247438105913		0	0	0.15757829382849		0	0	0.15757829382849
0	0	0.138174779398194		0	0	0.48442573617404		0	0	0.48442573617404
0	0	0.166670812703325		0	0	0.0474063719595877		0	0	0.0474063719595877
0	0	0.123173143623577		0	0	0.357134526033755		0	0	0.357134526033755
0	0	0.34369253640917		0	0	0.338139625327077		0	0	0.338139625327077
0	0	-0.0865328687371907		1	0	0.393944259238334		1	0	0.393944259238334
0	0	0.0915501522158926		0	0	0.0758880324096759		0	0	0.0758880324096759
1	0	0.197075208038654		0	0	0.00292104030937202		0	0	0.00292104030937202
0	0	-0.0251863450212917		1	0	0.682361238517174		1	0	0.682361238517174
0	0	0.0843100022575723		0	0	0.505097982855825		0	0	0.505097982855825
1	0	0.467681622479534		0	0	0.0106311993734872		0	0	0.0106311993734872
0	0	0.00305419834092913		0	0	0.232768218589266		0	0	0.232768218589266
0	0	0.330824335140687		0	0	0.14909368913637		0	0	0.14909368913637
0	0	0.226729073472875		0	0	0.194918623531026		0	0	0.194918623531026
1	0	0.340894467564397		0	0	0.262529577742535		0	0	0.262529577742535
1	0	0.288293052832272		0	0	0.249669693119553		0	0	0.249669693119553
0	0	0.0443562142752012		0	0	0.117479040260372		0	0	0.117479040260372
0	0	0.173243722483083		0	0	0.153042812384909		0	0	0.153042812384909
0	0	0.261140192996359		0	0	0.212716443056324		0	0	0.212716443056324
0	0	0.149843053684016		0	0	0.192269141016888		0	0	0.192269141016888
0	0	0.174159591758697		0	0	0.197987549411879		0	0	0.197987549411879
0	0	-0.0175013576033923		1	0	0.441846198150621		1	0	0.441846198150621
0	0	0.105447034681423		0	0	0.16053747046964		0	0	0.16053747046964
1	0	0.39404904010714		1	0	0.295208887653959		1	0	0.295208887653959
0	0	0.280248051734952		0	0	0.158126511900234		0	0	0.158126511900234
0	0	0.205720021118903		1	0	0.684077626165791		1	0	0.684077626165791
0	0	0.247883410055368		1	0	0.523825667796856		1	0	0.523825667796856
0	0	0.117009454443412		0	0	0.14617276694964		0	0	0.14617276694964
0	0	0.120485842489479		0	0	0.209925467009197		0	0	0.209925467009197
0	0	0.155810295859605		0	0	0.000177383488094522		0	0	0.000177383488094522
0	0	0.278048087790463		0	0	0.192911026289545		0	0	0.192911026289545
0	0	0.269805188593555		0	0	0.323012492811952		0	0	0.323012492811952
0	0	0.26595027687196		0	0	0.28929703493984		0	0	0.28929703493984
1	0	0.117910476522533		0	0	0.122425151651389		0	0	0.122425151651389
0	0	0.458080489465711		0	0	0.690351360191918		0	0	0.690351360191918
0	0	0.396672810715605		0	0	0.273254684087756		0	0	0.273254684087756
0	0	0.312350505707264		0	0	0.104723694965938		0	0	0.104723694965938
1	0	0.497872718957753		0	0	0.0645373621467862		0	0	0.0645373621467862
0	0	0.23358787622958		0	0	0.207118460942458		0	0	0.207118460942458
0	0	0.283331721986716		1	0	0.494460940875314		1	0	0.494460940875314
1	0	0.0231815512934969		0	0	0.161376569261223		0	0	0.161376569261223
0	0	0.158561604042994		0	0	0.255146090837489		0	0	0.255146090837489
0	0	0.192352694654564		0	0	0.231678298662992		0	0	0.231678298662992
0	0	0.824269529886743		0	0	0.164211330552486		0	0	0.164211330552486
0	0	0.107008001075581		0	0	0.185631749963346		0	0	0.185631749963346
0	0	0.145304033419865		0	0	0.202286419448309		0	0	0.202286419448309
0	0	0.102138850410235		1	0	0.416885877203833		1	0	0.416885877203833
0	0	0.311215715885945		0	0	0.186548070058833		0	0	0.186548070058833
0	0	0.463435494983491		0	0	0.164309353506215		0	0	0.164309353506215
0	0	0.136003692473333		0	0	0.109952893862105		0	0	0.109952893862105
0	0	0.311730977535744		0	0	0.343656890968981		0	0	0.343656890968981
0	0	0.423121396724548		0	0	0.122164052050798		0	0	0.122164052050798
0	0	0.0148549006804581		0	0	0.336481800259788		0	0	0.336481800259788
0	0	0.382133686344071		0	0	0.157508127827049		0	0	0.157508127827049
0	0	0.218517218895128		0	0	0.353490433749135		0	0	0.353490433749135
0	0	-0.00504720979959283		0	0	0.146186488150773		0	0	0.146186488150773
0	0	0.253458965596139		0	0	0.232747040053607		0	0	0.232747040053607
1	0	0.241185046843715		1	0	0.548192113031367		1	0	0.548192113031367
0	0	0.0772468624193235		0	0	0.203421406469877		0	0	0.203421406469877
0	0	0.062260286765728		1	0	0.543188804188461		1	0	0.543188804188461
0	0	0.162034304781901		0	0	0.202986136082398		0	0	0.202986136082398
0	0	0.0660815257283797		1	0	0.190710782900091		1	0	0.190710782900091
0	0	0.150120649616882		0	0	0.139785579359919		0	0	0.139785579359919
0	0	-0.0339258743399853		0	0	0.15205616572807		0	0	0.15205616572807
0	0	0.321567721601753		0	0	0.217047423955391		0	0	0.217047423955391
0	0	-0.00351363017016665		0	0	0.298178766745752		0	0	0.298178766745752
0	0	-0.0626858547806773		0	0	0.217324667859734		0	0	0.217324667859734
0	0	0.313438008874396		0	0	0.036862516455138		0	0	0.036862516455138
0	0	0.39798561657097		0	0	0.326074314786308		0	0	0.326074314786308
0	0	0.310883744824387		1	0	0.352144006155386		1	0	0.352144006155386
0	0	0.135529579940968		0	0	0.484525165889774		0	0	0.484525165889774
0	0	0.0769558661636719		0	0	-0.0398885783001958		0	0	-0.0398885783001958
0	0	0.42970568167996		0	0	0.368302291006323		0	0	0.368302291006323
0	0	0.151711583582856		0	0	0.188433869244801		0	0	0.188433869244801
0	0	0.171303980029282		0	0	0.271485701078769		0	0	0.271485701078769
0	0	0.14783743695894		0	0	0.316740013789874		0	0	0.316740013789874
0	0	0.403988001883989		0	0	0.277665189770968		0	0	0.277665189770968
0	0	0.100041900121678		0	0	0.331409048046061		0	0	0.331409048046061
0	0	0.0181329530895004		0	0	0.174217590708737		0	0	0.174217590708737
0	0	0.401077193985916		0	0	0.386298665396917		0	0	0.386298665396917
0	0	0.373235063884069		0	0	0.221468956988862		0	0	0.221468956988862
0	0	-0.145337599332157		0	0	0.0762285435281504		0	0	0.0762285435281504
0	0	0.198019429621006		0	0	0.281874791378852		0	0	0.281874791378852
0	0	0.459236873067444		0	0	0.289683042566616		0	0	0.289683042566616
0	0	0.167801172697873		0	0	0.612098833769218		0	0	0.612098833769218
0	0	0.317148668116723		1	0	0.32409658283267		1	0	0.32409658283267
0	0	0.0475763389158206		0	0	0.12591868018596		0	0	0.12591868018596
1	0	0.650108432472288		0	0	0.246299141222356		0	0	0.246299141222356
0	0	0.408309851727878		0	0	0.299296158303633		0	0	0.299296158303633
0	0	0.410086027204055		0	0	0.227116990175205		0	0	0.227116990175205
0	0	0.111607790749083		0	0	0.218097133159614		0	0	0.218097133159614
0	0	0.447069230691222		1	0	0.253148247352695		1	0	0.253148247352695
0	0	0.285282490588909		0	0	0.109267234745666		0	0	0.109267234745666
0	0	0.495382899493995		1	0	0.312371109491955		1	0	0.312371109491955
0	0	0.169976161227233		0	0	0.138529397804529		0	0	0.138529397804529
1	0	0.55773118448297		1	0	0.54260821328146		1	0	0.54260821328146
0	0	0.309225703391583		0	0	0.0100624114652627		0	0	0.0100624114652627
0	0	0.136495696814611		1	0	0.292171915067117		1	0	0.292171915067117
0	0	0.255617968347327		1	0	0.339538308843403		1	0	0.339538308843403
0	0	0.218932598954136		0	0	0.331238838344859		0	0	0.331238838344859
0	0	0.229761650247413		0	0	0.175635022460927		0	0	0.175635022460927
0	0	-0.0912176922457492		0	0	0.203805696629375		0	0	0.203805696629375
0	0	0.0751841517327683		0	0	0.105228990302167		0	0	0.105228990302167
0	0	0.0670391629532391		0	0	0.130459962803578		0	0	0.130459962803578
0	0	0.260293087899428		1	0	0.431525305318682		1	0	0.431525305318682
1	0	0.494615572857846		0	0	0.379668283517443		0	0	0.379668283517443
0	0	0.122456442515113		0	0	0.208092630583978		0	0	0.208092630583978
0	0	0.388630516088306		1	0	0.514893485086729		1	0	0.514893485086729
0	0	0.208354924665235		0	0	0.621064311353815		0	0	0.621064311353815
0	0	0.183869069963407		1	0	0.415398123473771		1	0	0.415398123473771
1	0	0.395072625832954		0	0	0.342519016484416		0	0	0.342519016484416
1	0	0.504998270559824		0	0	0.0740792794955413		0	0	0.0740792794955413
0	0	0.442884628625877		0	0	-0.0275172746844815		0	0	-0.0275172746844815
0	0	0.160643879882654		0	0	-0.0015222113157633		0	0	-0.0015222113157633
0	0	0.14692710918164		0	0	0.06881537623807		0	0	0.06881537623807
0	0	0.126156811402932		0	0	0.324258752483088		0	0	0.324258752483088
1	0	0.450374577684166		0	0	0.020109804795332		0	0	0.020109804795332
0	0	0.369114745748352		0	0	0.145115213693476		0	0	0.145115213693476
1	0	0.290919168841806		0	0	0.190121483711119		0	0	0.190121483711119
0	0	0.294334224478623		0	0	0.039976533175295		0	0	0.039976533175295
1	0	0.461772005829454		0	0	-0.0370178360441299		0	0	-0.0370178360441299
0	0	-0.150353807850887		1	0	0.19750712356068		1	0	0.19750712356068
0	0	0.21165416006894		0	0	0.288272189112981		0	0	0.288272189112981
0	0	-0.0865364193048943		0	0	0.232992768895444		0	0	0.232992768895444
0	0	0.303406063695858		0	0	0.36019829013651		0	0	0.36019829013651
0	0	0.0766519479023015		0	0	0.20502428842009		0	0	0.20502428842009
0	0	0.14906287017592		0	0	0.18673426757271		0	0	0.18673426757271
0	0	0.0049996639041696		0	0	0.251510990506856		0	0	0.251510990506856
0	0	0.169857948693298		0	0	0.29813908042751		0	0	0.29813908042751
0	0	0.240098788242668		0	0	0.293358606738858		0	0	0.293358606738858
0	0	0.162349470059794		0	0	0.0140653959642		0	0	0.0140653959642
0	0	0.040281966648914		1	0	0.60130946045945		1	0	0.60130946045945
0	0	0.127002336554159		0	0	0.369301246409084		0	0	0.369301246409084
0	0	0.136024241861562		0	0	0.336077013968624		0	0	0.336077013968624
0	0	0.0118913669598603		0	0	0.286315164275081		0	0	0.286315164275081
0	0	0.460649233502222		1	0	0.415036127440232		1	0	0.415036127440232
1	0	0.396391752124058		0	0	0.232034167323835		0	0	0.232034167323835
0	0	0.402878609682874		0	0	0.153343182054829		0	0	0.153343182054829
1	0	0.36351745893589		0	0	0.541730005906526		0	0	0.541730005906526
0	0	0.205117666679657		1	0	0.424043635851475		1	0	0.424043635851475
0	0	0.308527331026994		0	0	0.0704914450468948		0	0	0.0704914450468948
1	0	0.565014238716295		1	0	0.385465034915271		1	0	0.385465034915271
0	0	0.370656124296709		0	0	0.2936564249896		0	0	0.2936564249896
0	0	0.253349769072174		0	0	0.199044703073868		0	0	0.199044703073868
0	0	0.110875041232202		0	0	-0.0770835063804439		0	0	-0.0770835063804439
1	0	0.608351890693717		0	0	0.131027726712832		0	0	0.131027726712832
0	0	0.292105619114239		0	0	0.148777942949501		0	0	0.148777942949501
0	0	0.351980513925084		0	0	0.407575017705814		0	0	0.407575017705814
0	0	0.158100385508261		0	0	0.214940520583053		0	0	0.214940520583053
0	0	0.195491907303511		0	0	0.196833314646983		0	0	0.196833314646983
1	0	0.478318469125902		0	0	0.372670100393098		0	0	0.372670100393098
0	0	0.112981881886016		0	0	0.200187207067811		0	0	0.200187207067811
0	0	0.0413331835090468		0	0	0.206612109858825		0	0	0.206612109858825
0	0	0.0854917461472009		1	0	0.530643275321469		1	0	0.530643275321469
0	0	0.252817703374253		0	0	0.409992236698415		0	0	0.409992236698415
0	0	0.0775128898691204		0	0	0.13433604429805		0	0	0.13433604429805
0	0	0.226506550364888		0	0	0.137789217667803		0	0	0.137789217667803
0	0	0.140293990451579		1	0	0.180900512362566		1	0	0.180900512362566
0	0	0.238785039009711		0	0	0.0867254238073791		0	0	0.0867254238073791
0	0	0.142495653500094		0	0	0.276341405163141		0	0	0.276341405163141
0	0	0.245396281330543		0	0	0.214534538183947		0	0	0.214534538183947
0	0	0.0755954152898834		1	0	0.530431682266496		1	0	0.530431682266496
0	0	0.0666402568690806		0	0	0.334709476911756		0	0	0.334709476911756
0	0	0.0858455061887804		0	0	-0.0955537436151368		0	0	-0.0955537436151368
0	0	0.313748006992758		0	0	0.40769492694507		0	0	0.40769492694507
0	0	0.294200157904916		0	0	0.22484510503679		0	0	0.22484510503679
0	0	0.400864078041759		0	0	-0.111587194772347		0	0	-0.111587194772347
0	0	0.279069153347403		0	0	0.20505741280803		0	0	0.20505741280803
0	0	0.374298457490982		0	0	0.316978223440258		0	0	0.316978223440258
0	0	0.341022898758699		1	0	0.357887879896902		1	0	0.357887879896902
0	0	-0.11197037973189		0	0	0.19060331529738		0	0	0.19060331529738
0	0	0.372510808477439		0	0	0.341914713258582		0	0	0.341914713258582
1	0	0.201686937317357		0	0	0.465837169174994		0	0	0.465837169174994
0	0	0.341062544773221		0	0	0.312996110012573		0	0	0.312996110012573
0	0	0.244858234170272		0	0	0.0206464576024686		0	0	0.0206464576024686
1	0	0.477167960142755		0	0	0.219529304276637		0	0	0.219529304276637
0	0	0.110810460334505		0	0	0.295793474564019		0	0	0.295793474564019
0	0	0.172230012899255		1	0	0.175491603208988		1	0	0.175491603208988
0	0	0.413151312818232		0	0	0.0917954075631643		0	0	0.0917954075631643
0	0	0.416075498582033		1	0	0.454990172245165		1	0	0.454990172245165
0	0	0.216030351356688		0	0	0.285765627789415		0	0	0.285765627789415
0	0	0.139823508610296		1	0	1.32075941306589		1	0	1.32075941306589
0	0	0.144522098971759		0	0	0.307601266412266		0	0	0.307601266412266
0	0	0.472354360655067		1	0	0.313591383589846		1	0	0.313591383589846
1	0	0.31510430002137		0	0	0.172936275725054		0	0	0.172936275725054
0	0	0.245763210027625		0	0	0.175377958864354		0	0	0.175377958864354
0	0	0.32645485826599		0	0	0.35784968440239		0	0	0.35784968440239
0	0	0.381585181781165		0	0	0.10927719495258		0	0	0.10927719495258
0	0	0.678800880567309		1	0	0.280367607843826		1	0	0.280367607843826
0	0	0.379805178189692		1	0	0.358558706507148		1	0	0.358558706507148
0	0	0.10526504757975		0	0	0.133447441413398		0	0	0.133447441413398
0	0	0.334796249596878		1	0	0.58239133262624		1	0	0.58239133262624
0	0	0.132362485302996		1	0	0.55570789907603		1	0	0.55570789907603
0	0	0.171040122164682		0	0	0.324780690186822		0	0	0.324780690186822
0	0	0.27226588943118		0	0	0.310710884811967		0	0	0.310710884811967
0	0	-0.0670804578333058		0	0	0.1734421453397		0	0	0.1734421453397
1	0	0.56362283522695		0	0	0.196279609042729		0	0	0.196279609042729
0	0	0.217411676231921		0	0	0.249364940409173		0	0	0.249364940409173
0	0	0.391948590455154		1	0	0.581654579534531		1	0	0.581654579534531
0	0	0.202975244706633		0	0	0.363975068536363		0	0	0.363975068536363
0	0	0.283291779471758		0	0	0.300329007131071		0	0	0.300329007131071
0	0	0.250694663046788		0	0	0.353404792925311		0	0	0.353404792925311
0	0	0.305182917328735		0	0	0.278945425158681		0	0	0.278945425158681
0	0	0.194826344083165		0	0	0.252480979057495		0	0	0.252480979057495
1	0	0.34703910052839		1	0	0.34900773765966		1	0	0.34900773765966
0	0	0.434451443739061		0	0	0.178377975071471		0	0	0.178377975071471
0	0	0.297321335138314		0	0	0.305707670807966		0	0	0.305707670807966
0	0	0.285418119592653		0	0	0.117559042454551		0	0	0.117559042454551
0	0	0.207923490375215		0	0	0.0591697588932326		0	0	0.0591697588932326
0	0	0.111331645919317		0	0	0.280932548537093		0	0	0.280932548537093
1	0	0.0966723969436214		0	0	0.058949154460684		0	0	0.058949154460684
0	0	0.103507038567039		0	0	0.266695087114416		0	0	0.266695087114416
0	0	0.258549797839676		0	0	0.207931915896147		0	0	0.207931915896147
0	0	0.32409207754246		1	0	0.307474181067772		1	0	0.307474181067772
0	0	0.0970050406382922		0	0	0.188925215435899		0	0	0.188925215435899
0	0	0.0463493297302492		0	0	0.285642623651135		0	0	0.285642623651135
0	0	0.214544841838225		0	0	0.00086472856234902		0	0	0.00086472856234902
0	0	0.434710891124891		1	0	0.251900632912483		1	0	0.251900632912483
0	0	0.144474559778157		0	0	0.235873491583619		0	0	0.235873491583619
0	0	0.214448553179251		0	0	0.428430318546848		0	0	0.428430318546848
0	0	0.147264212755046		0	0	0.294228420319308		0	0	0.294228420319308
0	0	0.277052068590378		0	0	0.391917415020134		0	0	0.391917415020134
1	0	0.33432657688466		1	0	0.188309504691209		1	0	0.188309504691209
0	0	0.272357672316227		1	0	0.824144591671637		1	0	0.824144591671637
0	0	0.261990392996755		0	0	0.0873170952749449		0	0	0.0873170952749449
0	0	0.0798080099932052		0	0	-0.0164977992732688		0	0	-0.0164977992732688
1	0	0.143919658177322		0	0	0.365280421701358		0	0	0.365280421701358
0	0	0.291590064992764		0	0	0.364707729173014		0	0	0.364707729173014
0	0	0.170785750430813		1	0	0.339612134115139		1	0	0.339612134115139
0	0	0.224862841250551		0	0	0.29650526996075		0	0	0.29650526996075
0	0	0.277518455784628		0	0	0.417843316331148		0	0	0.417843316331148
0	0	0.207190994983669		0	0	0.268083695515013		0	0	0.268083695515013
0	0	0.48875903076645		0	0	0.449912649237913		0	0	0.449912649237913
0	0	0.404824173020178		0	0	0.114411037767398		0	0	0.114411037767398
0	0	0.393436977235504		0	0	0.378222127904256		0	0	0.378222127904256
0	0	0.24865297049001		0	0	0.360191647923665		0	0	0.360191647923665
1	0	0.373257996076928		0	0	0.0418025065807378		0	0	0.0418025065807378
0	0	0.181088839975789		0	0	0.176444730971022		0	0	0.176444730971022
0	0	0.574136535060421		0	0	0.187129350446215		0	0	0.187129350446215
1	0	0.180490703433042		0	0	0.238220866790579		0	0	0.238220866790579
0	0	0.2914062135408		0	0	0.174638680670139		0	0	0.174638680670139
0	0	0.0787120478095483		0	0	0.239180290693011		0	0	0.239180290693011
1	0	0.743317632725946		1	0	0.295323948068342		1	0	0.295323948068342
0	0	-0.159988668290471		1	0	0.433355809262099		1	0	0.433355809262099
0	0	0.247549617435089		0	0	0.0820438534962329		0	0	0.0820438534962329
1	0	0.730959227607706		1	0	0.461106314974037		1	0	0.461106314974037
0	0	0.25019906081041		0	0	0.102581696763747		0	0	0.102581696763747
0	0	0.118151703082456		0	0	0.317372096050461		0	0	0.317372096050461
0	0	0.410104814440057		0	0	0.107673690584237		0	0	0.107673690584237
0	0	0.324510321270925		0	0	0.175138613906675		0	0	0.175138613906675
0	0	0.155181731480028		0	0	0.386500111609261		0	0	0.386500111609261
0	0	0.358846012530491		0	0	0.327087860863456		0	0	0.327087860863456
0	0	0.483233986632484		0	0	0.0831491281149112		0	0	0.0831491281149112
0	0	0.2971475320533		0	0	0.0552942016826322		0	0	0.0552942016826322
0	0	-0.00826428161586691		0	0	0.00247658698885502		0	0	0.00247658698885502
0	0	0.569161942705654		0	0	-0.00961769355901401		0	0	-0.00961769355901401
0	0	0.36629129798365		0	0	0.314752621299894		0	0	0.314752621299894
0	0	0.17025302065712		0	0	0.143559511912419		0	0	0.143559511912419
1	0	0.362012302101676		1	0	0.351366941713191		1	0	0.351366941713191
0	0	0.189702599813646		0	0	-0.000621557338259851		0	0	-0.000621557338259851
0	0	-0.065027025761138		0	0	0.353877024197969		0	0	0.353877024197969
0	0	0.112089362213948		0	0	0.260966327097414		0	0	0.260966327097414
1	0	0.376812207325797		0	0	-0.0489714151158162		0	0	-0.0489714151158162
0	0	0.189716246682383		0	0	0.158163893457015		0	0	0.158163893457015
0	0	0.181844285035422		0	0	-0.127368821764025		0	0	-0.127368821764025
0	0	0.353398890006167		0	0	0.253255833650255		0	0	0.253255833650255
0	0	-0.0755476991803504		0	0	0.386164531101415		0	0	0.386164531101415
0	0	0.166147706531883		0	0	0.579163914847172		0	0	0.579163914847172
0	0	0.134883745942461		0	0	0.27932651796215		0	0	0.27932651796215
0	0	0.183549759444476		0	0	0.0447279419940835		0	0	0.0447279419940835
1	0	0.3812257080773		0	0	0.188727652552666		0	0	0.188727652552666
0	0	0.268965813309972		0	0	0.648408080210509		0	0	0.648408080210509
0	0	0.334588376530465		1	0	0.546490737856582		1	0	0.546490737856582
1	0	0.361349854931793		0	0	0.177286803082448		0	0	0.177286803082448
0	0	-0.0273216591622644		0	0	0.166528605983808		0	0	0.166528605983808
1	0	0.358825657632009		0	0	0.319321098823298		0	0	0.319321098823298
0	0	0.100644297218015		1	0	0.741616269463307		1	0	0.741616269463307
0	0	0.359795364248744		0	0	0.0749160771896039		0	0	0.0749160771896039
0	0	0.0705172549757022		1	0	0.529196063585565		1	0	0.529196063585565
0	0	0.246755669921583		0	0	-0.00737704270897147		0	0	-0.00737704270897147
0	0	0.142403747417224		1	0	0.185287558436222		1	0	0.185287558436222
0	0	0.258053619972293		0	0	-0.00655802169936583		0	0	-0.00655802169936583
1	0	0.358478442188196		1	0	0.23238711706234		1	0	0.23238711706234
1	0	0.486205475283106		0	0	0.563853944130091		0	0	0.563853944130091
0	0	0.250606723690143		0	0	0.217267843821404		0	0	0.217267843821404
0	0	-0.0161484395748799		0	0	0.0381101615013425		0	0	0.0381101615013425
0	0	0.0868128497745507		0	0	0.0257444612287457		0	0	0.0257444612287457
1	0	0.687706010061774		0	0	0.0062498598953722		0	0	0.0062498598953722
1	0	0.335967069648557		0	0	-0.0479858094918053		0	0	-0.0479858094918053
0	0	0.0603715539261707		0	0	0.199034993799163		0	0	0.199034993799163
1	0	0.438946866760461		0	0	0.147169681327681		0	0	0.147169681327681
0	0	0.172755244646622		1	0	0.456220127644509		1	0	0.456220127644509
0	0	0.128973527828497		0	0	0.243216505800645		0	0	0.243216505800645
0	0	0.274700769104845		0	0	0.138464524371762		0	0	0.138464524371762
1	0	0.495249582172423		0	0	0.455148209829916		0	0	0.455148209829916
1	0	0.286364914420588		0	0	0.255967324073598		0	0	0.255967324073598
0	0	0.32161887857736		1	0	0.497811575653324		1	0	0.497811575653324
0	0	0.307858313362748		0	0	0.103160778263531		0	0	0.103160778263531
1	0	0.295622948472198		0	0	0.123048962284622		0	0	0.123048962284622
0	0	0.190434708171855		0	0	0.422094219087118		0	0	0.422094219087118
0	0	0.408839879637145		0	0	-0.0464213190717424		0	0	-0.0464213190717424
1	0	0.411312681029661		0	0	0.237767693537848		0	0	0.237767693537848
0	0	0.0711869964430677		0	0	0.118709210368097		0	0	0.118709210368097
1	0	0.463856259245706		0	0	0.256113051885878		0	0	0.256113051885878
1	0	0.521870618331094		0	0	0.504280146518885		0	0	0.504280146518885
1	0	0.589714675747308		1	0	0.220661502788998		1	0	0.220661502788998
0	0	-0.016370444933756		0	0	0.373084951709337		0	0	0.373084951709337
0	0	0.408141694567643		0	0	0.118668119644623		0	0	0.118668119644623
0	0	0.422177844084717		0	0	0.364473288529862		0	0	0.364473288529862
0	0	0.282353187644092		1	0	0.314197297714457		1	0	0.314197297714457
0	0	0.473577794041044		0	0	0.15892662877818		0	0	0.15892662877818
0	0	0.0240116763204706		0	0	0.438602952750961		0	0	0.438602952750961
0	0	0.191647704436935		0	0	0.327739611429789		0	0	0.327739611429789
0	0	0.243590470934735		0	0	0.176125324817717		0	0	0.176125324817717
1	0	0.263441427675352		0	0	-0.0600403124911972		0	0	-0.0600403124911972
0	0	0.207689770271489		1	0	0.314853740480297		1	0	0.314853740480297
0	0	0.279085787898603		1	0	0.321944338238022		1	0	0.321944338238022
0	0	0.26094632985491		1	0	0.316818427549864		1	0	0.316818427549864
0	0	0.197385505516644		1	5	0.576617445215647		1	5	0.576617445215647
0	0	0.182911507745953		0	7	0.112237632482755		0	7	0.112237632482755
1	0	0.212416497333021		0	6	0.0845505889493227		0	6	0.0845505889493227
0	0	0.128876252787185		0	4	0.328528919791214		0	4	0.328528919791214
1	0	0.266943346852197		0	5	0.115388851532381		0	5	0.115388851532381
1	0	0.344202610610842		0	6	-0.0110700168106224		0	6	-0.0110700168106224
1	0	0.448152119661415		0	8	-0.189621066723736		0	8	-0.189621066723736
1	0	0.214722583781241		0	2	0.0688657985747331		0	2	0.0688657985747331
1	0	0.585305175398024		0	10	0.138830839510928		0	10	0.138830839510928
0	0	0.35867089554632		0	4	0.218916758403667		0	4	0.218916758403667
1	0	0.327904189102818		1	9	0.428455684629823		1	9	0.428455684629823
1	0	0.356396364793794		0	8	0.0658139761138643		0	8	0.0658139761138643
0	0	-0.156515379457774		0	2	0.16000768338609		0	2	0.16000768338609
0	0	0.420730298119184		0	2	0.12255264701071		0	2	0.12255264701071
0	0	0.0121035479044079		0	2	0.161895501555701		0	2	0.161895501555701
1	0	0.461996085642367		0	2	-0.0273733085539837		0	2	-0.0273733085539837
0	0	-0.0557912900826962		0	4	0.237803884950287		0	4	0.237803884950287
0	0	0.267489806359713		0	2	0.115789302608992		0	2	0.115789302608992
0	0	-0.174076024944433		0	3	0.0372589307262083		0	3	0.0372589307262083
0	0	0.0529272757368966		0	9	0.117813270229545		0	9	0.117813270229545
0	0	0.113848740823066		1	7	0.314302576219016		1	7	0.314302576219016
0	0	0.328553950519891		0	8	0.255567094196803		0	8	0.255567094196803
0	0	-0.0317173691433415		0	2	0.149832282717517		0	2	0.149832282717517
0	0	0.15694566313546		0	3	-0.0413602943398629		0	3	-0.0413602943398629
0	0	0.0631070333890545		0	2	0.264031198663537		0	2	0.264031198663537
0	0	0.156952089640235		0	4	-0.101636159632331		0	4	-0.101636159632331
0	0	0.183481874976398		0	3	0.218479954923921		0	3	0.218479954923921
0	0	0.0303462854169324		0	8	0.11767280147481		0	8	0.11767280147481
0	0	-0.140305053378063		0	5	0.114690927676392		0	5	0.114690927676392
0	0	0.301094370922925		0	5	0.197419623145199		0	5	0.197419623145199
0	0	-0.121755423611315		0	5	0.109297930583279		0	5	0.109297930583279
0	0	0.0945816799401543		0	6	0.175331060960687		0	6	0.175331060960687
0	0	0.425167391770808		0	3	0.0103395280760303		0	3	0.0103395280760303
0	0	0.373425830683444		0	2	-0.0402999076045389		0	2	-0.0402999076045389
0	0	-0.0753838447784046		0	5	0.168572733957955		0	5	0.168572733957955
0	0	0.345819553620473		0	7	0.0916849753579152		0	7	0.0916849753579152
0	0	0.564008528560872		0	14	-0.180834868635076		0	14	-0.180834868635076
0	0	0.205331866900696		0	4	0.344630659583355		0	4	0.344630659583355
0	0	0.33711700542116		0	7	0.118803587515641		0	7	0.118803587515641
0	0	0.0803391564700062		0	6	-0.171074124467776		0	6	-0.171074124467776
1	0	0.0609275586748509		0	16	0.0426229784199405		0	16	0.0426229784199405
0	0	-0.114131451873683		0	3	0.017322382099992		0	3	0.017322382099992
0	0	0.2321866197898		0	18	0.533674537821859		0	18	0.533674537821859
0	0	0.0827426964113153		0	7	0.0105674167904027		0	7	0.0105674167904027
0	0	0.140728413941806		0	6	-0.0244741597253229		0	6	-0.0244741597253229
0	0	0.419586199231683		0	10	0.240887435893261		0	10	0.240887435893261
0	0	4.11931206131497e-05		0	8	0.0523626734842957		0	8	0.0523626734842957
0	0	0.217648338740893		0	4	0.567847830637799		0	4	0.567847830637799
0	0	0.176181170487141		0	17	0.120086320356088		0	17	0.120086320356088
1	0	0.280992144361293		0	16	0.240337554494887		0	16	0.240337554494887
0	0	-0.213380499707717		0	15	0.150318384940976		0	15	0.150318384940976
0	0	0.262723091199631		1	1	0.466851893125982		1	1	0.466851893125982
0	0	0.408023001034267		1	2	0.535778451842579		1	2	0.535778451842579
0	0	0.40165517933149		0	6	0.118923929689204		0	6	0.118923929689204
0	0	0.105112614816481		1	13	0.258502502784037		1	13	0.258502502784037
0	0	0.162017777178941		0	6	0.0976855410300689		0	6	0.0976855410300689
0	0	0.295474515265521		0	16	0.265415099621817		0	16	0.265415099621817
0	0	0.298212219505557		0	16	-0.00224313250842574		0	16	-0.00224313250842574
0	0	0.137207699976598		0	18	0.163981051303874		0	18	0.163981051303874
0	0	0.450474465324169		0	37	0.233950163892636		0	37	0.233950163892636
1	0	0.589268207975619		1	3	0.453577657520287		1	3	0.453577657520287
0	0	-0.0165928136609232		0	6	0.14899413823379		0	6	0.14899413823379
0	0	0.293437542681531		0	14	0.37977386188746		0	14	0.37977386188746
0	0	0.235669245635025		0	8	0.312967272532613		0	8	0.312967272532613
0	0	0.22669416735025		0	7	0.433660590326119		0	7	0.433660590326119
0	0	0.346745810422661		0	5	0.040725630288276		0	5	0.040725630288276
0	0	0.121161473178699		0	6	0.261159167344373		0	6	0.261159167344373
0	0	0.381051745481791		0	5	0.192562487630881		0	5	0.192562487630881
0	0	0.293308289082484		0	5	0.276258152592507		0	5	0.276258152592507
0	0	0.0430735993818326		1	4	0.466860991741016		1	4	0.466860991741016
0	0	0.28262372441435		0	5	0.0496144645763557		0	5	0.0496144645763557
0	0	0.00107752400677658		0	2	0.00365258291144629		0	2	0.00365258291144629
0	0	0.267999912173302		0	15	0.250210760540554		0	15	0.250210760540554
0	0	0.397906869574762		1	1	0.499432996284066		1	1	0.499432996284066
0	0	0.270878588385366		0	9	0.0940533597218402		0	9	0.0940533597218402
0	0	0.146841276893715		0	7	0.154820424099107		0	7	0.154820424099107
0	0	0.14497473039709		0	2	-0.0528803490333019		0	2	-0.0528803490333019
0	0	0.410822762674281		0	7	0.371760615074154		0	7	0.371760615074154
0	0	0.366634673095278		1	6	0.426688083934651		1	6	0.426688083934651
0	0	0.103478175575617		0	10	-0.196070350474825		0	10	-0.196070350474825
0	0	0.330841496500706		0	4	0.1607133183046		0	4	0.1607133183046
0	0	0.380072865225808		1	5	0.471045693579788		1	5	0.471045693579788
0	0	0.165276779250203		1	8	0.458524307847968		1	8	0.458524307847968
0	0	0.177130614468932		0	10	0.156682847955765		0	10	0.156682847955765
0	0	0.0932681916437805		0	8	0.213434059336231		0	8	0.213434059336231
0	0	0.389089736104394		0	3	0.0239014514302189		0	3	0.0239014514302189
0	0	-0.0435621577991147		1	5	0.29839730637091		1	5	0.29839730637091
0	0	0.247159300068502		0	9	-0.047281611073158		0	9	-0.047281611073158
0	0	0.217355450019561		1	7	0.545680641581992		1	7	0.545680641581992
0	0	0.246005168102244		1	4	0.552215109910562		1	4	0.552215109910562
0	0	0.411660098792256		0	6	-0.0306728238557737		0	6	-0.0306728238557737
0	0	0.490491265761208		1	5	0.546394470679437		1	5	0.546394470679437
0	0	0.550706211308681		1	7	0.775441541023867		1	7	0.775441541023867
0	0	0.0512735506931585		1	6	0.322375424482501		1	6	0.322375424482501
0	0	0.299090571250479		0	7	-0.0302138035799683		0	7	-0.0302138035799683
0	0	0.328019306384809		0	3	0.156341194874172		0	3	0.156341194874172
0	0	0.279676885804841		0	2	0.0906589798249409		0	2	0.0906589798249409
0	0	0.334615049331046		0	2	-0.0554805507087961		0	2	-0.0554805507087961
0	0	0.249658529134257		0	7	-0.00982356848239428		0	7	-0.00982356848239428
0	0	0.157323357507075		0	6	0.244600656286977		0	6	0.244600656286977
0	0	0.40798586611334		0	4	0.214481850622762		0	4	0.214481850622762
0	0	0.235301248857316		0	10	0.0832531498581357		0	10	0.0832531498581357
0	0	0.431885660221856		0	9	0.103082526330083		0	9	0.103082526330083
0	0	-0.00346239874261379		0	6	0.18515624983125		0	6	0.18515624983125
0	0	0.0721115825637591		0	4	0.177748011835242		0	4	0.177748011835242
0	0	0.395675175524214		0	3	0.181475720231		0	3	0.181475720231
0	0	-0.142122485286915		0	5	0.14124199795304		0	5	0.14124199795304
0	0	0.327841854790714		0	7	-0.0537544544623891		0	7	-0.0537544544623891
0	0	0.192821055513256		1	10	0.516041946713272		1	10	0.516041946713272
0	0	-0.0395999443792216		0	6	-0.0373792232929149		0	6	-0.0373792232929149
0	0	0.316466142438592		0	3	0.0344575704998281		0	3	0.0344575704998281
0	0	0.219374761344401		0	1	0.105541271099599		0	1	0.105541271099599
0	0	0.166053372389678		0	6	0.00409924829045329		0	6	0.00409924829045329
0	0	0.284399746119644		0	7	0.431571915884332		0	7	0.431571915884332
1	0	0.264365006896686		0	8	0.154202651841413		0	8	0.154202651841413
0	0	0.191908012223469		0	22	0.10789471941216		0	22	0.10789471941216
0	0	0.197757257685632		1	6	0.582788520862807		1	6	0.582788520862807
0	0	0.153525221414231		1	25	0.271994090727854		1	25	0.271994090727854
1	0	0.298361114557554		0	12	0.211552372639524		0	12	0.211552372639524
1	0	0.111395043362943		1	5	0.323427950277108		1	5	0.323427950277108
0	0	0.142634392565433		0	6	0.00191536809331934		0	6	0.00191536809331934
0	0	0.22965538820596		0	9	-0.0714118107102377		0	9	-0.0714118107102377
1	0	0.340470529992116		0	5	-0.0871732709810534		0	5	-0.0871732709810534
0	0	0.460830737285661		0	10	-0.0911420483325186		0	10	-0.0911420483325186
0	0	0.447367829457551		1	12	0.688608528071914		1	12	0.688608528071914
1	0	0.209093582953264		0	8	-0.0175577350013276		0	8	-0.0175577350013276
1	0	0.241146046427161		1	11	0.672269550275002		1	11	0.672269550275002
0	0	0.0416070093550913		1	0	0.287191209329294		1	0	0.287191209329294
0	0	0.0476553955582486		1	15	0.612892450810695		1	15	0.612892450810695
0	0	0.363622324515588		0	4	0.213396629779582		0	4	0.213396629779582
0	0	-0.0402911545278413		0	36	0.152163172992054		0	36	0.152163172992054
0	0	-0.0670286147722315		0	32	0.193055377485931		0	32	0.193055377485931
0	0	0.344015441815415		0	5	0.113298199333784		0	5	0.113298199333784
0	0	0.320827229013102		0	16	0.1098787024151		0	16	0.1098787024151
0	0	0.0391144627436001		0	8	0.0545024388822386		0	8	0.0545024388822386
1	0	0.303022038077951		0	38	0.188470111612332		0	38	0.188470111612332
0	0	0.214082908843936		0	4	-0.0754119705511816		0	4	-0.0754119705511816
1	0	0.544569289000053		0	10	0.00252546944072613		0	10	0.00252546944072613
1	0	0.534150249125239		0	9	0.166440250407468		0	9	0.166440250407468
0	0	0.211097186825595		0	9	0.191557833816783		0	9	0.191557833816783
0	0	0.0659331280524497		0	10	0.0287993757613205		0	10	0.0287993757613205
0	0	0.25367670870568		1	8	0.55872161554816		1	8	0.55872161554816
1	0	0.307708270893094		0	15	0.308087834242102		0	15	0.308087834242102
1	0	0.472293125097059		0	24	-0.0325069369322931		0	24	-0.0325069369322931
0	0	0.205240749195648		1	2	0.299655559114023		1	2	0.299655559114023
0	0	0.324419919168748		0	7	0.0214104524579158		0	7	0.0214104524579158
1	0	0.839696534050472		1	9	0.456757204316316		1	9	0.456757204316316
0	0	0.017029938968503		0	11	0.0518513241337783		0	11	0.0518513241337783
0	0	0.164229490687373		0	6	0.162292307660316		0	6	0.162292307660316
0	0	0.0614792714568288		0	26	0.200715627225735		0	26	0.200715627225735
0	0	0.139155833702613		0	5	-0.030742266688534		0	5	-0.030742266688534
0	0	0.152325479472723		0	7	-0.0794061953366629		0	7	-0.0794061953366629
1	0	0.230348867527189		0	5	-0.110449789412811		0	5	-0.110449789412811
1	0	0.389729067693697		0	4	0.0761557759558232		0	4	0.0761557759558232
0	0	0.287680092589431		0	5	0.0342345131934231		0	5	0.0342345131934231
0	0	0.0361373932988968		0	3	0.179571801932302		0	3	0.179571801932302
0	0	-0.0543546959764278		0	6	0.147582824241798		0	6	0.147582824241798
0	0	0.218436733320645		1	6	0.455326900825742		1	6	0.455326900825742
0	0	0.0130640985601919		1	6	0.540923374413758		1	6	0.540923374413758
0	0	-0.172696437709665		0	6	-0.124996723385655		0	6	-0.124996723385655
0	0	0.416105815262806		0	20	0.196022788473273		0	20	0.196022788473273
0	0	0.153250716415462		0	15	0.135112542797802		0	15	0.135112542797802
1	0	0.556815134528469		0	6	-0.0114177325524854		0	6	-0.0114177325524854
0	0	0.428175033160212		0	5	0.0273975392480174		0	5	0.0273975392480174
0	0	0.315767984181441		0	6	0.197794111433852		0	6	0.197794111433852
0	0	0.173438716441615		0	11	0.170694788056839		0	11	0.170694788056839
1	0	0.308682410477604		1	2	0.269501399463731		1	2	0.269501399463731
0	0	0.214600082761539		0	6	0.173039546943785		0	6	0.173039546943785
0	0	0.19013790577263		1	3	0.287647183395851		1	3	0.287647183395851
0	0	0.0698358417270722		0	3	-0.00838366150840172		0	3	-0.00838366150840172
1	0	0.540826591654484		0	6	0.182027393403132		0	6	0.182027393403132
0	0	0.461830357038737		0	7	-0.0897613808669585		0	7	-0.0897613808669585
1	0	0.469754595282197		0	6	0.122496813321939		0	6	0.122496813321939
0	0	0.305037267622125		0	10	0.00955907716267256		0	10	0.00955907716267256
0	0	0.150394251651448		0	6	0.399015331939565		0	6	0.399015331939565
0	0	0.801605304827345		1	4	0.680428230227285		1	4	0.680428230227285
0	0	0.244162713449456		0	10	0.208286030919055		0	10	0.208286030919055
0	0	0.144815771638548		0	8	0.203338629175146		0	8	0.203338629175146
1	0	0.257001187768122		0	5	0.0392240404524761		0	5	0.0392240404524761
0	0	0.370619880452923		0	9	0.257331019990667		0	9	0.257331019990667
0	0	0.228834441575602		1	5	0.292490754528081		1	5	0.292490754528081
0	0	0.304107090302161		0	6	0.224072556592508		0	6	0.224072556592508
0	0	0.34485676982362		0	8	0.266531868521465		0	8	0.266531868521465
0	0	0.364158680749246		0	7	0.187725017222773		0	7	0.187725017222773
0	0	0.204957299557949		0	4	-0.168783208325058		0	4	-0.168783208325058
0	0	0.383649464160991		0	1	0.0572522540815398		0	1	0.0572522540815398
0	0	0.391149644200633		0	13	0.327855320300081		0	13	0.327855320300081
1	0	0.309440100715952		1	10	0.301212051966083		1	10	0.301212051966083
0	0	0.181898371348883		0	6	0.0816060903649818		0	6	0.0816060903649818
1	0	0.438010562553271		1	7	0.281274421485555		1	7	0.281274421485555
0	0	0.122227430033157		0	8	0.334094393496456		0	8	0.334094393496456
0	0	0.177013853828682		1	5	0.467545663031361		1	5	0.467545663031361
1	0	0.327796332706933		0	6	0.0500248339801852		0	6	0.0500248339801852
0	0	0.220597442816958		0	17	0.234597622672618		0	17	0.234597622672618
0	0	0.203935468204407		1	15	0.129333076253962		1	15	0.129333076253962
0	0	0.336832082943499		0	6	-0.141409443629342		0	6	-0.141409443629342
0	0	0.299675242627684		0	6	0.102802997409185		0	6	0.102802997409185
0	0	-0.0790923921354415		0	4	-0.0430924268376345		0	4	-0.0430924268376345
0	0	0.0434384713545667		1	6	0.552965079540232		1	6	0.552965079540232
0	0	0.257743167605012		0	6	0.24656410103315		0	6	0.24656410103315
0	0	0.162501391908644		0	6	0.249629568805515		0	6	0.249629568805515
0	0	0.241508015153177		1	3	0.519957924511064		1	3	0.519957924511064
0	0	0.434237561938981		0	6	0.00960123438395204		0	6	0.00960123438395204
0	0	0.213990817125129		0	6	0.143520630829487		0	6	0.143520630829487
1	0	0.34575288461293		0	7	0.198382183564213		0	7	0.198382183564213
1	0	0.116691257192478		0	6	0.0682372397463694		0	6	0.0682372397463694
1	0	0.947221030815782		0	7	0.21950499678316		0	7	0.21950499678316
1	0	0.308268427792559		0	6	0.238381049935726		0	6	0.238381049935726
0	0	0.228540826915132		0	4	0.277546744172146		0	4	0.277546744172146
0	0	0.128108271753692		1	1	0.540205753266368		1	1	0.540205753266368
0	0	0.250125845155123		0	6	0.504551328464424		0	6	0.504551328464424
0	0	0.238926587644973		0	4	0.000774585035482557		0	4	0.000774585035482557
0	0	0.368567696688448		0	6	0.120574494494727		0	6	0.120574494494727
0	0	0.51566552215976		1	8	0.215241943369335		1	8	0.215241943369335
0	0	0.0592107846299712		0	6	0.0717113386413566		0	6	0.0717113386413566
0	0	-0.143797186339881		0	8	0.0579007235556703		0	8	0.0579007235556703
0	0	0.135738832332002		0	6	0.330675340570122		0	6	0.330675340570122
0	0	0.34096728808119		0	7	0.132185350657242		0	7	0.132185350657242
1	0	0.543129091673461		1	6	0.423731415525689		1	6	0.423731415525689
0	0	0.215138224674661		1	7	0.484764401965485		1	7	0.484764401965485
0	0	0.598513552670466		0	8	0.076611931667231		0	8	0.076611931667231
0	0	0.0186853129978723		0	6	0.238178256996387		0	6	0.238178256996387
0	0	0.656845306206989		0	6	0.141102979734237		0	6	0.141102979734237
1	0	0.610599264379462		0	6	0.0494344506085661		0	6	0.0494344506085661
1	0	0.636946132412323		0	6	0.678999469469302		0	6	0.678999469469302
0	0	-0.0453171483621938		0	6	0.394079328354138		0	6	0.394079328354138
0	0	-0.0677744569199541		0	6	0.222668735249185		0	6	0.222668735249185
0	0	-0.0363430384453876		0	8	0.271666230619891		0	8	0.271666230619891
0	0	0.184398929812988		1	2	0.400471604932728		1	2	0.400471604932728
0	0	0.310463459236364		0	6	-0.0679139918882696		0	6	-0.0679139918882696
0	0	0.0692811399797548		0	7	0.00822525438789841		0	7	0.00822525438789841
0	0	0.305820207587126		1	4	0.395441232911618		1	4	0.395441232911618
0	0	0.285732024599466		0	1	0.58630763802747		0	1	0.58630763802747
0	0	0.333468929546404		0	4	0.361500568890441		0	4	0.361500568890441
0	0	-0.0964526483723405		0	6	0.0599821022711818		0	6	0.0599821022711818
0	0	0.13372976668551		0	7	0.228566823699219		0	7	0.228566823699219
0	0	0.641888382735482		0	37	0.0396321128230941		0	37	0.0396321128230941
0	0	0.0742090079137697		0	8	0.274679174065991		0	8	0.274679174065991
0	0	-0.0328383932477133		0	8	0.254000533395822		0	8	0.254000533395822
0	0	0.0251356523652312		0	6	0.0821648774507619		0	6	0.0821648774507619
0	0	0.365100455703506		0	5	0.145993205603213		0	5	0.145993205603213
0	0	0.10071534456382		0	4	0.109542756615293		0	4	0.109542756615293
0	0	0.21348652146028		0	24	0.113989834986524		0	24	0.113989834986524
0	0	0.090830202525623		0	7	0.250972651013413		0	7	0.250972651013413
0	0	-0.0533177686091582		0	0	0.174743377832515		0	0	0.174743377832515
0	0	0.188666363896627		0	17	0.186801970929001		0	17	0.186801970929001
0	0	0.190542069417946		0	7	0.145430618520582		0	7	0.145430618520582
0	0	0.12246295855239		1	6	0.331671107135274		1	6	0.331671107135274
0	0	0.150048111215293		0	3	0.174904742023837		0	3	0.174904742023837
0	0	0.0236868827619742		1	3	0.245617868382249		1	3	0.245617868382249
0	0	0.326945619361913		1	2	0.221601116945905		1	2	0.221601116945905
0	0	0.235497543547412		0	8	0.0471191861561268		0	8	0.0471191861561268
0	0	0.187148319049682		0	6	0.190666002951157		0	6	0.190666002951157
0	0	0.264548905429472		0	8	0.11024554988852		0	8	0.11024554988852
0	0	-0.0724636588438105		0	15	0.294625231611975		0	15	0.294625231611975
0	0	0.213521799050065		0	17	0.279432039915085		0	17	0.279432039915085
0	0	0.00619895987387057		0	35	-0.1323594857387		0	35	-0.1323594857387
0	0	0.0577447626910194		0	7	0.355009896371659		0	7	0.355009896371659
0	0	0.233144906511058		0	6	0.281060173308859		0	6	0.281060173308859
0	0	0.240349720713383		0	7	0.179643100883362		0	7	0.179643100883362
0	0	0.266415162655956		0	8	-0.164530543208498		0	8	-0.164530543208498
0	0	-0.0237697740894928		0	6	0.229959192298057		0	6	0.229959192298057
0	0	-0.0139035338409725		0	5	0.136875740152052		0	5	0.136875740152052
0	0	0.0501260641586807		0	7	0.117735869279915		0	7	0.117735869279915
0	0	0.169393668638623		0	6	-0.0431210207091724		0	6	-0.0431210207091724
0	0	-0.0648457654634368		0	6	0.0796557850181804		0	6	0.0796557850181804
0	0	0.189254811226441		1	1	0.745909627422743		1	1	0.745909627422743
0	0	-0.0799316001897543		0	2	0.162412990778099		0	2	0.162412990778099
0	0	0.30679214618164		0	7	0.180796428229761		0	7	0.180796428229761
0	0	0.106021633195375		0	7	0.284444581925047		0	7	0.284444581925047
0	0	0.393820900114386		0	7	0.0683715892747597		0	7	0.0683715892747597
0	0	0.162155683359386		0	6	-0.00914836510030366		0	6	-0.00914836510030366
0	0	0.333318257161752		0	1	0.379929674639426		0	1	0.379929674639426
0	0	0.306856452918205		0	15	0.144227453600681		0	15	0.144227453600681
0	0	0.18751913869746		1	6	0.549045235462959		1	6	0.549045235462959
0	0	0.183851280970921		0	6	0.217598817763721		0	6	0.217598817763721
0	0	0.110201701518508		0	6	0.153761168879569		0	6	0.153761168879569
0	0	0.0968304303748573		0	5	0.157861487765519		0	5	0.157861487765519
0	0	0.100193934796036		0	3	0.314823755909456		0	3	0.314823755909456
0	0	0.305578568001503		0	7	0.0368019787298569		0	7	0.0368019787298569
0	0	0.0452207462840119		0	6	-0.0628764629675543		0	6	-0.0628764629675543
0	0	0.60565470112562		0	6	0.251482669611074		0	6	0.251482669611074
0	0	0.104084621643488		0	8	0.208575485732399		0	8	0.208575485732399
0	0	0.288349184855557		0	3	0.167195388244827		0	3	0.167195388244827
0	0	0.199557775056149		0	6	0.253187752261113		0	6	0.253187752261113
0	0	0.223816886854726		0	4	0.108739502839884		0	4	0.108739502839884
1	0	0.401738971206946		1	6	0.464739306919711		1	6	0.464739306919711
0	0	0.212634642405025		0	7	0.417880720159045		0	7	0.417880720159045
0	0	0.023697861784427		1	4	0.825691179425031		1	4	0.825691179425031
0	0	0.284245894002658		0	4	0.109261847908248		0	4	0.109261847908248
0	0	0.293833623412747		0	23	0.153418744587639		0	23	0.153418744587639
0	0	0.206961840033361		0	2	0.126345051952475		0	2	0.126345051952475
0	0	0.349124709372096		0	5	0.238758721800284		0	5	0.238758721800284
0	0	0.231209052009111		0	8	0.227774680596844		0	8	0.227774680596844
1	0	0.381270558493769		0	6	0.190983282829307		0	6	0.190983282829307
0	0	0.185019887085687		0	6	0.0390052409330192		0	6	0.0390052409330192
0	0	-0.0529214793290461		0	6	0.216807507297783		0	6	0.216807507297783
0	0	0.129809315992791		1	6	0.323274272542744		1	6	0.323274272542744
0	0	0.056823505937143		0	8	0.41072540356076		0	8	0.41072540356076
0	0	0.0755565527994775		0	6	-0.00994930325772241		0	6	-0.00994930325772241
0	0	0.0946783045567089		0	10	0.273118429159037		0	10	0.273118429159037
0	0	0.368781185014446		0	5	0.226521683429498		0	5	0.226521683429498
0	0	0.0332442996020366		0	4	0.106892258344571		0	4	0.106892258344571
0	0	0.211657131855256		0	11	0.0986222195702934		0	11	0.0986222195702934
0	0	0.0269035616600784		0	7	0.263798922460373		0	7	0.263798922460373
0	0	0.343648149137268		0	9	0.148288127580668		0	9	0.148288127580668
0	0	-0.0491760200002785		0	3	0.0594880447505809		0	3	0.0594880447505809
0	0	0.208515692868621		0	7	0.406662036544165		0	7	0.406662036544165
0	0	0.195834919772849		0	3	0.122408571298396		0	3	0.122408571298396
0	0	0.194445696553896		0	8	0.415495314801521		0	8	0.415495314801521
0	0	0.382230615166999		0	7	0.0142151656632526		0	7	0.0142151656632526
0	0	0.113320299759286		0	3	0.0420405820712026		0	3	0.0420405820712026
0	0	0.40994918833728		0	22	0.180469284715971		0	22	0.180469284715971
0	0	0.458895855015544		0	6	0.376071356811677		0	6	0.376071356811677
0	0	-0.00559462105438986		0	6	0.327159754430514		0	6	0.327159754430514
0	0	-0.247550381582781		0	3	0.334975920670951		0	3	0.334975920670951
0	0	0.120521908199871		1	6	0.386894550338548		1	6	0.386894550338548
0	0	0.156647956169995		0	8	0.0813012987729523		0	8	0.0813012987729523
0	0	0.019673415013642		0	8	-0.0127605414165532		0	8	-0.0127605414165532
0	0	0.33751002611787		0	7	0.235773229755639		0	7	0.235773229755639
0	0	0.215542531071497		0	6	0.339703867687089		0	6	0.339703867687089
0	0	0.194533146947336		0	23	0.204112877997756		0	23	0.204112877997756
0	0	0.377681145737512		0	6	0.00988864090331672		0	6	0.00988864090331672
0	0	0.137697692076153		1	3	0.323181912243564		1	3	0.323181912243564
0	0	0.291658177815276		0	6	0.0420532243461517		0	6	0.0420532243461517
0	0	0.112096587673552		1	13	0.442560095597397		1	13	0.442560095597397
0	0	0.142166332448834		0	4	0.103443791000563		0	4	0.103443791000563
0	0	0.236917309748157		1	6	0.496767580248411		1	6	0.496767580248411
1	0	0.291254168871659		0	7	-0.0343342908596131		0	7	-0.0343342908596131
1	0	0.369656171241378		1	5	0.383808168926062		1	5	0.383808168926062
0	0	0.116440102147945		1	7	0.436544317528942		1	7	0.436544317528942
0	0	0.196780886761158		0	4	-0.0207082771389153		0	4	-0.0207082771389153
0	0	0.0908174526019331		0	11	0.17291300184217		0	11	0.17291300184217
0	0	0.297360608857049		0	6	0.206396475414847		0	6	0.206396475414847
0	0	0.337787038583218		0	6	0.0535132559571016		0	6	0.0535132559571016
0	0	0.560865767988427		0	6	0.0539761919485108		0	6	0.0539761919485108
0	0	0.216942052935163		1	6	0.59808140273301		1	6	0.59808140273301
0	0	0.170126288679459		0	6	0.0838979373203643		0	6	0.0838979373203643
0	0	0.0219982101582621		0	7	0.164605974700314		0	7	0.164605974700314
0	0	0.0748760305499694		0	3	0.402525173522546		0	3	0.402525173522546
0	0	-0.0080785982355231		1	7	0.337813480183115		1	7	0.337813480183115
0	0	0.000410467742570418		0	6	0.0771667554533229		0	6	0.0771667554533229
1	0	0.531014553261604		0	7	0.0189241889183789		0	7	0.0189241889183789
0	0	0.0438292149785651		0	6	-0.103867101227389		0	6	-0.103867101227389
0	0	0.20332160014391		0	4	-0.0247129647503704		0	4	-0.0247129647503704
0	0	0.282061756603308		0	2	0.00287815427186327		0	2	0.00287815427186327
0	0	0.214413714050095		0	7	0.183090878103335		0	7	0.183090878103335
0	0	0.238380401344834		0	5	-0.0175005366521547		0	5	-0.0175005366521547
0	0	0.146082568017698		0	3	0.186783098769308		0	3	0.186783098769308
0	0	0.12791750224113		0	6	0.172316757024078		0	6	0.172316757024078
0	0	0.255406465542648		0	7	-0.0524488459619068		0	7	-0.0524488459619068
1	0	0.429685407518816		0	6	0.0365302016880464		0	6	0.0365302016880464
0	0	0.128123449961646		1	11	0.390560968333249		1	11	0.390560968333249
0	0	0.126435737232656		0	6	0.377990576131916		0	6	0.377990576131916
0	0	0.228613878977929		0	6	0.266065327627543		0	6	0.266065327627543
0	0	0.125126614932001		0	13	0.226758000230788		0	13	0.226758000230788
0	0	0.147224503107693		0	29	0.342438654566648		0	29	0.342438654566648
0	0	0.325509724159945		0	4	0.00865112662296484		0	4	0.00865112662296484
0	0	0.385726627648532		0	5	0.231038100178504		0	5	0.231038100178504
0	0	-0.0428843126457633		0	9	0.151169251466716		0	9	0.151169251466716
1	0	0.2197515157808		0	6	0.299798133137399		0	6	0.299798133137399
0	0	0.212804793711214		0	4	-0.0523442367952475		0	4	-0.0523442367952475
0	0	0.126632269542733		1	6	0.430688556780897		1	6	0.430688556780897
0	0	0.221950164609173		0	7	0.134019578153622		0	7	0.134019578153622
0	0	-0.00770509924913518		0	6	0.173892536561035		0	6	0.173892536561035
0	0	-0.135030238183181		0	3	0.286789961057241		0	3	0.286789961057241
0	0	0.136266744250802		1	6	0.308784783848418		1	6	0.308784783848418
0	0	0.0220607129703649		0	8	0.234456972486861		0	8	0.234456972486861
0	0	0.0599956991679174		0	3	0.207566445237138		0	3	0.207566445237138
0	0	0.00549343037090528		0	14	0.368220260504802		0	14	0.368220260504802
0	0	0.0317949804538649		0	2	0.0927116691047434		0	2	0.0927116691047434
0	0	0.235143329427248		1	5	0.612904372466689		1	5	0.612904372466689
0	0	0.147262114114171		0	5	0.232569971737755		0	5	0.232569971737755
0	0	0.197244004525688		0	6	0.259775833824835		0	6	0.259775833824835
0	0	0.126602085170401		0	2	-0.102052028014876		0	2	-0.102052028014876
0	0	0.115706834472861		0	7	-0.0531234724920563		0	7	-0.0531234724920563
0	0	-0.103052204540476		0	6	0.0565391918356561		0	6	0.0565391918356561
0	0	0.0632328958052808		0	6	0.0723741440498957		0	6	0.0723741440498957
0	0	0.0951718819463776		0	7	0.156394840086683		0	7	0.156394840086683
0	0	0.26181395203807		0	7	0.0988993376681811		0	7	0.0988993376681811
0	0	0.00320807882096159		0	8	0.337376254264621		0	8	0.337376254264621
1	0	0.121277603451756		0	6	0.138332958463638		0	6	0.138332958463638
0	0	0.0605603150061029		0	35	0.122393233507193		0	35	0.122393233507193
0	0	0.330538103616266		1	7	0.311567418045241		1	7	0.311567418045241
0	0	0.157637841065421		0	6	0.336604393213207		0	6	0.336604393213207
0	0	0.164091244570218		0	7	0.0222178992197269		0	7	0.0222178992197269
0	0	0.118562154441445		0	4	0.089355693066495		0	4	0.089355693066495
0	0	0.0674222671773482		1	6	0.290672964359395		1	6	0.290672964359395
0	0	-0.0615589602360429		0	5	0.18466952257833		0	5	0.18466952257833
0	0	0.0639299687916829		0	5	0.314643758889962		0	5	0.314643758889962
0	0	0.0187030769966628		0	6	0.255497680294335		0	6	0.255497680294335
0	0	0.159978075433928		1	2	0.377710001282142		1	2	0.377710001282142
0	0	0.509374890208006		0	8	0.153488776946997		0	8	0.153488776946997
0	0	0.145899324399501		0	3	-0.018566397417538		0	3	-0.018566397417538
0	0	0.196501451031513		0	6	0.220048905832013		0	6	0.220048905832013
0	0	0.223281622980326		0	6	0.0834708136504145		0	6	0.0834708136504145
0	0	0.00599676348231701		0	3	-0.112005306858043		0	3	-0.112005306858043
1	0	0.28746933298112		0	6	-0.0420217257657522		0	6	-0.0420217257657522
0	0	0.21056346733594		0	9	0.167869776913987		0	9	0.167869776913987
0	0	0.0118944005008175		1	7	0.190616852570072		1	7	0.190616852570072
1	0	0.48582207616169		0	10	0.0942628716779075		0	10	0.0942628716779075
0	0	0.0180870185383475		0	4	0.217388390350398		0	4	0.217388390350398
0	0	0.00756412110860606		0	6	0.209197141101156		0	6	0.209197141101156
0	0	0.205374800898119		0	6	0.215962539556447		0	6	0.215962539556447
1	0	0.505007740439085		0	9	-0.0346908924362453		0	9	-0.0346908924362453
0	0	0.499472098852609		0	7	0.211231491325098		0	7	0.211231491325098
1	0	0.23213037915509		0	5	0.0579776255618456		0	5	0.0579776255618456
0	0	0.14146918298715		0	9	0.334345889023841		0	9	0.334345889023841
0	0	0.503764096643189		1	1	0.268122825853762		1	1	0.268122825853762
0	0	0.235725243803161		0	5	0.0207556224780041		0	5	0.0207556224780041
0	0	0.394381563913311		1	7	0.357686077549083		1	7	0.357686077549083
0	0	0.0882415513278813		0	9	0.23665058713094		0	9	0.23665058713094
0	0	0.119225402136039		1	0	0.72641261950052		1	0	0.72641261950052
0	0	0.108002534103148		0	2	0.245932707610168		0	2	0.245932707610168
0	0	0.130936321648235		1	7	0.195885026838466		1	7	0.195885026838466
0	0	0.21219673436653		0	10	0.0888793823126776		0	10	0.0888793823126776
0	0	0.247208128553947		0	6	0.178307571283288		0	6	0.178307571283288
0	0	-0.0024536643612373		0	6	0.302078765150513		0	6	0.302078765150513
0	0	-0.0252193136605247		0	5	0.0846607358762476		0	5	0.0846607358762476
0	0	0.244488037276679		1	9	0.376634116026485		1	9	0.376634116026485
0	0	-0.115727318867982		1	6	0.385966597628644		1	6	0.385966597628644
0	0	0.0692104971117322		0	9	0.0376527305241511		0	9	0.0376527305241511
0	0	0.327875745953785		1	1	0.5857573370844		1	1	0.5857573370844
0	0	-0.0419096529816948		1	4	0.374847567812955		1	4	0.374847567812955
0	0	0.112705497971377		0	5	0.237616352856095		0	5	0.237616352856095
0	0	0.197930080233672		0	11	0.252686706823059		0	11	0.252686706823059
0	0	0.124476172413888		0	1	0.231690632689233		0	1	0.231690632689233
0	0	0.0645754717875548		0	18	0.141911331303819		0	18	0.141911331303819
0	0	0.136247087218034		0	2	0.255556261610913		0	2	0.255556261610913
1	0	0.620074137056938		1	2	0.480384190666295		1	2	0.480384190666295
0	0	0.150727941028083		0	7	0.130703073248814		0	7	0.130703073248814
1	0	0.230226036385839		0	10	0.141410977772917		0	10	0.141410977772917
0	0	0.358899631488282		0	8	0.308815254046577		0	8	0.308815254046577
0	0	0.196699197421553		0	18	0.0631869770912504		0	18	0.0631869770912504
1	0	0.296497175025088		0	7	0.132657934151824		0	7	0.132657934151824
0	0	0.305902075084983		1	13	0.235642537095287		1	13	0.235642537095287
0	0	0.0465058105527764		1	6	0.640313918178464		1	6	0.640313918178464
0	0	0.154987923791476		0	3	0.360631856341208		0	3	0.360631856341208
0	0	0.330662414201525		0	6	0.077410813623064		0	6	0.077410813623064
0	0	0.204495651916992		0	1	0.0867213311802992		0	1	0.0867213311802992
0	0	0.21383822104736		0	11	0.0670829512464088		0	11	0.0670829512464088
1	0	0.344402084721581		0	8	0.136130932065626		0	8	0.136130932065626
0	0	0.361373785315518		0	6	-0.0503043703396077		0	6	-0.0503043703396077
0	0	0.0993148684586272		0	9	0.0536786079566732		0	9	0.0536786079566732
1	0	0.379664036186278		0	11	0.25279615303158		0	11	0.25279615303158
0	0	0.246683661203232		1	8	0.276624309530203		1	8	0.276624309530203
0	0	0.0924879666643413		0	13	0.051903538275481		0	13	0.051903538275481
0	0	0.302101549378042		0	9	0.166194351101609		0	9	0.166194351101609
0	0	0.193476898720479		0	3	0.110846859383154		0	3	0.110846859383154
0	0	0.173023345818856		1	11	0.566053244235721		1	11	0.566053244235721
0	0	0.0843687332912263		0	3	0.10440373340449		0	3	0.10440373340449
1	0	0.212831938722147		0	8	0.0330722736476818		0	8	0.0330722736476818
0	0	0.216997583251072		0	3	0.415985960850936		0	3	0.415985960850936
0	0	0.0262715743761326		0	7	0.240712982192341		0	7	0.240712982192341
1	0	0.353267516010105		1	8	0.115307500103814		1	8	0.115307500103814
0	0	0.142859060641201		1	2	0.840281021873896		1	2	0.840281021873896
0	0	0.261971563611658		0	9	-0.173060723987242		0	9	-0.173060723987242
0	0	0.263117994690571		0	9	-0.123400941023219		0	9	-0.123400941023219
0	0	0.0402588019776325		0	10	0.290110588539371		0	10	0.290110588539371
0	0	0.0179915077609473		0	11	0.207397499585306		0	11	0.207397499585306
1	0	0.212927677116113		1	3	0.694361418186461		1	3	0.694361418186461
0	0	0.36999167652912		0	1	0.284058935543005		0	1	0.284058935543005
0	0	0.16228948584758		0	11	0.129107320902266		0	11	0.129107320902266
0	0	0.777564834825614		0	6	0.277724220359747		0	6	0.277724220359747
0	0	0.234248641652327		0	2	0.199160974004632		0	2	0.199160974004632
1	0	0.288819553327516		0	3	0.306034452002992		0	3	0.306034452002992
0	0	-0.0366026754665828		0	3	0.231207151879561		0	3	0.231207151879561
0	0	0.297629425295242		0	4	0.00498655667053657		0	4	0.00498655667053657
0	0	0.39501717149213		0	9	0.00272083531001011		0	9	0.00272083531001011
1	0	0.30576356740722		0	9	0.129736032344016		0	9	0.129736032344016
0	0	0.150373498785689		0	7	0.10898385496143		0	7	0.10898385496143
0	0	0.210139787596706		0	8	0.127502288074262		0	8	0.127502288074262
0	0	0.220748837414373		0	1	0.0875714825416149		0	1	0.0875714825416149
0	0	0.35444097121425		1	9	0.420333560210069		1	9	0.420333560210069
0	0	0.134435675313097		1	5	0.633278475425512		1	5	0.633278475425512
0	0	0.288806873835694		0	13	0.0432549025696129		0	13	0.0432549025696129
0	0	0.425706848224017		1	1	0.558094114794474		1	1	0.558094114794474
0	0	0.161416454491794		0	8	0.0484029453730233		0	8	0.0484029453730233
1	0	0.224716993581938		0	7	0.0435039468290218		0	7	0.0435039468290218
1	0	0.377252327528278		0	5	0.0564622347609412		0	5	0.0564622347609412
0	0	0.0963520338244382		0	2	0.183465758538496		0	2	0.183465758538496
0	0	0.260985162927868		0	5	0.193412958074876		0	5	0.193412958074876
0	0	0.194537330140994		0	9	0.161553097891647		0	9	0.161553097891647
0	0	-0.0594569747918881		0	5	-0.0713156415649442		0	5	-0.0713156415649442
0	0	0.204108038775791		0	6	0.0582238141015667		0	6	0.0582238141015667
0	0	0.282398997453362		0	3	-0.0231709588873846		0	3	-0.0231709588873846
0	0	0.0480315538583912		0	7	-0.268461661415316		0	7	-0.268461661415316
0	0	0.136440002841748		0	5	0.158609562642266		0	5	0.158609562642266
0	0	0.0691536439361045		0	1	0.206110273507428		0	1	0.206110273507428
0	0	-0.00294575733024181		1	7	0.357215697267651		1	7	0.357215697267651
0	0	0.231907346694428		0	1	-0.0672222604701089		0	1	-0.0672222604701089
0	0	0.453489364027179		0	6	0.476239328362185		0	6	0.476239328362185
0	0	0.257160765829893		0	9	0.209341313871219		0	9	0.209341313871219
0	0	0.0322230024713375		0	6	0.000189743136535744		0	6	0.000189743136535744
0	0	0.315682996523814		0	4	0.12788061683704		0	4	0.12788061683704
0	0	0.382108003220742		0	8	-0.24721397745741		0	8	-0.24721397745741
0	0	0.154220631216322		0	6	0.121478433392019		0	6	0.121478433392019
1	0	0.502287307801393		0	6	0.414003833929464		0	6	0.414003833929464
0	0	0.0450188250988659		0	6	0.295811362935099		0	6	0.295811362935099
0	0	0.211567550630828		0	1	0.287700525292352		0	1	0.287700525292352
0	0	0.0993176611972148		0	9	0.0140523885553412		0	9	0.0140523885553412
0	0	0.385667266561789		0	6	0.0805876843551268		0	6	0.0805876843551268
1	0	0.187386045396664		0	8	0.351797721495538		0	8	0.351797721495538
1	0	0.187677656040293		1	6	0.50949356213774		1	6	0.50949356213774
0	0	0.193960074695428		0	6	0.199294328110601		0	6	0.199294328110601
0	0	0.266578471030471		0	9	-0.0898323887483166		0	9	-0.0898323887483166
1	0	0.445130997018066		1	1	0.679575332166208		1	1	0.679575332166208
0	0	0.402024377425728		0	2	0.0677571247879103		0	2	0.0677571247879103
0	0	0.202282860122038		1	4	0.294158078707301		1	4	0.294158078707301
0	0	0.212107821200669		0	2	0.0314979814266848		0	2	0.0314979814266848
1	0	0.276439595001084		1	13	0.298838543409118		1	13	0.298838543409118
0	0	0.229776875054102		1	6	0.467457464322425		1	6	0.467457464322425
0	0	0.316768294279521		0	12	0.423522139410886		0	12	0.423522139410886
1	0	0.671902300287388		0	8	0.138102439187527		0	8	0.138102439187527
0	0	0.0428114337965234		0	9	0.0161738445693648		0	9	0.0161738445693648
0	0	0.17132720946648		0	2	-0.0492184875828695		0	2	-0.0492184875828695
0	0	0.146517956340571		0	3	0.0516366341470217		0	3	0.0516366341470217
0	0	0.24139692784486		0	2	0.214764206845694		0	2	0.214764206845694
0	0	0.360122137452162		0	35	0.109522031453902		0	35	0.109522031453902
1	0	0.391912968317984		1	12	0.823982542892849		1	12	0.823982542892849
0	0	0.0780628675496584		0	9	0.13117938306134		0	9	0.13117938306134
0	0	0.0814036410171815		0	14	-0.0468441661017475		0	14	-0.0468441661017475
0	0	-0.139696375160485		0	7	0.263553450560431		0	7	0.263553450560431
1	0	0.295185000684501		0	2	0.321403926171516		0	2	0.321403926171516
0	0	0.127275279382187		1	3	0.684204153864898		1	3	0.684204153864898
0	0	-0.0133210659138338		0	4	0.0644495604931188		0	4	0.0644495604931188
0	0	0.0352200035918686		0	6	0.00869999849223372		0	6	0.00869999849223372
1	0	0.266017574154948		0	5	0.324782781099611		0	5	0.324782781099611
0	0	0.612194859673231		0	2	-0.028008336347513		0	2	-0.028008336347513
0	0	0.541732870676303		0	3	0.108624405167181		0	3	0.108624405167181
0	0	-0.0199380089317493		0	7	0.265491361179094		0	7	0.265491361179094
0	0	0.00552463935117354		0	7	0.275250015871193		0	7	0.275250015871193
0	0	0.071642374605205		0	14	0.31275842952517		0	14	0.31275842952517
1	0	0.0463868621846484		1	6	0.349552423455242		1	6	0.349552423455242
0	0	-0.0434208548533907		0	6	0.246125692074643		0	6	0.246125692074643
0	0	-0.0162891713289295		0	10	0.148029277076804		0	10	0.148029277076804
0	0	0.0412141742177888		0	7	0.159664580544253		0	7	0.159664580544253
1	0	0.502455210256508		1	8	0.364964963423884		1	8	0.364964963423884
1	0	0.356892671871789		0	3	0.286375915922037		0	3	0.286375915922037
0	0	-0.00251611862451325		0	6	0.089025799624855		0	6	0.089025799624855
1	0	0.430270160818863		0	7	-0.0440986345625772		0	7	-0.0440986345625772
1	0	0.434296068985663		0	2	0.173314986990881		0	2	0.173314986990881
0	0	0.262311139778168		0	7	-0.134595574242844		0	7	-0.134595574242844
0	0	0.183199804962957		1	3	0.458211532945327		1	3	0.458211532945327
0	0	0.17975064583034		1	4	0.360453674803678		1	4	0.360453674803678
0	0	0.636625222801454		1	9	0.480627161763133		1	9	0.480627161763133
0	0	0.130305706527719
0	0	0.428539673110496
0	0	0.244788393985571
0	0	0.153346134639585
0	0	0.296084524977464
0	0	0.168998629334083
1	0	0.787279568383018
0	0	0.0938222001662214
0	0	0.213238157187384
1	0	0.431748032457711
0	0	0.0116534719138614
1	0	0.213787198979452
0	0	0.298650711886796
0	0	0.300584947056498
0	0	0.145027119066632
0	0	0.208555580132639
0	0	0.128745390265971
0	0	0.196235858707837
0	0	0.19956074082255
0	0	0.175059483548015
0	0	0.166206970007211
0	0	0.282550496677296
0	0	0.261958055609752
0	0	0.0079283506782978
0	0	0.0404060987940834
0	0	0.265637011053019
0	0	0.182276840175715
0	0	0.0800393066066961
0	0	0.046947342117974
0	0	0.219976498204095
1	0	0.700595955833932
0	0	0.13164516069196
0	0	0.342930363299142
0	0	0.121541706997574
1	0	0.263586330817095
0	0	0.174905870931844
1	0	0.912203981166741
0	0	0.418249461903669
0	0	0.2667128356338
0	0	0.200829387081384
0	0	0.293047080692755
0	0	0.170237759921541
0	0	0.318757369985193
1	0	0.474791596970623
0	0	0.29362385409419
1	0	0.661986481856824
0	0	0.588376502417683
1	0	0.192212588442352
0	0	-0.0321469039836083
0	0	0.320963799204176
0	0	0.145822738154089
0	0	0.248093831560261
0	0	0.163804738590217
0	0	0.497511909395459
0	0	-0.0187031574168795
0	0	0.29493885987256
1	0	0.308697319319223
1	0	0.247480827970861
0	0	0.296318708570837
1	0	0.243729926682063
0	0	0.164276017281825
0	0	0.240429140977219
0	0	0.437205972485805
0	0	0.23697966822655
1	0	0.241996233374389
1	0	0.338450405916429
0	0	0.399127335875318
0	0	0.671876924484272
0	0	-0.0650992922586231
0	0	0.322240104912416
0	0	0.0356985368204282
1	0	0.632225354935395
1	0	0.190896323788298
0	0	0.120023274702231
0	0	0.241312914438922
0	0	0.245897451352583
0	0	0.382589874855184
0	0	0.411919207349024
0	0	0.0847738920413102
0	0	0.152479083518975
0	0	0.285167930246179
0	0	0.0746766818396149
0	0	0.0387951006458445
1	0	0.23204646591853
0	0	0.184945444992296
0	0	0.265914861009467
1	0	0.465679043882383
1	0	0.358983223262835
0	0	0.350315647425425
0	0	0.220141813677938
0	0	0.772793544344808
0	0	0.306416307554491
1	0	0.313559445861093
1	0	0.266282137527943
1	0	0.334161512309763
0	0	0.0405555970820704
0	0	0.371546957631131
0	0	0.15385484841861
0	0	0.245304516115393
0	0	0.268008471158693
0	0	0.228264846512822
0	0	0.164779186953617
1	0	0.575862507906177
1	0	0.486258803907274
0	0	0.376903798174489
0	0	0.129998763154582
0	0	0.209939121268669
0	0	0.335284584536339
0	0	0.27593851179265
0	0	0.227605599533494
0	0	0.239521114840886
0	0	0.104500366169884
0	0	0.17697671082399
0	0	0.368650052648058
0	0	0.0659411657174366
0	0	0.0479549846498011
1	0	0.352149315997802
1	0	0.42895985832874
0	0	0.308579543407441
1	0	0.706936606842763
0	0	0.0434399322845249
0	0	0.00632657220178614
1	0	0.270755038404846
0	0	0.257393618091733
0	0	0.16804900026619
0	0	0.230681956644903
0	0	0.193824896830212
1	0	0.478714374315178
0	0	0.211531513931893
0	0	0.517142019253385
0	0	0.258914534438057
1	0	0.200017105869669
0	0	0.420136955707832
0	0	-0.140494599202062
0	0	0.624605119078935
1	0	0.466655284335856
1	0	0.510291992541037
1	0	0.536883581183985
1	0	0.362246442105229
0	0	0.243407848087965
0	0	0.402462509302738
0	0	-0.0212367998233238
0	0	0.24040191213542
0	0	0.42073158075496
0	0	0.0891694309595177
0	0	-0.0340535623418384
0	0	0.272108326569265
1	0	0.639846395878116
1	0	0.696568496806028
0	0	-0.0100589025470523
0	0	-0.112004682151958
1	0	0.304391900447967
0	0	0.169744439190369
0	0	0.0632654761686246
1	0	0.408672464587791
0	0	0.141131441218118
1	0	0.299677723543054
1	0	1.09132584262857
1	0	0.287125777175352
0	0	0.568863963393426
1	0	0.240041994404816
0	0	0.127348823380733
0	0	0.159514964254065
0	0	0.261637768943266
0	0	0.195050827417966
0	0	0.265452760596864
0	0	0.0392432895919409
0	0	0.163139825746301
0	0	0.0311445360473759
1	0	0.453777263250528
1	0	0.718714337619159
0	0	-0.0821246261384573
0	0	0.237160209901979
0	0	0.388705513805863
0	0	0.141753570438751
1	0	0.29002697624077
0	0	0.161170036509684
0	0	0.294479503925417
0	0	0.433159272501794
1	0	0.378875704288561
1	0	0.503839054230949
0	0	0.28060377929383
0	0	0.106920033631344
1	0	0.206096886516265
0	0	0.211530351085528
0	0	0.23831590094885
1	0	0.463134934599048
1	0	0.305519086183711
0	0	0.218058608863611
0	0	0.404764706169932
0	0	-0.072302589850526
0	0	0.35683447679031
0	0	0.237519699783523
0	0	0.243033276709987
1	0	0.224670633372743
0	0	0.0487739359314574
0	0	0.153564410700753
0	0	0.434223889538554
0	0	0.219018436736668
0	0	0.0971994399204269
0	0	0.027029518199746
0	0	0.180566136384994
0	0	0.376763732108929
0	0	0.0146889437313162
0	0	0.221967589534348
0	0	0.109365179933434
1	0	0.00988981767247321
0	0	0.0694209000396869
0	0	0.0132566044313785
0	0	0.269653525877836
1	0	0.520148298035653
0	0	0.086958641728564
0	0	0.181864760735315
0	0	0.239952386046693
0	0	-0.137493112111875
0	0	-0.0334552447962315
1	0	0.517365078616421
1	0	0.517342871873189
0	0	-0.0222062950849717
0	0	0.0720643072735152
1	0	0.244013206116293
0	0	0.39213739164679
0	0	0.00982670637327155
0	0	-0.0197982070575196
0	0	0.2371585036815
0	0	0.308922971534549
0	0	0.133243100841745
0	0	0.167893024367042
0	0	0.0469875364335382
0	0	0.0282862804645367
0	0	0.0666213200226311
0	0	0.248623587075908
1	0	0.223863849227426
0	0	0.129049812160604
0	0	0.181359008573872
0	0	0.197772207035516
0	0	0.184985935946216
0	0	0.247299113960402
0	0	0.101762163186764
0	0	0.148744831220105
1	0	0.344154156970337
0	0	0.0415447841006077
0	0	0.22062125379043
1	0	0.681960625845315
0	0	-0.00684650017740285
0	0	0.263636345109715
0	0	0.191297422741219
0	0	0.0531413421585879
0	0	0.16606781090335
0	0	0.258947956748852
0	0	0.391724789272972
1	0	0.481282541990271
1	0	0.589960054639162
0	0	0.149632178161654
1	0	0.482649364696455
0	0	0.0630467736123771
0	0	0.221613974059931
0	0	0.00154716408369567
0	0	0.175724629738887
0	0	0.13784618664699
0	0	0.331754858943713
0	0	0.283253348559131
0	0	-0.0203435979742683
0	0	0.266830510771905
0	0	0.333770504518339
0	0	0.226695972197406
0	0	0.328730430243002
1	0	0.505171560904246
0	0	0.569661665052565
0	0	0.34405558004084
0	0	0.325769918173116
1	0	0.3916051333634
0	0	0.036106652015207
0	0	0.138778284023911
0	0	0.116406167957671
0	0	0.146002206115219
0	0	0.231109326768236
0	0	-0.0891678393784461
0	0	0.247702259814418
0	0	0.356645507835257
1	0	0.486870821989167
0	0	0.152412754417882
0	0	0.242712035008687
1	0	0.392615179681199
0	0	0.367163721865606
0	0	-0.047623360066469
0	0	0.386964447113376
0	0	0.385751295409492
0	0	0.431630118219819
1	0	0.167591306318245
0	0	0.248977346300412
0	0	0.267477140990544
0	0	0.193904686286281
0	0	0.080463194282741
0	0	0.193585029658412
1	0	0.330640305450299
0	0	0.107984855008858
0	0	0.2201784345534
0	0	0.101747608445757
0	0	0.194529539471417
0	0	0.00796940618524823
0	0	0.169015142418586
0	0	0.506936420638189
1	0	0.376305510758488
0	0	0.260489677162199
0	0	0.197967973593488
0	0	0.119505720988517
0	0	0.336373943831192
0	0	-0.0383557240459485
1	0	0.312426248233332
0	0	0.322834336396526
1	0	0.254837978720745
0	0	0.0932043034637438
0	0	0.32051056197663
0	0	0.255558401548352
1	0	0.775745639144535
0	0	0.170247738876272
1	0	0.403414991555326
0	0	0.173811784062328
0	0	0.214212433081704
0	0	0.0712162367210013
0	0	0.302155093015553
0	0	0.0512459997317432
0	0	0.0855908662886247
0	0	0.193127852646365
0	0	0.153480620534836
0	0	0.118759687652366
1	0	0.0831853882435381
0	0	0.18713084280912
0	0	0.0468653688343788
0	0	-0.125409736541482
0	0	0.190810603365698
0	0	0.255079507623365
0	0	-0.0198699392800254
0	0	-0.0410162439495108
0	0	0.0298244853902018
0	0	0.219768557974856
1	0	0.100840871872837
0	0	0.0875884263193435
0	0	-0.00277851716393628
1	0	0.339381285298168
0	0	0.331208061871319
0	0	0.327321414650948
0	0	-0.0168015251923844
0	0	0.136223458020725
1	0	0.173250556519805
0	0	0.0799968134525179
0	0	0.257870096268463
0	0	0.198212841749669
0	0	0.12068251891771
0	0	0.000100007296016316
0	0	0.177492063265912
0	0	0.0208762796184858
0	0	-0.00910125875446448
0	0	0.0714377187966433
0	0	0.141635427152638
0	0	-0.0927301271915851
0	0	0.317831316303313
0	0	0.205740664601754
0	0	0.118295020038742
1	0	0.392467109926562
1	0	0.140961860482728
0	0	0.470668520986546
0	0	0.277092421264108
0	0	0.243915360716374
0	0	0.118358891578563
1	0	0.285974728185001
0	0	0.341673171025076
0	0	0.131714055399454
0	0	0.133094177437821
0	0	-0.0782708222886731
0	0	0.176275135315535
0	0	0.265991488415491
1	0	0.120711047324406
0	0	0.178262581184173
1	0	0.733999678694336
1	0	0.167906575042801
1	0	0.449609689133182
1	0	0.167905587852932
0	0	0.0564774792461314
1	0	0.350515849238927
0	0	0.375271065167104
0	0	0.435411626952813
0	0	0.246148408009466
1	0	0.335262102854097
1	0	0.588164991744056
0	0	0.0811587806977364
0	0	0.316650698040414
0	0	0.529387545084121
0	0	0.168989072609913
0	0	0.232454770177924
0	0	0.192208035479844
0	0	0.0190055646574924
0	0	0.031919251733568
0	0	0.307358306235878
1	0	0.290127547631606
0	0	0.198752992376512
0	0	0.36877754674771
0	0	0.257771669693369
0	0	0.197117249243974
0	0	0.277407083284062
1	0	0.242053232464172
1	0	0.387783499286555
0	0	0.212111408217137
0	0	0.103025482593198
0	0	0.311941922574167
0	0	0.332959192524179
0	0	0.0526075416436216
0	0	0.143585590456914
0	0	0.425591186374009
0	0	0.106059987192475
0	0	0.351278643027921
1	0	0.553904170607324
0	0	0.212681913901171
0	0	0.300323594127109
0	0	0.0294404409363478
0	0	0.159202247890827
0	0	0.263402912867631
0	0	0.129116517553207
0	0	0.25972699754695
0	0	0.251664251813294
0	0	-0.00436976335320265
0	0	0.269716884956292
0	0	0.230957610289994
0	0	0.235606385854392
0	0	0.22081843281139
1	0	0.180193786998776
0	0	0.187208572866246
0	0	-0.0360158881773281
1	0	0.645252580668661
0	0	0.114233736661009
0	0	-0.0621000691713495
0	0	0.27263952210378
0	0	0.130044977780525
1	0	0.0823092378716942
0	0	-0.121151945074396
0	0	0.0600472638734667
1	0	0.368521526312429
0	0	0.0682735215525601
0	0	0.168594378052564
0	0	-0.162806315957433
0	0	0.106238439430478
0	0	0.280962872748814
1	0	0.744640137743209
0	0	-0.0997114032385936
0	0	0.214442590647536
0	0	0.235684681998595
0	0	0.169872717436854
1	0	0.46953739785544
1	0	0.196025065386602
0	0	-0.0267299275274958
0	0	0.0947769256593929
1	0	0.686404126381803
0	0	0.214442590647536
0	0	0.105838143762203
1	0	0.232435530772071
0	0	0.220783877890491
1	0	0.431375755985822
0	0	0.311912439315598
1	0	0.242818623847349
0	0	0.286081824826592
0	0	0.17510544484766
0	0	0.120736519800563
0	0	0.280057830620026
0	0	0.350027188793291
0	0	0.248665748001602
0	0	0.0606227526353113
0	0	0.44977180285552
0	0	0.0253206538793319
0	0	-0.0104152486717008
1	0	0.349119441372187
0	0	0.13872570485971
0	0	-0.166401123483006
0	0	0.0691831287591038
0	0	0.290019952222896
0	0	0.0146017829260682
0	0	0.209051048849039
0	0	0.0560182914177818
1	0	0.452109210504023
0	0	0.157362123084858
0	0	0.107092272013352
0	0	0.236954391237439
0	0	0.252809675344115
0	0	0.232280639939391
1	0	0.384589609974968
0	0	-0.00703280694171856
0	0	0.165958535498235
0	0	0.095565055482306
0	0	0.0932672290505249
1	0	0.650642305321764
0	0	0.0381150083618508
0	0	0.383452490128731
0	0	0.0987538794174305
0	0	0.224116887518479
0	0	0.0226602932831284
0	0	0.297392449037037
0	0	0.200971232813316
0	0	0.143924512160558
0	0	0.252384003471714
0	0	0.183669581918852
0	0	0.0212515812411069
0	0	0.423739133667949
1	0	0.173011856251681
0	0	0.16750977041792
0	0	0.441307178457213
0	0	0.0188428977498146
0	0	-0.00501375143744358
1	0	0.27420581347432
0	0	0.125949896225191
0	0	0.227871314793864
0	0	0.195222756780475
0	0	0.149147081895331
0	0	0.555320500782827
0	0	0.345190083385134
0	0	-0.0292370050590792
0	0	0.191602698832575
0	0	0.0910572515556172
0	0	-0.178109696257235
0	0	-0.099666704380687
0	0	0.162116895977496
0	0	0.083036671001008
0	0	0.0972787678107482
0	0	-0.0712055791739871
0	0	-0.166630781226307
0	0	0.0608427368654653
0	0	0.0429974781258653
0	0	0.122218923808766
0	0	0.31738073103219
1	0	0.388589135330751
0	0	0.263233580037255
0	0	0.438448653221427
0	0	0.193187193202757
0	0	-0.0063702789611028
0	0	0.196219854972311
0	0	0.16150445085554
0	0	0.0856480405944336
0	0	0.403445498340651
0	0	0.0672577203069076
1	0	0.365843530812168
0	0	0.104347224602337
0	0	0.158420291371598
1	0	0.305960638302123
1	0	0.334544906984465
0	0	0.171482532069971
0	0	0.239808559851812
0	0	0.241297746194603
1	0	0.263430576660839
1	0	0.210326628666166
0	0	0.125421874458378
0	0	0.00350836781539433
0	0	-0.00710523659271548
0	0	-0.0226353845453254
0	0	0.714326686159114
0	0	0.152083681192474
0	0	0.225410233493709
0	0	-0.0825764141978935
0	0	-0.0464189029729566
0	0	0.307016357417968
0	0	0.0541411899543062
0	0	0.0759829161031234
1	0	0.453007260823534
0	0	0.204671029956109
0	0	-0.0163666035999784
0	0	0.249813975437535
0	0	0.208488338473015
0	0	0.175721727939198
0	0	0.222094852403727
0	0	-0.0372372483049098
1	0	0.0679962196830347
0	0	-0.092255657854021
0	0	0.141767474574683
0	0	-0.16216415469962
0	0	-0.198228784786419
0	0	0.167809005667684
0	0	0.220359389809074
1	0	0.445239433192075
0	0	0.0614279972716975
1	0	0.35085863580411
0	0	-0.0125622095584518
0	0	0.141508548973714
0	0	0.197614578107721
0	0	-0.11256469115896
0	0	0.166507141350322
0	0	0.356620837859332
0	0	0.00108643085681827
0	0	0.298454197222382
0	0	0.00687456732481173
0	0	0.0174587297369785
0	0	0.053138574030844
1	0	0.635378836534775
0	0	-0.0304266246682425
0	0	0.0638633167278634
0	0	0.101305963903114
0	0	0.176979002108804
0	0	0.163132403858493
0	0	0.0218046611062587
0	0	0.175361889463704
0	0	0.0237407133192171
0	0	-0.025459012102678
0	0	0.0883321310193096
0	0	-0.0284315690984745
0	0	0.0419025015324857
0	0	0.106463271262965
0	0	0.0452535195414066
0	0	-0.00125690949248687
0	0	0.178066688535112
0	0	0.117120723191205
0	0	0.178655190387575
0	0	0.0153679296571676
0	0	0.107257922651134
0	0	0.00796514831578645
0	0	-0.147042899140921
0	0	0.131529402203816
0	0	-0.0556263535171784
0	0	-0.0222426824085362
0	0	-0.114627040908338
0	0	0.302695655496779
0	0	0.236579089688088
0	0	0.215955423490174
0	0	0.077145606785776
0	0	0.0388642012419438
0	0	0.0430338136571517
0	0	0.0755778158210606
0	0	0.234344968774794
0	0	0.00485939121943326
0	0	0.43108481444762
0	0	-0.125829814456628
0	0	0.333204234251402
0	0	0.404243065845782
0	0	-0.01016110302883
0	0	0.323399515735954
0	0	0.0840630994938695
0	0	0.127684155968772
0	0	0.308221301544947
0	0	0.121324140597144
0	0	-0.0115167250439473
0	0	0.259405538589055
0	0	0.212228934908042
0	0	0.382504538548885
0	0	0.194868080440521
0	0	0.111259788519504
0	0	0.195892059621723
0	0	-0.00853369507956699
0	0	0.410515074844872
1	0	0.586253241384346
0	0	-0.0867412219366821
0	0	0.0706000708706261
0	0	0.247593502955116
0	0	0.0758159763043705
1	0	0.668346274629001
1	0	0.334931945926977
0	0	-0.172635045255314
0	0	0.184684655372486
1	0	0.279863959808726
0	0	-0.0248509528881738
0	0	0.116303595222461
0	0	0.0588672978912547
0	0	-0.0967990972347843
0	0	0.207229878964787
0	0	0.411875266887271
0	0	0.0854882456049941
0	0	0.099931315660092
0	0	-0.00548360631036766
0	0	0.222101012322216
0	0	0.0436457898003174
0	0	0.124374457141758
0	0	0.0357153800779144
0	0	0.348197063150838
0	0	0.0929184879480205
0	0	0.195524983478363
0	0	0.358639396041742
0	0	0.0475119208816228
0	0	0.0173165629817285
0	0	0.0408147494378827
0	0	0.247113858724364
0	0	0.392568642210663
0	0	0.209238246664721
0	0	0.256656080588013
0	0	0.310617651266453
0	0	-0.0281939254843076
0	0	0.374838449851672
0	0	0.0272545584494719
0	0	0.163962532415458
0	0	0.044595927740635
0	0	0.277194676370723
0	0	0.13806426208933
0	0	0.0344266430886112
0	0	0.0333147676964961
0	0	0.110519343525401
1	0	0.327096762418551
0	0	0.231956073069147
0	0	0.103332905322206
0	0	0.145502116658397
1	0	0.444963220693455
0	0	0.0638703752335723
0	0	0.14772142241043
0	0	0.00281689168223618
0	0	-0.0821541684668534
0	0	0.161406764100833
0	0	0.136166102966324
0	0	0.126922314940757
0	0	0.120756607926755
0	0	0.154227070084479
0	0	0.224088774173295
1	0	0.34250536076039
0	0	0.0994003226797457
0	0	0.182319324227518
0	0	0.35502541238889
0	0	0.116572393732488
0	0	0.249561008743605
0	0	0.0899631621134201
0	0	0.177754279038401
0	0	0.276413533590902
0	0	0.168463458489183
0	0	-0.0682739713338163
0	0	0.0421982548234453
0	0	0.288436285183973
0	0	0.262155337076842
0	0	0.143731935610415
0	0	0.135895581968139
0	0	-0.244625471154881
0	0	0.00498231763709985
0	0	0.217365055109281
0	0	0.206059080443157
0	0	-0.0453120437012791
0	0	-0.0258213136447104
0	0	0.234171992512046
0	0	0.259888097463521
0	0	0.073899670215393
0	0	0.30405633605133
0	0	-0.00408161602011307
0	0	-0.0592799692303922
0	0	-0.131825563462954
1	0	0.234455708636227
0	0	0.0967375529646346
0	0	0.0839639883965581
0	0	0.0357689870218184
0	0	0.266297893225421
0	0	0.225330652978522
0	0	-0.182186440970654
0	0	0.108557147775905
0	0	0.23690455399794
0	0	0.211053236447569
0	0	0.0146361473921956
0	0	0.13978548326611
0	0	0.280377140194613
0	0	0.0724673791704691
0	0	0.167637451281791
0	0	0.33908874994522
0	0	0.401166968131904
0	0	0.291130358686021
0	0	0.0249305235919591
0	0	0.048676867768011
0	0	0.266455916842343
0	0	0.62710057084214
0	0	0.0741282260362415
0	0	0.175582483220299
1	0	0.40233255867843
1	0	0.385342605135315
0	0	0.168036419132952
1	0	0.499934849865032
0	0	0.338955543611131
0	0	-0.134534965862718
0	0	0.0595509286601445
1	0	1.49469653303528
0	0	0.194477206018382
0	0	0.208496478425258
0	0	-0.125030090673558
0	0	0.367891921987405
0	0	0.487293849426534
0	0	0.147930477135565
0	0	0.00500256453439607
0	0	-0.0297583722896832
0	0	0.126740194299331
0	0	0.0162105632229894
1	0	0.441784762078982
0	0	-0.110026429031267
0	0	0.404764570564995
0	0	0.0454049052300462
0	0	0.133973032302537
0	0	0.757629886583847
0	0	0.206709741603135
0	0	0.17018338450099
1	0	0.630192059379723
0	0	0.0622484084194021
0	0	0.237473708476445
0	0	0.201780693946375
0	0	0.203766764772077
0	0	0.144893109962491
0	0	0.234160030552875
0	0	-0.108739527512662
0	0	0.0815289948564973
0	0	0.0985428843360122
0	0	0.134698022452375
1	0	0.556292537264036
0	0	0.103525880381412
0	0	0.207616175079273
0	0	0.180184365010891
1	0	0.214803511794558
0	0	0.478370598808231
0	0	0.285892458852404
1	0	0.537210774352324
1	0	0.295156831528129
1	0	0.416363448950937
1	0	0.519565700750431
1	0	0.462774589377562
0	0	0.520734543909652
0	0	0.124231151549154
0	0	0.119471173486749
0	0	0.324594301638282
1	0	0.133523946939632
0	0	0.0996511589025953
0	0	-0.0233637140216166
0	0	0.109833015072308
0	0	0.308308883949843
1	0	0.449159076971368
0	0	0.191555289040125
0	0	0.194612611833631
0	0	0.227088602093763
0	0	0.187247855772057
0	0	0.552161765154035
0	0	0.150785118672059
0	0	0.235814673737371
0	0	0.409100546187222
0	0	0.240711053851651
0	0	0.576555822952033
0	0	0.205049944639137
0	0	0.0386933485703618
0	0	0.142908429983511
0	0	0.038421508186012
0	0	0.199620024504263
0	0	-0.161774270920739
0	0	0.643300347605043
0	0	0.188056142456349
0	0	0.170500176415152
0	0	-0.045170104739059
1	0	0.518189643348923
0	0	0.346093883381073
0	0	0.402933002730414
0	0	0.306089180171513
0	0	0.148149065919036
0	0	0.391494261421115
0	0	-0.0767780525678372
0	0	0.301463922767363
0	0	0.0588704286793544
1	0	0.658561141460778
0	0	-0.0960784770298353
0	0	0.350976189902454
0	0	0.0928725164109156
0	0	0.452664570410112
0	0	0.194088296014494
1	0	0.420806989478404
0	0	0.0863712692566864
0	0	0.261900977967655
1	0	0.511615312814337
0	0	0.0648441086390373
0	0	0.195291029899705
1	0	0.414754148330268
0	0	0.137248469292253
0	0	0.157853710400658
0	0	0.168833266595645
0	0	0.0516491051917705
0	0	0.00699880265544963
0	0	0.334374754489305
0	0	0.305990346944889
0	0	0.248549337915868
0	0	0.0729072206908515
0	0	0.0105743989432179
0	0	0.174934227242684
0	0	0.254071211192393
0	0	0.00565928694951068
0	0	0.144720532428893
0	0	0.120901338645262
1	0	0.613774444553686
0	0	0.19571770950807
0	0	0.327319452081991
0	0	0.117478947873664
0	0	0.159341786348799
0	0	-0.0315171546351126
0	0	0.350866388659994
0	0	0.349993938251623
0	0	0.153096194835271
0	0	0.405286374433791
0	0	0.388571491582248
0	0	0.230258487583285
0	0	0.466178520810374
1	0	0.317702335836187
1	0	0.364473718247677
0	0	0.289703108596341
0	0	0.141827174092822
0	0	0.337603501088635
1	0	0.385692773382103
0	0	0.0137530751961215
0	0	0.502682146779926
0	0	0.178791432965457
0	0	0.113452551606685
0	0	0.296466033006261
1	0	0.296359893107647
0	0	0.0986991022982116
0	0	0.358356408416499
0	0	0.165011271907474
0	0	0.173908971634149
0	0	0.206441188993969
0	0	0.271085403680685
0	0	-0.288320540211965
0	0	0.330327330120026
0	0	0.319159610445879
0	0	0.0549681158088143
0	0	0.208616877276077
[truncated: 4,023 more rows]
