# Supplementary material for: Development and evaluation of a machine learning-based in-hospital COVID-19 disease outcome predictor (CODOP): A multicontinental retrospective study
Source: eLife. 2022 May 17;11:e75985. doi: 10.7554/eLife.75985 (PMC9129872; doi:10.7554/eLife.75985)
Supplement: Figure 4—figure supplement 1—source data 1. [file elife-75985-fig4-figsupp1-data1.xlsx]

## Sheet: Klen etal_Fig 2-figsup4_Sdata1
id	outcome	Days at hospital	CODOP
82	0	0	0.728198016255674
87	1	0	0.401199799226549
88	0	0	0.173239878247039
98	0	0	0.099778873634316
112	0	0	0.371883909022225
117	0	0	0.0968722476066654
125	0	0	0.0923234624741418
133	0	0	0.0888844338926643
136	0	0	0.675081315847369
138	0	0	0.124344192965475
139	0	0	0.225520878210614
140	0	0	0.49700740953085
141	0	0	0.23664572296058
142	0	0	-0.0683544219594449
143	0	0	0.21341766044834
145	0	0	0.202699182106096
146	0	0	0.253341119545671
149	1	0	0.535455184561585
154	1	0	0.345428817236391
156	0	0	0.266632969827721
159	0	0	-0.155649969028682
165	0	0	0.411102752823221
169	0	0	0.367762611435662
170	1	0	0.26207302921304
171	0	0	0.279751913088069
172	0	0	0.350682058633535
173	0	0	0.29146901671025
181	0	0	0.334970496004482
189	0	0	0.143850265067952
206	1	0	0.460693225078781
214	1	0	0.194773277879501
215	0	0	-0.135204453249679
218	0	0	-0.13391634858095
219	0	0	0.283851737637088
224	1	0	0.465842372837318
226	0	0	0.0181843818841193
227	0	0	0.380268723044777
228	1	0	0.265815818334411
229	0	0	-0.102672934048788
230	0	0	0.233341924803974
231	1	0	0.363935570063421
232	0	0	0.339873853500575
233	0	0	0.245319617640443
234	0	0	0.0478427432892098
235	0	0	0.206336472834969
236	0	0	0.123054932556301
237	0	0	0.182304058242537
239	1	0	0.388040933084793
240	1	0	0.510026670710512
241	1	0	0.441643612575778
242	0	0	0.0734748051669776
243	0	0	0.0592380409620755
244	0	0	0.0755206356952954
245	0	0	0.0686221353056247
246	1	0	0.407080149068344
247	0	0	-0.0133539826768834
248	0	0	0.27706145212788
249	1	0	0.34565846681858
251	0	0	0.110381927979873
253	0	0	0.203674182830675
254	0	0	0.111218990571575
255	0	0	0.179048963872813
256	0	0	0.326887280481027
258	0	0	0.096169649284878
259	1	0	0.272499033041534
260	0	0	0.375035419381295
261	0	0	0.28134711573261
262	0	0	0.156505931695718
263	0	0	0.143725858448765
264	0	0	0.513390233149182
265	0	0	0.283342751077474
267	0	0	0.240554614417923
268	0	0	0.260950500300973
269	0	0	0.327639731957827
270	0	0	0.06680102714476
271	0	0	0.170799338606374
272	0	0	0.224244061569875
273	0	0	-0.0407691756260175
274	1	0	0.15257900541086
276	1	0	0.364160891964661
277	0	0	0.134022122104914
278	1	0	0.22929906923252
279	1	0	0.517452616309083
280	0	0	0.0931391240074536
281	0	0	0.0213282230362264
282	0	0	0.437569749613113
283	0	0	0.0921610673309218
284	1	0	0.536626799282382
285	0	0	-0.0754550770619078
286	0	0	0.0401391713806286
287	0	0	0.386664205595546
288	0	0	0.241165052323918
289	1	0	0.107570434072495
290	0	0	-0.0615480698230213
291	0	0	-0.0491487336919039
292	1	0	0.453773282418038
293	1	0	0.312827279574378
294	0	0	0.245842197050356
295	0	0	0.0456887799088882
296	0	0	0.340238351692172
297	0	0	0.185356203287928
298	0	0	0.0877731866649563
299	0	0	0.0459236661978413
300	0	0	0.183133598590064
301	0	0	0.161145330431172
302	0	0	0.140037970618062
303	0	0	0.142172750640737
304	0	0	0.106343343106838
305	0	0	0.386221267664474
307	0	0	0.598081607256628
308	0	0	-0.0730860444504896
310	0	0	-0.0322065274311577
311	0	0	0.450133734789927
312	0	0	0.130520904761179
313	0	0	0.283465919197437
315	0	0	0.34575501642241
320	0	0	0.340985520356532
322	0	0	0.163342099233476
327	1	0	0.355413988242265
329	0	0	-0.156664078438021
330	0	0	0.31772858866992
332	0	0	0.306941426575609
337	0	0	0.215287387562415
342	0	0	-0.0267260784467305
343	1	0	0.409558522883404
350	0	0	0.272179154555478
351	1	0	0.723093879347364
355	0	0	0.441702759491933
362	0	0	0.234601045200218
364	1	0	0.304014369567026
365	0	0	0.228072509895932
370	1	0	0.23437170904858
371	0	0	0.578294028394945
372	0	0	0.0295665830127744
373	0	0	0.325245322642621
374	0	0	0.156827088948608
375	0	0	-0.0536335176248224
377	1	0	0.100709363011026
378	0	0	0.112766970414335
380	0	0	-0.0435177016442397
383	0	0	0.246167529575445
384	0	0	0.333968896134621
385	0	0	0.137544428021158
386	0	0	-0.0435177016442397
387	0	0	0.695003454845761
389	0	0	0.0232533197769241
390	0	0	0.0486390643223812
391	0	0	0.0599827365681036
392	0	0	0.068875283649826
393	0	0	0.000329593217329505
394	0	0	0.196882984808402
395	0	0	0.130992708281329
396	1	0	0.264907128171007
397	0	0	0.000911805781999394
398	0	0	0.203201479594734
399	0	0	0.195155072524347
400	0	0	0.187021700718438
401	0	0	0.052981708605528
402	0	0	0.067569240220254
403	0	0	0.210862777691408
404	0	0	0.0929132380356396
405	1	0	0.237970237260882
406	1	0	0.421587834506607
407	0	0	0.186369449768165
408	0	0	-0.00280982261388478
409	1	0	0.188009411077664
410	1	0	0.501850834509732
411	0	0	0.150105144052794
412	0	0	0.207580585646765
413	0	0	0.375120349321381
414	0	0	0.584968452300279
415	0	0	0.157245723998993
416	0	0	-0.028878526241525
417	0	0	0.396986030870704
418	0	0	0.237622453636508
419	0	0	0.369350916295488
421	0	0	0.0641766539083391
422	1	0	0.281175977454504
423	0	0	0.159109497498881
424	0	0	-0.10779967760521
425	0	0	0.0237556825413653
426	0	0	0.0174118307429789
427	0	0	0.314333700396826
428	0	0	-0.040772943516069
429	0	0	0.230188902700974
430	0	0	0.283582939649965
431	0	0	0.246666709843601
432	0	0	0.369401645786305
433	0	0	0.127984354042881
435	0	0	0.385104327364245
436	0	0	0.142221299471311
437	0	0	-0.0989093375095046
438	0	0	-0.0250872609264105
439	0	0	0.480104360298747
440	1	0	0.767163583517279
441	0	0	-0.00390917848376217
442	1	0	0.542772966954384
444	1	0	0.383422921931822
446	0	0	0.365035671490479
447	0	0	0.0792104748488111
449	1	0	0.5350150856696
451	0	0	0.228634718036614
452	0	0	0.362750247356841
457	0	0	0.0404481364155765
458	0	0	0.371177596090201
466	0	0	0.234766926394854
467	0	0	0.136510155629293
469	0	0	0.224176196626141
470	1	0	0.502211552425686
471	0	0	-0.0834679177054933
472	1	0	0.658760474143298
473	1	0	0.388763077282674
477	0	0	0.00982208930121958
478	0	0	0.358513916731137
479	0	0	0.240610973062533
482	0	0	0.199781441411257
483	1	0	0.595268938354496
484	0	0	0.403669458752797
485	0	0	0.119467681993219
486	0	0	0.043265121508672
487	0	0	-0.122016299131456
489	0	0	0.488372460606647
490	0	0	0.246420318701793
491	0	0	0.260088073136579
492	0	0	0.0960012421595727
493	0	0	0.342962416070692
494	0	0	0.00154061084373679
495	0	0	0.0856986756245628
497	0	0	0.136791208155793
498	0	0	0.122180002636955
499	0	0	0.280374379874893
500	0	0	0.0119506276215908
501	0	0	0.340933252451321
502	1	0	0.631510228656939
504	0	0	0.125953206912284
505	0	0	-0.0387477905350294
506	0	0	-0.184203863462424
507	0	0	0.141756680457282
509	0	0	0.285592063279606
511	0	0	0.583607514655689
512	0	0	-0.0973831357754881
513	0	0	0.310153688305745
514	0	0	0.142159522482965
515	1	0	0.188080652291894
516	0	0	0.620687571046985
517	1	0	0.381481781397359
519	0	0	0.145987959284656
521	0	0	0.232841832761882
522	0	0	0.463748101094369
531	0	0	0.416481617657467
532	0	0	0.12154043464501
534	0	0	-0.171267903510673
535	0	0	0.216722577197744
536	0	0	-0.0497842971243827
537	0	0	0.239137042639906
538	1	0	0.474826835182872
539	0	0	0.21425559425196
540	0	0	0.0870382516222841
541	0	0	0.179062135337055
542	0	0	0.383216407952852
543	0	0	0.285654562851569
544	0	0	0.0683844875080864
545	0	0	0.015284511782571
546	0	0	0.294667461706668
547	0	0	0.261796902528901
549	0	0	0.113872087137951
550	0	0	0.107599353824696
551	0	0	0.00670430602248196
552	1	0	0.437355980402191
553	1	0	0.180715851259495
554	1	0	0.247644023688491
555	0	0	0.300345685596475
556	0	0	0.108859697262706
557	0	0	0.140028663835117
558	0	0	0.109032691886234
560	0	0	0.286657971930025
561	0	0	-0.0168947864470249
562	1	0	0.714396131340542
563	0	0	0.117795149227958
564	0	0	0.363240200761442
565	0	0	-0.00795615036560886
566	1	0	0.338505256384546
567	0	0	0.152342491131516
568	0	0	0.0786904610730582
569	0	0	-0.030026679467832
570	0	0	0.240545163302531
571	0	0	0.281162076297578
572	0	0	0.140028663835117
573	0	0	0.0389873603155162
574	1	0	0.557223334940306
575	0	0	0.0894305585580821
576	1	0	0.401715693964912
577	0	0	0.110902114594342
578	0	0	0.201935198547384
579	0	0	0.322580355742147
580	0	0	0.139674277555181
581	1	0	0.343573627623155
583	0	0	-0.0140118503804313
585	0	0	0.10513817073035
586	0	0	-0.0725822458839916
587	0	0	0.0366448667235926
588	0	0	-0.159206899797281
591	0	0	0.215421308019421
592	0	0	0.140560463905803
593	0	0	0.432731375212877
594	0	0	-0.018380146772725
595	0	0	0.170231248717154
596	1	0	0.759508851215319
598	0	0	0.103735524372319
599	1	0	0.321077409553341
600	0	0	0.359206552437744
601	1	0	0.705773620786363
602	0	0	0.116801635525071
603	0	0	0.00128026449111287
604	0	0	0.333097866441086
605	0	0	0.233072468426484
606	0	0	0.349831304113461
607	0	0	0.381493789477703
608	0	0	0.406766428399915
609	1	0	0.326919457704165
610	0	0	0.499300393292437
611	0	0	0.254440476838249
612	0	0	0.183843520541089
613	1	0	0.316133207117688
614	0	0	0.188582806620579
615	0	0	0.111031938375931
616	1	0	0.27242424687654
617	0	0	0.0892051007677285
619	0	0	0.480827314819595
620	0	0	0.105971536623796
621	0	0	-0.00375959366861347
622	0	0	0.246585484438889
623	1	0	0.355443692560074
624	0	0	0.199644341156806
625	0	0	0.242825602459639
627	0	0	0.267429540914677
628	0	0	0.284189354962304
629	0	0	0.285604318236409
630	1	0	0.49506328900251
631	0	0	0.0796395623859993
633	0	0	0.278657452950828
634	0	0	0.113790146331414
635	0	0	0.49214556063783
636	0	0	0.350366607561352
637	0	0	0.107902830146965
638	0	0	-0.0517084520983678
639	0	0	0.194805109528672
640	0	0	0.0223924895355371
642	0	0	0.222057820611892
643	1	0	0.579932348750516
644	0	0	0.241179281099444
646	0	0	0.157332255064217
647	0	0	0.377275369198546
648	0	0	0.451811335082043
649	0	0	0.210194721233922
650	0	0	0.507214410063747
651	0	0	0.225717111663355
652	0	0	-0.0346959888547007
653	1	0	0.386045786072039
654	0	0	0.13902265579364
655	0	0	0.198494152001426
656	0	0	0.398332305807673
657	0	0	0.200590226020269
658	0	0	0.244130556072197
660	0	0	0.217670897655354
661	1	0	0.295135278534093
662	0	0	0.381170952400156
664	1	0	0.353560004505609
665	0	0	0.145744181822348
666	1	0	0.394356147751455
667	0	0	0.492997782107728
669	0	0	-0.10036932891296
670	0	0	0.178667326081657
671	0	0	0.236430499305773
673	0	0	0.231943946942219
674	0	0	0.428954040919381
676	0	0	0.215830487704809
677	1	0	0.423437873017533
678	0	0	0.321752890363051
679	0	0	0.291104524333963
680	0	0	0.251865444132923
681	0	0	0.505726116289433
682	0	0	0.125909115298457
683	0	0	0.147856438507892
684	0	0	0.241360564049169
685	0	0	0.136200992269074
686	0	0	0.125888532863104
687	1	0	0.597806992821907
688	0	0	0.0595793657544153
689	0	0	0.269649807344045
690	0	0	0.203726732933353
691	1	0	0.233945646507173
692	1	0	0.739431892353204
693	0	0	0.0736608331529715
694	1	0	0.251820090986029
695	0	0	0.296184429607742
696	0	0	0.382798479622148
697	0	0	0.0689401744590294
698	0	0	0.161101733702385
699	0	0	0.765405309503141
701	0	0	0.30300683353907
702	0	0	0.182662601523376
705	0	0	0.310722729845627
706	1	0	0.173179960177948
708	0	0	0.208004767142161
709	0	0	0.0365422761923146
710	0	0	0.169865379429148
711	1	0	0.410587701213007
715	0	0	0.189634612003377
716	0	0	0.263004399734064
720	0	0	0.369440698777916
723	1	0	0.753151555203693
724	1	0	0.771518066001608
726	0	0	0.163201101327734
728	0	0	0.153275695642028
731	1	0	0.561667487753354
732	1	0	1.25123778109366
733	0	0	0.155797360827347
737	0	0	0.382950412950532
738	0	0	-0.0630391841622129
739	1	0	0.294628776975591
740	1	0	0.333683262924283
742	0	0	0.291785466371024
744	0	0	0.230748880538689
746	0	0	0.211682747659933
747	1	0	0.423361023358395
748	0	0	0.196871326020439
749	0	0	0.244739878145348
750	0	0	0.408498070311307
751	0	0	0.27353377018263
752	0	0	0.233807690840576
753	1	0	0.40084751588873
754	1	0	0.411920666134023
755	0	0	0.0366489061155722
760	0	0	0.255081615940602
761	0	0	0.320481246285735
762	1	0	0.471946245707585
763	0	0	0.303242077114802
764	1	0	0.419911783383365
765	0	0	0.214844830045022
766	1	0	0.392398460727743
767	1	0	0.34336114417591
768	0	0	0.306605851404938
770	0	0	0.345605295024735
771	0	0	0.247394421831733
772	0	0	0.404274801185305
773	0	0	-0.0843756947724696
774	0	0	0.222546617824906
775	0	0	0.114672779864921
777	0	0	0.367969507416017
778	0	0	0.274456940952838
779	1	0	0.577927511682785
780	0	0	0.0820540141407713
783	0	0	0.253180466463793
784	0	0	0.213521199342581
787	0	0	0.60038439435509
790	1	0	0.566727370482781
791	0	0	0.342539432719134
793	0	0	0.47159049522269
794	1	0	0.347455088114115
796	1	0	0.213780899162591
798	0	0	0.364272118964977
800	0	0	0.300608631525227
801	1	0	0.278623973766774
802	1	0	0.724485304570751
803	1	0	0.590367892413075
804	0	0	0.305890253096905
805	1	0	0.268433977413281
806	0	0	0.0276141203074042
807	1	0	0.441927702812406
808	0	0	0.079926581427656
809	0	0	0.0511363401883643
810	0	0	0.245385230054895
812	0	0	0.221045551629863
813	0	0	0.226844753814925
814	0	0	0.390128551270448
815	0	0	0.286871635041541
816	1	0	0.314697358836131
818	0	0	0.0393644596815125
819	1	0	0.572736549505978
820	0	0	0.10895318529177
822	0	0	0.0596827060134305
823	0	0	0.0687388474651182
825	0	0	0.158547637346413
826	1	0	0.576379851728838
827	0	0	0.0225492886018082
828	0	0	0.246764283776636
829	0	0	0.233507626661825
832	0	0	0.180961555460842
833	0	0	0.389346491329461
835	1	0	0.312717768792671
836	0	0	0.252452732376141
837	0	0	0.0756549638126347
838	1	0	0.571461550364251
839	0	0	0.262673878328896
840	0	0	0.253419661434177
841	0	0	0.180760340576241
842	0	0	0.107166541843458
843	0	0	0.137634436399081
844	0	0	0.169888332472091
845	1	0	0.288824384425397
846	0	0	0.332912803424206
847	0	0	0.436838995041447
848	1	0	0.296879100896019
850	0	0	0.175026364910175
851	0	0	0.180746616408889
852	0	0	0.330717946112281
854	0	0	0.408446369829143
855	1	0	0.433348225105058
856	1	0	0.244533766747746
857	1	0	0.416399685995912
858	0	0	0.057437892383981
859	1	0	0.363605812613271
860	0	0	0.0186187437896858
861	1	0	0.1304444561536
862	0	0	-0.0374064311469769
863	0	0	0.0716194961433041
864	0	0	0.216618339900561
865	0	0	0.107304546429102
866	0	0	0.209305723206077
868	0	0	0.298454835274633
869	1	0	0.334541176512449
870	0	0	-0.0225535889291295
871	0	0	0.0628665327511643
872	0	0	0.163544666775023
873	0	0	0.0930987471965424
874	0	0	0.201772446068544
875	0	0	0.299762184242337
876	0	0	0.190165268911588
877	0	0	0.21277803583982
878	1	0	0.236882131806323
879	0	0	0.143194228712679
880	0	0	0.0931611191035903
881	0	0	0.145486717894546
882	0	0	0.137354202839221
883	0	0	0.226324522195043
885	0	0	0.296089644976865
886	0	0	0.186581410048454
887	0	0	0.138519006913984
888	0	0	0.222433453827843
889	0	0	0.191846757084428
890	0	0	0.191842598359366
891	0	0	0.197466987564148
892	0	0	0.0736091383393568
893	1	0	0.367919072143089
895	1	0	0.268807311390418
896	0	0	0.215347038872141
897	0	0	0.0562985902925481
898	0	0	0.108903632869276
899	0	0	0.15855926895928
900	1	0	0.0536286979141198
901	0	0	0.0646096065704015
902	1	0	0.308988642817714
903	0	0	0.0552397301544608
904	0	0	0.230729872548419
905	1	0	0.238687045857708
906	1	0	0.293121032178442
908	1	0	0.206304350115698
909	1	0	0.296029979981126
910	0	0	0.240958908629635
911	0	0	0.107223033178909
912	0	0	0.0168666355235916
913	0	0	0.062853745246662
914	0	0	0.0750935248791483
915	1	0	0.449621650552432
916	1	0	0.388180374427781
917	1	0	0.374455049844437
920	0	0	-0.160690305156775
921	0	0	0.151645719875141
922	0	0	0.402004136993208
923	0	0	0.13553280510785
924	1	0	0.296492683492078
925	0	0	0.11460509479272
926	0	0	0.116103146949183
927	0	0	0.127264191195832
928	1	0	0.418609204037507
929	0	0	0.223335647506994
930	0	0	0.168050032587156
931	0	0	0.0960053805677652
932	0	0	0.380547180886667
933	0	0	0.0694826586306978
934	0	0	0.126279558810133
936	0	0	-0.0335593577506295
937	1	0	0.268588302904924
938	0	0	0.114913308376699
939	0	0	0.0298460259484343
940	0	0	0.30800253431004
941	0	0	0.109023453673131
942	0	0	0.134370722631979
943	0	0	0.198284059556244
944	0	0	0.0426779522120184
946	0	0	0.410367771394225
947	0	0	0.134370722631979
948	0	0	0.0920473036504313
950	0	0	0.416628728284579
951	1	0	0.352306256759939
952	0	0	-0.00276001708392686
953	0	0	0.127955662646914
954	0	0	0.316640051212198
955	1	0	0.54976203987129
956	1	0	0.469587319083074
957	0	0	0.202249954062986
960	1	0	0.603056306203801
963	0	0	-0.142451582160541
964	0	0	-0.124237052859021
966	0	0	0.0172452210715216
967	0	0	-0.0276888961834974
968	1	0	0.711499654513782
969	0	0	0.0976085061827543
972	0	0	0.318992018372528
973	1	0	0.569593231438727
974	1	0	0.628134815941295
977	1	0	0.356508765512251
978	0	0	0.382030467002987
981	0	0	0.207437114640791
982	0	0	0.00663261681470713
983	0	0	0.264939080721339
985	0	0	0.0788704751431779
986	0	0	-0.0320746693661987
987	0	0	-0.0767973982081756
988	1	0	0.63083685769005
990	1	0	0.574036463696788
991	0	0	0.197608445287246
993	0	0	0.0127599333813092
995	1	0	0.597533398230428
996	0	0	0.200653343467643
1000	1	0	0.434124732757157
1001	1	0	0.451017977260654
1002	0	0	0.252320017492252
1003	0	0	0.309513246918201
1007	0	0	0.100993650909425
1008	0	0	0.32534642458878
1009	0	0	0.192502333917869
1011	0	0	0.129214996397276
1013	0	0	-0.0174443062502302
1015	0	0	-0.0625297187814992
1016	0	0	0.145212037027465
1017	1	0	0.0903759058985823
1019	0	0	0.324606408059824
1020	0	0	0.129352377903776
1021	0	0	0.0402737355930154
1022	0	0	0.185669815805671
1023	1	0	0.306914585098922
1024	0	0	0.022383252452634
1025	1	0	0.445282610940303
1029	0	0	-0.031613700937586
1030	0	0	-0.0159769163331815
1031	0	0	0.157744259751689
1032	1	0	0.346588703023148
1033	0	0	0.0877064754212979
1034	0	0	0.295880509205017
1035	1	0	0.307942629155243
1036	0	0	0.283206652285645
1037	1	0	0.37383190379955
1039	0	0	0.0423884424957937
1040	1	0	0.495415311231101
1042	1	0	0.456201461157628
1043	0	0	-0.0136913131217301
1044	1	0	0.317036186580983
1046	0	0	0.291558156220361
1047	0	0	0.450682570201878
1048	0	0	0.196705099693847
1049	0	0	0.126005258663303
1050	0	0	0.119711752757483
1051	0	0	0.297498954905763
1055	1	0	0.506273260911814
1056	0	0	0.0796380434641885
1057	1	0	0.402220648123581
1059	0	0	0.0112431885220161
1060	0	0	0.138098385057987
1061	0	0	0.00914324063971634
1063	0	0	-0.200274889802962
1064	0	0	0.257776435189079
1065	0	0	0.337770237953596
1066	0	0	0.319277634757215
1067	1	0	0.514802699866499
1068	0	0	0.208075539042252
1069	0	0	0.434048958229743
1070	1	0	0.416984829541301
1071	0	0	0.315601969551061
1072	1	0	0.707683514163809
1074	0	0	0.351101462003491
1075	1	0	0.336532190337478
1076	0	0	0.178702932739154
1077	0	0	-0.058760977754626
1078	0	0	0.22839999089088
1079	0	0	0.109598827617984
1080	0	0	0.210084285792296
1082	1	0	0.348745916752147
1083	0	0	0.213057932990928
1084	0	0	0.125648222810085
1085	0	0	0.357904943113076
1086	0	0	0.124058906140536
1087	0	0	0.145030469884466
1088	1	0	0.475103785116702
1089	1	0	0.256163343980574
1090	0	0	0.281433947026583
1091	0	0	0.312772903518917
1092	1	0	0.358991794447258
1093	0	0	0.125812716052718
1094	1	0	0.577156312533439
1096	0	0	0.2771342256134
1098	1	0	0.340707088416562
1099	0	0	0.254980441787631
1100	0	0	-0.043115246368844
1101	0	0	-0.113720015248784
1102	0	0	0.0954278218041984
1103	1	0	0.463395163050191
1104	0	0	0.179087416872976
1105	0	0	0.36827391407954
1106	1	0	0.305067488654577
1107	0	0	0.257091696678228
1108	0	0	0.378391821795942
1109	0	0	0.264462692520035
1110	0	0	0.0742475446344082
1111	0	0	0.307469946153993
1113	0	0	-0.0940563903898732
1114	1	0	0.161295583339122
1115	1	0	0.437430562799397
1116	0	0	0.265628119981003
1117	0	0	0.262544700921682
1118	0	0	0.179956164327859
1119	0	0	0.041365287271606
1120	1	0	0.267396990241969
1122	0	0	0.259855486305311
1124	0	0	0.267226133880868
1125	1	0	0.503128049044503
1126	0	0	0.428984896641232
1127	0	0	0.102951949169203
1128	0	0	0.042424413779651
1129	0	0	0.199455628601646
1130	1	0	0.261599658859292
1131	0	0	0.280791174352011
1132	0	0	0.316381985565992
1133	0	0	0.452799378256998
1134	0	0	0.0706072035185201
1135	0	0	0.236533297049436
1136	0	0	0.181314197447711
1137	0	0	0.172009306580657
1138	0	0	0.515520038659306
1139	0	0	0.0111568508762664
1140	0	0	0.359661468126312
1141	0	0	0.215630299592712
1143	0	0	-0.0248510869691689
1144	0	0	0.0677010700619071
1145	0	0	0.13206507311499
1147	0	0	0.242787212022785
1148	0	0	-0.0737295601970599
1150	0	0	0.315226418360845
1151	1	0	0.471758894564824
1152	0	0	0.146564999629266
1153	0	0	0.198161931896185
1154	0	0	0.272993548362272
1155	0	0	0.397194839316023
1156	0	0	-0.248559537622478
1157	0	0	0.176064390073644
1158	0	0	0.299798690221261
1159	0	0	0.0960924897548651
1160	0	0	-0.046208061543715
1161	0	0	0.10159805393534
1162	0	0	0.199569283732193
1163	1	0	0.277221134364225
1164	0	0	0.204125033023329
1165	1	0	0.350702491759194
1166	1	0	0.225160149941471
1167	0	0	-0.00324519506467726
1168	1	0	0.305588971897669
1169	0	0	0.145787802765675
1171	0	0	0.00834661596937943
1172	0	0	-0.000516820465922353
1173	0	0	-0.03179370483373
1174	1	0	0.374871269352053
1175	0	0	0.133631517254584
1176	0	0	0.273631343697062
1177	1	0	0.349297305801977
1178	0	0	0.163633687682083
1179	1	0	0.546949115243972
1180	0	0	0.306773425024509
1181	0	0	-0.0620407915406989
1182	1	0	0.24466024990926
1183	0	0	0.031855677847863
1184	1	0	0.417071436254759
1185	0	0	0.30112228970436
1186	1	0	0.190527031339623
1187	0	0	0.202704606345614
1188	0	0	0.27196288264684
1189	0	0	0.172773423811849
1190	0	0	-0.0648279693093354
1191	1	0	0.314837831478308
1192	0	0	0.274376976373215
1193	0	0	0.230854479961943
1194	1	0	0.334476617940161
1196	0	0	-0.0283511219461026
1198	0	0	0.468072680594063
1200	0	0	0.281250319990636
1201	0	0	0.03282510777942
1202	0	0	0.199987415404694
1203	1	0	0.5704506394574
1204	0	0	0.265721265305029
1205	1	0	0.400932270167646
1206	0	0	0.324566175265378
1208	1	0	0.226894760452709
1209	0	0	0.243309649907599
1210	0	0	0.289145549157174
1211	0	0	0.174464242507771
1212	0	0	0.174701960353253
1213	0	0	-0.0961510162972919
1214	1	0	0.269795144977026
1215	0	0	0.221193343726121
1216	1	0	0.445823751047087
1217	0	0	0.240406644461075
1218	0	0	0.198236666913886
1219	0	0	0.0732171693576264
1220	0	0	0.228426484291872
1221	0	0	0.223503500044156
1222	0	0	0.13051410752086
1223	0	0	0.163511440800417
1224	0	0	0.316874462301519
1225	0	0	0.348222056302167
1226	0	0	0.0315110853711055
1227	0	0	0.13160315338577
1228	0	0	0.109180906433103
1229	1	0	0.495898235421498
1230	1	0	0.346972429541657
1231	0	0	0.211391291430099
1232	0	0	0.152825818794407
1233	0	0	0.117890887458127
1234	0	0	0.00372799674758607
1235	0	0	0.00282304224049413
1236	0	0	0.0162750450318877
1238	0	0	0.143754870642548
1239	1	0	0.258732761614989
1240	0	0	0.191436639258536
1241	1	0	0.324666738557469
1242	1	0	0.353558422227101
1243	1	0	0.19878540158602
1244	0	0	0.113312805585346
1245	1	0	0.311721902201236
1246	1	0	0.451609088834344
1247	0	0	0.215427020481157
1248	0	0	0.193358950832794
1249	0	0	0.221893927991131
1250	0	0	-0.040123241040738
1251	0	0	0.223412623830067
1252	0	0	0.127634210147625
1253	1	0	0.437014075304953
1254	0	0	0.198106104843407
1255	1	0	0.21404440695612
1256	0	0	0.0618807036221586
1257	0	0	0.16809430718033
1258	1	0	0.409296146362511
1259	0	0	-0.0327690389800224
1260	0	0	0.16773787430796
1261	1	0	0.202287999820211
1262	0	0	0.0921786729386598
1264	0	0	0.146974516725606
1265	0	0	0.218588608530516
1266	0	0	0.155765103109271
1267	1	0	0.49499199230854
1268	0	0	0.00479027530798186
1269	0	0	0.280518533517761
1270	1	0	0.329240047098587
1271	0	0	0.404671722694697
1272	0	0	0.0576367871892097
1273	0	0	0.0821665517868875
1274	0	0	0.264006964940706
1275	0	0	0.317665245961816
1276	0	0	0.356850769386111
1277	0	0	0.251236851397041
1278	0	0	0.0629163698029835
1279	0	0	0.260845676279736
1280	0	0	0.340972846118937
1281	0	0	0.289106949731755
1282	0	0	0.20104043375062
1283	0	0	0.0638701485239406
1284	0	0	0.24085726299418
1285	0	0	0.121045204534365
1286	0	0	0.237528469916571
1287	0	0	0.192419650008536
1288	0	0	0.152428722751659
1289	0	0	-0.0675649832599736
1290	0	0	0.233807717054521
1291	0	0	0.254469781312579
1292	0	0	-0.0527660455721934
1293	1	0	0.414305497580271
1294	0	0	0.0632373544223351
1295	1	0	0.391182876743913
1296	1	0	0.33247901340833
1297	0	0	-0.04314536015388
1298	0	0	0.0935541189320109
1299	0	0	0.0136398362976976
1300	0	0	0.293079228979037
1301	0	0	0.225159844257915
1302	0	0	0.243220520142674
1303	1	0	0.495233092062519
1304	1	0	0.214929168543036
1305	0	0	0.0731526128892535
1306	0	0	0.0378728781263269
1307	1	0	0.238834788377747
1309	0	0	0.494091327450732
1310	1	0	0.224072051045938
1312	1	0	0.086901922182506
1313	0	0	0.105883437307406
1315	0	0	-0.0666390863362482
1316	0	0	-0.158605704251376
1317	0	0	0.119700712274382
1318	1	0	0.429024414053852
1319	0	0	0.0248929650115501
1320	0	0	0.18724356462925
1322	0	0	0.00582594839498058
1323	0	0	0.163552252350883
1324	0	0	0.246257702752515
1325	0	0	0.937404068685908
1326	0	0	0.22761929488437
1327	0	0	0.150126921007645
1328	0	0	0.173518718236208
1329	0	0	-0.00702121018070869
1330	0	0	0.0098985530874633
1331	0	0	0.328128638253217
1332	0	0	0.340813233465756
1333	0	0	0.0537306454629672
1334	0	0	0.145086345662424
1335	0	0	0.0919010013477873
1336	0	0	0.366492190634948
1337	1	0	0.280832740568469
1338	1	0	0.277023554634795
1339	1	0	0.359397503009743
1340	0	0	0.116351138577408
1341	0	0	0.0852587412349682
1342	1	0	0.312550395289131
1343	0	0	0.203517567450366
1344	0	0	-0.0506780439842089
1345	1	0	0.310663274426951
1346	0	0	0.241147787773555
1347	0	0	0.263913430162295
1348	0	0	0.139397232147521
1349	1	0	0.243115928200967
1350	0	0	0.199901532804312
1351	0	0	0.321193264258725
1352	0	0	-0.0315573839769689
1354	0	0	0.123224654335292
1356	0	0	0.378570414909841
1357	0	0	0.123416426221647
1358	0	0	0.26163191252696
1359	0	0	0.261733264299021
1360	1	0	0.232572178742421
1361	0	0	-0.1461673954579
1362	1	0	0.421983573165591
1363	0	0	0.0619775886784897
1364	0	0	0.329154118451076
1365	0	0	0.197846289211801
1366	0	0	0.324832841574409
1367	0	0	0.249745683638773
1368	1	0	0.348131487756972
1369	1	0	0.369220444773366
1370	0	0	0.155313869142255
1371	0	0	0.17907938969292
1372	0	0	0.244783984518285
1374	0	0	0.11431524590534
1375	1	0	0.465606561880352
1378	0	0	0.303443505062709
1379	0	0	0.278548112195178
1380	0	0	0.285966225790039
1381	0	0	0.507041388954593
1382	0	0	0.465078401013346
1383	0	0	0.0690939595409568
1384	0	0	0.259800267081073
1385	1	0	0.555523386406234
1386	1	0	0.533634855232
1387	1	0	0.439217246552399
1388	1	0	0.446418419267685
1389	1	0	0.406409223377268
1390	1	0	0.527119780015664
1391	0	0	0.331063777700131
1392	1	0	0.48776645760772
1393	1	0	0.38986332716588
1394	1	0	0.625234078889973
1396	0	0	-0.187576555080896
1397	0	0	0.0649369412712688
1398	0	0	0.0680694816725837
1399	0	0	0.0219220620289512
1400	1	0	0.412068202927153
1402	0	0	0.0842817972994484
1403	0	0	-0.0680074971498888
1404	0	0	0.136786736096015
1405	1	0	0.476347932805406
1406	1	0	0.331289380989893
1407	1	0	0.151851279349328
1409	1	0	0.36054015453533
1410	0	0	0.15469123611184
1411	0	0	0.208885331533385
1413	1	0	0.595848457807724
1414	1	0	0.311996312486185
1417	0	0	-0.116599619349957
1419	0	0	-0.0493115732015046
1420	0	0	0.148362068022807
1421	0	0	0.309605557020535
1422	0	0	0.077356299570696
1423	1	0	0.463816027598682
1424	0	0	0.404292930682111
1426	0	0	-0.07019679127291
1427	0	0	-0.181396594144653
1428	0	0	0.218131112502295
1429	0	0	0.150075092747598
1431	0	0	0.29843676580962
1432	0	0	0.0895800718437579
1433	0	0	-0.00306382356713903
1434	0	0	0.162172876699267
1435	1	0	0.36007762310733
1436	0	0	0.0524733092303153
1437	1	0	0.225413779882706
1439	0	0	0.152013597410198
1440	1	0	0.752624730427683
1441	0	0	0.224778021045695
1442	0	0	0.264809721322939
1443	0	0	0.157202956779473
1445	0	0	0.438608592910939
1446	0	0	0.200417076087427
1447	0	0	0.453130438268662
1448	0	0	0.190377867437169
1449	0	0	0.302953182758476
1450	0	0	0.200177648445081
1451	1	0	0.390567957105487
1452	0	0	0.436199624542383
1454	0	0	0.229374705368282
1456	0	0	0.0973210112557853
1459	1	0	0.307989322405499
1460	0	0	0.0411349851032789
1461	1	0	0.516098372960184
1462	1	0	0.370252465450914
1463	0	0	-0.0964251204772726
1464	0	0	0.0527905273858944
1466	0	0	0.0407845059265004
1467	0	0	0.194608725333558
1468	0	0	0.24946852608
1469	1	0	0.19663572850211
1470	0	0	0.12929398604462
1471	0	0	0.388035893292888
1472	1	0	0.516952308298787
1474	0	0	0.0621212931022134
1475	0	0	0.0614847027864183
1476	1	0	0.480742806139284
1477	1	0	0.8874467664982
1478	1	0	0.443046843034692
1479	0	0	0.134959926492716
1480	0	0	-0.02685640631335
1481	1	0	0.835664519200094
1482	0	0	0.242765931035856
1484	0	0	0.216392988558766
1487	0	0	0.441136741533431
1488	0	0	0.431264867033989
1489	0	0	0.169588496620416
1490	1	0	0.625671951215192
1492	0	0	0.230594156008137
1494	1	0	0.552643818611741
1495	1	0	0.387435727118096
1496	0	0	0.241620579568109
1497	1	0	0.342986160839058
1499	0	0	0.203350448139387
1500	1	0	0.452459503040588
1501	0	0	0.148365382759922
1502	1	0	0.552541060427744
1503	0	0	0.21139003817055
1504	0	0	0.301876870923749
1506	1	0	0.248340443553189
1507	0	0	0.204424667450689
1508	1	0	0.431884322945954
1510	1	0	0.357634985493582
1511	0	0	-0.0714324368990659
1514	1	0	0.429651628327605
1516	1	0	0.288471428893298
1517	1	0	0.261579695958962
1518	0	0	0.0223522444861723
1519	0	0	0.142064931307761
1520	1	0	0.264139692846095
1521	1	0	0.244046242869945
1522	0	0	-0.0401724737408557
1523	1	0	0.190639930316149
1524	0	0	0.138241849814938
1525	1	0	0.639089484459517
1526	0	0	0.320029203281839
1527	0	0	0.157845655305933
1528	0	0	0.0824629759689478
1529	1	0	0.346832605864233
1530	0	0	0.403987633535724
1531	0	0	0.472877198362656
1532	0	0	0.252687044831858
1533	0	0	0.302464167766388
1537	0	0	0.165768956717498
1538	0	0	0.168978634000142
1539	0	0	0.154161689347376
1541	1	0	0.228604441121255
1543	0	0	0.237374879721876
1544	1	0	0.268639300201872
1545	0	0	0.300417589945541
1546	0	0	0.132891005465283
1547	0	0	0.312072963754751
1549	1	0	0.396032242695955
1550	0	0	0.182799882620572
1552	1	0	0.523639835113197
1553	0	0	-0.0735315533701202
1554	1	0	0.313092152753507
1555	1	0	0.702142929187618
1556	0	0	0.228816997085446
1557	0	0	0.366991407556276
1558	0	0	0.293478987828853
1559	0	0	0.12864702024783
1560	0	0	0.201752150945171
1561	1	0	0.392618249497272
1563	1	0	0.320274323364044
1564	0	0	0.301213419061247
1566	1	0	0.2041406895943
1567	0	0	0.144161291324876
1568	0	0	0.2769256979856
1569	0	0	0.297063141110955
1574	0	0	0.0559302843710622
1575	0	0	0.383567286866503
1576	0	0	0.246277891011148
1577	0	0	0.201928358184112
1578	0	0	0.415117238344874
1579	0	0	0.144634729669076
1580	0	0	0.12097723793435
1581	0	0	0.113933818524356
1583	0	0	0.170006663432831
1584	0	0	-0.00783382093955601
1585	1	0	0.360796514601134
1586	0	0	0.158138205358786
1587	0	0	-0.0552679979183864
1588	0	0	0.267243291997187
1590	1	0	0.170170923527417
1591	1	0	0.10818118918154
1592	1	0	0.468357508057764
1593	0	0	-0.0938338933461197
1595	1	0	0.372024472388633
1596	0	0	0.221530259610489
1597	0	0	0.027906299799273
1598	1	0	0.447283938338036
1599	0	0	-0.00292369220782135
1600	0	0	0.0356188950522591
1601	0	0	-0.132716702310151
1602	0	0	0.0699216139184608
1603	0	0	0.0124014678882991
1612	0	0	0.0267758889677964
1614	0	0	0.245796839055564
1617	0	0	0.0544518465683119
1618	0	0	0.12047904748205
1619	1	0	0.333914160031835
1620	0	0	0.561315762852778
1621	1	0	0.543115694243525
1623	0	0	0.182563625922478
1625	0	0	-0.0384008055719589
1626	0	0	0.278586593645362
1628	0	0	0.168959450730339
1629	0	0	-0.0571476762941453
1630	1	0	0.402612478446432
1631	1	0	0.40552721392161
1632	0	0	0.238666531476246
1633	1	0	0.0969962395374146
1634	0	0	-0.00166617553414356
1635	0	0	0.091514449807798
1636	0	0	0.259624039715116
1637	0	0	0.00974436711082748
1638	0	0	0.214430830343941
1639	0	0	0.101083728790535
1640	0	0	0.20572587415252
1641	0	0	-0.077441527743365
1642	0	0	0.0912392265702532
1643	0	0	0.200643714417228
1644	0	0	0.0471098153789649
1645	0	0	0.185765926109932
1646	1	0	0.215271892770892
1648	0	0	0.23330943103673
1649	0	0	0.456851534468523
1654	1	0	0.659583557954254
1656	1	0	0.661827667726975
1667	0	0	0.3289635593759
1672	0	0	0.47282960828673
1676	0	0	0.35224707988001
1683	0	0	0.415817335801952
1688	0	0	0.468731976073636
1689	0	0	0.0358555644539708
1690	0	0	0.0256813699783483
1691	0	0	0.2627878975207
1692	0	0	0.220069288066371
1693	1	0	0.279689465782042
1695	0	0	0.0431383699863256
1696	1	0	-0.0128066638369581
1697	0	0	0.248953612791569
1698	1	0	0.477649470373949
1699	0	0	0.137750777086612
1700	0	0	0.268670476044907
1701	0	0	0.225613545888415
1702	0	0	-0.0951189633465598
1703	0	0	0.0335280268525315
1704	0	0	0.14607595576052
1706	0	0	-0.0672828954127821
1707	0	0	0.297822508468605
1709	0	0	0.0357609604714628
1710	0	0	0.103695262970528
1711	0	0	0.129045856860062
1712	0	0	0.0668375888247181
1713	0	0	0.193259792813732
1715	0	0	0.131337366246013
1716	0	0	-0.0699471965754207
1717	0	0	0.0889082963184125
1718	0	0	-0.0295882623564463
1719	0	0	0.247908920349557
1720	0	0	0.194189635339965
1721	0	0	0.267566189072182
1723	0	0	-0.0982979974888065
1726	0	0	0.276415411518202
1727	0	0	0.11375953659766
1728	0	0	0.0925069719869242
1729	0	0	0.113750950592044
1730	0	0	0.157201982549344
1731	0	0	0.0087510921654262
1732	0	0	0.345369129836358
1733	0	0	0.0420573105146623
1734	0	0	0.104806450555819
1735	0	0	0.112361479559134
1736	0	0	0.119100627641736
1737	0	0	-0.0546217913893339
1738	0	0	-0.00439981685891939
1739	0	0	0.020855567324238
1740	0	0	0.00784000488453428
1741	0	0	-0.103666604163192
1742	0	0	0.416349258927697
1744	0	0	0.0665954320640263
1745	0	0	0.03888462323941
1746	0	0	0.134872007318973
1747	0	0	0.185705784693583
1748	0	0	0.259803844187889
1749	0	0	0.405531045517578
1750	0	0	0.290718188822214
1751	0	0	0.233730692312808
1752	1	0	0.576290229749068
1753	0	0	0.110304328142799
1754	0	0	0.203268797808072
1755	0	0	0.504737550237144
1757	0	0	-0.155079411059919
1759	1	0	0.359697437704884
1764	0	0	-0.0645722194960961
1765	0	0	0.161047570802274
1766	0	0	0.109931015713545
1767	0	0	0.363312546262872
1768	0	0	0.0724692487355189
1770	0	0	0.222464142247952
1771	0	0	0.236293487556619
1772	0	0	0.238495863328447
1773	1	0	0.38173893008156
1775	0	0	0.281658635916065
1776	0	0	0.0458391833138109
1777	0	0	0.314606588375109
1778	0	0	-0.0182278454030616
1779	0	0	0.193947344979956
1780	0	0	0.0589418553131497
1781	0	0	0.218779059089939
1782	0	0	0.0741982307632067
1783	0	0	0.309552589462604
1784	0	0	-0.00333331935490235
1785	0	0	0.153369221799086
1786	0	0	0.0366510075471115
1787	0	0	0.0817003186285056
1788	0	0	0.48075880207613
1789	0	0	0.1563291578871
1790	0	0	-0.0907772128058173
1791	0	0	0.181229391196692
1792	0	0	0.231866716738384
1793	0	0	0.11020502476186
1794	0	0	-0.0731720037166172
1795	0	0	0.197635346875553
1796	0	0	-0.0250355828755872
1797	0	0	0.144076009532997
1798	0	0	0.125325706979591
1799	0	0	0.028034336191675
1800	0	0	0.263898591728439
1801	0	0	-0.0580210922759203
1802	1	0	0.239613680523163
1803	0	0	0.179571801932302
1804	1	0	0.554633243709535
1805	0	0	0.221196002983039
1806	1	0	0.29821455824614
1807	1	0	0.359697437704884
1808	1	0	0.454329073897235
1809	0	0	0.154887839037919
1810	0	0	0.121959534755165
1812	1	0	0.347689061986712
1813	1	0	0.281642995536765
1815	0	0	0.299655559114023
1819	0	0	0.257623088120441
1820	0	0	0.198825031396176
1821	0	0	0.0878061056434379
1822	0	0	0.0888008750246834
1823	0	0	0.111146761270389
1824	0	0	0.258239095746404
1825	0	0	0.0569498510099229
1826	0	0	0.211915377846634
1827	0	0	0.183912593574365
1828	0	0	0.234854659581414
1829	0	0	-0.0374400319376979
1830	0	0	-0.0907772128058173
1831	0	0	-0.118170000071182
1832	0	0	-0.0895385429226935
1833	0	0	0.362625328515879
1834	0	0	0.187931510615107
1835	0	0	0.177227389307037
1836	0	0	0.109959777511456
1837	0	0	0.0258919524506223
1838	0	0	0.227392189726486
1839	1	0	0.172427219412961
1841	0	0	0.0664362020183583
1842	0	0	0.0215378611578253
1843	0	0	0.187702630453125
1844	0	0	0.0940831844337589
1846	0	0	0.0692077762077055
1847	0	0	0.209028748223492
1848	0	0	0.341420039598401
1849	0	0	0.20764214659841
1850	0	0	0.0474419311518988
1852	0	0	0.0155150973516708
1853	0	0	0.0425101676413731
1854	0	0	-0.0626128459356239
1855	0	0	0.0678489799315272
1856	0	0	0.483193629024245
1857	0	0	0.262121293786036
1860	0	0	0.25361388934076
1861	0	0	0.0797402648653695
1862	0	0	0.155683770992072
1863	0	0	0.106400668797794
1864	0	0	0.0569963557780376
1865	0	0	0.0828088124874139
1866	0	0	0.293413249454184
1867	0	0	0.334670810293942
1868	0	0	0.220916432858119
1869	0	0	0.0038792236998665
1870	0	0	-0.221446166720271
1871	0	0	0.330090291869336
1872	0	0	0.347020334442983
1873	0	0	0.195462720529585
1875	0	0	-0.163712663527786
1876	0	0	0.205418267723454
1877	0	0	0.124615575795582
1878	0	0	0.106532610202478
1879	1	0	0.26928438290008
1880	1	0	0.330122291567302
1881	1	0	0.264823601301735
1882	0	0	0.113884886076771
1883	0	0	0.20889235863515
1885	0	0	0.179495517885981
1886	1	0	0.430730767710926
1887	1	0	0.836845262152329
1888	0	0	0.274964821309768
1889	0	0	-0.074931047577653
1891	0	0	0.310585577945563
1892	0	0	0.189552818763051
1893	0	0	-0.0888943725719759
1894	1	0	0.590786151832246
1895	0	0	0.125334347086829
1896	0	0	-0.127179128296067
1897	0	0	0.299191625443863
1898	0	0	0.218973039973534
1899	0	0	0.100985969022772
1900	1	0	0.418830624058395
1901	1	0	0.525996966353039
1902	1	0	0.549722014315997
1904	0	0	0.1357233698924
1905	0	0	0.311109905938209
1906	0	0	0.266999865962301
1907	0	0	0.0779723898220412
1908	0	0	0.261203977506808
1909	0	0	0.11404632770775
1910	0	0	0.516419429861607
1911	1	0	0.274855144403073
1912	0	0	0.195377510129807
1913	0	0	0.338480983355109
1914	1	0	0.277276426636372
1915	1	0	0.671693963848092
1917	1	0	0.149550862636872
1919	1	0	0.152417516274665
1920	1	0	1.19099782038364
1921	1	0	0.449003624364544
1922	0	0	0.93717792943261
1923	1	0	0.311663934832196
1924	0	0	0.282456423534726
1925	0	0	0.325474706302333
1927	0	0	0.290935933509289
1929	0	0	0.0865592144315077
1930	0	0	0.021581956717039
1932	0	0	0.0787258546991241
1934	0	0	0.152436598274263
1935	0	0	0.0719662348679192
1936	0	0	0.0709395697310224
1937	0	0	-0.164546739768584
1938	0	0	0.272606193723903
1939	0	0	-0.0823748072236268
1940	0	0	0.122682600142159
1941	0	0	-0.127767808630458
1942	0	0	0.149664990088111
1943	0	0	-0.140617802716778
1944	0	0	0.102922734830291
1945	0	0	0.0835698580808491
1946	0	0	0.198974531415172
1947	0	0	0.447135246061066
1948	0	0	0.330570641692645
1949	0	0	0.209073990592308
1950	0	0	0.269509023821541
1951	0	0	0.0927158773977375
1952	0	0	0.0884262394591625
1953	0	0	0.184524508767202
1954	0	0	0.174237978664834
1955	0	0	0.278055256352947
1956	0	0	-0.204454290655214
1957	0	0	0.242589702363019
1958	0	0	0.27459054645028
1959	0	0	0.00961626176536751
1960	0	0	0.359922090893216
1961	0	0	0.183574315606984
1962	0	0	0.123082453394649
1963	0	0	0.135177653519081
1964	0	0	0.237660203467115
1965	0	0	0.498633001974116
1966	0	0	-0.0590472727222308
1967	0	0	0.175167981797023
1968	0	0	0.190611115872033
1969	0	0	0.196714287342953
1970	0	0	0.0752261515753584
1971	0	0	-0.0395526971930707
1972	1	0	0.68079892500359
1973	1	0	0.22208181079241
1974	1	0	0.251295388960201
1976	0	0	0.133317558994386
1977	0	0	0.1035709147158
1978	1	0	0.226432022139084
1979	0	0	0.0464738918267483
1980	0	0	0.230572794743273
1981	0	0	0.116279420894864
1982	1	0	0.468030203259273
1983	1	0	1.07112999528473
1984	1	0	0.485740930144903
1985	0	0	-0.034890468243117
1986	1	0	0.320310825130156
1987	0	0	0.14156037289333
1988	0	0	0.389445277087473
1989	0	0	-0.0107646534255054
1990	0	0	-0.0989688667368324
1995	0	0	0.122725359832294
1996	0	0	0.23605870703994
1997	0	0	0.268932435518381
1998	0	0	0.268506423354158
1999	0	0	0.268906789717783
2000	0	0	0.489320706880287
2002	0	0	0.283938602255867
2003	0	0	0.275365404932615
2004	0	0	0.175958982072206
2006	0	0	0.161800172546567
2007	0	0	0.283696497991375
2008	0	0	0.269350825097623
2009	0	0	0.339856070429169
2010	0	0	0.209592741227732
2011	0	0	0.341684874127626
2013	0	0	0.311663934832196
2014	0	0	0.33568068626854
2020	0	0	0.225059350636964
2021	0	0	0.0848951671700722
2023	0	0	0.365151145915417
2024	0	0	0.234846665384095
2025	0	0	0.186667852525412
2026	1	0	0.202260166091569
2027	0	0	0.49742389650648
2028	0	0	0.122936124065141
2029	0	0	0.0722190602113448
2030	0	0	0.255236924454167
2031	1	0	0.847665927197905
2032	0	0	0.308669028589374
2033	1	0	0.332170796965823
2036	0	0	0.160915529672112
2037	0	0	-0.144169368236284
2038	0	0	0.180283819701711
2039	0	0	0.0630532438932403
2040	0	0	0.479338293886752
2044	0	0	0.105843139471193
2045	0	0	0.206649691066554
2046	0	0	0.102407715402878
2048	0	0	0.28087933784289
2049	1	0	0.559792184866362
2050	0	0	0.647615909233805
2052	0	0	0.0960383213997406
2053	1	0	0.301919919929847
2055	0	0	0.230897857260056
2056	0	0	0.248869375164209
2058	0	0	0.387349662811929
2061	0	0	0.242699868730258
2062	1	0	0.267990081694716
2063	0	0	0.334986556944633
2064	0	0	0.315381185389759
2065	0	0	0.298481174573118
2066	0	0	0.957044730422374
2067	0	0	0.312216477622239
2068	0	0	-0.0180021958096899
2069	0	0	0.0840647839534058
2070	0	0	0.318124343297295
2071	0	0	0.274923129728894
2072	0	0	0.079349997236372
2073	0	0	0.0625723669036064
2074	1	0	0.776441107607433
2076	1	0	0.53198697038966
2079	0	0	0.390131187170448
2080	0	0	0.268535262243157
2082	0	0	-0.0171676867866812
2083	0	0	0.306980613907177
2084	0	0	0.312557890199522
2085	0	0	0.272170400074232
2087	0	0	-0.0989133982609095
2088	0	0	0.163209335639471
2089	1	0	0.602459067844788
2090	0	0	0.211693874734383
2091	0	0	0.0796867956458623
2092	0	0	0.108933247420999
2098	0	0	0.210618257306903
2101	0	0	0.523622915440664
2103	0	0	0.294001020025078
2104	0	0	0.372972930296658
2105	0	0	0.293651371254937
2107	0	0	0.397956705739572
2109	0	0	0.42635003598798
2110	0	0	0.343801646085306
2111	1	0	0.333390702654068
2113	1	0	0.383714189141228
2114	1	0	0.485908950887318
2115	1	0	0.307475966100106
2116	1	0	0.389374280111797
2118	1	0	0.326397024949915
2120	1	0	0.559656278793221
2121	1	0	0.293651371254937
2124	0	0	0.0463647324419673
2125	0	0	0.138129898387244
2126	0	0	0.30545778777228
2127	0	0	0.190927604688429
2129	0	0	0.172977277521044
2130	0	0	0.323672310550368
2131	0	0	0.257123657222997
2132	0	0	0.16756342621413
2133	0	0	0.303026354456053
2134	0	0	0.116228410314181
2135	0	0	0.191009329934283
2136	0	0	0.137542486918699
2137	1	0	0.531441157374181
2138	0	0	0.221601116945905
2139	0	0	0.353693249845798
2140	0	0	0.201230501051642
2141	0	0	0.262541516204356
2142	0	0	0.299655559114023
2143	0	0	0.350868759188755
2147	0	0	0.207014773164981
2148	0	0	0.223789461405779
2150	0	0	0.191580177650474
2151	0	0	0.309196627106631
2153	0	0	0.317668122691282
2154	0	0	0.405193641202213
2155	0	0	0.196530923311775
2157	0	0	0.305659746973109
2159	0	0	0.299655559114023
2164	0	0	0.287647183395851
2165	0	0	0.161913503623471
2168	0	0	0.190947016586368
2171	0	0	0.33568068626854
2172	0	0	0.329676498409454
2174	1	0	0.265436678557827
2176	0	0	0.347689061986712
2177	0	0	0.091433583241792
2179	0	0	0.33568068626854
2183	0	0	0.164965049088185
2184	1	0	0.151494366758231
2185	1	0	0.383474216689126
2186	0	0	0.101941531363466
2187	0	0	0.153232806290093
2188	0	0	0.372196761431853
2189	1	0	0.533192570133271
2190	1	0	0.25068177288512
2191	0	0	-0.0328133308662856
2192	0	0	0.334562720168825
2193	0	0	0.161718856418992
2194	0	0	0.207267790035601
2196	0	0	0.1905277298391
2197	0	0	-0.14764772676927
2199	0	0	0.116046686042155
2200	0	0	0.279167336677302
2201	0	0	0.017211563041829
2202	0	0	0.041354160357892
2203	0	0	-0.100901674414843
2204	1	0	0.927378301867987
2205	0	0	0.0260055038655762
2206	1	0	0.49533279962267
2208	0	0	0.0301723440433022
2209	1	0	0.212778014304555
2210	1	0	0.253396251649261
2211	0	0	0.112974002650585
2212	0	0	0.0635877940251256
2213	0	0	-0.0783061311337426
2214	1	0	0.0635574803145777
2215	1	0	0.372226326404261
2216	0	0	0.158194905096253
2217	0	0	0.094876956565151
2218	1	0	0.362176769359235
2220	0	0	0.221247343728996
2221	0	0	0.401569022119314
2222	0	0	0.037857830989328
2223	1	0	0.225996380574517
2224	1	0	0.47917806879984
2225	0	0	0.298642316862065
2226	0	0	0.348030272637078
2227	0	0	0.164017436701142
2228	1	0	0.342192470029189
2229	0	0	0.167093167257842
2230	0	0	0.147624614079484
2231	1	0	0.501347463651821
2232	1	0	0.708775366912098
2233	1	0	0.341363087634625
2234	0	0	-0.0107444051157856
2235	1	0	0.0542797553223655
2236	0	0	0.153320969059683
2237	0	0	0.135887345661243
2238	1	0	0.0971192982695618
2239	0	0	-0.00894010384693027
2241	1	0	0.285729184113763
2242	1	0	0.457886572326746
2243	0	0	0.0464940714415471
2244	0	0	0.187449194292783
2245	0	0	0.0495531753701834
2246	0	0	0.0884208698221303
2247	1	0	0.324090454063568
2248	0	0	0.135812675140244
2249	0	0	0.211513677123087
2250	0	0	0.205353707196742
2251	0	0	0.0559047428913047
2252	1	0	0.808089317181331
2253	0	0	0.2694662788794
2254	1	0	0.160252421288639
2255	0	0	0.164292930290762
2256	0	0	-0.0883806869029471
2257	1	0	1.51271246526502
2258	0	0	0.177942139272773
2259	0	0	0.152855299553318
2260	1	0	0.588572022632388
2261	0	0	0.194105469924416
2262	0	0	0.0414394299232251
2263	0	0	0.0917716117536222
2264	0	0	0.0667348129640538
2265	0	0	0.0879604721043696
2266	0	0	0.0721164542031237
2267	0	0	0.106998440096467
2268	0	0	0.300888818519797
2269	1	0	0.261004759458379
2270	0	0	0.133422120080407
2273	0	0	0.227380505794684
2274	0	0	0.364693233931368
2275	1	0	0.311749114076909
2276	1	0	0.128760267603298
2277	1	0	0.440298464150949
2279	1	0	0.310343450366613
2280	0	0	0.247946250134119
2281	1	0	0.329093513070298
2282	1	0	0.551935668661044
2283	0	0	0.537947469008259
2284	1	0	0.211662566013725
2285	1	0	0.25863435705027
2287	1	0	0.278828876533646
2288	1	0	0.352971099148059
2289	1	0	0.247114515123214
2290	1	0	0.427797538045225
2291	0	0	0.38417357861675
2292	1	0	0.33491105456443
2293	1	0	0.276694922681286
2294	1	0	0.324596243122657
2295	0	0	0.407317625780593
2296	1	0	0.309064487661287
2298	1	0	0.347024112461281
2299	0	0	0.226097466565866
2300	1	0	0.296043624734027
2301	1	0	0.640146363054105
2302	0	0	0.299917251767369
2303	0	0	0.453435197567505
2304	1	0	0.319132420952463
2305	1	0	0.30215839194605
2306	0	0	0.209496149986043
2307	0	0	0.30608165938435
2308	0	0	0.338584182745702
2309	1	0	0.104518637851576
2310	0	0	0.489083374972905
2312	1	0	0.352544803704286
2313	1	0	0.430908640942839
2314	1	0	0.229775518981719
2315	1	0	0.322932512727948
2316	1	0	0.362148567235117
2317	1	0	0.275601616618226
2318	0	0	0.566329890601039
2319	0	0	0.482174441899569
2320	0	0	-0.0285453216893271
2321	1	0	0.274408976055176
2322	0	0	0.356234087697071
2323	1	0	0.176032649189871
2324	0	0	0.247805537514479
2325	0	0	0.280860872617296
2327	0	0	0.138163951325118
2328	1	0	0.343542831442055
2330	0	0	0.341684874127626
2333	0	0	0.311663934832196
2335	0	0	0.203626427347196
2337	0	0	0.22760530480499
2339	0	0	0.353693249845798
2340	1	0	0.22760530480499
2342	0	0	0.0753208029523505
2345	0	0	0.318620355150865
2346	0	0	0.227867737846688
2347	0	0	0.278678018064375
2348	1	0	0.156232090722902
2349	0	0	0.137377796403184
2351	0	0	0.261324063133164
2352	0	0	0.154685686441257
2353	0	0	0.243290854759654
2354	0	0	0.107037251789951
2355	1	0	0.385345947285463
2356	0	0	0.192208253678574
2357	0	0	0.305863620712577
2359	0	0	0.245143099421122
2360	0	0	0.0107599412158038
2361	0	0	0.300458810255353
2362	0	0	0.0920617334499872
2363	0	0	0.0163590462842178
2365	0	0	-0.0662211319312271
2367	0	0	-0.122853564601494
2368	0	0	0.205725354220908
2370	0	0	0.162657922830728
2371	0	0	0.191554109216088
2372	0	0	0.439066497614573
2373	0	0	0.136710911866718
2374	0	0	0.235657003771825
2375	0	0	0.268082181760214
2376	0	0	0.0342540710113244
2377	0	0	0.0981300166412091
2378	1	0	0.401664945477416
2379	0	0	0.180755435545622
2381	0	0	0.136607276610225
2383	0	0	0.334157713142788
2387	0	0	0.270100461131085
2391	0	0	0.199655539835716
2392	1	0	0.394513653640321
2393	0	0	0.514609589263286
2394	1	0	0.347631804459539
2395	0	0	0.255074683406561
2397	0	0	0.31989017433531
2398	0	0	0.139540322504489
2399	1	0	0.285134357036297
2400	0	0	-0.0569881267141183
2401	0	0	-0.0373103090794712
2403	0	0	0.10303012222181
2404	0	0	0.223361189101017
2405	0	0	0.117953230180888
2406	0	0	0.203389616295294
2407	0	0	0.130611567315755
2408	0	0	0.25540418353485
2409	0	0	0.23470327846655
2410	0	0	0.0562530825184455
2412	1	0	0.270784653857353
2413	1	0	0.298516916729833
2414	0	0	0.0279139505461773
2415	0	0	0.315980510725594
2416	0	0	0.088344319918857
2417	0	0	0.192723436859221
2418	0	0	0.375060880954842
2419	1	0	0.550761341673222
2420	1	0	0.867054492526488
2421	0	0	-0.0597520847853062
2422	1	0	0.387144723900634
2424	0	0	0.0572692439232821
2425	0	0	0.294321928649958
2426	1	0	0.424784715831546
2427	1	0	0.381807418537736
2428	0	0	0.325170665784264
2429	1	0	0.531496091678926
2430	0	0	0.465135227355156
2433	1	0	0.458227474964756
2435	1	0	0.867054492526488
2436	0	0	0.458234067571129
2437	0	0	0.331229179226766
2438	1	0	0.348514256072429
2442	0	0	0.497393144207463
2443	0	0	0.364528826650547
2444	1	0	0.670892583672685
2445	0	0	-0.0790014479596962
2446	0	0	0.240969698359659
2447	0	0	0.357868793062027
2448	0	0	0.192307415093848
2450	0	0	0.45723689879146
2452	0	0	0.379207710778509
2453	0	0	0.453388582908839
2455	0	0	0.611658740405436
2457	0	0	0.138440881989059
2458	0	0	0.167760457925244
2459	0	0	0.382704047805839
2460	0	0	0.134402327592663
2462	0	0	0.279598225363838
2463	0	0	0.0110409660137615
2467	0	0	0.310520561681907
2471	1	0	0.38415393490206
2473	1	0	0.281031054333156
2475	1	0	0.236134336880034
2477	1	0	0.391228097737618
2479	1	0	0.364547583606971
2480	1	0	0.219984677590757
2481	1	0	0.449608419265153
2482	1	0	0.535843279187933
2483	1	0	0.634325279188243
2484	1	0	0.428002383069302
2485	1	0	0.526206970847064
2486	1	0	0.316840849913491
2487	0	0	0.222031062077813
2490	0	0	0.00442357109179961
2492	0	0	0.245093745025289
2493	0	0	0.262957200279225
2495	0	0	0.0929426823813896
2500	0	0	0.259847337232838
2503	0	0	0.135858835496352
2504	1	0	0.306149399187706
2506	0	0	0.203352678438472
2509	0	0	0.210110351318336
2510	0	0	0.232111301823585
2512	0	0	0.227071271428445
2516	0	0	0.117038167488967
2517	0	0	-0.0965498842819182
2519	0	0	0.0432354548471164
2521	0	0	0.274200062126399
2522	0	0	-0.0102712061655899
2524	1	0	0.223570069004284
2525	1	0	0.285368348306238
2526	0	0	0.23177862475054
2528	0	0	0.216907050402742
2529	0	0	0.30071692163546
2530	1	0	0.941540625100115
2531	0	0	0.132983886156178
2532	0	0	-0.113885477110359
2534	0	0	0.13343863025985
2535	0	0	0.12952848460416
2536	0	0	0.135977823331513
2537	0	0	-0.0518886836475921
2538	0	0	0.256648175123958
2539	0	0	0.039672181421449
2540	1	0	0.408507404169303
2541	0	0	-0.0777573509377094
2542	0	0	0.0834058026436458
2543	0	0	-0.0752454389236279
2546	1	0	0.34453620899811
2547	0	0	0.185658997163813
2548	0	0	0.287727562814818
2549	1	0	0.527147848635789
2550	1	0	0.402332691660977
2552	1	0	0.50465818987286
2553	1	0	0.183323005485118
2557	1	0	0.782103603166024
2558	0	0	-0.0194326079050118
2559	0	0	-0.155207643514648
2560	1	0	0.535679421366325
2561	1	0	0.225962366561295
2562	0	0	0.132608102495117
2563	0	0	0.0120121373641254
2564	0	0	-0.0169741279819243
2565	0	0	-0.0297872270809438
2566	0	0	0.00686544990140889
2567	1	0	0.394123337748654
2568	1	0	0.293806990370657
2569	0	0	0.172613519960805
2570	0	0	0.265411706924651
2571	0	0	0.10073677506638
2572	0	0	0.0233074421794044
2573	0	0	-0.0508207643074499
2575	1	0	0.457540003855808
2576	0	0	0.0852784744551272
2577	0	0	0.216306121391201
2578	0	0	0.246262677448879
2579	0	0	0.280401170162393
2580	0	0	0.81901028615888
2581	0	0	0.00903844564361756
2582	0	0	0.017185199839329
2583	0	0	-0.0156673301811822
2584	1	0	0.482281136895256
2585	0	0	0.338428782916253
2586	0	0	0.0107548769630813
2587	0	0	0.154118729429925
2588	0	0	0.0468888315306367
2589	0	0	0.170290210349027
2590	0	0	0.0161413807631448
2591	0	0	0.262200388573244
2592	0	0	0.165229492283705
2593	0	0	0.222082744166707
2594	1	0	0.374914941221536
2595	0	0	0.166207669544041
2596	0	0	0.140220145741723
2597	0	0	-0.0654573978361704
2598	0	0	0.312455628753199
2599	0	0	0.0487239801463222
2600	0	0	0.16500485403776
2601	0	0	0.36149228082188
2602	0	0	-0.0262990267705334
2603	0	0	0.00516998297736548
2604	0	0	0.285094508354069
2605	1	0	0.413511524168154
2606	0	0	0.309176959667215
2607	1	0	0.43286388658434
2608	0	0	0.198512519682476
2609	0	0	-0.0273330525765395
2610	0	0	0.0663325386310467
2611	1	0	0.536503249385678
2612	0	0	0.0581901179618049
2613	0	0	0.297713730987471
2614	1	0	0.225178374667553
2615	0	0	0.124568375201242
2620	0	0	0.0867898045666694
2623	1	0	0.562613903123428
2624	0	0	0.705179113957661
2626	0	0	0.0580315464607436
2628	0	0	0.116024896029061
2632	0	0	0.139995183983457
2633	0	0	0.363752797866809
2634	0	0	0.165237204205197
2635	0	0	0.146208624218951
2636	0	0	0.242454800237463
2641	0	0	0.275180516567938
2642	0	0	0.0392444689329199
2644	1	0	0.528741655413408
2646	0	0	0.177585970069441
2647	0	0	0.0368957839951163
2652	0	0	0.17983494468412
2653	0	0	0.20974090200946
2656	1	0	0.302732315792099
2658	0	0	0.28772599264913
2659	0	0	-0.0844696910573469
2660	0	0	0.104812414059871
2661	0	0	0.0806527992744611
2662	1	0	0.689439482449201
2663	0	0	0.368609544493769
2664	0	0	0.0592373218848932
2665	0	0	0.228006284247552
2667	0	0	0.272372945808203
2668	0	0	0.249200801369549
2669	0	0	0.796196477338778
2670	0	0	0.525568437873026
2672	0	0	0.230197375773817
2673	0	0	-0.0802694675723438
2676	0	0	0.382833602579191
2677	0	0	0.294888562715503
2678	0	0	-0.00991574722935637
2679	0	0	0.317949846841404
2681	0	0	0.177415812352618
2682	0	0	0.234635309651628
2683	0	0	0.15875025011513
2685	0	0	0.280417909347631
2686	0	0	0.348780153107538
2687	0	0	0.254774580755112
2688	1	0	0.620102263262862
2690	1	0	0.302715185395891
2691	0	0	-0.0016731255578617
2693	0	0	0.0780163885166662
2695	0	0	0.229024315984159
2696	0	0	0.315249969997967
2698	0	0	0.245867493783024
2699	0	0	0.255589875702017
2700	0	0	0.156307949015836
2704	0	0	-0.253393225626523
2707	0	0	0.223105228859188
2709	0	0	0.185884821236153
2710	0	0	0.38121249637685
2711	0	0	-0.210700408908292
2715	0	0	0.257626244100421
2719	0	0	0.136273049735976
2721	0	0	0.315192399702662
2722	0	0	0.436749677701643
2723	0	0	0.181667036954994
2724	0	0	0.235674657189167
2725	0	0	0.365003036860473
2726	0	0	0.125949727158949
2727	0	0	0.031047529491671
2728	0	0	0.380885709195966
2729	0	0	0.217141466766496
2730	0	0	0.137219397028394
2731	0	0	-0.00385347219148182
2732	1	0	0.336617475884236
2733	1	0	0.564321645531282
2734	1	0	0.992467092402238
2735	0	0	0.13695965945626
2736	0	0	0.0216407521096054
2737	0	0	0.282075358645817
2738	0	0	0.425932140843298
2739	0	0	0.252502659265727
2740	0	0	0.239760922873681
2741	0	0	0.36675088310838
2743	0	0	0.108695428437602
2744	0	0	0.0345820772392724
2745	0	0	0.182237031931442
2746	0	0	0.166530116174907
[truncated: 28,794 more rows]
