# Supplementary material for: Development and evaluation of a machine learning-based in-hospital COVID-19 disease outcome predictor (CODOP): A multicontinental retrospective study
Source: eLife. 2022 May 17;11:e75985. doi: 10.7554/eLife.75985 (PMC9129872; doi:10.7554/eLife.75985)
Supplement: Figure 4—source data 1. [file elife-75985-fig4-data1.xlsx]

## Sheet: Klen etal_Figure 4-source data 
outcome	Days at hospital	CODOP
0	0	0.728198016255674
1	0	0.401199799226549
0	0	0.173239878247039
0	0	0.099778873634316
0	0	0.371883909022225
0	0	0.0968722476066654
0	0	0.0923234624741418
0	0	0.0888844338926643
0	0	0.675081315847369
0	0	0.124344192965475
0	0	0.225520878210614
0	0	0.49700740953085
0	0	0.23664572296058
0	0	-0.0683544219594449
0	0	0.21341766044834
0	0	0.202699182106096
0	0	0.253341119545671
1	0	0.535455184561585
1	0	0.345428817236391
0	0	0.266632969827721
0	0	-0.155649969028682
0	0	0.411102752823221
0	0	0.367762611435662
1	0	0.26207302921304
0	0	0.279751913088069
0	0	0.350682058633535
0	0	0.29146901671025
0	0	0.334970496004482
0	0	0.143850265067952
1	0	0.460693225078781
1	0	0.194773277879501
0	0	-0.135204453249679
0	0	-0.13391634858095
0	0	0.283851737637088
1	0	0.465842372837318
0	0	0.0181843818841193
0	0	0.380268723044777
1	0	0.265815818334411
0	0	-0.102672934048788
0	0	0.233341924803974
1	0	0.363935570063421
0	0	0.339873853500575
0	0	0.245319617640443
0	0	0.0478427432892098
0	0	0.206336472834969
0	0	0.123054932556301
0	0	0.182304058242537
1	0	0.388040933084793
1	0	0.510026670710512
1	0	0.441643612575778
0	0	0.0734748051669776
0	0	0.0592380409620755
0	0	0.0755206356952954
0	0	0.0686221353056247
1	0	0.407080149068344
0	0	-0.0133539826768834
0	0	0.27706145212788
1	0	0.34565846681858
0	0	0.110381927979873
0	0	0.203674182830675
0	0	0.111218990571575
0	0	0.179048963872813
0	0	0.326887280481027
0	0	0.096169649284878
1	0	0.272499033041534
0	0	0.375035419381295
0	0	0.28134711573261
0	0	0.156505931695718
0	0	0.143725858448765
0	0	0.513390233149182
0	0	0.283342751077474
0	0	0.240554614417923
0	0	0.260950500300973
0	0	0.327639731957827
0	0	0.06680102714476
0	0	0.170799338606374
0	0	0.224244061569875
0	0	-0.0407691756260175
1	0	0.15257900541086
1	0	0.364160891964661
0	0	0.134022122104914
1	0	0.22929906923252
1	0	0.517452616309083
0	0	0.0931391240074536
0	0	0.0213282230362264
0	0	0.437569749613113
0	0	0.0921610673309218
1	0	0.536626799282382
0	0	-0.0754550770619078
0	0	0.0401391713806286
0	0	0.386664205595546
0	0	0.241165052323918
1	0	0.107570434072495
0	0	-0.0615480698230213
0	0	-0.0491487336919039
1	0	0.453773282418038
1	0	0.312827279574378
0	0	0.245842197050356
0	0	0.0456887799088882
0	0	0.340238351692172
0	0	0.185356203287928
0	0	0.0877731866649563
0	0	0.0459236661978413
0	0	0.183133598590064
0	0	0.161145330431172
0	0	0.140037970618062
0	0	0.142172750640737
0	0	0.106343343106838
0	0	0.386221267664474
0	0	0.598081607256628
0	0	-0.0730860444504896
0	0	-0.0322065274311577
0	0	0.450133734789927
0	0	0.130520904761179
0	0	0.283465919197437
0	0	0.34575501642241
0	0	0.340985520356532
0	0	0.163342099233476
1	0	0.355413988242265
0	0	-0.156664078438021
0	0	0.31772858866992
0	0	0.306941426575609
0	0	0.215287387562415
0	0	-0.0267260784467305
1	0	0.409558522883404
0	0	0.272179154555478
1	0	0.723093879347364
0	0	0.441702759491933
0	0	0.234601045200218
1	0	0.304014369567026
0	0	0.228072509895932
1	0	0.23437170904858
0	0	0.578294028394945
0	0	0.0295665830127744
0	0	0.325245322642621
0	0	0.156827088948608
0	0	-0.0536335176248224
1	0	0.100709363011026
0	0	0.112766970414335
0	0	-0.0435177016442397
0	0	0.246167529575445
0	0	0.333968896134621
0	0	0.137544428021158
0	0	-0.0435177016442397
0	0	0.695003454845761
0	0	0.0232533197769241
0	0	0.0486390643223812
0	0	0.0599827365681036
0	0	0.068875283649826
0	0	0.000329593217329505
0	0	0.196882984808402
0	0	0.130992708281329
1	0	0.264907128171007
0	0	0.000911805781999394
0	0	0.203201479594734
0	0	0.195155072524347
0	0	0.187021700718438
0	0	0.052981708605528
0	0	0.067569240220254
0	0	0.210862777691408
0	0	0.0929132380356396
1	0	0.237970237260882
1	0	0.421587834506607
0	0	0.186369449768165
0	0	-0.00280982261388478
1	0	0.188009411077664
1	0	0.501850834509732
0	0	0.150105144052794
0	0	0.207580585646765
0	0	0.375120349321381
0	0	0.584968452300279
0	0	0.157245723998993
0	0	-0.028878526241525
0	0	0.396986030870704
0	0	0.237622453636508
0	0	0.369350916295488
0	0	0.0641766539083391
1	0	0.281175977454504
0	0	0.159109497498881
0	0	-0.10779967760521
0	0	0.0237556825413653
0	0	0.0174118307429789
0	0	0.314333700396826
0	0	-0.040772943516069
0	0	0.230188902700974
0	0	0.283582939649965
0	0	0.246666709843601
0	0	0.369401645786305
0	0	0.127984354042881
0	0	0.385104327364245
0	0	0.142221299471311
0	0	-0.0989093375095046
0	0	-0.0250872609264105
0	0	0.480104360298747
1	0	0.767163583517279
0	0	-0.00390917848376217
1	0	0.542772966954384
1	0	0.383422921931822
0	0	0.365035671490479
0	0	0.0792104748488111
1	0	0.5350150856696
0	0	0.228634718036614
0	0	0.362750247356841
0	0	0.0404481364155765
0	0	0.371177596090201
0	0	0.234766926394854
0	0	0.136510155629293
0	0	0.224176196626141
1	0	0.502211552425686
0	0	-0.0834679177054933
1	0	0.658760474143298
1	0	0.388763077282674
0	0	0.00982208930121958
0	0	0.358513916731137
0	0	0.240610973062533
0	0	0.199781441411257
1	0	0.595268938354496
0	0	0.403669458752797
0	0	0.119467681993219
0	0	0.043265121508672
0	0	-0.122016299131456
0	0	0.488372460606647
0	0	0.246420318701793
0	0	0.260088073136579
0	0	0.0960012421595727
0	0	0.342962416070692
0	0	0.00154061084373679
0	0	0.0856986756245628
0	0	0.136791208155793
0	0	0.122180002636955
0	0	0.280374379874893
0	0	0.0119506276215908
0	0	0.340933252451321
1	0	0.631510228656939
0	0	0.125953206912284
0	0	-0.0387477905350294
0	0	-0.184203863462424
0	0	0.141756680457282
0	0	0.285592063279606
0	0	0.583607514655689
0	0	-0.0973831357754881
0	0	0.310153688305745
0	0	0.142159522482965
1	0	0.188080652291894
0	0	0.620687571046985
1	0	0.381481781397359
0	0	0.145987959284656
0	0	0.232841832761882
0	0	0.463748101094369
0	0	0.416481617657467
0	0	0.12154043464501
0	0	-0.171267903510673
0	0	0.216722577197744
0	0	-0.0497842971243827
0	0	0.239137042639906
1	0	0.474826835182872
0	0	0.21425559425196
0	0	0.0870382516222841
0	0	0.179062135337055
0	0	0.383216407952852
0	0	0.285654562851569
0	0	0.0683844875080864
0	0	0.015284511782571
0	0	0.294667461706668
0	0	0.261796902528901
0	0	0.113872087137951
0	0	0.107599353824696
0	0	0.00670430602248196
1	0	0.437355980402191
1	0	0.180715851259495
1	0	0.247644023688491
0	0	0.300345685596475
0	0	0.108859697262706
0	0	0.140028663835117
0	0	0.109032691886234
0	0	0.286657971930025
0	0	-0.0168947864470249
1	0	0.714396131340542
0	0	0.117795149227958
0	0	0.363240200761442
0	0	-0.00795615036560886
1	0	0.338505256384546
0	0	0.152342491131516
0	0	0.0786904610730582
0	0	-0.030026679467832
0	0	0.240545163302531
0	0	0.281162076297578
0	0	0.140028663835117
0	0	0.0389873603155162
1	0	0.557223334940306
0	0	0.0894305585580821
1	0	0.401715693964912
0	0	0.110902114594342
0	0	0.201935198547384
0	0	0.322580355742147
0	0	0.139674277555181
1	0	0.343573627623155
0	0	-0.0140118503804313
0	0	0.10513817073035
0	0	-0.0725822458839916
0	0	0.0366448667235926
0	0	-0.159206899797281
0	0	0.215421308019421
0	0	0.140560463905803
0	0	0.432731375212877
0	0	-0.018380146772725
0	0	0.170231248717154
1	0	0.759508851215319
0	0	0.103735524372319
1	0	0.321077409553341
0	0	0.359206552437744
1	0	0.705773620786363
0	0	0.116801635525071
0	0	0.00128026449111287
0	0	0.333097866441086
0	0	0.233072468426484
0	0	0.349831304113461
0	0	0.381493789477703
0	0	0.406766428399915
1	0	0.326919457704165
0	0	0.499300393292437
0	0	0.254440476838249
0	0	0.183843520541089
1	0	0.316133207117688
0	0	0.188582806620579
0	0	0.111031938375931
1	0	0.27242424687654
0	0	0.0892051007677285
0	0	0.480827314819595
0	0	0.105971536623796
0	0	-0.00375959366861347
0	0	0.246585484438889
1	0	0.355443692560074
0	0	0.199644341156806
0	0	0.242825602459639
0	0	0.267429540914677
0	0	0.284189354962304
0	0	0.285604318236409
1	0	0.49506328900251
0	0	0.0796395623859993
0	0	0.278657452950828
0	0	0.113790146331414
0	0	0.49214556063783
0	0	0.350366607561352
0	0	0.107902830146965
0	0	-0.0517084520983678
0	0	0.194805109528672
0	0	0.0223924895355371
0	0	0.222057820611892
1	0	0.579932348750516
0	0	0.241179281099444
0	0	0.157332255064217
0	0	0.377275369198546
0	0	0.451811335082043
0	0	0.210194721233922
0	0	0.507214410063747
0	0	0.225717111663355
0	0	-0.0346959888547007
1	0	0.386045786072039
0	0	0.13902265579364
0	0	0.198494152001426
0	0	0.398332305807673
0	0	0.200590226020269
0	0	0.244130556072197
0	0	0.217670897655354
1	0	0.295135278534093
0	0	0.381170952400156
1	0	0.353560004505609
0	0	0.145744181822348
1	0	0.394356147751455
0	0	0.492997782107728
0	0	-0.10036932891296
0	0	0.178667326081657
0	0	0.236430499305773
0	0	0.231943946942219
0	0	0.428954040919381
0	0	0.215830487704809
1	0	0.423437873017533
0	0	0.321752890363051
0	0	0.291104524333963
0	0	0.251865444132923
0	0	0.505726116289433
0	0	0.125909115298457
0	0	0.147856438507892
0	0	0.241360564049169
0	0	0.136200992269074
0	0	0.125888532863104
1	0	0.597806992821907
0	0	0.0595793657544153
0	0	0.269649807344045
0	0	0.203726732933353
1	0	0.233945646507173
1	0	0.739431892353204
0	0	0.0736608331529715
1	0	0.251820090986029
0	0	0.296184429607742
0	0	0.382798479622148
0	0	0.0689401744590294
0	0	0.161101733702385
0	0	0.765405309503141
0	0	0.30300683353907
0	0	0.182662601523376
0	0	0.310722729845627
1	0	0.173179960177948
0	0	0.208004767142161
0	0	0.0365422761923146
0	0	0.169865379429148
1	0	0.410587701213007
0	0	0.189634612003377
0	0	0.263004399734064
0	0	0.369440698777916
1	0	0.753151555203693
1	0	0.771518066001608
0	0	0.163201101327734
0	0	0.153275695642028
1	0	0.561667487753354
1	0	1.25123778109366
0	0	0.155797360827347
0	0	0.382950412950532
0	0	-0.0630391841622129
1	0	0.294628776975591
1	0	0.333683262924283
0	0	0.291785466371024
0	0	0.230748880538689
0	0	0.211682747659933
1	0	0.423361023358395
0	0	0.196871326020439
0	0	0.244739878145348
0	0	0.408498070311307
0	0	0.27353377018263
0	0	0.233807690840576
1	0	0.40084751588873
1	0	0.411920666134023
0	0	0.0366489061155722
0	0	0.255081615940602
0	0	0.320481246285735
1	0	0.471946245707585
0	0	0.303242077114802
1	0	0.419911783383365
0	0	0.214844830045022
1	0	0.392398460727743
1	0	0.34336114417591
0	0	0.306605851404938
0	0	0.345605295024735
0	0	0.247394421831733
0	0	0.404274801185305
0	0	-0.0843756947724696
0	0	0.222546617824906
0	0	0.114672779864921
0	0	0.367969507416017
0	0	0.274456940952838
1	0	0.577927511682785
0	0	0.0820540141407713
0	0	0.253180466463793
0	0	0.213521199342581
0	0	0.60038439435509
1	0	0.566727370482781
0	0	0.342539432719134
0	0	0.47159049522269
1	0	0.347455088114115
1	0	0.213780899162591
0	0	0.364272118964977
0	0	0.300608631525227
1	0	0.278623973766774
1	0	0.724485304570751
1	0	0.590367892413075
0	0	0.305890253096905
1	0	0.268433977413281
0	0	0.0276141203074042
1	0	0.441927702812406
0	0	0.079926581427656
0	0	0.0511363401883643
0	0	0.245385230054895
0	0	0.221045551629863
0	0	0.226844753814925
0	0	0.390128551270448
0	0	0.286871635041541
1	0	0.314697358836131
0	0	0.0393644596815125
1	0	0.572736549505978
0	0	0.10895318529177
0	0	0.0596827060134305
0	0	0.0687388474651182
0	0	0.158547637346413
1	0	0.576379851728838
0	0	0.0225492886018082
0	0	0.246764283776636
0	0	0.233507626661825
0	0	0.180961555460842
0	0	0.389346491329461
1	0	0.312717768792671
0	0	0.252452732376141
0	0	0.0756549638126347
1	0	0.571461550364251
0	0	0.262673878328896
0	0	0.253419661434177
0	0	0.180760340576241
0	0	0.107166541843458
0	0	0.137634436399081
0	0	0.169888332472091
1	0	0.288824384425397
0	0	0.332912803424206
0	0	0.436838995041447
1	0	0.296879100896019
0	0	0.175026364910175
0	0	0.180746616408889
0	0	0.330717946112281
0	0	0.408446369829143
1	0	0.433348225105058
1	0	0.244533766747746
1	0	0.416399685995912
0	0	0.057437892383981
1	0	0.363605812613271
0	0	0.0186187437896858
1	0	0.1304444561536
0	0	-0.0374064311469769
0	0	0.0716194961433041
0	0	0.216618339900561
0	0	0.107304546429102
0	0	0.209305723206077
0	0	0.298454835274633
1	0	0.334541176512449
0	0	-0.0225535889291295
0	0	0.0628665327511643
0	0	0.163544666775023
0	0	0.0930987471965424
0	0	0.201772446068544
0	0	0.299762184242337
0	0	0.190165268911588
0	0	0.21277803583982
1	0	0.236882131806323
0	0	0.143194228712679
0	0	0.0931611191035903
0	0	0.145486717894546
0	0	0.137354202839221
0	0	0.226324522195043
0	0	0.296089644976865
0	0	0.186581410048454
0	0	0.138519006913984
0	0	0.222433453827843
0	0	0.191846757084428
0	0	0.191842598359366
0	0	0.197466987564148
0	0	0.0736091383393568
1	0	0.367919072143089
1	0	0.268807311390418
0	0	0.215347038872141
0	0	0.0562985902925481
0	0	0.108903632869276
0	0	0.15855926895928
1	0	0.0536286979141198
0	0	0.0646096065704015
1	0	0.308988642817714
0	0	0.0552397301544608
0	0	0.230729872548419
1	0	0.238687045857708
1	0	0.293121032178442
1	0	0.206304350115698
1	0	0.296029979981126
0	0	0.240958908629635
0	0	0.107223033178909
0	0	0.0168666355235916
0	0	0.062853745246662
0	0	0.0750935248791483
1	0	0.449621650552432
1	0	0.388180374427781
1	0	0.374455049844437
0	0	-0.160690305156775
0	0	0.151645719875141
0	0	0.402004136993208
0	0	0.13553280510785
1	0	0.296492683492078
0	0	0.11460509479272
0	0	0.116103146949183
0	0	0.127264191195832
1	0	0.418609204037507
0	0	0.223335647506994
0	0	0.168050032587156
0	0	0.0960053805677652
0	0	0.380547180886667
0	0	0.0694826586306978
0	0	0.126279558810133
0	0	-0.0335593577506295
1	0	0.268588302904924
0	0	0.114913308376699
0	0	0.0298460259484343
0	0	0.30800253431004
0	0	0.109023453673131
0	0	0.134370722631979
0	0	0.198284059556244
0	0	0.0426779522120184
0	0	0.410367771394225
0	0	0.134370722631979
0	0	0.0920473036504313
0	0	0.416628728284579
1	0	0.352306256759939
0	0	-0.00276001708392686
0	0	0.127955662646914
0	0	0.316640051212198
1	0	0.54976203987129
1	0	0.469587319083074
0	0	0.202249954062986
1	0	0.603056306203801
0	0	-0.142451582160541
0	0	-0.124237052859021
0	0	0.0172452210715216
0	0	-0.0276888961834974
1	0	0.711499654513782
0	0	0.0976085061827543
0	0	0.318992018372528
1	0	0.569593231438727
1	0	0.628134815941295
1	0	0.356508765512251
0	0	0.382030467002987
0	0	0.207437114640791
0	0	0.00663261681470713
0	0	0.264939080721339
0	0	0.0788704751431779
0	0	-0.0320746693661987
0	0	-0.0767973982081756
1	0	0.63083685769005
1	0	0.574036463696788
0	0	0.197608445287246
0	0	0.0127599333813092
1	0	0.597533398230428
0	0	0.200653343467643
1	0	0.434124732757157
1	0	0.451017977260654
0	0	0.252320017492252
0	0	0.309513246918201
0	0	0.100993650909425
0	0	0.32534642458878
0	0	0.192502333917869
0	0	0.129214996397276
0	0	-0.0174443062502302
0	0	-0.0625297187814992
0	0	0.145212037027465
1	0	0.0903759058985823
0	0	0.324606408059824
0	0	0.129352377903776
0	0	0.0402737355930154
0	0	0.185669815805671
1	0	0.306914585098922
0	0	0.022383252452634
1	0	0.445282610940303
0	0	-0.031613700937586
0	0	-0.0159769163331815
0	0	0.157744259751689
1	0	0.346588703023148
0	0	0.0877064754212979
0	0	0.295880509205017
1	0	0.307942629155243
0	0	0.283206652285645
1	0	0.37383190379955
0	0	0.0423884424957937
1	0	0.495415311231101
1	0	0.456201461157628
0	0	-0.0136913131217301
1	0	0.317036186580983
0	0	0.291558156220361
0	0	0.450682570201878
0	0	0.196705099693847
0	0	0.126005258663303
0	0	0.119711752757483
0	0	0.297498954905763
1	0	0.506273260911814
0	0	0.0796380434641885
1	0	0.402220648123581
0	0	0.0112431885220161
0	0	0.138098385057987
0	0	0.00914324063971634
0	0	-0.200274889802962
0	0	0.257776435189079
0	0	0.337770237953596
0	0	0.319277634757215
1	0	0.514802699866499
0	0	0.208075539042252
0	0	0.434048958229743
1	0	0.416984829541301
0	0	0.315601969551061
1	0	0.707683514163809
0	0	0.351101462003491
1	0	0.336532190337478
0	0	0.178702932739154
0	0	-0.058760977754626
0	0	0.22839999089088
0	0	0.109598827617984
0	0	0.210084285792296
1	0	0.348745916752147
0	0	0.213057932990928
0	0	0.125648222810085
0	0	0.357904943113076
0	0	0.124058906140536
0	0	0.145030469884466
1	0	0.475103785116702
1	0	0.256163343980574
0	0	0.281433947026583
0	0	0.312772903518917
1	0	0.358991794447258
0	0	0.125812716052718
1	0	0.577156312533439
0	0	0.2771342256134
1	0	0.340707088416562
0	0	0.254980441787631
0	0	-0.043115246368844
0	0	-0.113720015248784
0	0	0.0954278218041984
1	0	0.463395163050191
0	0	0.179087416872976
0	0	0.36827391407954
1	0	0.305067488654577
0	0	0.257091696678228
0	0	0.378391821795942
0	0	0.264462692520035
0	0	0.0742475446344082
0	0	0.307469946153993
0	0	-0.0940563903898732
1	0	0.161295583339122
1	0	0.437430562799397
0	0	0.265628119981003
0	0	0.262544700921682
0	0	0.179956164327859
0	0	0.041365287271606
1	0	0.267396990241969
0	0	0.259855486305311
0	0	0.267226133880868
1	0	0.503128049044503
0	0	0.428984896641232
0	0	0.102951949169203
0	0	0.042424413779651
0	0	0.199455628601646
1	0	0.261599658859292
0	0	0.280791174352011
0	0	0.316381985565992
0	0	0.452799378256998
0	0	0.0706072035185201
0	0	0.236533297049436
0	0	0.181314197447711
0	0	0.172009306580657
0	0	0.515520038659306
0	0	0.0111568508762664
0	0	0.359661468126312
0	0	0.215630299592712
0	0	-0.0248510869691689
0	0	0.0677010700619071
0	0	0.13206507311499
0	0	0.242787212022785
0	0	-0.0737295601970599
0	0	0.315226418360845
1	0	0.471758894564824
0	0	0.146564999629266
0	0	0.198161931896185
0	0	0.272993548362272
0	0	0.397194839316023
0	0	-0.248559537622478
0	0	0.176064390073644
0	0	0.299798690221261
0	0	0.0960924897548651
0	0	-0.046208061543715
0	0	0.10159805393534
0	0	0.199569283732193
1	0	0.277221134364225
0	0	0.204125033023329
1	0	0.350702491759194
1	0	0.225160149941471
0	0	-0.00324519506467726
1	0	0.305588971897669
0	0	0.145787802765675
0	0	0.00834661596937943
0	0	-0.000516820465922353
0	0	-0.03179370483373
1	0	0.374871269352053
0	0	0.133631517254584
0	0	0.273631343697062
1	0	0.349297305801977
0	0	0.163633687682083
1	0	0.546949115243972
0	0	0.306773425024509
0	0	-0.0620407915406989
1	0	0.24466024990926
0	0	0.031855677847863
1	0	0.417071436254759
0	0	0.30112228970436
1	0	0.190527031339623
0	0	0.202704606345614
0	0	0.27196288264684
0	0	0.172773423811849
0	0	-0.0648279693093354
1	0	0.314837831478308
0	0	0.274376976373215
0	0	0.230854479961943
1	0	0.334476617940161
0	0	-0.0283511219461026
0	0	0.468072680594063
0	0	0.281250319990636
0	0	0.03282510777942
0	0	0.199987415404694
1	0	0.5704506394574
0	0	0.265721265305029
1	0	0.400932270167646
0	0	0.324566175265378
1	0	0.226894760452709
0	0	0.243309649907599
0	0	0.289145549157174
0	0	0.174464242507771
0	0	0.174701960353253
0	0	-0.0961510162972919
1	0	0.269795144977026
0	0	0.221193343726121
1	0	0.445823751047087
0	0	0.240406644461075
0	0	0.198236666913886
0	0	0.0732171693576264
0	0	0.228426484291872
0	0	0.223503500044156
0	0	0.13051410752086
0	0	0.163511440800417
0	0	0.316874462301519
0	0	0.348222056302167
0	0	0.0315110853711055
0	0	0.13160315338577
0	0	0.109180906433103
1	0	0.495898235421498
1	0	0.346972429541657
0	0	0.211391291430099
0	0	0.152825818794407
0	0	0.117890887458127
0	0	0.00372799674758607
0	0	0.00282304224049413
0	0	0.0162750450318877
0	0	0.143754870642548
1	0	0.258732761614989
0	0	0.191436639258536
1	0	0.324666738557469
1	0	0.353558422227101
1	0	0.19878540158602
0	0	0.113312805585346
1	0	0.311721902201236
1	0	0.451609088834344
0	0	0.215427020481157
0	0	0.193358950832794
0	0	0.221893927991131
0	0	-0.040123241040738
0	0	0.223412623830067
0	0	0.127634210147625
1	0	0.437014075304953
0	0	0.198106104843407
1	0	0.21404440695612
0	0	0.0618807036221586
0	0	0.16809430718033
1	0	0.409296146362511
0	0	-0.0327690389800224
0	0	0.16773787430796
1	0	0.202287999820211
0	0	0.0921786729386598
0	0	0.146974516725606
0	0	0.218588608530516
0	0	0.155765103109271
1	0	0.49499199230854
0	0	0.00479027530798186
0	0	0.280518533517761
1	0	0.329240047098587
0	0	0.404671722694697
0	0	0.0576367871892097
0	0	0.0821665517868875
0	0	0.264006964940706
0	0	0.317665245961816
0	0	0.356850769386111
0	0	0.251236851397041
0	0	0.0629163698029835
0	0	0.260845676279736
0	0	0.340972846118937
0	0	0.289106949731755
0	0	0.20104043375062
0	0	0.0638701485239406
0	0	0.24085726299418
0	0	0.121045204534365
0	0	0.237528469916571
0	0	0.192419650008536
0	0	0.152428722751659
0	0	-0.0675649832599736
0	0	0.233807717054521
0	0	0.254469781312579
0	0	-0.0527660455721934
1	0	0.414305497580271
0	0	0.0632373544223351
1	0	0.391182876743913
1	0	0.33247901340833
0	0	-0.04314536015388
0	0	0.0935541189320109
0	0	0.0136398362976976
0	0	0.293079228979037
0	0	0.225159844257915
0	0	0.243220520142674
1	0	0.495233092062519
1	0	0.214929168543036
0	0	0.0731526128892535
0	0	0.0378728781263269
1	0	0.238834788377747
0	0	0.494091327450732
1	0	0.224072051045938
1	0	0.086901922182506
0	0	0.105883437307406
0	0	-0.0666390863362482
0	0	-0.158605704251376
0	0	0.119700712274382
1	0	0.429024414053852
0	0	0.0248929650115501
0	0	0.18724356462925
0	0	0.00582594839498058
0	0	0.163552252350883
0	0	0.246257702752515
0	0	0.937404068685908
0	0	0.22761929488437
0	0	0.150126921007645
0	0	0.173518718236208
0	0	-0.00702121018070869
0	0	0.0098985530874633
0	0	0.328128638253217
0	0	0.340813233465756
0	0	0.0537306454629672
0	0	0.145086345662424
0	0	0.0919010013477873
0	0	0.366492190634948
1	0	0.280832740568469
1	0	0.277023554634795
1	0	0.359397503009743
0	0	0.116351138577408
0	0	0.0852587412349682
1	0	0.312550395289131
0	0	0.203517567450366
0	0	-0.0506780439842089
1	0	0.310663274426951
0	0	0.241147787773555
0	0	0.263913430162295
0	0	0.139397232147521
1	0	0.243115928200967
0	0	0.199901532804312
0	0	0.321193264258725
0	0	-0.0315573839769689
0	0	0.123224654335292
0	0	0.378570414909841
0	0	0.123416426221647
0	0	0.26163191252696
0	0	0.261733264299021
1	0	0.232572178742421
0	0	-0.1461673954579
1	0	0.421983573165591
0	0	0.0619775886784897
0	0	0.329154118451076
0	0	0.197846289211801
0	0	0.324832841574409
0	0	0.249745683638773
1	0	0.348131487756972
1	0	0.369220444773366
0	0	0.155313869142255
0	0	0.17907938969292
0	0	0.244783984518285
0	0	0.11431524590534
1	0	0.465606561880352
0	0	0.303443505062709
0	0	0.278548112195178
0	0	0.285966225790039
0	0	0.507041388954593
0	0	0.465078401013346
0	0	0.0690939595409568
0	0	0.259800267081073
1	0	0.555523386406234
1	0	0.533634855232
1	0	0.439217246552399
1	0	0.446418419267685
1	0	0.406409223377268
1	0	0.527119780015664
0	0	0.331063777700131
1	0	0.48776645760772
1	0	0.38986332716588
1	0	0.625234078889973
0	0	-0.187576555080896
0	0	0.0649369412712688
0	0	0.0680694816725837
0	0	0.0219220620289512
1	0	0.412068202927153
0	0	0.0842817972994484
0	0	-0.0680074971498888
0	0	0.136786736096015
1	0	0.476347932805406
1	0	0.331289380989893
1	0	0.151851279349328
1	0	0.36054015453533
0	0	0.15469123611184
0	0	0.208885331533385
1	0	0.595848457807724
1	0	0.311996312486185
0	0	-0.116599619349957
0	0	-0.0493115732015046
0	0	0.148362068022807
0	0	0.309605557020535
0	0	0.077356299570696
1	0	0.463816027598682
0	0	0.404292930682111
0	0	-0.07019679127291
0	0	-0.181396594144653
0	0	0.218131112502295
0	0	0.150075092747598
0	0	0.29843676580962
0	0	0.0895800718437579
0	0	-0.00306382356713903
0	0	0.162172876699267
1	0	0.36007762310733
0	0	0.0524733092303153
1	0	0.225413779882706
0	0	0.152013597410198
1	0	0.752624730427683
0	0	0.224778021045695
0	0	0.264809721322939
0	0	0.157202956779473
0	0	0.438608592910939
0	0	0.200417076087427
0	0	0.453130438268662
0	0	0.190377867437169
0	0	0.302953182758476
0	0	0.200177648445081
1	0	0.390567957105487
0	0	0.436199624542383
0	0	0.229374705368282
0	0	0.0973210112557853
1	0	0.307989322405499
0	0	0.0411349851032789
1	0	0.516098372960184
1	0	0.370252465450914
0	0	-0.0964251204772726
0	0	0.0527905273858944
0	0	0.0407845059265004
0	0	0.194608725333558
0	0	0.24946852608
1	0	0.19663572850211
0	0	0.12929398604462
0	0	0.388035893292888
1	0	0.516952308298787
0	0	0.0621212931022134
0	0	0.0614847027864183
1	0	0.480742806139284
1	0	0.8874467664982
1	0	0.443046843034692
0	0	0.134959926492716
0	0	-0.02685640631335
1	0	0.835664519200094
0	0	0.242765931035856
0	0	0.216392988558766
0	0	0.441136741533431
0	0	0.431264867033989
0	0	0.169588496620416
1	0	0.625671951215192
0	0	0.230594156008137
1	0	0.552643818611741
1	0	0.387435727118096
0	0	0.241620579568109
1	0	0.342986160839058
0	0	0.203350448139387
1	0	0.452459503040588
0	0	0.148365382759922
1	0	0.552541060427744
0	0	0.21139003817055
0	0	0.301876870923749
1	0	0.248340443553189
0	0	0.204424667450689
1	0	0.431884322945954
1	0	0.357634985493582
0	0	-0.0714324368990659
1	0	0.429651628327605
1	0	0.288471428893298
1	0	0.261579695958962
0	0	0.0223522444861723
0	0	0.142064931307761
1	0	0.264139692846095
1	0	0.244046242869945
0	0	-0.0401724737408557
1	0	0.190639930316149
0	0	0.138241849814938
1	0	0.639089484459517
0	0	0.320029203281839
0	0	0.157845655305933
0	0	0.0824629759689478
1	0	0.346832605864233
0	0	0.403987633535724
0	0	0.472877198362656
0	0	0.252687044831858
0	0	0.302464167766388
0	0	0.165768956717498
0	0	0.168978634000142
0	0	0.154161689347376
1	0	0.228604441121255
0	0	0.237374879721876
1	0	0.268639300201872
0	0	0.300417589945541
0	0	0.132891005465283
0	0	0.312072963754751
1	0	0.396032242695955
0	0	0.182799882620572
1	0	0.523639835113197
0	0	-0.0735315533701202
1	0	0.313092152753507
1	0	0.702142929187618
0	0	0.228816997085446
0	0	0.366991407556276
0	0	0.293478987828853
0	0	0.12864702024783
0	0	0.201752150945171
1	0	0.392618249497272
1	0	0.320274323364044
0	0	0.301213419061247
1	0	0.2041406895943
0	0	0.144161291324876
0	0	0.2769256979856
0	0	0.297063141110955
0	0	0.0559302843710622
0	0	0.383567286866503
0	0	0.246277891011148
0	0	0.201928358184112
0	0	0.415117238344874
0	0	0.144634729669076
0	0	0.12097723793435
0	0	0.113933818524356
0	0	0.170006663432831
0	0	-0.00783382093955601
1	0	0.360796514601134
0	0	0.158138205358786
0	0	-0.0552679979183864
0	0	0.267243291997187
1	0	0.170170923527417
1	0	0.10818118918154
1	0	0.468357508057764
0	0	-0.0938338933461197
1	0	0.372024472388633
0	0	0.221530259610489
0	0	0.027906299799273
1	0	0.447283938338036
0	0	-0.00292369220782135
0	0	0.0356188950522591
0	0	-0.132716702310151
0	0	0.0699216139184608
0	0	0.0124014678882991
0	0	0.0267758889677964
0	0	0.245796839055564
0	0	0.0544518465683119
0	0	0.12047904748205
1	0	0.333914160031835
0	0	0.561315762852778
1	0	0.543115694243525
0	0	0.182563625922478
0	0	-0.0384008055719589
0	0	0.278586593645362
0	0	0.168959450730339
0	0	-0.0571476762941453
1	0	0.402612478446432
1	0	0.40552721392161
0	0	0.238666531476246
1	0	0.0969962395374146
0	0	-0.00166617553414356
0	0	0.091514449807798
0	0	0.259624039715116
0	0	0.00974436711082748
0	0	0.214430830343941
0	0	0.101083728790535
0	0	0.20572587415252
0	0	-0.077441527743365
0	0	0.0912392265702532
0	0	0.200643714417228
0	0	0.0471098153789649
0	0	0.185765926109932
1	0	0.215271892770892
0	0	0.23330943103673
0	0	0.456851534468523
1	0	0.659583557954254
1	0	0.661827667726975
0	0	0.3289635593759
0	0	0.47282960828673
0	0	0.35224707988001
0	0	0.415817335801952
0	0	0.468731976073636
0	0	0.0358555644539708
0	0	0.0256813699783483
0	0	0.2627878975207
0	0	0.220069288066371
1	0	0.279689465782042
0	0	0.0431383699863256
1	0	-0.0128066638369581
0	0	0.248953612791569
1	0	0.477649470373949
0	0	0.137750777086612
0	0	0.268670476044907
0	0	0.225613545888415
0	0	-0.0951189633465598
0	0	0.0335280268525315
0	0	0.14607595576052
0	0	-0.0672828954127821
0	0	0.297822508468605
0	0	0.0357609604714628
0	0	0.103695262970528
0	0	0.129045856860062
0	0	0.0668375888247181
0	0	0.193259792813732
0	0	0.131337366246013
0	0	-0.0699471965754207
0	0	0.0889082963184125
0	0	-0.0295882623564463
0	0	0.247908920349557
0	0	0.194189635339965
0	0	0.267566189072182
0	0	-0.0982979974888065
0	0	0.276415411518202
0	0	0.11375953659766
0	0	0.0925069719869242
0	0	0.113750950592044
0	0	0.157201982549344
0	0	0.0087510921654262
0	0	0.345369129836358
0	0	0.0420573105146623
0	0	0.104806450555819
0	0	0.112361479559134
0	0	0.119100627641736
0	0	-0.0546217913893339
0	0	-0.00439981685891939
0	0	0.020855567324238
0	0	0.00784000488453428
0	0	-0.103666604163192
0	0	0.416349258927697
0	0	0.0665954320640263
0	0	0.03888462323941
0	0	0.134872007318973
0	0	0.185705784693583
0	0	0.259803844187889
0	0	0.405531045517578
0	0	0.290718188822214
0	0	0.233730692312808
1	0	0.576290229749068
0	0	0.110304328142799
0	0	0.203268797808072
0	0	0.504737550237144
0	0	-0.155079411059919
1	0	0.359697437704884
0	0	-0.0645722194960961
0	0	0.161047570802274
0	0	0.109931015713545
0	0	0.363312546262872
0	0	0.0724692487355189
0	0	0.222464142247952
0	0	0.236293487556619
0	0	0.238495863328447
1	0	0.38173893008156
0	0	0.281658635916065
0	0	0.0458391833138109
0	0	0.314606588375109
0	0	-0.0182278454030616
0	0	0.193947344979956
0	0	0.0589418553131497
0	0	0.218779059089939
0	0	0.0741982307632067
0	0	0.309552589462604
0	0	-0.00333331935490235
0	0	0.153369221799086
0	0	0.0366510075471115
0	0	0.0817003186285056
0	0	0.48075880207613
0	0	0.1563291578871
0	0	-0.0907772128058173
0	0	0.181229391196692
0	0	0.231866716738384
0	0	0.11020502476186
0	0	-0.0731720037166172
0	0	0.197635346875553
0	0	-0.0250355828755872
0	0	0.144076009532997
0	0	0.125325706979591
0	0	0.028034336191675
0	0	0.263898591728439
0	0	-0.0580210922759203
1	0	0.239613680523163
0	0	0.179571801932302
1	0	0.554633243709535
0	0	0.221196002983039
1	0	0.29821455824614
1	0	0.359697437704884
1	0	0.454329073897235
0	0	0.154887839037919
0	0	0.121959534755165
1	0	0.347689061986712
1	0	0.281642995536765
0	0	0.299655559114023
0	0	0.257623088120441
0	0	0.198825031396176
0	0	0.0878061056434379
0	0	0.0888008750246834
0	0	0.111146761270389
0	0	0.258239095746404
0	0	0.0569498510099229
0	0	0.211915377846634
0	0	0.183912593574365
0	0	0.234854659581414
0	0	-0.0374400319376979
0	0	-0.0907772128058173
0	0	-0.118170000071182
0	0	-0.0895385429226935
0	0	0.362625328515879
0	0	0.187931510615107
0	0	0.177227389307037
0	0	0.109959777511456
0	0	0.0258919524506223
0	0	0.227392189726486
1	0	0.172427219412961
0	0	0.0664362020183583
0	0	0.0215378611578253
0	0	0.187702630453125
0	0	0.0940831844337589
0	0	0.0692077762077055
0	0	0.209028748223492
0	0	0.341420039598401
0	0	0.20764214659841
0	0	0.0474419311518988
0	0	0.0155150973516708
0	0	0.0425101676413731
0	0	-0.0626128459356239
0	0	0.0678489799315272
0	0	0.483193629024245
0	0	0.262121293786036
0	0	0.25361388934076
0	0	0.0797402648653695
0	0	0.155683770992072
0	0	0.106400668797794
0	0	0.0569963557780376
0	0	0.0828088124874139
0	0	0.293413249454184
0	0	0.334670810293942
0	0	0.220916432858119
0	0	0.0038792236998665
0	0	-0.221446166720271
0	0	0.330090291869336
0	0	0.347020334442983
0	0	0.195462720529585
0	0	-0.163712663527786
0	0	0.205418267723454
0	0	0.124615575795582
0	0	0.106532610202478
1	0	0.26928438290008
1	0	0.330122291567302
1	0	0.264823601301735
0	0	0.113884886076771
0	0	0.20889235863515
0	0	0.179495517885981
1	0	0.430730767710926
1	0	0.836845262152329
0	0	0.274964821309768
0	0	-0.074931047577653
0	0	0.310585577945563
0	0	0.189552818763051
0	0	-0.0888943725719759
1	0	0.590786151832246
0	0	0.125334347086829
0	0	-0.127179128296067
0	0	0.299191625443863
0	0	0.218973039973534
0	0	0.100985969022772
1	0	0.418830624058395
1	0	0.525996966353039
1	0	0.549722014315997
0	0	0.1357233698924
0	0	0.311109905938209
0	0	0.266999865962301
0	0	0.0779723898220412
0	0	0.261203977506808
0	0	0.11404632770775
0	0	0.516419429861607
1	0	0.274855144403073
0	0	0.195377510129807
0	0	0.338480983355109
1	0	0.277276426636372
1	0	0.671693963848092
1	0	0.149550862636872
1	0	0.152417516274665
1	0	1.19099782038364
1	0	0.449003624364544
0	0	0.93717792943261
1	0	0.311663934832196
0	0	0.282456423534726
0	0	0.325474706302333
0	0	0.290935933509289
0	0	0.0865592144315077
0	0	0.021581956717039
0	0	0.0787258546991241
0	0	0.152436598274263
0	0	0.0719662348679192
0	0	0.0709395697310224
0	0	-0.164546739768584
0	0	0.272606193723903
0	0	-0.0823748072236268
0	0	0.122682600142159
0	0	-0.127767808630458
0	0	0.149664990088111
0	0	-0.140617802716778
0	0	0.102922734830291
0	0	0.0835698580808491
0	0	0.198974531415172
0	0	0.447135246061066
0	0	0.330570641692645
0	0	0.209073990592308
0	0	0.269509023821541
0	0	0.0927158773977375
0	0	0.0884262394591625
0	0	0.184524508767202
0	0	0.174237978664834
0	0	0.278055256352947
0	0	-0.204454290655214
0	0	0.242589702363019
0	0	0.27459054645028
0	0	0.00961626176536751
0	0	0.359922090893216
0	0	0.183574315606984
0	0	0.123082453394649
0	0	0.135177653519081
0	0	0.237660203467115
0	0	0.498633001974116
0	0	-0.0590472727222308
0	0	0.175167981797023
0	0	0.190611115872033
0	0	0.196714287342953
0	0	0.0752261515753584
0	0	-0.0395526971930707
1	0	0.68079892500359
1	0	0.22208181079241
1	0	0.251295388960201
0	0	0.133317558994386
0	0	0.1035709147158
1	0	0.226432022139084
0	0	0.0464738918267483
0	0	0.230572794743273
0	0	0.116279420894864
1	0	0.468030203259273
1	0	1.07112999528473
1	0	0.485740930144903
0	0	-0.034890468243117
1	0	0.320310825130156
0	0	0.14156037289333
0	0	0.389445277087473
0	0	-0.0107646534255054
0	0	-0.0989688667368324
0	0	0.122725359832294
0	0	0.23605870703994
0	0	0.268932435518381
0	0	0.268506423354158
0	0	0.268906789717783
0	0	0.489320706880287
0	0	0.283938602255867
0	0	0.275365404932615
0	0	0.175958982072206
0	0	0.161800172546567
0	0	0.283696497991375
0	0	0.269350825097623
0	0	0.339856070429169
0	0	0.209592741227732
0	0	0.341684874127626
0	0	0.311663934832196
0	0	0.33568068626854
0	0	0.225059350636964
0	0	0.0848951671700722
0	0	0.365151145915417
0	0	0.234846665384095
0	0	0.186667852525412
1	0	0.202260166091569
0	0	0.49742389650648
0	0	0.122936124065141
0	0	0.0722190602113448
0	0	0.255236924454167
1	0	0.847665927197905
0	0	0.308669028589374
1	0	0.332170796965823
0	0	0.160915529672112
0	0	-0.144169368236284
0	0	0.180283819701711
0	0	0.0630532438932403
0	0	0.479338293886752
0	0	0.105843139471193
0	0	0.206649691066554
0	0	0.102407715402878
0	0	0.28087933784289
1	0	0.559792184866362
0	0	0.647615909233805
0	0	0.0960383213997406
1	0	0.301919919929847
0	0	0.230897857260056
0	0	0.248869375164209
0	0	0.387349662811929
0	0	0.242699868730258
1	0	0.267990081694716
0	0	0.334986556944633
0	0	0.315381185389759
0	0	0.298481174573118
0	0	0.957044730422374
0	0	0.312216477622239
0	0	-0.0180021958096899
0	0	0.0840647839534058
0	0	0.318124343297295
0	0	0.274923129728894
0	0	0.079349997236372
0	0	0.0625723669036064
1	0	0.776441107607433
1	0	0.53198697038966
0	0	0.390131187170448
0	0	0.268535262243157
0	0	-0.0171676867866812
0	0	0.306980613907177
0	0	0.312557890199522
0	0	0.272170400074232
0	0	-0.0989133982609095
0	0	0.163209335639471
1	0	0.602459067844788
0	0	0.211693874734383
0	0	0.0796867956458623
0	0	0.108933247420999
0	0	0.210618257306903
0	0	0.523622915440664
0	0	0.294001020025078
0	0	0.372972930296658
0	0	0.293651371254937
0	0	0.397956705739572
0	0	0.42635003598798
0	0	0.343801646085306
1	0	0.333390702654068
1	0	0.383714189141228
1	0	0.485908950887318
1	0	0.307475966100106
1	0	0.389374280111797
1	0	0.326397024949915
1	0	0.559656278793221
1	0	0.293651371254937
0	0	0.0463647324419673
0	0	0.138129898387244
0	0	0.30545778777228
0	0	0.190927604688429
0	0	0.172977277521044
0	0	0.323672310550368
0	0	0.257123657222997
0	0	0.16756342621413
0	0	0.303026354456053
0	0	0.116228410314181
0	0	0.191009329934283
0	0	0.137542486918699
1	0	0.531441157374181
0	0	0.221601116945905
0	0	0.353693249845798
0	0	0.201230501051642
0	0	0.262541516204356
0	0	0.299655559114023
0	0	0.350868759188755
0	0	0.207014773164981
0	0	0.223789461405779
0	0	0.191580177650474
0	0	0.309196627106631
0	0	0.317668122691282
0	0	0.405193641202213
0	0	0.196530923311775
0	0	0.305659746973109
0	0	0.299655559114023
0	0	0.287647183395851
0	0	0.161913503623471
0	0	0.190947016586368
0	0	0.33568068626854
0	0	0.329676498409454
1	0	0.265436678557827
0	0	0.347689061986712
0	0	0.091433583241792
0	0	0.33568068626854
0	0	0.164965049088185
1	0	0.151494366758231
1	0	0.383474216689126
0	0	0.101941531363466
0	0	0.153232806290093
0	0	0.372196761431853
1	0	0.533192570133271
1	0	0.25068177288512
0	0	-0.0328133308662856
0	0	0.334562720168825
0	0	0.161718856418992
0	0	0.207267790035601
0	0	0.1905277298391
0	0	-0.14764772676927
0	0	0.116046686042155
0	0	0.279167336677302
0	0	0.017211563041829
0	0	0.041354160357892
0	0	-0.100901674414843
1	0	0.927378301867987
0	0	0.0260055038655762
1	0	0.49533279962267
0	0	0.0301723440433022
1	0	0.212778014304555
1	0	0.253396251649261
0	0	0.112974002650585
0	0	0.0635877940251256
0	0	-0.0783061311337426
1	0	0.0635574803145777
1	0	0.372226326404261
0	0	0.158194905096253
0	0	0.094876956565151
1	0	0.362176769359235
0	0	0.221247343728996
0	0	0.401569022119314
0	0	0.037857830989328
1	0	0.225996380574517
1	0	0.47917806879984
0	0	0.298642316862065
0	0	0.348030272637078
0	0	0.164017436701142
1	0	0.342192470029189
0	0	0.167093167257842
0	0	0.147624614079484
1	0	0.501347463651821
1	0	0.708775366912098
1	0	0.341363087634625
0	0	-0.0107444051157856
1	0	0.0542797553223655
0	0	0.153320969059683
0	0	0.135887345661243
1	0	0.0971192982695618
0	0	-0.00894010384693027
1	0	0.285729184113763
1	0	0.457886572326746
0	0	0.0464940714415471
0	0	0.187449194292783
0	0	0.0495531753701834
0	0	0.0884208698221303
1	0	0.324090454063568
0	0	0.135812675140244
0	0	0.211513677123087
0	0	0.205353707196742
0	0	0.0559047428913047
1	0	0.808089317181331
0	0	0.2694662788794
1	0	0.160252421288639
0	0	0.164292930290762
0	0	-0.0883806869029471
1	0	1.51271246526502
0	0	0.177942139272773
0	0	0.152855299553318
1	0	0.588572022632388
0	0	0.194105469924416
0	0	0.0414394299232251
0	0	0.0917716117536222
0	0	0.0667348129640538
0	0	0.0879604721043696
0	0	0.0721164542031237
0	0	0.106998440096467
0	0	0.300888818519797
1	0	0.261004759458379
0	0	0.133422120080407
0	0	0.227380505794684
0	0	0.364693233931368
1	0	0.311749114076909
1	0	0.128760267603298
1	0	0.440298464150949
1	0	0.310343450366613
0	0	0.247946250134119
1	0	0.329093513070298
1	0	0.551935668661044
0	0	0.537947469008259
1	0	0.211662566013725
1	0	0.25863435705027
1	0	0.278828876533646
1	0	0.352971099148059
1	0	0.247114515123214
1	0	0.427797538045225
0	0	0.38417357861675
1	0	0.33491105456443
1	0	0.276694922681286
1	0	0.324596243122657
0	0	0.407317625780593
1	0	0.309064487661287
1	0	0.347024112461281
0	0	0.226097466565866
1	0	0.296043624734027
1	0	0.640146363054105
0	0	0.299917251767369
0	0	0.453435197567505
1	0	0.319132420952463
1	0	0.30215839194605
0	0	0.209496149986043
0	0	0.30608165938435
0	0	0.338584182745702
1	0	0.104518637851576
0	0	0.489083374972905
1	0	0.352544803704286
1	0	0.430908640942839
1	0	0.229775518981719
1	0	0.322932512727948
1	0	0.362148567235117
1	0	0.275601616618226
0	0	0.566329890601039
0	0	0.482174441899569
0	0	-0.0285453216893271
1	0	0.274408976055176
0	0	0.356234087697071
1	0	0.176032649189871
0	0	0.247805537514479
0	0	0.280860872617296
0	0	0.138163951325118
1	0	0.343542831442055
0	0	0.341684874127626
0	0	0.311663934832196
0	0	0.203626427347196
0	0	0.22760530480499
0	0	0.353693249845798
1	0	0.22760530480499
0	0	0.0753208029523505
0	0	0.318620355150865
0	0	0.227867737846688
0	0	0.278678018064375
1	0	0.156232090722902
0	0	0.137377796403184
0	0	0.261324063133164
0	0	0.154685686441257
0	0	0.243290854759654
0	0	0.107037251789951
1	0	0.385345947285463
0	0	0.192208253678574
0	0	0.305863620712577
0	0	0.245143099421122
0	0	0.0107599412158038
0	0	0.300458810255353
0	0	0.0920617334499872
0	0	0.0163590462842178
0	0	-0.0662211319312271
0	0	-0.122853564601494
0	0	0.205725354220908
0	0	0.162657922830728
0	0	0.191554109216088
0	0	0.439066497614573
0	0	0.136710911866718
0	0	0.235657003771825
0	0	0.268082181760214
0	0	0.0342540710113244
0	0	0.0981300166412091
1	0	0.401664945477416
0	0	0.180755435545622
0	0	0.136607276610225
0	0	0.334157713142788
0	0	0.270100461131085
0	0	0.199655539835716
1	0	0.394513653640321
0	0	0.514609589263286
1	0	0.347631804459539
0	0	0.255074683406561
0	0	0.31989017433531
0	0	0.139540322504489
1	0	0.285134357036297
0	0	-0.0569881267141183
0	0	-0.0373103090794712
0	0	0.10303012222181
0	0	0.223361189101017
0	0	0.117953230180888
0	0	0.203389616295294
0	0	0.130611567315755
0	0	0.25540418353485
0	0	0.23470327846655
0	0	0.0562530825184455
1	0	0.270784653857353
1	0	0.298516916729833
0	0	0.0279139505461773
0	0	0.315980510725594
0	0	0.088344319918857
0	0	0.192723436859221
0	0	0.375060880954842
1	0	0.550761341673222
1	0	0.867054492526488
0	0	-0.0597520847853062
1	0	0.387144723900634
0	0	0.0572692439232821
0	0	0.294321928649958
1	0	0.424784715831546
1	0	0.381807418537736
0	0	0.325170665784264
1	0	0.531496091678926
0	0	0.465135227355156
1	0	0.458227474964756
1	0	0.867054492526488
0	0	0.458234067571129
0	0	0.331229179226766
1	0	0.348514256072429
0	0	0.497393144207463
0	0	0.364528826650547
1	0	0.670892583672685
0	0	-0.0790014479596962
0	0	0.240969698359659
0	0	0.357868793062027
0	0	0.192307415093848
0	0	0.45723689879146
0	0	0.379207710778509
0	0	0.453388582908839
0	0	0.611658740405436
0	0	0.138440881989059
0	0	0.167760457925244
0	0	0.382704047805839
0	0	0.134402327592663
0	0	0.279598225363838
0	0	0.0110409660137615
0	0	0.310520561681907
1	0	0.38415393490206
1	0	0.281031054333156
1	0	0.236134336880034
1	0	0.391228097737618
1	0	0.364547583606971
1	0	0.219984677590757
1	0	0.449608419265153
1	0	0.535843279187933
1	0	0.634325279188243
1	0	0.428002383069302
1	0	0.526206970847064
1	0	0.316840849913491
0	0	0.222031062077813
0	0	0.00442357109179961
0	0	0.245093745025289
0	0	0.262957200279225
0	0	0.0929426823813896
0	0	0.259847337232838
0	0	0.135858835496352
1	0	0.306149399187706
0	0	0.203352678438472
0	0	0.210110351318336
0	0	0.232111301823585
0	0	0.227071271428445
0	0	0.117038167488967
0	0	-0.0965498842819182
0	0	0.0432354548471164
0	0	0.274200062126399
0	0	-0.0102712061655899
1	0	0.223570069004284
1	0	0.285368348306238
0	0	0.23177862475054
0	0	0.216907050402742
0	0	0.30071692163546
1	0	0.941540625100115
0	0	0.132983886156178
0	0	-0.113885477110359
0	0	0.13343863025985
0	0	0.12952848460416
0	0	0.135977823331513
0	0	-0.0518886836475921
0	0	0.256648175123958
0	0	0.039672181421449
1	0	0.408507404169303
0	0	-0.0777573509377094
0	0	0.0834058026436458
0	0	-0.0752454389236279
1	0	0.34453620899811
0	0	0.185658997163813
0	0	0.287727562814818
1	0	0.527147848635789
1	0	0.402332691660977
1	0	0.50465818987286
1	0	0.183323005485118
1	0	0.782103603166024
0	0	-0.0194326079050118
0	0	-0.155207643514648
1	0	0.535679421366325
1	0	0.225962366561295
0	0	0.132608102495117
0	0	0.0120121373641254
0	0	-0.0169741279819243
0	0	-0.0297872270809438
0	0	0.00686544990140889
1	0	0.394123337748654
1	0	0.293806990370657
0	0	0.172613519960805
0	0	0.265411706924651
0	0	0.10073677506638
0	0	0.0233074421794044
0	0	-0.0508207643074499
1	0	0.457540003855808
0	0	0.0852784744551272
0	0	0.216306121391201
0	0	0.246262677448879
0	0	0.280401170162393
0	0	0.81901028615888
0	0	0.00903844564361756
0	0	0.017185199839329
0	0	-0.0156673301811822
1	0	0.482281136895256
0	0	0.338428782916253
0	0	0.0107548769630813
0	0	0.154118729429925
0	0	0.0468888315306367
0	0	0.170290210349027
0	0	0.0161413807631448
0	0	0.262200388573244
0	0	0.165229492283705
0	0	0.222082744166707
1	0	0.374914941221536
0	0	0.166207669544041
0	0	0.140220145741723
0	0	-0.0654573978361704
0	0	0.312455628753199
0	0	0.0487239801463222
0	0	0.16500485403776
0	0	0.36149228082188
0	0	-0.0262990267705334
0	0	0.00516998297736548
0	0	0.285094508354069
1	0	0.413511524168154
0	0	0.309176959667215
1	0	0.43286388658434
0	0	0.198512519682476
0	0	-0.0273330525765395
0	0	0.0663325386310467
1	0	0.536503249385678
0	0	0.0581901179618049
0	0	0.297713730987471
1	0	0.225178374667553
0	0	0.124568375201242
0	0	0.0867898045666694
1	0	0.562613903123428
0	0	0.705179113957661
0	0	0.0580315464607436
0	0	0.116024896029061
0	0	0.139995183983457
0	0	0.363752797866809
0	0	0.165237204205197
0	0	0.146208624218951
0	0	0.242454800237463
0	0	0.275180516567938
0	0	0.0392444689329199
1	0	0.528741655413408
0	0	0.177585970069441
0	0	0.0368957839951163
0	0	0.17983494468412
0	0	0.20974090200946
1	0	0.302732315792099
0	0	0.28772599264913
0	0	-0.0844696910573469
0	0	0.104812414059871
0	0	0.0806527992744611
1	0	0.689439482449201
0	0	0.368609544493769
0	0	0.0592373218848932
0	0	0.228006284247552
0	0	0.272372945808203
0	0	0.249200801369549
0	0	0.796196477338778
0	0	0.525568437873026
0	0	0.230197375773817
0	0	-0.0802694675723438
0	0	0.382833602579191
0	0	0.294888562715503
0	0	-0.00991574722935637
0	0	0.317949846841404
0	0	0.177415812352618
0	0	0.234635309651628
0	0	0.15875025011513
0	0	0.280417909347631
0	0	0.348780153107538
0	0	0.254774580755112
1	0	0.620102263262862
1	0	0.302715185395891
0	0	-0.0016731255578617
0	0	0.0780163885166662
0	0	0.229024315984159
0	0	0.315249969997967
0	0	0.245867493783024
0	0	0.255589875702017
0	0	0.156307949015836
0	0	-0.253393225626523
0	0	0.223105228859188
0	0	0.185884821236153
0	0	0.38121249637685
0	0	-0.210700408908292
0	0	0.257626244100421
0	0	0.136273049735976
0	0	0.315192399702662
0	0	0.436749677701643
0	0	0.181667036954994
0	0	0.235674657189167
0	0	0.365003036860473
0	0	0.125949727158949
0	0	0.031047529491671
0	0	0.380885709195966
0	0	0.217141466766496
0	0	0.137219397028394
0	0	-0.00385347219148182
1	0	0.336617475884236
1	0	0.564321645531282
1	0	0.992467092402238
0	0	0.13695965945626
0	0	0.0216407521096054
0	0	0.282075358645817
0	0	0.425932140843298
0	0	0.252502659265727
0	0	0.239760922873681
0	0	0.36675088310838
0	0	0.108695428437602
0	0	0.0345820772392724
0	0	0.182237031931442
0	0	0.166530116174907
[truncated: 28,794 more rows]
